# Supplementary material for: The bacterial communities of Drosophila suzukii collected from undamaged cherries
Source: PeerJ. 2014 Jul 22;2:e474. doi: 10.7717/peerj.474 (PMC4121540; doi:10.7717/peerj.474)
Supplement: Data S3 — Spreadsheet describing the abundance of each OTU in each sample. OTUs removed from the final analysis are indicated. [file peerj-02-474-s003.xlsx]

## Sheet: Sheet1
OTU ID	Removed from Dataset?	Total	L1	L2	L3	A1	A2	A3	Closest hit in SILVA SSU Reference Database Release 111	%ID	Query Coverage	Evalue
denovo794		208495	50268	64682	247	17104	44117	32077	JN175342.1.1527_Bacteria;Proteobacteria;Gammaproteobacteria;Enterobacteriales;Enterobacteriaceae;Tatumella;Tatumella_punctata	100	253	7e-141
denovo795		41625	35	15	38	36473	106	4958	X80775.1.1448_Bacteria;Proteobacteria;Alphaproteobacteria;Rhodospirillales;Acetobacteraceae;Gluconobacter;Gluconobacter_cerinus	100	253	7e-141
denovo1737	Chloroplast	4208	1031	1588	8	710	567	304	Z00044.138378.139868_Bacteria;Cyanobacteria;Chloroplast;Nicotiana_tabacum_(common_tobacco)	99.6	253	2e-138
denovo400	Wolbachia	2612	526	2	1	492	15	1576	U83098.1.1385_Bacteria;Proteobacteria;Alphaproteobacteria;Rickettsiales;Anaplasmataceae;Wolbachia;Wolbachia_sp.	100	253	7e-141
denovo1136		2305	3	4	1	1154	1	1142	JF793952.1.1353_Bacteria;Proteobacteria;Alphaproteobacteria;Rhodospirillales;Acetobacteraceae;Acetobacter;Acetobacter_cerevisiae	100	253	7e-141
denovo1723		608	0	0	0	0	0	608	JF128989.1.1367_Bacteria;Proteobacteria;Gammaproteobacteria;Xanthomonadales;Xanthomonadaceae;Dyella;uncultured_bacterium	100	253	7e-141
denovo789	Mitochondria	513	161	207	2	101	11	31	JN872551.174566.176564_Bacteria;Proteobacteria;Alphaproteobacteria;Rickettsiales;mitochondria;Lotus_japonicus	98.33	240	1e-123
denovo2362		422	1	1	1	51	0	368	X73820.1.1476_Bacteria;Proteobacteria;Alphaproteobacteria;Rhodospirillales;Acetobacteraceae;Gluconobacter;Gluconobacter_oxydans	100	253	7e-141
denovo2380		321	1	0	2	0	0	318	HM128172.1.1462_Bacteria;Proteobacteria;Gammaproteobacteria;Pasteurellales;Pasteurellaceae;Orbus;uncultured_bacterium	97.24	254	2e-122
denovo2967	Low Query Coverage	203	0	0	0	0	0	203	FJ820457.1.1483_Bacteria;Tenericutes;Mollicutes;Acholeplasmatales;Acholeplasmataceae;Acholeplasma;uncultured_bacterium	90.16	61	6e-12
denovo893		183	10	18	0	79	8	68	X86591.1.1427_Bacteria;Proteobacteria;Gammaproteobacteria;Pseudomonadales;Moraxellaceae;Acinetobacter;Acinetobacter_sp.	99.6	253	2e-138
denovo2588		166	1	5	0	146	0	14	HQ880415.1.1372_Bacteria;Proteobacteria;Gammaproteobacteria;Enterobacteriales;Enterobacteriaceae;Cronobacter;Cronobacter_dublinensis	100	253	7e-141
denovo209		88	0	0	0	0	0	88	X82290.1.1476_Bacteria;Proteobacteria;Alphaproteobacteria;Rhodospirillales;Acetobacteraceae;Gluconobacter;Gluconobacter_frateurii	98.02	253	6e-129
denovo2774		88	3	4	0	64	2	15	X86623.1.1364_Bacteria;Proteobacteria;Gammaproteobacteria;Pseudomonadales;Pseudomonadaceae;Pseudomonas;Pseudomonas_sp.	100	253	7e-141
denovo1199	Chloroplast	61	3	20	1	2	28	7	AJ536455.1.1480_Bacteria;Cyanobacteria;Chloroplast;Asterionellopsis_glacialis	99.6	253	2e-138
denovo416		61	0	0	0	0	0	61	AB178412.1.1409_Bacteria;Proteobacteria;Alphaproteobacteria;Rhodospirillales;Acetobacteraceae;Gluconobacter;Gluconobacter_albidus	99.21	253	4e-136
denovo750		48	0	0	0	37	0	11	EU409601.1.1482_Bacteria;Proteobacteria;Alphaproteobacteria;Rhodospirillales;Acetobacteraceae;uncultured;Commensalibacter_intestini	100	253	7e-141
denovo1434		40	0	5	0	18	3	14	JF915329.1.1395_Bacteria;Proteobacteria;Betaproteobacteria;Burkholderiales;Comamonadaceae;Comamonas;Comamonas_terrigena	100	253	7e-141
denovo1452		38	2	2	0	17	0	17	JN411373.1.1278_Bacteria;Proteobacteria;Betaproteobacteria;Neisseriales;Neisseriaceae;Aquitalea;Aquitalea_sp._IARI-V-6	100	253	7e-141
denovo2025		38	4	7	0	15	1	11	JQ398853.1.1465_Bacteria;Firmicutes;Bacilli;Bacillales;Bacillaceae;Bacillus;Bacillus_subtilis	100	253	7e-141
denovo1980		36	2	1	0	14	0	19	JN624746.1.1207_Bacteria;Proteobacteria;Gammaproteobacteria;Xanthomonadales;Xanthomonadaceae;Stenotrophomonas;Stenotrophomonas_maltophilia	100	253	7e-141
denovo968		36	0	0	0	0	0	36	X82290.1.1476_Bacteria;Proteobacteria;Alphaproteobacteria;Rhodospirillales;Acetobacteraceae;Gluconobacter;Gluconobacter_frateurii	98.17	218	2e-110
denovo317		25	8	5	0	2	6	4	JN175342.1.1527_Bacteria;Proteobacteria;Gammaproteobacteria;Enterobacteriales;Enterobacteriaceae;Tatumella;Tatumella_punctata	96.39	249	5e-117
denovo278		23	0	0	0	0	0	23	HM556761.1.1322_Bacteria;Proteobacteria;Alphaproteobacteria;Rhodospirillales;Acetobacteraceae;Acetobacter;uncultured_bacterium	98.42	253	3e-131
denovo2471		21	1	3	0	8	0	9	JQ318957.1.1489_Bacteria;Proteobacteria;Betaproteobacteria;Burkholderiales;Oxalobacteraceae;Massilia;uncultured_Janthinobacterium_sp.	100	253	7e-141
denovo1400		19	3	8	3	1	1	3	GQ416312.1.1463_Bacteria;Proteobacteria;Gammaproteobacteria;Enterobacteriales;Enterobacteriaceae;Klebsiella;uncultured_Klebsiella_sp.	98.02	253	6e-129
denovo882	Chloroplast	19	0	0	0	19	0	0	HQ664631.16745.18231_Bacteria;Cyanobacteria;Chloroplast;Cinnamomum_camphora_(camphor_tree)	99.17	242	2e-129
denovo1563	Archaea	18	3	5	4	2	1	3	JQ226656.1.1336_Archaea;Thaumarchaeota;Marine_Group_I;Candidatus_Nitrosopumilus;uncultured_marine_archaeon	99.6	253	2e-138
denovo1622		18	2	6	1	2	4	3	JF706534.1.1396_Bacteria;Proteobacteria;Gammaproteobacteria;Enterobacteriales;Enterobacteriaceae;Erwinia;Erwinia_rhapontici	97.23	253	4e-124
denovo2043		18	1	9	1	2	4	1	JN977279.1.1533_Bacteria;Proteobacteria;Gammaproteobacteria;BD7-8_marine_group;uncultured_bacterium	100	253	7e-141
denovo899	Chloroplast	18	0	1	0	17	0	0	JN854175.84680.86171_Bacteria;Cyanobacteria;Chloroplast;Pinus_patula	99.2	250	3e-134
denovo2219		17	0	8	2	0	7	0	EU574674.1.1439_Bacteria;Proteobacteria;Epsilonproteobacteria;Campylobacterales;Helicobacteraceae;Sulfurimonas;uncultured_bacterium	99.2	250	3e-134
denovo2574		17	0	0	0	5	4	8	X81665.1.1460_Bacteria;Proteobacteria;Gammaproteobacteria;Pseudomonadales;Moraxellaceae;Acinetobacter;Acinetobacter_lwoffii	100	253	7e-141
denovo2765		17	0	0	0	0	0	17	HM556761.1.1322_Bacteria;Proteobacteria;Alphaproteobacteria;Rhodospirillales;Acetobacteraceae;Acetobacter;uncultured_bacterium	98.02	253	6e-129
denovo3342		17	1	2	0	11	0	3	JN644603.1.1538_Bacteria;Proteobacteria;Betaproteobacteria;Burkholderiales;Comamonadaceae;Delftia;Delftia_lacustris	100	253	7e-141
denovo780		16	4	5	1	1	2	3	JN175342.1.1527_Bacteria;Proteobacteria;Gammaproteobacteria;Enterobacteriales;Enterobacteriaceae;Tatumella;Tatumella_punctata	96.84	253	9e-122
denovo1419		15	0	0	0	0	0	15	X82290.1.1476_Bacteria;Proteobacteria;Alphaproteobacteria;Rhodospirillales;Acetobacteraceae;Gluconobacter;Gluconobacter_frateurii	98.02	253	6e-129
denovo2989		15	4	6	0	3	2	0	HM558240.1.1372_Bacteria;Proteobacteria;Gammaproteobacteria;Enterobacteriales;Enterobacteriaceae;Tatumella;uncultured_bacterium	97.23	253	4e-124
denovo3270		14	0	3	0	0	9	2	HM264792.1.1341_Bacteria;Actinobacteria;Actinobacteria;Micrococcales;Dermabacteraceae;Brachybacterium;uncultured_bacterium	100	253	7e-141
denovo2048		13	4	6	0	0	1	2	JN990099.1.1503_Bacteria;Proteobacteria;Gammaproteobacteria;Enterobacteriales;Enterobacteriaceae;Enterobacter;uncultured_bacterium	97.23	253	4e-124
denovo216		13	0	0	0	0	0	13	X82290.1.1476_Bacteria;Proteobacteria;Alphaproteobacteria;Rhodospirillales;Acetobacteraceae;Gluconobacter;Gluconobacter_frateurii	98.02	253	6e-129
denovo1483		11	2	6	1	0	1	1	JN175342.1.1527_Bacteria;Proteobacteria;Gammaproteobacteria;Enterobacteriales;Enterobacteriaceae;Tatumella;Tatumella_punctata	96.84	253	9e-122
denovo2529		11	3	5	0	1	1	1	Z96078.1.1495_Bacteria;Proteobacteria;Gammaproteobacteria;Enterobacteriales;Enterobacteriaceae;Enterobacter;Enterobacter_cancerogenus	96.05	253	5e-105
denovo2677		11	0	0	0	4	1	6	JN176590.1.1312_Bacteria;Proteobacteria;Alphaproteobacteria;Sphingomonadales;Sphingomonadaceae;Sphingomonas;Sphingomonas_sp._PDD-47b-3	100	253	7e-141
denovo3332		11	3	5	0	1	0	2	JN175342.1.1527_Bacteria;Proteobacteria;Gammaproteobacteria;Enterobacteriales;Enterobacteriaceae;Tatumella;Tatumella_punctata	96.84	253	9e-122
denovo130		10	1	0	1	2	3	3	FJ404760.1.1489_Bacteria;Proteobacteria;Gammaproteobacteria;Enterobacteriales;Enterobacteriaceae;Enterobacter;Mangrovibacter_sp._WG-1	97.63	253	2e-126
denovo193		10	2	3	1	1	2	1	JN175342.1.1527_Bacteria;Proteobacteria;Gammaproteobacteria;Enterobacteriales;Enterobacteriaceae;Tatumella;Tatumella_punctata	96.84	253	9e-122
denovo3307		10	1	0	0	6	0	3	EU794729.1.1426_Bacteria;Bacteroidetes;Flavobacteria;Flavobacteriales;Flavobacteriaceae;Wautersiella;Empedobacter;Empedobacter_sp._FM-1	100	253	7e-141
denovo3309		10	1	2	0	2	1	4	JQ319066.1.1528_Bacteria;Firmicutes;Bacilli;Bacillales;Bacillaceae;Bacillus;Bacillus_nealsonii	100	253	7e-141
denovo712		10	0	0	0	0	0	10	HM556761.1.1322_Bacteria;Proteobacteria;Alphaproteobacteria;Rhodospirillales;Acetobacteraceae;Acetobacter;uncultured_bacterium	98.42	253	3e-131
denovo2598		9	0	0	0	4	0	5	JN989297.1.1469_Bacteria;Proteobacteria;Betaproteobacteria;Burkholderiales;Alcaligenaceae;Bordetella;Achromobacter_sp._A4067	100	253	7e-141
denovo1006		8	3	3	0	1	0	1	HM558240.1.1372_Bacteria;Proteobacteria;Gammaproteobacteria;Enterobacteriales;Enterobacteriaceae;Tatumella;uncultured_bacterium	97.23	253	4e-124
denovo1104		8	2	1	0	1	4	0	JN175342.1.1527_Bacteria;Proteobacteria;Gammaproteobacteria;Enterobacteriales;Enterobacteriaceae;Tatumella;Tatumella_punctata	96.84	253	9e-122
denovo1657		8	5	2	0	0	1	0	JN175342.1.1527_Bacteria;Proteobacteria;Gammaproteobacteria;Enterobacteriales;Enterobacteriaceae;Tatumella;Tatumella_punctata	96.84	253	9e-122
denovo19		8	0	3	0	0	0	5	JN872545.1.1379_Bacteria;Proteobacteria;Alphaproteobacteria;Sphingomonadales;Sphingomonadaceae;Sphingomonas;Sphingomonadaceae_bacterium_SAP56_1	100	253	7e-141
denovo1910		8	0	0	0	0	0	8	GQ240639.1.1326_Bacteria;Proteobacteria;Alphaproteobacteria;Rhodospirillales;Acetobacteraceae;Acetobacter;Acetobacter_pasteurianus	99.21	253	4e-136
denovo2840		8	0	3	0	0	3	2	JN175342.1.1527_Bacteria;Proteobacteria;Gammaproteobacteria;Enterobacteriales;Enterobacteriaceae;Tatumella;Tatumella_punctata	96.84	253	9e-122
denovo3419		8	2	2	0	1	1	2	JN175342.1.1527_Bacteria;Proteobacteria;Gammaproteobacteria;Enterobacteriales;Enterobacteriaceae;Tatumella;Tatumella_punctata	96.84	253	9e-122
denovo41		8	3	2	0	0	2	1	JN175342.1.1527_Bacteria;Proteobacteria;Gammaproteobacteria;Enterobacteriales;Enterobacteriaceae;Tatumella;Tatumella_punctata	96.84	253	9e-122
denovo489		8	0	0	0	7	0	1	HM443953.1.1438_Bacteria;Firmicutes;Bacilli;Lactobacillales;Leuconostocaceae;Leuconostoc;Leuconostoc_pseudomesenteroides	100	253	7e-141
denovo500		8	2	1	0	1	3	1	JN175342.1.1527_Bacteria;Proteobacteria;Gammaproteobacteria;Enterobacteriales;Enterobacteriaceae;Tatumella;Tatumella_punctata	96.44	253	2e-119
denovo1275		7	0	0	0	3	2	2	JF135953.1.1366_Bacteria;Proteobacteria;Gammaproteobacteria;Xanthomonadales;Xanthomonadaceae;Stenotrophomonas;uncultured_bacterium	100	253	7e-141
denovo143		7	0	0	0	7	0	0	JF145628.1.1339_Bacteria;Actinobacteria;Actinobacteria;Frankiales;Geodermatophilaceae;Blastococcus;uncultured_bacterium	98.81	253	6e-126
denovo1440		7	0	2	0	4	0	1	JQ320094.1.1393_Bacteria;Proteobacteria;Alphaproteobacteria;Rhizobiales;Rhizobiaceae;Rhizobium;Agrobacterium_tumefaciens	100	253	7e-141
denovo1533		7	1	3	0	1	1	1	JN175342.1.1527_Bacteria;Proteobacteria;Gammaproteobacteria;Enterobacteriales;Enterobacteriaceae;Tatumella;Tatumella_punctata	96.77	217	9e-103
denovo160		7	0	3	0	3	0	1	X80736.1.1464_Bacteria;Actinobacteria;Actinobacteria;Micrococcales;Micrococcaceae;Arthrobacter;Arthrobacter_globiformis	100	253	7e-141
denovo3212		7	1	2	0	1	2	1	JN175342.1.1527_Bacteria;Proteobacteria;Gammaproteobacteria;Enterobacteriales;Enterobacteriaceae;Tatumella;Tatumella_punctata	96.44	253	2e-119
denovo3487		7	0	1	0	1	0	5	Y12593.1.1470_Bacteria;Firmicutes;Bacilli;Bacillales;Staphylococcaceae;Staphylococcus;Staphylococcus_caprae	100	253	7e-141
denovo530		7	2	3	1	0	1	0	JN175342.1.1527_Bacteria;Proteobacteria;Gammaproteobacteria;Enterobacteriales;Enterobacteriaceae;Tatumella;Tatumella_punctata	96.44	253	2e-119
denovo883		7	2	2	0	0	2	1	HM556457.1.1373_Bacteria;Proteobacteria;Gammaproteobacteria;Enterobacteriales;Enterobacteriaceae;Tatumella;uncultured_bacterium	97.23	253	4e-124
denovo1226		6	2	1	0	2	0	1	JN175342.1.1527_Bacteria;Proteobacteria;Gammaproteobacteria;Enterobacteriales;Enterobacteriaceae;Tatumella;Tatumella_punctata	96.84	253	9e-122
denovo1668		6	2	1	0	0	1	2	JN175342.1.1527_Bacteria;Proteobacteria;Gammaproteobacteria;Enterobacteriales;Enterobacteriaceae;Tatumella;Tatumella_punctata	96.84	253	9e-122
denovo1743		6	4	2	0	0	0	0	Z96078.1.1495_Bacteria;Proteobacteria;Gammaproteobacteria;Enterobacteriales;Enterobacteriaceae;Enterobacter;Enterobacter_cancerogenus	97.63	253	2e-126
denovo2314	Chloroplast	6	0	5	0	0	1	0	EU016845.1.1492_Bacteria;Cyanobacteria;Chloroplast;Cycas_micronesica	98.02	253	6e-129
denovo2356		6	0	1	0	1	2	2	JN175342.1.1527_Bacteria;Proteobacteria;Gammaproteobacteria;Enterobacteriales;Enterobacteriaceae;Tatumella;Tatumella_punctata	97.2	250	2e-122
denovo2388		6	2	1	0	0	3	0	JN175342.1.1527_Bacteria;Proteobacteria;Gammaproteobacteria;Enterobacteriales;Enterobacteriaceae;Tatumella;Tatumella_punctata	96.84	253	9e-122
denovo2484		6	0	4	0	0	1	1	HM558240.1.1372_Bacteria;Proteobacteria;Gammaproteobacteria;Enterobacteriales;Enterobacteriaceae;Tatumella;uncultured_bacterium	96.84	253	8e-110
denovo275		6	0	0	0	2	1	3	AY238333.1.1465_Bacteria;Bacteroidetes;Flavobacteria;Flavobacteriales;Flavobacteriaceae;Flavobacterium;cf._Cytophaga_sp._MDA2507	100	253	7e-141
denovo2768		6	0	2	1	1	2	0	JF268404.1.1492_Bacteria;Proteobacteria;Gammaproteobacteria;Alteromonadales;Alteromonadaceae;OM60(NOR5)_clade;uncultured_bacterium	99.6	253	2e-138
denovo2796		6	0	0	1	2	3	0	FN396670.1.1413_Bacteria;Proteobacteria;Gammaproteobacteria;CS-B046;uncultured_marine_bacterium	95.65	253	1e-114
denovo3266		6	0	0	0	1	0	5	JF346082.1.1337_Bacteria;Proteobacteria;Alphaproteobacteria;Rhodospirillales;Acetobacteraceae;Gluconacetobacter;Gluconacetobacter_saccharivorans	100	253	7e-141
denovo3283		6	3	2	0	0	1	0	JN175342.1.1527_Bacteria;Proteobacteria;Gammaproteobacteria;Enterobacteriales;Enterobacteriaceae;Tatumella;Tatumella_punctata	96.84	253	9e-122
denovo3409		6	3	1	0	0	1	1	JN175342.1.1527_Bacteria;Proteobacteria;Gammaproteobacteria;Enterobacteriales;Enterobacteriaceae;Tatumella;Tatumella_punctata	96.84	253	9e-122
denovo3455		6	2	2	0	0	2	0	JF344167.1.1518_Bacteria;Proteobacteria;Deltaproteobacteria;Desulfobacterales;Desulfobacteraceae;Desulfobacula;uncultured_delta_proteobacterium	100	253	7e-141
denovo607		6	0	4	0	0	0	2	HM558240.1.1372_Bacteria;Proteobacteria;Gammaproteobacteria;Enterobacteriales;Enterobacteriaceae;Tatumella;uncultured_bacterium	97.4	192	1e-92
denovo785		6	0	4	0	2	0	0	HM038004.1.1472_Bacteria;Proteobacteria;Gammaproteobacteria;Enterobacteriales;Enterobacteriaceae;Providencia;Providencia_burhodogranariea	100	253	7e-141
denovo865		6	2	2	0	0	1	1	JN175342.1.1527_Bacteria;Proteobacteria;Gammaproteobacteria;Enterobacteriales;Enterobacteriaceae;Tatumella;Tatumella_punctata	96.84	253	9e-122
denovo945		6	1	3	0	1	0	1	JF706534.1.1396_Bacteria;Proteobacteria;Gammaproteobacteria;Enterobacteriales;Enterobacteriaceae;Erwinia;Erwinia_rhapontici	97.23	253	4e-124
denovo1025		5	0	1	1	2	1	0	JN175342.1.1527_Bacteria;Proteobacteria;Gammaproteobacteria;Enterobacteriales;Enterobacteriaceae;Tatumella;Tatumella_punctata	96.84	253	9e-122
denovo1100		5	0	3	0	1	1	0	HQ787611.1.1463_Bacteria;Proteobacteria;Gammaproteobacteria;Enterobacteriales;Enterobacteriaceae;Enterobacter;uncultured_organism	97.23	253	4e-124
denovo1190		5	1	3	0	1	0	0	JN175342.1.1527_Bacteria;Proteobacteria;Gammaproteobacteria;Enterobacteriales;Enterobacteriaceae;Tatumella;Tatumella_punctata	96.84	253	9e-122
denovo1265		5	0	1	0	1	1	2	JN175342.1.1527_Bacteria;Proteobacteria;Gammaproteobacteria;Enterobacteriales;Enterobacteriaceae;Tatumella;Tatumella_punctata	96.44	253	2e-119
denovo1411		5	2	2	0	1	0	0	JN175342.1.1527_Bacteria;Proteobacteria;Gammaproteobacteria;Enterobacteriales;Enterobacteriaceae;Tatumella;Tatumella_punctata	96.84	253	9e-122
denovo1559		5	2	2	0	0	1	0	JN049601.1.1503_Bacteria;Proteobacteria;Gammaproteobacteria;Xanthomonadales;Xanthomonadaceae;Stenotrophomonas;Klebsiella_sp._Y6	97.23	253	4e-124
denovo1717		5	0	2	0	0	3	0	JF344074.1.1504_Bacteria;Proteobacteria;Gammaproteobacteria;Alteromonadales;Alteromonadaceae;Haliea;uncultured_gamma_proteobacterium	99.21	253	4e-136
denovo1771		5	0	2	0	1	2	0	FN554139.1.1491_Bacteria;Proteobacteria;Gammaproteobacteria;Alteromonadales;Alteromonadaceae;OM60(NOR5)_clade;uncultured_sediment_bacterium	99.21	253	4e-136
denovo1913		5	2	2	0	0	0	1	JN175342.1.1527_Bacteria;Proteobacteria;Gammaproteobacteria;Enterobacteriales;Enterobacteriaceae;Tatumella;Tatumella_punctata	96.91	194	2e-91
denovo2127		5	0	3	0	0	2	0	JN175342.1.1527_Bacteria;Proteobacteria;Gammaproteobacteria;Enterobacteriales;Enterobacteriaceae;Tatumella;Tatumella_punctata	96.84	253	9e-122
denovo2249		5	1	1	1	0	2	0	JN175342.1.1527_Bacteria;Proteobacteria;Gammaproteobacteria;Enterobacteriales;Enterobacteriaceae;Tatumella;Tatumella_punctata	96.84	253	9e-122
denovo2330		5	2	1	0	0	0	2	JN175342.1.1527_Bacteria;Proteobacteria;Gammaproteobacteria;Enterobacteriales;Enterobacteriaceae;Tatumella;Tatumella_punctata	95.85	217	6e-98
denovo2331		5	3	2	0	0	0	0	JF706534.1.1396_Bacteria;Proteobacteria;Gammaproteobacteria;Enterobacteriales;Enterobacteriaceae;Erwinia;Erwinia_rhapontici	97.23	253	4e-124
denovo2351		5	0	0	1	1	0	3	JF706534.1.1396_Bacteria;Proteobacteria;Gammaproteobacteria;Enterobacteriales;Enterobacteriaceae;Erwinia;Erwinia_rhapontici	96.05	253	5e-117
denovo2359		5	1	3	0	0	1	0	HM558240.1.1372_Bacteria;Proteobacteria;Gammaproteobacteria;Enterobacteriales;Enterobacteriaceae;Tatumella;uncultured_bacterium	97.42	194	7e-94
denovo241		5	2	2	0	0	0	1	JF706534.1.1396_Bacteria;Proteobacteria;Gammaproteobacteria;Enterobacteriales;Enterobacteriaceae;Erwinia;Erwinia_rhapontici	95.26	253	3e-112
denovo2491		5	0	0	0	1	1	3	EU236320.1.1370_Bacteria;Proteobacteria;Epsilonproteobacteria;Campylobacterales;Campylobacteraceae;Arcobacter;uncultured_bacterium	99.21	253	4e-136
denovo2547		5	0	1	1	0	1	2	JN175342.1.1527_Bacteria;Proteobacteria;Gammaproteobacteria;Enterobacteriales;Enterobacteriaceae;Tatumella;Tatumella_punctata	96.84	253	9e-122
denovo2548		5	0	0	0	0	1	4	AJ717394.1.1486_Bacteria;Proteobacteria;Gammaproteobacteria;Cardiobacteriales;Cardiobacteriaceae;Suttonella;Suttonella_ornithocola	96.4	250	1e-117
denovo2622		5	1	3	0	1	0	0	JF706534.1.1396_Bacteria;Proteobacteria;Gammaproteobacteria;Enterobacteriales;Enterobacteriaceae;Erwinia;Erwinia_rhapontici	97.23	253	4e-124
denovo2790		5	0	0	0	5	0	0	HQ750408.1.1460_Bacteria;Proteobacteria;Gammaproteobacteria;Xanthomonadales;Xanthomonadaceae;Stenotrophomonas;uncultured_organism	99.21	253	4e-136
denovo2870		5	2	2	0	0	1	0	JN175342.1.1527_Bacteria;Proteobacteria;Gammaproteobacteria;Enterobacteriales;Enterobacteriaceae;Tatumella;Tatumella_punctata	96.84	253	9e-122
denovo2874		5	0	2	0	0	0	3	HM556940.1.1327_Bacteria;Proteobacteria;Gammaproteobacteria;Enterobacteriales;Enterobacteriaceae;Escherichia-Shigella;uncultured_bacterium	96.84	253	9e-122
denovo2931		5	0	4	0	0	1	0	JN175342.1.1527_Bacteria;Proteobacteria;Gammaproteobacteria;Enterobacteriales;Enterobacteriaceae;Tatumella;Tatumella_punctata	96.05	253	5e-117
denovo2968		5	0	3	0	2	0	0	HM110603.1.1377_Bacteria;Proteobacteria;Gammaproteobacteria;Oceanospirillales;Halomonadaceae;Zymobacter;uncultured_gamma_proteobacterium	99.6	253	2e-138
denovo3108		5	0	0	0	0	0	5	X82290.1.1476_Bacteria;Proteobacteria;Alphaproteobacteria;Rhodospirillales;Acetobacteraceae;Gluconobacter;Gluconobacter_frateurii	97.94	243	5e-123
denovo3237		5	1	2	0	0	2	0	JN175342.1.1527_Bacteria;Proteobacteria;Gammaproteobacteria;Enterobacteriales;Enterobacteriaceae;Tatumella;Tatumella_punctata	96.84	253	9e-122
denovo3296		5	2	2	0	0	0	1	JN175342.1.1527_Bacteria;Proteobacteria;Gammaproteobacteria;Enterobacteriales;Enterobacteriaceae;Tatumella;Tatumella_punctata	96.77	217	9e-103
denovo3445		5	1	2	0	1	1	0	JF706534.1.1396_Bacteria;Proteobacteria;Gammaproteobacteria;Enterobacteriales;Enterobacteriaceae;Erwinia;Erwinia_rhapontici	97.23	253	4e-124
denovo422		5	0	2	0	0	1	2	JN175342.1.1527_Bacteria;Proteobacteria;Gammaproteobacteria;Enterobacteriales;Enterobacteriaceae;Tatumella;Tatumella_punctata	96.44	253	2e-119
denovo496		5	0	3	0	0	2	0	JN175342.1.1527_Bacteria;Proteobacteria;Gammaproteobacteria;Enterobacteriales;Enterobacteriaceae;Tatumella;Tatumella_punctata	96.84	253	9e-122
denovo550		5	0	1	0	0	0	4	JQ247009.1.1471_Bacteria;Actinobacteria;Actinobacteria;Micrococcales;Brevibacteriaceae;Brevibacterium;Brevibacterium_sp._SRI_158	100	253	7e-141
denovo756		5	0	0	0	0	0	5	X82290.1.1476_Bacteria;Proteobacteria;Alphaproteobacteria;Rhodospirillales;Acetobacteraceae;Gluconobacter;Gluconobacter_frateurii	98.02	253	6e-129
denovo783		5	1	0	0	0	3	1	JN175342.1.1527_Bacteria;Proteobacteria;Gammaproteobacteria;Enterobacteriales;Enterobacteriaceae;Tatumella;Tatumella_punctata	96.84	253	9e-122
denovo934		5	4	1	0	0	0	0	JN175342.1.1527_Bacteria;Proteobacteria;Gammaproteobacteria;Enterobacteriales;Enterobacteriaceae;Tatumella;Tatumella_punctata	96.84	253	9e-122
denovo1008		4	3	0	0	0	1	0	HM556852.1.1374_Bacteria;Proteobacteria;Gammaproteobacteria;Enterobacteriales;Enterobacteriaceae;Tatumella;uncultured_bacterium	97.63	253	2e-126
denovo1034		4	2	2	0	0	0	0	HQ418832.1.1501_Bacteria;Proteobacteria;Gammaproteobacteria;Enterobacteriales;Enterobacteriaceae;Enterobacter;Citrobacter_freundii	96.44	253	2e-119
denovo1038		4	2	1	1	0	0	0	JN175342.1.1527_Bacteria;Proteobacteria;Gammaproteobacteria;Enterobacteriales;Enterobacteriaceae;Tatumella;Tatumella_punctata	96.84	253	1e-111
denovo1043		4	0	3	0	0	0	1	HM558240.1.1372_Bacteria;Proteobacteria;Gammaproteobacteria;Enterobacteriales;Enterobacteriaceae;Tatumella;uncultured_bacterium	97.23	253	4e-124
denovo1055		4	0	0	0	0	2	2	JN175342.1.1527_Bacteria;Proteobacteria;Gammaproteobacteria;Enterobacteriales;Enterobacteriaceae;Tatumella;Tatumella_punctata	96.05	253	5e-117
denovo1137		4	0	3	0	0	1	0	JN175342.1.1527_Bacteria;Proteobacteria;Gammaproteobacteria;Enterobacteriales;Enterobacteriaceae;Tatumella;Tatumella_punctata	96.84	253	9e-122
denovo1270		4	0	0	0	4	0	0	JN846926.1.1338_Bacteria;Proteobacteria;Alphaproteobacteria;Rhodospirillales;Acetobacteraceae;Roseomonas;Roseomonas_sp._HH10H133	100	253	7e-141
denovo1299		4	0	3	0	0	1	0	GU941096.1.1413_Bacteria;Proteobacteria;Gammaproteobacteria;Aeromonadales;Aeromonadaceae;Aeromonas;uncultured_bacterium	97.63	253	2e-126
denovo1370		4	0	2	0	0	1	1	JN175342.1.1527_Bacteria;Proteobacteria;Gammaproteobacteria;Enterobacteriales;Enterobacteriaceae;Tatumella;Tatumella_punctata	96.84	253	9e-122
denovo1412		4	0	0	0	0	4	0	JN977235.1.1534_Bacteria;Spirochaetes;Spirochaetes;Spirochaetales;Spirochaetaceae;Spirochaeta;uncultured_bacterium	95.26	253	3e-112
denovo1441		4	2	1	0	1	0	0	JN194132.1.1320_Bacteria;Proteobacteria;Gammaproteobacteria;Enterobacteriales;Enterobacteriaceae;Pantoea;bacterium_MPB_JP_b	96.84	253	9e-122
denovo1488		4	0	1	0	2	1	0	JN546222.1.1357_Bacteria;Proteobacteria;Betaproteobacteria;Burkholderiales;Oxalobacteraceae;Herbaspirillum;Herbaspirillum_sp._MMD15	98.81	253	1e-133
denovo1520		4	1	3	0	0	0	0	JN175342.1.1527_Bacteria;Proteobacteria;Gammaproteobacteria;Enterobacteriales;Enterobacteriaceae;Tatumella;Tatumella_punctata	96.44	253	2e-119
denovo1525		4	1	2	0	0	0	1	JN175342.1.1527_Bacteria;Proteobacteria;Gammaproteobacteria;Enterobacteriales;Enterobacteriaceae;Tatumella;Tatumella_punctata	96.84	253	9e-122
denovo154		4	0	1	0	1	2	0	JN175342.1.1527_Bacteria;Proteobacteria;Gammaproteobacteria;Enterobacteriales;Enterobacteriaceae;Tatumella;Tatumella_punctata	94.86	253	8e-110
denovo1562		4	0	2	0	0	0	2	Y11196.568.2088_Bacteria;Actinobacteria;Actinobacteria;Corynebacteriales;Nocardiaceae;Rhodococcus;Rhodococcus_fascians	100	253	7e-141
denovo1654		4	1	0	0	0	1	2	JN175342.1.1527_Bacteria;Proteobacteria;Gammaproteobacteria;Enterobacteriales;Enterobacteriaceae;Tatumella;Tatumella_punctata	96.41	223	6e-104
denovo1767		4	0	2	1	0	1	0	JN175342.1.1527_Bacteria;Proteobacteria;Gammaproteobacteria;Enterobacteriales;Enterobacteriaceae;Tatumella;Tatumella_punctata	96.88	192	3e-90
denovo1775		4	0	0	0	4	0	0	L32813.1.1497_Bacteria;Firmicutes;Bacilli;Lactobacillales;Streptococcaceae;Lactococcus;Lactococcus_garvieae	100	252	3e-140
denovo1942		4	0	3	0	0	1	0	JN175342.1.1527_Bacteria;Proteobacteria;Gammaproteobacteria;Enterobacteriales;Enterobacteriaceae;Tatumella;Tatumella_punctata	96.84	253	9e-122
denovo2078		4	1	1	0	0	1	1	JN175342.1.1527_Bacteria;Proteobacteria;Gammaproteobacteria;Enterobacteriales;Enterobacteriaceae;Tatumella;Tatumella_punctata	96.44	253	2e-119
denovo2169		4	0	0	0	0	0	4	JQ044419.1.1364_Bacteria;Proteobacteria;Alphaproteobacteria;Rhodospirillales;Acetobacteraceae;Gluconobacter;Gluconobacter_frateurii	97.62	210	2e-103
denovo2175		4	1	0	1	0	2	0	JF958137.1.1407_Bacteria;Proteobacteria;Gammaproteobacteria;Enterobacteriales;Enterobacteriaceae;Pectobacterium;Erwinia_sp._JSC-N3-112-2	96.4	250	1e-117
denovo218		4	1	1	0	0	2	0	DQ068760.1.1462_Bacteria;Proteobacteria;Gammaproteobacteria;Enterobacteriales;Enterobacteriaceae;Trabulsiella;Salmonella_sp._Co9936	96.44	253	2e-119
denovo2206		4	0	1	0	2	0	1	JN175342.1.1527_Bacteria;Proteobacteria;Gammaproteobacteria;Enterobacteriales;Enterobacteriaceae;Tatumella;Tatumella_punctata	96.84	253	9e-122
denovo2232		4	2	0	0	0	1	1	JN175342.1.1527_Bacteria;Proteobacteria;Gammaproteobacteria;Enterobacteriales;Enterobacteriaceae;Tatumella;Tatumella_punctata	96.05	253	5e-117
denovo2235		4	2	2	0	0	0	0	JN175342.1.1527_Bacteria;Proteobacteria;Gammaproteobacteria;Enterobacteriales;Enterobacteriaceae;Tatumella;Tatumella_punctata	96.84	253	9e-122
denovo2318		4	1	1	0	0	1	1	HM556852.1.1374_Bacteria;Proteobacteria;Gammaproteobacteria;Enterobacteriales;Enterobacteriaceae;Tatumella;uncultured_bacterium	97.23	253	4e-124
denovo2325		4	0	3	1	0	0	0	FJ425215.1.1438_Bacteria;Bacteroidetes;Flavobacteria;Flavobacteriales;Flavobacteriaceae;Tenacibaculum;Polaribacter_sp._K17-17	100	253	7e-141
denovo2511		4	2	0	0	0	1	1	JN175342.1.1527_Bacteria;Proteobacteria;Gammaproteobacteria;Enterobacteriales;Enterobacteriaceae;Tatumella;Tatumella_punctata	96.84	253	9e-122
denovo2582		4	0	0	0	2	0	2	U96938.1.1476_Bacteria;Proteobacteria;Betaproteobacteria;Burkholderiales;Burkholderiaceae;Burkholderia;Burkholderia_sp._C3B1M	100	253	7e-141
denovo2694		4	2	2	0	0	0	0	JN175342.1.1527_Bacteria;Proteobacteria;Gammaproteobacteria;Enterobacteriales;Enterobacteriaceae;Tatumella;Tatumella_punctata	96.84	253	9e-122
denovo277		4	0	4	0	0	0	0	DQ269105.1.1408_Bacteria;Planctomycetes;Planctomycetacia;Planctomycetales;Planctomycetaceae;Blastopirellula;uncultured_planctomycete	97.62	252	6e-126
denovo2789		4	2	0	0	0	0	2	JN175342.1.1527_Bacteria;Proteobacteria;Gammaproteobacteria;Enterobacteriales;Enterobacteriaceae;Tatumella;Tatumella_punctata	96.84	253	9e-122
denovo2798		4	0	1	0	3	0	0	JN644558.1.1554_Bacteria;Firmicutes;Bacilli;Lactobacillales;Enterococcaceae;Enterococcus;Enterococcus_silesiacus	100	253	7e-141
denovo2807		4	3	0	0	1	0	0	FN869544.1.1438_Bacteria;Proteobacteria;Gammaproteobacteria;Order_Incertae_Sedis;Family_Incertae_Sedis;Sedimenticola;Myrtea_flabelliformis_gill_endosymbiont	98.42	253	3e-131
denovo2809		4	0	1	0	1	0	2	U26261.1.1456_Bacteria;Proteobacteria;Gammaproteobacteria;Pseudomonadales;Pseudomonadaceae;Pseudomonas;Pseudomonas_stutzeri	99.6	253	2e-138
denovo290		4	1	1	0	2	0	0	FN429792.1.1506_Bacteria;Proteobacteria;Deltaproteobacteria;Desulfobacterales;Desulfobulbaceae;uncultured;uncultured_delta_proteobacterium	99.21	253	4e-136
denovo2959		4	0	0	0	0	4	0	FN563293.1.1443_Bacteria;Bacteroidetes;Bacteroidia;Bacteroidales;Bacteroidaceae;Bacteroides;uncultured_bacterium	97.63	253	2e-126
denovo2985		4	0	0	0	3	0	1	JN175342.1.1527_Bacteria;Proteobacteria;Gammaproteobacteria;Enterobacteriales;Enterobacteriaceae;Tatumella;Tatumella_punctata	96.84	253	9e-122
denovo3105		4	0	0	0	0	0	4	X82290.1.1476_Bacteria;Proteobacteria;Alphaproteobacteria;Rhodospirillales;Acetobacteraceae;Gluconobacter;Gluconobacter_frateurii	97.63	253	2e-126
denovo3135		4	0	0	0	2	2	0	JN175342.1.1527_Bacteria;Proteobacteria;Gammaproteobacteria;Enterobacteriales;Enterobacteriaceae;Tatumella;Tatumella_punctata	97.2	250	2e-122
denovo315		4	4	0	0	0	0	0	JN175342.1.1527_Bacteria;Proteobacteria;Gammaproteobacteria;Enterobacteriales;Enterobacteriaceae;Tatumella;Tatumella_punctata	96.05	253	5e-117
denovo3185		4	2	1	0	0	0	1	JN175342.1.1527_Bacteria;Proteobacteria;Gammaproteobacteria;Enterobacteriales;Enterobacteriaceae;Tatumella;Tatumella_punctata	96.84	253	9e-122
denovo3287		4	0	0	0	0	2	2	FJ716945.1.1521_Bacteria;Bacteroidetes;Bacteroidia;Bacteroidales;Porphyromonadaceae;uncultured;uncultured_bacterium	99.6	253	2e-138
denovo3299		4	1	2	0	0	0	1	JN175342.1.1527_Bacteria;Proteobacteria;Gammaproteobacteria;Enterobacteriales;Enterobacteriaceae;Tatumella;Tatumella_punctata	96.05	253	5e-117
denovo412		4	0	0	0	0	0	4	X82290.1.1476_Bacteria;Proteobacteria;Alphaproteobacteria;Rhodospirillales;Acetobacteraceae;Gluconobacter;Gluconobacter_frateurii	97.63	253	2e-126
denovo481		4	2	0	0	0	1	1	JF706534.1.1396_Bacteria;Proteobacteria;Gammaproteobacteria;Enterobacteriales;Enterobacteriaceae;Erwinia;Erwinia_rhapontici	96.84	253	9e-122
denovo582		4	0	1	0	2	1	0	JN194132.1.1320_Bacteria;Proteobacteria;Gammaproteobacteria;Enterobacteriales;Enterobacteriaceae;Pantoea;bacterium_MPB_JP_b	96.84	253	9e-122
denovo628		4	1	1	0	1	0	1	JN175342.1.1527_Bacteria;Proteobacteria;Gammaproteobacteria;Enterobacteriales;Enterobacteriaceae;Tatumella;Tatumella_punctata	96.84	253	9e-122
denovo692		4	1	0	1	0	2	0	JN977206.1.1534_Bacteria;Proteobacteria;Deltaproteobacteria;Desulfobacterales;Desulfobulbaceae;uncultured;uncultured_bacterium	96.84	253	9e-122
denovo739		4	1	1	1	1	0	0	HQ787611.1.1463_Bacteria;Proteobacteria;Gammaproteobacteria;Enterobacteriales;Enterobacteriaceae;Enterobacter;uncultured_organism	97.63	253	2e-126
denovo784		4	3	1	0	0	0	0	JF706534.1.1396_Bacteria;Proteobacteria;Gammaproteobacteria;Enterobacteriales;Enterobacteriaceae;Erwinia;Erwinia_rhapontici	97.23	253	4e-124
denovo798		4	0	4	0	0	0	0	HQ385508.1.1404_Bacteria;Planctomycetes;OM190;uncultured_bacterium	92.86	252	3e-97
denovo801		4	2	1	0	0	0	1	JN175342.1.1527_Bacteria;Proteobacteria;Gammaproteobacteria;Enterobacteriales;Enterobacteriaceae;Tatumella;Tatumella_punctata	96.84	253	9e-122
denovo816		4	0	0	0	1	0	3	JN175342.1.1527_Bacteria;Proteobacteria;Gammaproteobacteria;Enterobacteriales;Enterobacteriaceae;Tatumella;Tatumella_punctata	96.84	253	9e-122
denovo872		4	0	0	0	1	2	1	JN175342.1.1527_Bacteria;Proteobacteria;Gammaproteobacteria;Enterobacteriales;Enterobacteriaceae;Tatumella;Tatumella_punctata	97.2	250	2e-110
denovo91		4	1	2	0	0	0	1	HM556457.1.1373_Bacteria;Proteobacteria;Gammaproteobacteria;Enterobacteriales;Enterobacteriaceae;Tatumella;uncultured_bacterium	97.63	253	2e-126
denovo923		4	0	3	0	0	1	0	EF515426.1.1399_Bacteria;Proteobacteria;Gammaproteobacteria;Enterobacteriales;Enterobacteriaceae;Raoultella;Enterobacter;uncultured_bacterium	97.23	253	4e-124
denovo1023		3	0	0	0	1	1	1	JN175342.1.1527_Bacteria;Proteobacteria;Gammaproteobacteria;Enterobacteriales;Enterobacteriaceae;Tatumella;Tatumella_punctata	96.8	219	6e-104
denovo107		3	0	1	0	0	2	0	JN175342.1.1527_Bacteria;Proteobacteria;Gammaproteobacteria;Enterobacteriales;Enterobacteriaceae;Tatumella;Tatumella_punctata	96.44	253	2e-119
denovo1076		3	0	1	0	0	1	1	HM558240.1.1372_Bacteria;Proteobacteria;Gammaproteobacteria;Enterobacteriales;Enterobacteriaceae;Tatumella;uncultured_bacterium	96.84	253	9e-122
denovo1079		3	2	0	1	0	0	0	Z96078.1.1495_Bacteria;Proteobacteria;Gammaproteobacteria;Enterobacteriales;Enterobacteriaceae;Enterobacter;Enterobacter_cancerogenus	95.26	253	3e-100
denovo1082		3	2	0	0	0	0	1	HM558240.1.1372_Bacteria;Proteobacteria;Gammaproteobacteria;Enterobacteriales;Enterobacteriaceae;Tatumella;uncultured_bacterium	96.84	253	9e-122
denovo1158	Mitochondria	3	0	0	0	0	3	0	HQ840789.3935.6332_Bacteria;Proteobacteria;Alphaproteobacteria;Rickettsiales;mitochondria;Phaeodactylum_tricornutum	85.14	249	2e-45
denovo1164		3	1	1	0	0	1	0	JF706534.1.1396_Bacteria;Proteobacteria;Gammaproteobacteria;Enterobacteriales;Enterobacteriaceae;Erwinia;Erwinia_rhapontici	97.23	253	4e-124
denovo1174		3	0	0	0	1	1	1	JN175342.1.1527_Bacteria;Proteobacteria;Gammaproteobacteria;Enterobacteriales;Enterobacteriaceae;Tatumella;Tatumella_punctata	96.44	253	2e-119
denovo120		3	0	2	0	0	1	0	GU991524.1.1497_Bacteria;Bacteroidetes;Flavobacteria;Flavobacteriales;Flavobacteriaceae;uncultured;marine_bacterium_J20-17	99.6	253	2e-138
denovo123		3	0	0	0	0	1	2	EU704833.1.1228_Bacteria;Proteobacteria;Alphaproteobacteria;Rhizobiales;Methylobacteriaceae;Methylobacterium;uncultured_Methylobacterium_sp.	100	250	4e-139
denovo1254		3	1	0	1	0	1	0	JN175342.1.1527_Bacteria;Proteobacteria;Gammaproteobacteria;Enterobacteriales;Enterobacteriaceae;Tatumella;Tatumella_punctata	96.84	253	9e-122
denovo1278		3	1	0	2	0	0	0	HQ153883.1.1390_Bacteria;Proteobacteria;Gammaproteobacteria;Chromatiales;Granulosicoccaceae;Granulosicoccus;uncultured_bacterium	94.86	253	8e-110
denovo1332		3	0	3	0	0	0	0	EF562547.1.1481_Bacteria;Bacteroidetes;Class_Incertae_Sedis;Order_Incertae_Sedis;Family_Incertae_Sedis;Prolixibacter;uncultured_Cytophaga_sp.	94.47	253	2e-107
denovo1436		3	0	2	0	0	0	1	JF119129.1.1361_Bacteria;Proteobacteria;Gammaproteobacteria;Enterobacteriales;Enterobacteriaceae;Klebsiella;uncultured_bacterium	95.65	253	1e-114
denovo1482		3	0	2	0	0	0	1	EU289465.1.1506_Bacteria;Proteobacteria;Gammaproteobacteria;Enterobacteriales;Enterobacteriaceae;Trabulsiella;uncultured_bacterium	96.84	253	9e-122
denovo1497		3	1	1	0	0	0	1	FJ404760.1.1489_Bacteria;Proteobacteria;Gammaproteobacteria;Enterobacteriales;Enterobacteriaceae;Enterobacter;Mangrovibacter_sp._WG-1	96.05	253	5e-117
denovo1502		3	0	0	0	0	0	3	X82290.1.1476_Bacteria;Proteobacteria;Alphaproteobacteria;Rhodospirillales;Acetobacteraceae;Gluconobacter;Gluconobacter_frateurii	98.41	251	4e-130
denovo1513		3	0	2	0	0	0	1	HM556852.1.1374_Bacteria;Proteobacteria;Gammaproteobacteria;Enterobacteriales;Enterobacteriaceae;Tatumella;uncultured_bacterium	97.63	253	2e-126
denovo1519		3	0	3	0	0	0	0	JN175342.1.1527_Bacteria;Proteobacteria;Gammaproteobacteria;Enterobacteriales;Enterobacteriaceae;Tatumella;Tatumella_punctata	96.84	253	9e-122
denovo153		3	0	2	0	1	0	0	GQ417303.1.1463_Bacteria;Proteobacteria;Gammaproteobacteria;Enterobacteriales;Enterobacteriaceae;Klebsiella;uncultured_Klebsiella_sp.	96.44	253	2e-119
denovo1535		3	0	1	0	1	0	1	JN175342.1.1527_Bacteria;Proteobacteria;Gammaproteobacteria;Enterobacteriales;Enterobacteriaceae;Tatumella;Tatumella_punctata	96.84	253	9e-122
denovo1644		3	0	0	0	0	0	3	X82290.1.1476_Bacteria;Proteobacteria;Alphaproteobacteria;Rhodospirillales;Acetobacteraceae;Gluconobacter;Gluconobacter_frateurii	97.63	253	2e-126
denovo1646		3	1	1	0	0	1	0	JF690979.1.1419_Bacteria;Proteobacteria;Gammaproteobacteria;Enterobacteriales;Enterobacteriaceae;Enterobacter;Enterobacter_ludwigii	96.05	253	5e-117
denovo1683		3	2	0	0	1	0	0	HQ787695.1.1459_Bacteria;Proteobacteria;Gammaproteobacteria;Enterobacteriales;Enterobacteriaceae;Enterobacter;uncultured_organism	96.84	253	9e-122
denovo1751		3	0	0	0	3	0	0	JF224426.1.1342_Bacteria;Actinobacteria;Actinobacteria;Corynebacteriales;Corynebacteriaceae;uncultured_bacterium	99.6	253	2e-138
denovo1755		3	0	2	0	0	1	0	JN175342.1.1527_Bacteria;Proteobacteria;Gammaproteobacteria;Enterobacteriales;Enterobacteriaceae;Tatumella;Tatumella_punctata	96.84	253	9e-122
denovo177		3	0	0	0	0	2	1	JN194132.1.1320_Bacteria;Proteobacteria;Gammaproteobacteria;Enterobacteriales;Enterobacteriaceae;Pantoea;bacterium_MPB_JP_b	96.44	253	2e-119
denovo1804		3	0	0	0	0	2	1	HM031970.1.1384_Bacteria;Bacteroidetes;Bacteroidia;Bacteroidales;Marinilabiaceae;Cytophaga_sp._UDC369	99.21	253	4e-136
denovo1940		3	0	0	0	3	0	0	JN409118.1.1409_Bacteria;Proteobacteria;Alphaproteobacteria;Sphingomonadales;Sphingomonadaceae;Sphingomonas;uncultured_alpha_proteobacterium	100	253	7e-141
denovo195		3	0	0	1	1	0	1	JN175342.1.1527_Bacteria;Proteobacteria;Gammaproteobacteria;Enterobacteriales;Enterobacteriaceae;Tatumella;Tatumella_punctata	96.84	253	9e-122
denovo1972		3	1	2	0	0	0	0	JN175342.1.1527_Bacteria;Proteobacteria;Gammaproteobacteria;Enterobacteriales;Enterobacteriaceae;Tatumella;Tatumella_punctata	96.84	253	9e-122
denovo1974		3	1	0	0	0	1	1	EF509905.1.1477_Bacteria;Proteobacteria;Gammaproteobacteria;Enterobacteriales;Enterobacteriaceae;Klebsiella;uncultured_bacterium	97.22	216	2e-104
denovo2004		3	1	1	0	0	0	1	JN990099.1.1503_Bacteria;Proteobacteria;Gammaproteobacteria;Enterobacteriales;Enterobacteriaceae;Enterobacter;uncultured_bacterium	97.23	253	4e-124
denovo2007		3	1	1	0	1	0	0	JN175342.1.1527_Bacteria;Proteobacteria;Gammaproteobacteria;Enterobacteriales;Enterobacteriaceae;Tatumella;Tatumella_punctata	96.8	250	6e-120
denovo2037		3	1	1	0	0	1	0	JN175342.1.1527_Bacteria;Proteobacteria;Gammaproteobacteria;Enterobacteriales;Enterobacteriaceae;Tatumella;Tatumella_punctata	96.84	253	9e-122
denovo205		3	1	1	0	0	1	0	HQ787611.1.1463_Bacteria;Proteobacteria;Gammaproteobacteria;Enterobacteriales;Enterobacteriaceae;Enterobacter;uncultured_organism	97.63	253	2e-126
denovo2066		3	0	0	0	0	0	3	X82290.1.1476_Bacteria;Proteobacteria;Alphaproteobacteria;Rhodospirillales;Acetobacteraceae;Gluconobacter;Gluconobacter_frateurii	97.63	253	2e-126
denovo2093		3	2	1	0	0	0	0	JN194132.1.1320_Bacteria;Proteobacteria;Gammaproteobacteria;Enterobacteriales;Enterobacteriaceae;Pantoea;bacterium_MPB_JP_b	95.65	253	1e-114
denovo2117		3	1	0	0	0	1	1	JN175342.1.1527_Bacteria;Proteobacteria;Gammaproteobacteria;Enterobacteriales;Enterobacteriaceae;Tatumella;Tatumella_punctata	96.84	253	9e-122
denovo2162		3	0	2	1	0	0	0	HM556474.1.1373_Bacteria;Proteobacteria;Gammaproteobacteria;Enterobacteriales;Enterobacteriaceae;Tatumella;uncultured_bacterium	98.02	253	5e-117
denovo2199	Archaea	3	0	0	0	0	0	3	EU731491.1.971_Archaea;Euryarchaeota;Halobacteria;Halobacteriales;Deep_Sea_Hydrothermal_Vent_Gp_6(DHVEG-6);Candidatus_Parvarchaeum;uncultured_euryarchaeote	96.06	254	1e-117
denovo220		3	0	2	0	0	1	0	JN990099.1.1503_Bacteria;Proteobacteria;Gammaproteobacteria;Enterobacteriales;Enterobacteriaceae;Enterobacter;uncultured_bacterium	98.02	253	6e-129
denovo2216		3	2	0	0	0	0	1	JN990099.1.1503_Bacteria;Proteobacteria;Gammaproteobacteria;Enterobacteriales;Enterobacteriaceae;Enterobacter;uncultured_bacterium	97.23	253	4e-124
denovo2220		3	1	0	0	0	2	0	JN175342.1.1527_Bacteria;Proteobacteria;Gammaproteobacteria;Enterobacteriales;Enterobacteriaceae;Tatumella;Tatumella_punctata	96.44	253	2e-119
denovo2286		3	0	0	1	0	1	1	JN175342.1.1527_Bacteria;Proteobacteria;Gammaproteobacteria;Enterobacteriales;Enterobacteriaceae;Tatumella;Tatumella_punctata	96.84	253	9e-122
denovo2315		3	0	1	0	0	1	1	HM556852.1.1374_Bacteria;Proteobacteria;Gammaproteobacteria;Enterobacteriales;Enterobacteriaceae;Tatumella;uncultured_bacterium	97.63	253	2e-126
denovo2332		3	0	2	0	0	0	1	JN175342.1.1527_Bacteria;Proteobacteria;Gammaproteobacteria;Enterobacteriales;Enterobacteriaceae;Tatumella;Tatumella_punctata	96.44	253	2e-119
denovo2414		3	0	1	0	1	0	1	Y12703.1.1430_Bacteria;Proteobacteria;Alphaproteobacteria;Rhodobacterales;Rhodobacteraceae;Paracoccus;Paracoccus_marcusii	100	253	7e-141
denovo2450		3	0	2	0	0	0	1	HM556852.1.1374_Bacteria;Proteobacteria;Gammaproteobacteria;Enterobacteriales;Enterobacteriaceae;Tatumella;uncultured_bacterium	96.84	253	9e-122
denovo2457		3	1	0	0	1	0	1	JN049601.1.1503_Bacteria;Proteobacteria;Gammaproteobacteria;Xanthomonadales;Xanthomonadaceae;Stenotrophomonas;Klebsiella_sp._Y6	97.23	253	4e-124
denovo2466		3	1	2	0	0	0	0	JN175342.1.1527_Bacteria;Proteobacteria;Gammaproteobacteria;Enterobacteriales;Enterobacteriaceae;Tatumella;Tatumella_punctata	96.84	253	8e-110
denovo2488		3	0	0	0	0	0	3	X82290.1.1476_Bacteria;Proteobacteria;Alphaproteobacteria;Rhodospirillales;Acetobacteraceae;Gluconobacter;Gluconobacter_frateurii	98.06	206	2e-103
denovo2512		3	0	3	0	0	0	0	JN175342.1.1527_Bacteria;Proteobacteria;Gammaproteobacteria;Enterobacteriales;Enterobacteriaceae;Tatumella;Tatumella_punctata	96.44	253	2e-119
denovo2515		3	0	0	0	0	0	3	JN217142.1.1504_Bacteria;Proteobacteria;Gammaproteobacteria;Acidithiobacillales;KCM-B-112;uncultured_bacterium	100	253	7e-141
denovo257		3	0	1	1	0	1	0	DQ991964.1.1484_Bacteria;Proteobacteria;Deltaproteobacteria;Desulfuromonadales;Desulfuromonadaceae;Pelobacter;Pelobacter_seleniigenes	98.42	253	3e-131
denovo2631	Chloroplast	3	0	3	0	0	0	0	GQ086624.1.1310_Bacteria;Cyanobacteria;Chloroplast;uncultured_eukaryote	98.02	253	6e-129
denovo2681		3	1	2	0	0	0	0	JN175342.1.1527_Bacteria;Proteobacteria;Gammaproteobacteria;Enterobacteriales;Enterobacteriaceae;Tatumella;Tatumella_punctata	96.84	253	9e-122
denovo2715		3	1	1	0	0	0	1	JN175342.1.1527_Bacteria;Proteobacteria;Gammaproteobacteria;Enterobacteriales;Enterobacteriaceae;Tatumella;Tatumella_punctata	96.44	253	2e-119
denovo2736		3	0	2	0	0	1	0	JN175342.1.1527_Bacteria;Proteobacteria;Gammaproteobacteria;Enterobacteriales;Enterobacteriaceae;Tatumella;Tatumella_punctata	96.44	253	2e-119
denovo2747		3	1	0	0	0	2	0	JN175342.1.1527_Bacteria;Proteobacteria;Gammaproteobacteria;Enterobacteriales;Enterobacteriaceae;Tatumella;Tatumella_punctata	96.84	253	9e-122
denovo2825		3	2	0	0	0	1	0	JN175342.1.1527_Bacteria;Proteobacteria;Gammaproteobacteria;Enterobacteriales;Enterobacteriaceae;Tatumella;Tatumella_punctata	96.84	253	9e-122
denovo2839		3	1	0	1	0	0	1	JN175342.1.1527_Bacteria;Proteobacteria;Gammaproteobacteria;Enterobacteriales;Enterobacteriaceae;Tatumella;Tatumella_punctata	96.05	253	5e-117
denovo2860		3	0	1	0	0	2	0	JN175342.1.1527_Bacteria;Proteobacteria;Gammaproteobacteria;Enterobacteriales;Enterobacteriaceae;Tatumella;Tatumella_punctata	96.84	253	9e-122
denovo2893		3	1	2	0	0	0	0	JN990099.1.1503_Bacteria;Proteobacteria;Gammaproteobacteria;Enterobacteriales;Enterobacteriaceae;Enterobacter;uncultured_bacterium	97.23	253	4e-124
denovo2930		3	2	0	0	0	1	0	JN175342.1.1527_Bacteria;Proteobacteria;Gammaproteobacteria;Enterobacteriales;Enterobacteriaceae;Tatumella;Tatumella_punctata	96.05	253	5e-117
denovo2938		3	1	2	0	0	0	0	JN175342.1.1527_Bacteria;Proteobacteria;Gammaproteobacteria;Enterobacteriales;Enterobacteriaceae;Tatumella;Tatumella_punctata	96.05	253	5e-117
denovo2956		3	0	1	0	0	1	1	JN175342.1.1527_Bacteria;Proteobacteria;Gammaproteobacteria;Enterobacteriales;Enterobacteriaceae;Tatumella;Tatumella_punctata	96.84	253	9e-122
denovo2962		3	0	3	0	0	0	0	HM008298.1.1503_Bacteria;Bacteroidetes;Bacteroidia;Bacteroidales;Porphyromonadaceae;Dysgonomonas;uncultured_bacterium	94.47	253	2e-107
denovo2992		3	0	2	0	0	0	1	HQ178705.1.1446_Bacteria;Bacteroidetes;Class_Incertae_Sedis;Order_Incertae_Sedis;Family_Incertae_Sedis;Prolixibacter;uncultured_bacterium	96.05	253	5e-117
denovo3025		3	1	2	0	0	0	0	JN175342.1.1527_Bacteria;Proteobacteria;Gammaproteobacteria;Enterobacteriales;Enterobacteriaceae;Tatumella;Tatumella_punctata	96.77	217	9e-103
denovo3054		3	0	1	0	0	1	1	JN175342.1.1527_Bacteria;Proteobacteria;Gammaproteobacteria;Enterobacteriales;Enterobacteriaceae;Tatumella;Tatumella_punctata	96.74	215	1e-101
denovo3089		3	0	0	0	1	1	1	JN990099.1.1503_Bacteria;Proteobacteria;Gammaproteobacteria;Enterobacteriales;Enterobacteriaceae;Enterobacter;uncultured_bacterium	96.84	253	9e-122
denovo3126		3	1	1	1	0	0	0	JF690979.1.1419_Bacteria;Proteobacteria;Gammaproteobacteria;Enterobacteriales;Enterobacteriaceae;Enterobacter;Enterobacter_ludwigii	96.84	253	9e-122
denovo3134		3	1	1	0	0	0	1	JN175342.1.1527_Bacteria;Proteobacteria;Gammaproteobacteria;Enterobacteriales;Enterobacteriaceae;Tatumella;Tatumella_punctata	96.84	253	9e-122
denovo3143		3	1	2	0	0	0	0	JN175342.1.1527_Bacteria;Proteobacteria;Gammaproteobacteria;Enterobacteriales;Enterobacteriaceae;Tatumella;Tatumella_punctata	96.84	253	9e-122
denovo3178	Chloroplast	3	0	0	0	0	3	0	GU451514.1.1210_Bacteria;Cyanobacteria;Chloroplast;uncultured_bacterium	99.02	204	6e-107
denovo3198		3	1	0	1	0	1	0	JN175342.1.1527_Bacteria;Proteobacteria;Gammaproteobacteria;Enterobacteriales;Enterobacteriaceae;Tatumella;Tatumella_punctata	96.84	253	9e-122
denovo3207		3	1	2	0	0	0	0	JN175342.1.1527_Bacteria;Proteobacteria;Gammaproteobacteria;Enterobacteriales;Enterobacteriaceae;Tatumella;Tatumella_punctata	96.84	253	9e-122
denovo3214		3	0	2	0	1	0	0	HM556457.1.1373_Bacteria;Proteobacteria;Gammaproteobacteria;Enterobacteriales;Enterobacteriaceae;Tatumella;uncultured_bacterium	97.63	253	2e-126
denovo332		3	0	0	0	3	0	0	EU703322.1.1404_Bacteria;Planctomycetes;Planctomycetacia;Planctomycetales;Planctomycetaceae;Rhodopirellula;uncultured_Planctomycetaceae_bacterium	97.63	253	2e-126
denovo3322		3	2	1	0	0	0	0	HQ916532.1.1405_Bacteria;Proteobacteria;Gammaproteobacteria;Order_Incertae_Sedis;Family_Incertae_Sedis;Thiohalophilus;uncultured_bacterium	95.26	253	3e-112
denovo3333		3	0	0	0	1	2	0	JN175342.1.1527_Bacteria;Proteobacteria;Gammaproteobacteria;Enterobacteriales;Enterobacteriaceae;Tatumella;Tatumella_punctata	96.44	253	2e-119
denovo3344		3	0	1	0	0	1	1	JN194132.1.1320_Bacteria;Proteobacteria;Gammaproteobacteria;Enterobacteriales;Enterobacteriaceae;Pantoea;bacterium_MPB_JP_b	96.44	253	2e-119
denovo3374		3	2	1	0	0	0	0	JN175342.1.1527_Bacteria;Proteobacteria;Gammaproteobacteria;Enterobacteriales;Enterobacteriaceae;Tatumella;Tatumella_punctata	96.84	253	9e-122
denovo34		3	1	0	0	0	1	1	JN175342.1.1527_Bacteria;Proteobacteria;Gammaproteobacteria;Enterobacteriales;Enterobacteriaceae;Tatumella;Tatumella_punctata	96.73	214	6e-101
denovo3417		3	0	1	0	0	0	2	Z96078.1.1495_Bacteria;Proteobacteria;Gammaproteobacteria;Enterobacteriales;Enterobacteriaceae;Enterobacter;Enterobacter_cancerogenus	95.26	253	3e-100
denovo3451		3	0	3	0	0	0	0	EU652511.1.1499_Bacteria;Proteobacteria;Gammaproteobacteria;Xanthomonadales;Sinobacteraceae;JTB255_marine_benthic_group;uncultured_bacterium	95.26	253	3e-112
denovo3458		3	1	1	0	1	0	0	HM556852.1.1374_Bacteria;Proteobacteria;Gammaproteobacteria;Enterobacteriales;Enterobacteriaceae;Tatumella;uncultured_bacterium	97.63	253	2e-126
denovo3460		3	0	1	1	0	0	1	HM556852.1.1374_Bacteria;Proteobacteria;Gammaproteobacteria;Enterobacteriales;Enterobacteriaceae;Tatumella;uncultured_bacterium	97.23	253	4e-124
denovo3469		3	0	3	0	0	0	0	EU236408.1.1422_Bacteria;Planctomycetes;OM190;uncultured_bacterium	96.84	253	9e-122
denovo349		3	2	1	0	0	0	0	JN175342.1.1527_Bacteria;Proteobacteria;Gammaproteobacteria;Enterobacteriales;Enterobacteriaceae;Tatumella;Tatumella_punctata	96.84	253	9e-122
denovo3512		3	0	2	0	0	1	0	JN194132.1.1320_Bacteria;Proteobacteria;Gammaproteobacteria;Enterobacteriales;Enterobacteriaceae;Pantoea;bacterium_MPB_JP_b	96.44	253	2e-119
denovo373		3	0	3	0	0	0	0	AB476288.1.1448_Bacteria;Bacteroidetes;Sphingobacteriia;Sphingobacteriales;Saprospiraceae;uncultured;uncultured_bacterium	100	253	7e-141
denovo389		3	1	1	0	0	1	0	JN175342.1.1527_Bacteria;Proteobacteria;Gammaproteobacteria;Enterobacteriales;Enterobacteriaceae;Tatumella;Tatumella_punctata	96.84	253	9e-122
denovo393		3	2	1	0	0	0	0	FN869544.1.1438_Bacteria;Proteobacteria;Gammaproteobacteria;Order_Incertae_Sedis;Family_Incertae_Sedis;Sedimenticola;Myrtea_flabelliformis_gill_endosymbiont	95.65	253	1e-114
denovo43		3	1	1	0	0	1	0	JN175342.1.1527_Bacteria;Proteobacteria;Gammaproteobacteria;Enterobacteriales;Enterobacteriaceae;Tatumella;Tatumella_punctata	96.39	249	5e-117
denovo472		3	2	0	0	0	0	1	JN175342.1.1527_Bacteria;Proteobacteria;Gammaproteobacteria;Enterobacteriales;Enterobacteriaceae;Tatumella;Tatumella_punctata	96.44	253	2e-119
denovo501		3	2	1	0	0	0	0	JN793873.1.1507_Bacteria;Proteobacteria;Gammaproteobacteria;Enterobacteriales;Enterobacteriaceae;Tatumella;uncultured_Enterobacteriaceae_bacterium	96.44	253	2e-119
denovo503		3	0	2	0	1	0	0	JN175342.1.1527_Bacteria;Proteobacteria;Gammaproteobacteria;Enterobacteriales;Enterobacteriaceae;Tatumella;Tatumella_punctata	96.44	253	2e-119
denovo58		3	0	0	0	0	0	3	JF241513.1.1339_Bacteria;Actinobacteria;Actinobacteria;Corynebacteriales;Corynebacteriaceae;Corynebacterium;uncultured_bacterium	100	254	2e-141
denovo621		3	1	1	0	0	0	1	JN175342.1.1527_Bacteria;Proteobacteria;Gammaproteobacteria;Enterobacteriales;Enterobacteriaceae;Tatumella;Tatumella_punctata	96.84	253	9e-122
denovo624		3	0	0	0	0	3	0	GQ246365.1.1516_Bacteria;Planctomycetes;Planctomycetacia;Planctomycetales;Planctomycetaceae;uncultured;uncultured_bacterium	98.81	253	1e-133
denovo629		3	1	1	1	0	0	0	EU259795.1.1491_Bacteria;Bacteroidetes;Flavobacteria;Flavobacteriales;Flavobacteriaceae;NS5_marine_group;uncultured_bacterium	98.81	253	1e-133
denovo64		3	1	1	0	0	1	0	JF344655.1.1521_Bacteria;Proteobacteria;Deltaproteobacteria;Desulfobacterales;Desulfobacteraceae;Sva0081_sediment_group;uncultured_delta_proteobacterium	99.18	245	2e-131
denovo657		3	0	3	0	0	0	0	DQ351755.1.1518_Bacteria;Proteobacteria;Deltaproteobacteria;Desulfobacterales;Desulfobulbaceae;uncultured;uncultured_delta_proteobacterium	100	253	7e-141
denovo674		3	2	1	0	0	0	0	JN175342.1.1527_Bacteria;Proteobacteria;Gammaproteobacteria;Enterobacteriales;Enterobacteriaceae;Tatumella;Tatumella_punctata	96.44	253	2e-119
denovo707		3	0	0	0	1	1	1	AM997714.1.1501_Bacteria;Proteobacteria;Gammaproteobacteria;Xanthomonadales;Sinobacteraceae;JTB255_marine_benthic_group;uncultured_deep-sea_bacterium	98.81	253	1e-133
denovo759		3	0	2	0	0	1	0	JF706534.1.1396_Bacteria;Proteobacteria;Gammaproteobacteria;Enterobacteriales;Enterobacteriaceae;Erwinia;Erwinia_rhapontici	96.84	253	9e-122
denovo788		3	0	2	0	1	0	0	JN175342.1.1527_Bacteria;Proteobacteria;Gammaproteobacteria;Enterobacteriales;Enterobacteriaceae;Tatumella;Tatumella_punctata	96.84	253	9e-122
denovo803		3	0	1	0	1	1	0	JN175342.1.1527_Bacteria;Proteobacteria;Gammaproteobacteria;Enterobacteriales;Enterobacteriaceae;Tatumella;Tatumella_punctata	96.05	253	5e-117
denovo854		3	1	1	1	0	0	0	JN175342.1.1527_Bacteria;Proteobacteria;Gammaproteobacteria;Enterobacteriales;Enterobacteriaceae;Tatumella;Tatumella_punctata	96.05	253	5e-117
denovo866	Chloroplast	3	0	2	0	0	1	0	EU016845.1.1492_Bacteria;Cyanobacteria;Chloroplast;Cycas_micronesica	98.02	253	6e-129
denovo898		3	0	3	0	0	0	0	FJ813515.1.1449_Bacteria;Chloroflexi;Anaerolineae;Anaerolineales;Anaerolineaceae;uncultured;uncultured_bacterium	95.26	253	3e-112
denovo935		3	2	1	0	0	0	0	JN175342.1.1527_Bacteria;Proteobacteria;Gammaproteobacteria;Enterobacteriales;Enterobacteriaceae;Tatumella;Tatumella_punctata	96.84	253	9e-122
denovo960		3	0	2	0	0	0	1	JN990099.1.1503_Bacteria;Proteobacteria;Gammaproteobacteria;Enterobacteriales;Enterobacteriaceae;Enterobacter;uncultured_bacterium	96.05	253	5e-117
denovo996		3	2	1	0	0	0	0	JN175342.1.1527_Bacteria;Proteobacteria;Gammaproteobacteria;Enterobacteriales;Enterobacteriaceae;Tatumella;Tatumella_punctata	96.84	253	9e-122
denovo999		3	0	2	0	0	0	1	JN175342.1.1527_Bacteria;Proteobacteria;Gammaproteobacteria;Enterobacteriales;Enterobacteriaceae;Tatumella;Tatumella_punctata	96.84	253	9e-122
denovo1		2	0	1	0	0	1	0	JF690979.1.1419_Bacteria;Proteobacteria;Gammaproteobacteria;Enterobacteriales;Enterobacteriaceae;Enterobacter;Enterobacter_ludwigii	97.23	253	4e-124
denovo10		2	0	1	0	0	1	0	HM558240.1.1372_Bacteria;Proteobacteria;Gammaproteobacteria;Enterobacteriales;Enterobacteriaceae;Tatumella;uncultured_bacterium	97.23	253	4e-124
denovo1000		2	2	0	0	0	0	0	JN175342.1.1527_Bacteria;Proteobacteria;Gammaproteobacteria;Enterobacteriales;Enterobacteriaceae;Tatumella;Tatumella_punctata	95.12	246	5e-108
denovo1022		2	0	0	0	0	2	0	AY114313.1.1410_Bacteria;Candidate_division_WS3;uncultured_candidate_division_WS3_bacterium	99.21	253	1e-133
denovo1027		2	1	1	0	0	0	0	JN175342.1.1527_Bacteria;Proteobacteria;Gammaproteobacteria;Enterobacteriales;Enterobacteriaceae;Tatumella;Tatumella_punctata	96.72	244	2e-116
denovo1050		2	1	0	0	0	1	0	JN175342.1.1527_Bacteria;Proteobacteria;Gammaproteobacteria;Enterobacteriales;Enterobacteriaceae;Tatumella;Tatumella_punctata	96.44	253	2e-119
denovo1054		2	1	0	0	1	0	0	JN049601.1.1503_Bacteria;Proteobacteria;Gammaproteobacteria;Xanthomonadales;Xanthomonadaceae;Stenotrophomonas;Klebsiella_sp._Y6	94.86	253	8e-110
denovo1057		2	0	1	0	0	1	0	HM558240.1.1372_Bacteria;Proteobacteria;Gammaproteobacteria;Enterobacteriales;Enterobacteriaceae;Tatumella;uncultured_bacterium	96.84	253	9e-122
denovo1064		2	0	2	0	0	0	0	JF706534.1.1396_Bacteria;Proteobacteria;Gammaproteobacteria;Enterobacteriales;Enterobacteriaceae;Erwinia;Erwinia_rhapontici	96.84	253	9e-122
denovo1070		2	1	1	0	0	0	0	JN194132.1.1320_Bacteria;Proteobacteria;Gammaproteobacteria;Enterobacteriales;Enterobacteriaceae;Pantoea;bacterium_MPB_JP_b	96.84	253	9e-122
denovo1071		2	1	1	0	0	0	0	JN977206.1.1534_Bacteria;Proteobacteria;Deltaproteobacteria;Desulfobacterales;Desulfobulbaceae;uncultured;uncultured_bacterium	94.33	194	2e-79
denovo1089		2	1	1	0	0	0	0	JN175342.1.1527_Bacteria;Proteobacteria;Gammaproteobacteria;Enterobacteriales;Enterobacteriaceae;Tatumella;Tatumella_punctata	95.26	253	3e-112
denovo1110		2	1	0	0	1	0	0	JF706534.1.1396_Bacteria;Proteobacteria;Gammaproteobacteria;Enterobacteriales;Enterobacteriaceae;Erwinia;Erwinia_rhapontici	95.65	253	1e-114
denovo1117		2	0	2	0	0	0	0	FJ203616.1.1459_Bacteria;Planctomycetes;Planctomycetacia;Planctomycetales;Planctomycetaceae;Blastopirellula;uncultured_bacterium	98.02	253	6e-129
denovo1122		2	1	1	0	0	0	0	JN613470.1.1451_Bacteria;Proteobacteria;Gammaproteobacteria;Enterobacteriales;Enterobacteriaceae;Enterobacter;Leclercia_sp._O-NR2	98.02	253	6e-129
denovo1125		2	0	2	0	0	0	0	JN175342.1.1527_Bacteria;Proteobacteria;Gammaproteobacteria;Enterobacteriales;Enterobacteriaceae;Tatumella;Tatumella_punctata	95.65	253	1e-114
denovo1131		2	1	0	1	0	0	0	AB468957.1.1487_Bacteria;Proteobacteria;Gammaproteobacteria;Order_Incertae_Sedis;Family_Incertae_Sedis;Thioprofundum;Thioprofundum_lithotrophica	95.65	253	1e-114
denovo1153		2	1	1	0	0	0	0	HQ671966.1.1464_Bacteria;Proteobacteria;Deltaproteobacteria;Sh765B-TzT-29;uncultured_bacterium	100	253	7e-141
denovo1156		2	0	1	0	1	0	0	JF706534.1.1396_Bacteria;Proteobacteria;Gammaproteobacteria;Enterobacteriales;Enterobacteriaceae;Erwinia;Erwinia_rhapontici	96.05	253	5e-117
denovo1179		2	0	1	1	0	0	0	FJ535299.1.1362_Bacteria;Proteobacteria;Gammaproteobacteria;BD7-8_marine_group;uncultured_bacterium	96.05	253	5e-117
denovo1182		2	1	0	0	0	0	1	JN175342.1.1527_Bacteria;Proteobacteria;Gammaproteobacteria;Enterobacteriales;Enterobacteriaceae;Tatumella;Tatumella_punctata	95.26	253	3e-112
denovo1204	Chloroplast	2	0	0	0	0	2	0	JQ088178.113095.114562_Bacteria;Cyanobacteria;Chloroplast;Synedra_acus	98.02	253	6e-129
denovo1205		2	0	0	0	0	2	0	JF690979.1.1419_Bacteria;Proteobacteria;Gammaproteobacteria;Enterobacteriales;Enterobacteriaceae;Enterobacter;Enterobacter_ludwigii	97.23	253	4e-124
denovo1227		2	1	0	0	0	0	1	X94099.1.1436_Bacteria;Proteobacteria;Alphaproteobacteria;Sphingomonadales;Sphingomonadaceae;Sphingobium;Sphingomonas_sp.	99.6	253	2e-138
denovo1233		2	0	1	1	0	0	0	JN175342.1.1527_Bacteria;Proteobacteria;Gammaproteobacteria;Enterobacteriales;Enterobacteriaceae;Tatumella;Tatumella_punctata	95.26	253	3e-112
denovo1238		2	0	0	0	0	1	1	JN175342.1.1527_Bacteria;Proteobacteria;Gammaproteobacteria;Enterobacteriales;Enterobacteriaceae;Tatumella;Tatumella_punctata	95.65	253	1e-114
denovo1244		2	1	1	0	0	0	0	JN175342.1.1527_Bacteria;Proteobacteria;Gammaproteobacteria;Enterobacteriales;Enterobacteriaceae;Tatumella;Tatumella_punctata	96.05	253	5e-117
denovo1251		2	0	0	0	0	0	2	JN175342.1.1527_Bacteria;Proteobacteria;Gammaproteobacteria;Enterobacteriales;Enterobacteriaceae;Tatumella;Tatumella_punctata	95.39	217	1e-95
denovo1290		2	0	0	0	2	0	0	X80775.1.1448_Bacteria;Proteobacteria;Alphaproteobacteria;Rhodospirillales;Acetobacteraceae;Gluconobacter;Gluconobacter_cerinus	96.84	253	9e-122
denovo1293		2	1	1	0	0	0	0	GQ417303.1.1463_Bacteria;Proteobacteria;Gammaproteobacteria;Enterobacteriales;Enterobacteriaceae;Klebsiella;uncultured_Klebsiella_sp.	97.23	253	4e-124
denovo1296		2	1	0	0	0	1	0	JN175342.1.1527_Bacteria;Proteobacteria;Gammaproteobacteria;Enterobacteriales;Enterobacteriaceae;Tatumella;Tatumella_punctata	96.05	253	5e-117
denovo1297		2	1	1	0	0	0	0	JN175342.1.1527_Bacteria;Proteobacteria;Gammaproteobacteria;Enterobacteriales;Enterobacteriaceae;Tatumella;Tatumella_punctata	96.44	253	2e-119
denovo1313		2	0	1	0	1	0	0	FJ404760.1.1489_Bacteria;Proteobacteria;Gammaproteobacteria;Enterobacteriales;Enterobacteriaceae;Enterobacter;Mangrovibacter_sp._WG-1	96.44	253	2e-119
denovo132		2	0	1	1	0	0	0	FJ545463.1.1526_Bacteria;Proteobacteria;Gammaproteobacteria;Alteromonadales;Alteromonadaceae;Haliea;uncultured_bacterium	99.21	253	4e-136
denovo133		2	0	0	1	0	1	0	JN175342.1.1527_Bacteria;Proteobacteria;Gammaproteobacteria;Enterobacteriales;Enterobacteriaceae;Tatumella;Tatumella_punctata	96.84	253	9e-122
denovo1341		2	0	1	0	0	0	1	HM558240.1.1372_Bacteria;Proteobacteria;Gammaproteobacteria;Enterobacteriales;Enterobacteriaceae;Tatumella;uncultured_bacterium	97.23	253	4e-124
denovo1346		2	0	2	0	0	0	0	JN175342.1.1527_Bacteria;Proteobacteria;Gammaproteobacteria;Enterobacteriales;Enterobacteriaceae;Tatumella;Tatumella_punctata	95.65	253	1e-114
denovo1352		2	1	0	0	0	0	1	JN175342.1.1527_Bacteria;Proteobacteria;Gammaproteobacteria;Enterobacteriales;Enterobacteriaceae;Tatumella;Tatumella_punctata	96.84	253	9e-122
denovo1358		2	1	0	0	0	0	1	HQ120930.1.1516_Bacteria;Proteobacteria;Gammaproteobacteria;Xanthomonadales;Xanthomonadaceae;Pseudoxanthomonas;uncultured_bacterium	98.42	253	3e-131
denovo1368		2	2	0	0	0	0	0	GU145547.1.1476_Bacteria;Proteobacteria;Epsilonproteobacteria;Campylobacterales;Helicobacteraceae;Sulfurimonas;uncultured_bacterium	97.63	253	2e-126
denovo1372		2	0	0	0	2	0	0	JF690894.1.1491_Bacteria;Firmicutes;Bacilli;Lactobacillales;Leuconostocaceae;Weissella;Weissella_cibaria	99.6	253	2e-138
denovo1375		2	0	2	0	0	0	0	HM556852.1.1374_Bacteria;Proteobacteria;Gammaproteobacteria;Enterobacteriales;Enterobacteriaceae;Tatumella;uncultured_bacterium	96.44	253	2e-119
denovo1383		2	0	2	0	0	0	0	JN175342.1.1527_Bacteria;Proteobacteria;Gammaproteobacteria;Enterobacteriales;Enterobacteriaceae;Tatumella;Tatumella_punctata	96.44	253	2e-119
denovo1389		2	0	0	0	0	1	1	JN175342.1.1527_Bacteria;Proteobacteria;Gammaproteobacteria;Enterobacteriales;Enterobacteriaceae;Tatumella;Tatumella_punctata	96.84	253	9e-122
denovo139		2	0	0	0	0	0	2	X82290.1.1476_Bacteria;Proteobacteria;Alphaproteobacteria;Rhodospirillales;Acetobacteraceae;Gluconobacter;Gluconobacter_frateurii	97.23	253	4e-124
denovo1417		2	0	2	0	0	0	0	JN175342.1.1527_Bacteria;Proteobacteria;Gammaproteobacteria;Enterobacteriales;Enterobacteriaceae;Tatumella;Tatumella_punctata	95.65	253	1e-114
denovo1444		2	0	0	0	1	1	0	JF706534.1.1396_Bacteria;Proteobacteria;Gammaproteobacteria;Enterobacteriales;Enterobacteriaceae;Erwinia;Erwinia_rhapontici	95.26	253	3e-112
denovo1446		2	0	2	0	0	0	0	JN175342.1.1527_Bacteria;Proteobacteria;Gammaproteobacteria;Enterobacteriales;Enterobacteriaceae;Tatumella;Tatumella_punctata	96.84	253	9e-122
denovo1448		2	0	2	0	0	0	0	JF703600.1.1510_Bacteria;Proteobacteria;Gammaproteobacteria;Enterobacteriales;Enterobacteriaceae;Enterobacter;uncultured_Enterobacter_sp.	94.47	253	2e-95
denovo1458		2	2	0	0	0	0	0	JN175342.1.1527_Bacteria;Proteobacteria;Gammaproteobacteria;Enterobacteriales;Enterobacteriaceae;Tatumella;Tatumella_punctata	96.05	253	5e-117
denovo1467		2	0	0	0	0	2	0	EU386101.1.1478_Bacteria;Candidate_division_BRC1;uncultured_bacterium	92.95	241	9e-91
denovo1468		2	0	1	0	1	0	0	JN175342.1.1527_Bacteria;Proteobacteria;Gammaproteobacteria;Enterobacteriales;Enterobacteriaceae;Tatumella;Tatumella_punctata	96.79	218	2e-103
denovo1470		2	0	0	0	0	2	0	FJ517030.1.1492_Bacteria;Proteobacteria;Deltaproteobacteria;Myxococcales;Nannocystineae;uncultured;uncultured_delta_proteobacterium	97.63	253	2e-126
denovo1475		2	0	1	0	0	0	1	HM558240.1.1372_Bacteria;Proteobacteria;Gammaproteobacteria;Enterobacteriales;Enterobacteriaceae;Tatumella;uncultured_bacterium	97.23	253	4e-124
denovo1493	Chloroplast	2	0	1	0	0	1	0	GU119645.1.1373_Bacteria;Cyanobacteria;Chloroplast;uncultured_organism	97.63	253	2e-126
denovo1512		2	1	0	1	0	0	0	EU652537.1.1505_Bacteria;Proteobacteria;Gammaproteobacteria;Thiotrichales;Piscirickettsiaceae;uncultured;uncultured_bacterium	96.05	253	5e-117
denovo1516		2	1	1	0	0	0	0	GU145547.1.1476_Bacteria;Proteobacteria;Epsilonproteobacteria;Campylobacterales;Helicobacteraceae;Sulfurimonas;uncultured_bacterium	98.42	253	3e-131
denovo1539		2	0	0	0	1	0	1	JN990099.1.1503_Bacteria;Proteobacteria;Gammaproteobacteria;Enterobacteriales;Enterobacteriaceae;Enterobacter;uncultured_bacterium	96.44	253	2e-119
denovo1551		2	1	0	0	1	0	0	JN175342.1.1527_Bacteria;Proteobacteria;Gammaproteobacteria;Enterobacteriales;Enterobacteriaceae;Tatumella;Tatumella_punctata	96.44	253	2e-119
denovo156		2	0	0	0	0	2	0	AB330881.1.1463_Bacteria;Proteobacteria;Gammaproteobacteria;Oceanospirillales;Oceanospirillaceae;Amphritea;Amphritea_japonica	100	253	7e-141
denovo1566		2	0	0	0	0	1	1	JF706534.1.1396_Bacteria;Proteobacteria;Gammaproteobacteria;Enterobacteriales;Enterobacteriaceae;Erwinia;Erwinia_rhapontici	96.05	253	5e-117
denovo1576		2	1	1	0	0	0	0	JN990099.1.1503_Bacteria;Proteobacteria;Gammaproteobacteria;Enterobacteriales;Enterobacteriaceae;Enterobacter;uncultured_bacterium	96.05	253	5e-117
denovo1578		2	0	2	0	0	0	0	GQ246347.1.1508_Bacteria;Planctomycetes;OM190;uncultured_bacterium	97.63	253	2e-126
denovo1579		2	0	0	0	0	1	1	JN175342.1.1527_Bacteria;Proteobacteria;Gammaproteobacteria;Enterobacteriales;Enterobacteriaceae;Tatumella;Tatumella_punctata	96.84	253	9e-122
denovo1582		2	1	1	0	0	0	0	JN175342.1.1527_Bacteria;Proteobacteria;Gammaproteobacteria;Enterobacteriales;Enterobacteriaceae;Tatumella;Tatumella_punctata	96.44	253	2e-119
denovo1589		2	2	0	0	0	0	0	X70953.1.1555_Bacteria;Proteobacteria;Deltaproteobacteria;Desulfobacterales;Desulfobacteraceae;Desulfobacula;Desulfobacula_toluolica	96.84	253	9e-122
denovo1601		2	1	1	0	0	0	0	JN175342.1.1527_Bacteria;Proteobacteria;Gammaproteobacteria;Enterobacteriales;Enterobacteriaceae;Tatumella;Tatumella_punctata	96.84	253	9e-122
denovo1624		2	0	0	1	0	0	1	JN175342.1.1527_Bacteria;Proteobacteria;Gammaproteobacteria;Enterobacteriales;Enterobacteriaceae;Tatumella;Tatumella_punctata	96.44	253	2e-119
denovo1645		2	2	0	0	0	0	0	JN175342.1.1527_Bacteria;Proteobacteria;Gammaproteobacteria;Enterobacteriales;Enterobacteriaceae;Tatumella;Tatumella_punctata	96.05	253	5e-117
denovo1650		2	0	1	0	0	0	1	JN175342.1.1527_Bacteria;Proteobacteria;Gammaproteobacteria;Enterobacteriales;Enterobacteriaceae;Tatumella;Tatumella_punctata	96.05	253	5e-117
denovo1667		2	0	2	0	0	0	0	HQ787611.1.1463_Bacteria;Proteobacteria;Gammaproteobacteria;Enterobacteriales;Enterobacteriaceae;Enterobacter;uncultured_organism	96.44	253	2e-119
denovo1670		2	0	1	0	1	0	0	JN990099.1.1503_Bacteria;Proteobacteria;Gammaproteobacteria;Enterobacteriales;Enterobacteriaceae;Enterobacter;uncultured_bacterium	95.26	253	3e-112
denovo1674		2	0	0	0	0	1	1	JN175342.1.1527_Bacteria;Proteobacteria;Gammaproteobacteria;Enterobacteriales;Enterobacteriaceae;Tatumella;Tatumella_punctata	95.2	250	2e-98
denovo1690		2	1	0	0	0	0	1	JN175342.1.1527_Bacteria;Proteobacteria;Gammaproteobacteria;Enterobacteriales;Enterobacteriaceae;Tatumella;Tatumella_punctata	96.77	217	9e-103
denovo1695		2	0	1	0	0	0	1	JN175342.1.1527_Bacteria;Proteobacteria;Gammaproteobacteria;Enterobacteriales;Enterobacteriaceae;Tatumella;Tatumella_punctata	96.05	253	5e-117
denovo17		2	0	0	1	0	0	1	JN175342.1.1527_Bacteria;Proteobacteria;Gammaproteobacteria;Enterobacteriales;Enterobacteriaceae;Tatumella;Tatumella_punctata	96.84	253	9e-122
denovo1714		2	0	0	0	0	0	2	X82290.1.1476_Bacteria;Proteobacteria;Alphaproteobacteria;Rhodospirillales;Acetobacteraceae;Gluconobacter;Gluconobacter_frateurii	97.23	253	4e-124
denovo1722		2	0	2	0	0	0	0	HM798995.1.1372_Bacteria;Planctomycetes;OM190;uncultured_planctomycete	97.29	221	2e-107
denovo1739		2	0	0	1	0	1	0	JN175342.1.1527_Bacteria;Proteobacteria;Gammaproteobacteria;Enterobacteriales;Enterobacteriaceae;Tatumella;Tatumella_punctata	97.2	250	2e-110
denovo1746		2	0	1	0	0	1	0	JN977206.1.1534_Bacteria;Proteobacteria;Deltaproteobacteria;Desulfobacterales;Desulfobulbaceae;uncultured;uncultured_bacterium	93.68	253	1e-102
denovo1763		2	1	0	0	0	0	1	HQ916532.1.1405_Bacteria;Proteobacteria;Gammaproteobacteria;Order_Incertae_Sedis;Family_Incertae_Sedis;Thiohalophilus;uncultured_bacterium	94.47	253	2e-107
denovo1773		2	0	1	0	0	1	0	JN049601.1.1503_Bacteria;Proteobacteria;Gammaproteobacteria;Xanthomonadales;Xanthomonadaceae;Stenotrophomonas;Klebsiella_sp._Y6	96.05	253	5e-117
denovo1778		2	0	1	0	0	0	1	JN175342.1.1527_Bacteria;Proteobacteria;Gammaproteobacteria;Enterobacteriales;Enterobacteriaceae;Tatumella;Tatumella_punctata	96.84	253	9e-122
denovo1782		2	0	2	0	0	0	0	FN396675.1.1403_Bacteria;Bacteroidetes;Bacteroidia;Bacteroidales;Marinilabiaceae;uncultured;uncultured_marine_bacterium	100	253	7e-141
denovo1793		2	0	1	0	0	1	0	DQ068818.1.1506_Bacteria;Proteobacteria;Gammaproteobacteria;Enterobacteriales;Enterobacteriaceae;Citrobacter;uncultured_bacterium	97.63	253	2e-126
denovo1800		2	0	2	0	0	0	0	JF690979.1.1419_Bacteria;Proteobacteria;Gammaproteobacteria;Enterobacteriales;Enterobacteriaceae;Enterobacter;Enterobacter_ludwigii	96.84	253	9e-122
denovo1806		2	0	1	0	1	0	0	JN175342.1.1527_Bacteria;Proteobacteria;Gammaproteobacteria;Enterobacteriales;Enterobacteriaceae;Tatumella;Tatumella_punctata	95.65	253	1e-114
denovo1819		2	0	0	1	0	0	1	HQ190985.1.1495_Bacteria;Proteobacteria;Gammaproteobacteria;HOC36;uncultured_sediment_bacterium	97.71	218	4e-108
denovo1838		2	1	0	0	1	0	0	JN175342.1.1527_Bacteria;Proteobacteria;Gammaproteobacteria;Enterobacteriales;Enterobacteriaceae;Tatumella;Tatumella_punctata	96.05	253	5e-117
denovo1843		2	0	0	0	1	1	0	JN175342.1.1527_Bacteria;Proteobacteria;Gammaproteobacteria;Enterobacteriales;Enterobacteriaceae;Tatumella;Tatumella_punctata	96.44	253	2e-119
denovo1853		2	0	2	0	0	0	0	JN175342.1.1527_Bacteria;Proteobacteria;Gammaproteobacteria;Enterobacteriales;Enterobacteriaceae;Tatumella;Tatumella_punctata	96.44	253	2e-119
denovo1854		2	2	0	0	0	0	0	EF509905.1.1477_Bacteria;Proteobacteria;Gammaproteobacteria;Enterobacteriales;Enterobacteriaceae;Klebsiella;uncultured_bacterium	96.44	253	2e-119
denovo1883		2	2	0	0	0	0	0	JN175342.1.1527_Bacteria;Proteobacteria;Gammaproteobacteria;Enterobacteriales;Enterobacteriaceae;Tatumella;Tatumella_punctata	96.84	253	9e-122
denovo1890		2	0	0	1	0	1	0	JN175342.1.1527_Bacteria;Proteobacteria;Gammaproteobacteria;Enterobacteriales;Enterobacteriaceae;Tatumella;Tatumella_punctata	96.44	253	2e-119
denovo1892		2	0	1	1	0	0	0	JN175342.1.1527_Bacteria;Proteobacteria;Gammaproteobacteria;Enterobacteriales;Enterobacteriaceae;Tatumella;Tatumella_punctata	96.84	253	9e-122
denovo1895		2	0	2	0	0	0	0	JN613470.1.1451_Bacteria;Proteobacteria;Gammaproteobacteria;Enterobacteriales;Enterobacteriaceae;Enterobacter;Leclercia_sp._O-NR2	97.63	253	2e-126
denovo1899		2	1	1	0	0	0	0	JN175342.1.1527_Bacteria;Proteobacteria;Gammaproteobacteria;Enterobacteriales;Enterobacteriaceae;Tatumella;Tatumella_punctata	96.05	253	5e-117
denovo1922		2	1	0	1	0	0	0	X84979.1.1502_Bacteria;Proteobacteria;Gammaproteobacteria;Order_Incertae_Sedis;Family_Incertae_Sedis;Sedimenticola;Codakia_orbicularis_gill_symbiont	96.84	253	9e-122
denovo1928		2	1	1	0	0	0	0	JN990099.1.1503_Bacteria;Proteobacteria;Gammaproteobacteria;Enterobacteriales;Enterobacteriaceae;Enterobacter;uncultured_bacterium	96.05	253	5e-117
denovo1956		2	1	1	0	0	0	0	EF187250.1.1380_Bacteria;Proteobacteria;Gammaproteobacteria;Pasteurellales;Pasteurellaceae;Orbus;Pasteurellaceae_bacterium_LvLi2	99.6	253	2e-138
denovo1964		2	0	2	0	0	0	0	JN175342.1.1527_Bacteria;Proteobacteria;Gammaproteobacteria;Enterobacteriales;Enterobacteriaceae;Tatumella;Tatumella_punctata	96.05	253	5e-117
denovo1966		2	0	1	0	1	0	0	JN977206.1.1534_Bacteria;Proteobacteria;Deltaproteobacteria;Desulfobacterales;Desulfobulbaceae;uncultured;uncultured_bacterium	97.23	253	4e-124
denovo1979		2	0	1	1	0	0	0	HM558240.1.1372_Bacteria;Proteobacteria;Gammaproteobacteria;Enterobacteriales;Enterobacteriaceae;Tatumella;uncultured_bacterium	97.23	253	4e-124
denovo198		2	0	0	0	1	0	1	X80678.1.1459_Bacteria;Proteobacteria;Gammaproteobacteria;Enterobacteriales;Enterobacteriaceae;Salmonella;Salmonella_enterica_subsp._enterica_serovar_Shomron	97.23	253	3e-112
denovo1995		2	0	2	0	0	0	0	HM556457.1.1373_Bacteria;Proteobacteria;Gammaproteobacteria;Enterobacteriales;Enterobacteriaceae;Tatumella;uncultured_bacterium	96.84	253	9e-122
denovo1997		2	1	0	0	0	1	0	JN175342.1.1527_Bacteria;Proteobacteria;Gammaproteobacteria;Enterobacteriales;Enterobacteriaceae;Tatumella;Tatumella_punctata	96.84	253	9e-122
denovo2		2	0	1	0	0	1	0	JN175342.1.1527_Bacteria;Proteobacteria;Gammaproteobacteria;Enterobacteriales;Enterobacteriaceae;Tatumella;Tatumella_punctata	96.44	253	2e-119
denovo2002		2	0	1	0	1	0	0	JN194132.1.1320_Bacteria;Proteobacteria;Gammaproteobacteria;Enterobacteriales;Enterobacteriaceae;Pantoea;bacterium_MPB_JP_b	94.86	253	8e-110
denovo2008		2	2	0	0	0	0	0	JN175342.1.1527_Bacteria;Proteobacteria;Gammaproteobacteria;Enterobacteriales;Enterobacteriaceae;Tatumella;Tatumella_punctata	96.44	253	2e-119
denovo2009		2	0	0	0	0	0	2	EU133447.1.1320_Bacteria;Proteobacteria;Alphaproteobacteria;Rhizobiales;Xanthobacteraceae;uncultured;uncultured_bacterium	99.6	253	2e-138
denovo2014		2	0	0	0	1	1	0	JQ318909.1.1370_Bacteria;Proteobacteria;Gammaproteobacteria;Enterobacteriales;Enterobacteriaceae;Erwinia;uncultured_Erwinia_sp.	96.84	253	9e-122
denovo2015		2	1	0	0	0	0	1	JF706534.1.1396_Bacteria;Proteobacteria;Gammaproteobacteria;Enterobacteriales;Enterobacteriaceae;Erwinia;Erwinia_rhapontici	97.23	253	4e-124
denovo2017		2	0	0	0	0	0	2	JN175342.1.1527_Bacteria;Proteobacteria;Gammaproteobacteria;Enterobacteriales;Enterobacteriaceae;Tatumella;Tatumella_punctata	96.05	253	5e-117
denovo2018		2	2	0	0	0	0	0	JF703600.1.1510_Bacteria;Proteobacteria;Gammaproteobacteria;Enterobacteriales;Enterobacteriaceae;Enterobacter;uncultured_Enterobacter_sp.	95.26	253	3e-100
denovo2028		2	0	0	1	0	1	0	JF706534.1.1396_Bacteria;Proteobacteria;Gammaproteobacteria;Enterobacteriales;Enterobacteriaceae;Erwinia;Erwinia_rhapontici	97.19	249	9e-122
denovo2039		2	0	0	0	1	1	0	JN175342.1.1527_Bacteria;Proteobacteria;Gammaproteobacteria;Enterobacteriales;Enterobacteriaceae;Tatumella;Tatumella_punctata	96.84	253	9e-122
denovo2054		2	1	1	0	0	0	0	Z96078.1.1495_Bacteria;Proteobacteria;Gammaproteobacteria;Enterobacteriales;Enterobacteriaceae;Enterobacter;Enterobacter_cancerogenus	95.26	253	3e-100
denovo206		2	0	0	1	1	0	0	JN175342.1.1527_Bacteria;Proteobacteria;Gammaproteobacteria;Enterobacteriales;Enterobacteriaceae;Tatumella;Tatumella_punctata	97.2	250	2e-122
denovo2065		2	2	0	0	0	0	0	JN175342.1.1527_Bacteria;Proteobacteria;Gammaproteobacteria;Enterobacteriales;Enterobacteriaceae;Tatumella;Tatumella_punctata	96.44	253	2e-119
denovo2069		2	0	1	1	0	0	0	FJ905639.1.1427_Bacteria;Proteobacteria;Deltaproteobacteria;Desulfobacterales;Desulfobulbaceae;SEEP-SRB4;uncultured_bacterium	98.42	253	3e-131
denovo2081		2	0	0	0	0	0	2	AB540148.1.1430_Bacteria;Proteobacteria;Alphaproteobacteria;Rhodospirillales;Acetobacteraceae;Gluconobacter;Gluconobacter_nephelii	98.02	253	6e-129
denovo2088		2	0	2	0	0	0	0	JN514281.1.1494_Bacteria;Planctomycetes;vadinHA49;uncultured_organism	92.89	253	7e-98
denovo2098		2	1	0	0	0	1	0	X93216.1.1495_Bacteria;Proteobacteria;Gammaproteobacteria;Enterobacteriales;Enterobacteriaceae;Raoultella;Raoultella_planticola	96.35	192	7e-88
denovo2100		2	0	0	1	0	1	0	HM558240.1.1372_Bacteria;Proteobacteria;Gammaproteobacteria;Enterobacteriales;Enterobacteriaceae;Tatumella;uncultured_bacterium	97.2	250	2e-122
denovo2118		2	1	1	0	0	0	0	JN175342.1.1527_Bacteria;Proteobacteria;Gammaproteobacteria;Enterobacteriales;Enterobacteriaceae;Tatumella;Tatumella_punctata	96.05	253	5e-117
denovo2121		2	1	1	0	0	0	0	JF706534.1.1396_Bacteria;Proteobacteria;Gammaproteobacteria;Enterobacteriales;Enterobacteriaceae;Erwinia;Erwinia_rhapontici	96.05	253	5e-117
denovo2129		2	1	0	0	0	0	1	JN175342.1.1527_Bacteria;Proteobacteria;Gammaproteobacteria;Enterobacteriales;Enterobacteriaceae;Tatumella;Tatumella_punctata	96.44	253	2e-119
denovo2149		2	1	1	0	0	0	0	JN175342.1.1527_Bacteria;Proteobacteria;Gammaproteobacteria;Enterobacteriales;Enterobacteriaceae;Tatumella;Tatumella_punctata	96.84	253	9e-122
denovo2153		2	1	1	0	0	0	0	JN175342.1.1527_Bacteria;Proteobacteria;Gammaproteobacteria;Enterobacteriales;Enterobacteriaceae;Tatumella;Tatumella_punctata	96.84	253	9e-122
denovo2154		2	0	2	0	0	0	0	FJ264583.1.1524_Bacteria;Planctomycetes;Phycisphaerae;MSBL9;uncultured_bacterium	99.61	254	4e-139
denovo2161		2	1	0	0	0	1	0	EU491181.1.1474_Bacteria;Proteobacteria;Deltaproteobacteria;SAR324_clade(Marine_group_B);uncultured_bacterium	99.21	253	4e-136
denovo2177		2	1	0	0	0	1	0	JN175342.1.1527_Bacteria;Proteobacteria;Gammaproteobacteria;Enterobacteriales;Enterobacteriaceae;Tatumella;Tatumella_punctata	96.44	253	2e-119
denovo2182		2	1	0	0	0	0	1	GU584306.1.1398_Bacteria;Proteobacteria;Gammaproteobacteria;Thiotrichales;Piscirickettsiaceae;uncultured;uncultured_bacterium	98.02	253	6e-129
denovo219		2	0	1	0	0	0	1	JN175342.1.1527_Bacteria;Proteobacteria;Gammaproteobacteria;Enterobacteriales;Enterobacteriaceae;Tatumella;Tatumella_punctata	96.44	253	2e-107
denovo2196		2	0	0	0	0	1	1	JN175342.1.1527_Bacteria;Proteobacteria;Gammaproteobacteria;Enterobacteriales;Enterobacteriaceae;Tatumella;Tatumella_punctata	96.8	250	6e-120
denovo22		2	1	0	1	0	0	0	JN990099.1.1503_Bacteria;Proteobacteria;Gammaproteobacteria;Enterobacteriales;Enterobacteriaceae;Enterobacter;uncultured_bacterium	97.23	253	4e-124
denovo2201		2	1	1	0	0	0	0	JN175342.1.1527_Bacteria;Proteobacteria;Gammaproteobacteria;Enterobacteriales;Enterobacteriaceae;Tatumella;Tatumella_punctata	95.65	253	1e-114
denovo2207		2	1	0	0	0	1	0	JF344548.1.1461_Bacteria;Proteobacteria;Gammaproteobacteria;Chromatiales;Ectothiorhodospiraceae;Acidiferrobacter;uncultured_gamma_proteobacterium	97.59	249	4e-124
denovo2210		2	0	0	0	2	0	0	X80775.1.1448_Bacteria;Proteobacteria;Alphaproteobacteria;Rhodospirillales;Acetobacteraceae;Gluconobacter;Gluconobacter_cerinus	96.84	253	9e-122
denovo2218		2	0	1	0	1	0	0	HM124170.1.1515_Bacteria;Firmicutes;Bacilli;Lactobacillales;Carnobacteriaceae;Atopostipes;uncultured_bacterium	99.21	254	3e-134
denovo2228		2	1	0	0	0	0	1	JN175342.1.1527_Bacteria;Proteobacteria;Gammaproteobacteria;Enterobacteriales;Enterobacteriaceae;Tatumella;Tatumella_punctata	96.84	253	9e-122
denovo2229		2	1	1	0	0	0	0	JN175342.1.1527_Bacteria;Proteobacteria;Gammaproteobacteria;Enterobacteriales;Enterobacteriaceae;Tatumella;Tatumella_punctata	96.84	253	9e-122
denovo2234		2	0	1	0	0	0	1	JN175342.1.1527_Bacteria;Proteobacteria;Gammaproteobacteria;Enterobacteriales;Enterobacteriaceae;Tatumella;Tatumella_punctata	96.84	253	9e-122
denovo2236		2	0	0	0	1	0	1	JN175342.1.1527_Bacteria;Proteobacteria;Gammaproteobacteria;Enterobacteriales;Enterobacteriaceae;Tatumella;Tatumella_punctata	96.44	253	2e-119
denovo2238		2	0	1	0	0	0	1	JN175342.1.1527_Bacteria;Proteobacteria;Gammaproteobacteria;Enterobacteriales;Enterobacteriaceae;Tatumella;Tatumella_punctata	96.84	253	9e-122
denovo2264		2	0	2	0	0	0	0	JF344483.1.1521_Bacteria;Proteobacteria;Deltaproteobacteria;Desulfobacterales;Desulfobacteraceae;SEEP-SRB1;uncultured_delta_proteobacterium	95.26	253	3e-112
denovo2270		2	0	1	0	1	0	0	JN175342.1.1527_Bacteria;Proteobacteria;Gammaproteobacteria;Enterobacteriales;Enterobacteriaceae;Tatumella;Tatumella_punctata	96.05	253	5e-117
denovo2274		2	0	0	0	1	0	1	HM556852.1.1374_Bacteria;Proteobacteria;Gammaproteobacteria;Enterobacteriales;Enterobacteriaceae;Tatumella;uncultured_bacterium	94.86	253	8e-110
denovo2275		2	0	0	0	2	0	0	X80775.1.1448_Bacteria;Proteobacteria;Alphaproteobacteria;Rhodospirillales;Acetobacteraceae;Gluconobacter;Gluconobacter_cerinus	95.65	253	1e-114
denovo2284		2	2	0	0	0	0	0	JN175342.1.1527_Bacteria;Proteobacteria;Gammaproteobacteria;Enterobacteriales;Enterobacteriaceae;Tatumella;Tatumella_punctata	96.44	253	2e-119
denovo229		2	1	0	0	0	1	0	JN175342.1.1527_Bacteria;Proteobacteria;Gammaproteobacteria;Enterobacteriales;Enterobacteriaceae;Tatumella;Tatumella_punctata	96.84	253	9e-122
denovo2291		2	0	0	0	0	0	2	X74674.1.1460_Bacteria;Proteobacteria;Gammaproteobacteria;Aeromonadales;Aeromonadaceae;Aeromonas;Aeromonas_caviae	100	253	7e-141
denovo2292		2	1	0	0	0	1	0	AB189371.1.1535_Bacteria;Lentisphaerae;Lentisphaeria;R76-B128;uncultured_Verrucomicrobia_bacterium	99.6	253	2e-138
denovo2316		2	0	1	0	0	1	0	JN175342.1.1527_Bacteria;Proteobacteria;Gammaproteobacteria;Enterobacteriales;Enterobacteriaceae;Tatumella;Tatumella_punctata	96.44	253	2e-119
denovo2319		2	0	1	0	0	1	0	JN175342.1.1527_Bacteria;Proteobacteria;Gammaproteobacteria;Enterobacteriales;Enterobacteriaceae;Tatumella;Tatumella_punctata	94.86	253	8e-110
denovo2323		2	1	1	0	0	0	0	DQ011254.1.1445_Bacteria;Proteobacteria;Gammaproteobacteria;Enterobacteriales;Enterobacteriaceae;Enterobacter;uncultured_bacterium	95.65	253	1e-114
denovo2334		2	0	1	0	0	1	0	HM556940.1.1327_Bacteria;Proteobacteria;Gammaproteobacteria;Enterobacteriales;Enterobacteriaceae;Escherichia-Shigella;uncultured_bacterium	97.23	253	4e-124
denovo2364		2	1	0	0	0	1	0	JN175342.1.1527_Bacteria;Proteobacteria;Gammaproteobacteria;Enterobacteriales;Enterobacteriaceae;Tatumella;Tatumella_punctata	96.84	253	9e-122
denovo2366		2	1	1	0	0	0	0	JN175342.1.1527_Bacteria;Proteobacteria;Gammaproteobacteria;Enterobacteriales;Enterobacteriaceae;Tatumella;Tatumella_punctata	96.84	253	9e-122
denovo2383		2	0	0	0	0	0	2	AB468957.1.1487_Bacteria;Proteobacteria;Gammaproteobacteria;Order_Incertae_Sedis;Family_Incertae_Sedis;Thioprofundum;Thioprofundum_lithotrophica	96.84	253	9e-122
denovo2399		2	1	0	0	0	1	0	JN175342.1.1527_Bacteria;Proteobacteria;Gammaproteobacteria;Enterobacteriales;Enterobacteriaceae;Tatumella;Tatumella_punctata	96.84	253	9e-122
denovo2405		2	1	1	0	0	0	0	JN175342.1.1527_Bacteria;Proteobacteria;Gammaproteobacteria;Enterobacteriales;Enterobacteriaceae;Tatumella;Tatumella_punctata	96.05	253	5e-117
denovo2413		2	0	2	0	0	0	0	JN990099.1.1503_Bacteria;Proteobacteria;Gammaproteobacteria;Enterobacteriales;Enterobacteriaceae;Enterobacter;uncultured_bacterium	96.44	253	2e-119
denovo2430		2	0	0	1	1	0	0	JN175342.1.1527_Bacteria;Proteobacteria;Gammaproteobacteria;Enterobacteriales;Enterobacteriaceae;Tatumella;Tatumella_punctata	96.44	253	2e-119
denovo2440		2	2	0	0	0	0	0	JQ318909.1.1370_Bacteria;Proteobacteria;Gammaproteobacteria;Enterobacteriales;Enterobacteriaceae;Erwinia;uncultured_Erwinia_sp.	97.23	253	4e-124
denovo2445		2	0	0	0	0	0	2	GU808368.1.1506_Bacteria;Firmicutes;Bacilli;Lactobacillales;Leuconostocaceae;Fructobacillus;uncultured_bacterium	99.6	253	2e-138
denovo2446		2	0	1	0	0	1	0	JF706534.1.1396_Bacteria;Proteobacteria;Gammaproteobacteria;Enterobacteriales;Enterobacteriaceae;Erwinia;Erwinia_rhapontici	97.23	253	4e-124
denovo2451		2	0	1	0	0	1	0	JN175342.1.1527_Bacteria;Proteobacteria;Gammaproteobacteria;Enterobacteriales;Enterobacteriaceae;Tatumella;Tatumella_punctata	96.05	253	5e-117
denovo2453		2	0	2	0	0	0	0	JN175342.1.1527_Bacteria;Proteobacteria;Gammaproteobacteria;Enterobacteriales;Enterobacteriaceae;Tatumella;Tatumella_punctata	96.44	253	2e-119
denovo2462		2	0	1	0	0	1	0	JF703600.1.1510_Bacteria;Proteobacteria;Gammaproteobacteria;Enterobacteriales;Enterobacteriaceae;Enterobacter;uncultured_Enterobacter_sp.	97.63	253	2e-126
denovo2479		2	0	1	0	0	1	0	JN175342.1.1527_Bacteria;Proteobacteria;Gammaproteobacteria;Enterobacteriales;Enterobacteriaceae;Tatumella;Tatumella_punctata	95.26	253	3e-112
denovo2480		2	0	0	0	0	2	0	GU451626.1.1246_Bacteria;Proteobacteria;Gammaproteobacteria;34P16;uncultured_bacterium	96.84	253	9e-122
denovo2481		2	0	1	0	1	0	0	X80775.1.1448_Bacteria;Proteobacteria;Alphaproteobacteria;Rhodospirillales;Acetobacteraceae;Gluconobacter;Gluconobacter_cerinus	96.84	253	9e-122
denovo2482		2	1	0	0	1	0	0	HQ191022.1.1357_Bacteria;Proteobacteria;Candidatus_Thiobios;uncultured_sediment_bacterium	98.02	253	6e-129
denovo2499		2	0	2	0	0	0	0	JF706534.1.1396_Bacteria;Proteobacteria;Gammaproteobacteria;Enterobacteriales;Enterobacteriaceae;Erwinia;Erwinia_rhapontici	96.84	253	9e-122
denovo2505		2	0	0	0	0	0	2	JN175342.1.1527_Bacteria;Proteobacteria;Gammaproteobacteria;Enterobacteriales;Enterobacteriaceae;Tatumella;Tatumella_punctata	95.65	253	1e-114
denovo251		2	0	1	1	0	0	0	JN175342.1.1527_Bacteria;Proteobacteria;Gammaproteobacteria;Enterobacteriales;Enterobacteriaceae;Tatumella;Tatumella_punctata	95.26	253	3e-112
denovo2510		2	1	0	0	1	0	0	HM556474.1.1373_Bacteria;Proteobacteria;Gammaproteobacteria;Enterobacteriales;Enterobacteriaceae;Tatumella;uncultured_bacterium	96.88	192	3e-90
denovo2518		2	0	1	0	1	0	0	HM558240.1.1372_Bacteria;Proteobacteria;Gammaproteobacteria;Enterobacteriales;Enterobacteriaceae;Tatumella;uncultured_bacterium	96.84	253	8e-110
denovo2522		2	1	1	0	0	0	0	JN175342.1.1527_Bacteria;Proteobacteria;Gammaproteobacteria;Enterobacteriales;Enterobacteriaceae;Tatumella;Tatumella_punctata	95.65	253	1e-114
denovo2527		2	1	0	0	1	0	0	JN175342.1.1527_Bacteria;Proteobacteria;Gammaproteobacteria;Enterobacteriales;Enterobacteriaceae;Tatumella;Tatumella_punctata	96.84	253	9e-122
denovo2543		2	0	0	2	0	0	0	DQ269073.1.1411_Bacteria;Proteobacteria;Gammaproteobacteria;Alteromonadales;Alteromonadaceae;uncultured;uncultured_gamma_proteobacterium	96.84	253	9e-122
denovo2549		2	0	0	0	2	0	0	JF217190.1.1323_Bacteria;Cyanobacteria;SHA-109;uncultured_bacterium	100	253	7e-141
denovo2553		2	0	2	0	0	0	0	GQ246311.1.1516_Bacteria;Proteobacteria;Deltaproteobacteria;Sh765B-TzT-29;uncultured_bacterium	99.21	253	4e-136
denovo2557		2	1	1	0	0	0	0	JN990099.1.1503_Bacteria;Proteobacteria;Gammaproteobacteria;Enterobacteriales;Enterobacteriaceae;Enterobacter;uncultured_bacterium	97.23	253	4e-124
denovo2567		2	0	1	1	0	0	0	FM242212.1.1504_Bacteria;Proteobacteria;Gammaproteobacteria;uncultured_gamma_proteobacterium	94.86	253	8e-110
denovo2584		2	0	0	0	0	0	2	X82290.1.1476_Bacteria;Proteobacteria;Alphaproteobacteria;Rhodospirillales;Acetobacteraceae;Gluconobacter;Gluconobacter_frateurii	97.63	253	2e-126
denovo2589		2	0	2	0	0	0	0	JN175342.1.1527_Bacteria;Proteobacteria;Gammaproteobacteria;Enterobacteriales;Enterobacteriaceae;Tatumella;Tatumella_punctata	95.65	253	1e-114
denovo2601		2	0	1	1	0	0	0	JN175342.1.1527_Bacteria;Proteobacteria;Gammaproteobacteria;Enterobacteriales;Enterobacteriaceae;Tatumella;Tatumella_punctata	96.05	253	5e-117
denovo2603		2	0	0	0	2	0	0	HM558240.1.1372_Bacteria;Proteobacteria;Gammaproteobacteria;Enterobacteriales;Enterobacteriaceae;Tatumella;uncultured_bacterium	96.84	253	9e-122
denovo2618		2	1	0	0	0	1	0	JN175342.1.1527_Bacteria;Proteobacteria;Gammaproteobacteria;Enterobacteriales;Enterobacteriaceae;Tatumella;Tatumella_punctata	94.86	253	8e-110
denovo2634		2	0	1	0	0	1	0	FJ404760.1.1489_Bacteria;Proteobacteria;Gammaproteobacteria;Enterobacteriales;Enterobacteriaceae;Enterobacter;Mangrovibacter_sp._WG-1	95.26	253	3e-112
denovo2636		2	1	0	1	0	0	0	JN990099.1.1503_Bacteria;Proteobacteria;Gammaproteobacteria;Enterobacteriales;Enterobacteriaceae;Enterobacter;uncultured_bacterium	97.23	253	4e-124
denovo2648		2	0	0	2	0	0	0	FJ999729.1.1482_Bacteria;Deferribacteres;Deferribacteres;Deferribacterales;Family_Incertae_Sedis;Caldithrix;Caldithrix_palaeochoryensis	93.68	253	1e-102
denovo2663		2	0	0	0	0	1	1	JN175342.1.1527_Bacteria;Proteobacteria;Gammaproteobacteria;Enterobacteriales;Enterobacteriaceae;Tatumella;Tatumella_punctata	96.31	217	2e-100
denovo2668		2	0	0	2	0	0	0	AB530202.1.1500_Bacteria;Proteobacteria;Gammaproteobacteria;Thiotrichales;Thiotrichaceae;uncultured;uncultured_bacterium	96.44	253	2e-119
denovo2691		2	0	0	0	2	0	0	FJ658290.1.1236_Bacteria;Bacteroidetes;Flavobacteria;Flavobacteriales;Flavobacteriaceae;Wautersiella;uncultured_bacterium	99.6	253	2e-138
denovo2716		2	0	0	0	2	0	0	X80775.1.1448_Bacteria;Proteobacteria;Alphaproteobacteria;Rhodospirillales;Acetobacteraceae;Gluconobacter;Gluconobacter_cerinus	96.84	253	9e-122
denovo272		2	0	0	0	1	0	1	JN175342.1.1527_Bacteria;Proteobacteria;Gammaproteobacteria;Enterobacteriales;Enterobacteriaceae;Tatumella;Tatumella_punctata	96.44	253	2e-119
denovo2755		2	2	0	0	0	0	0	JN175342.1.1527_Bacteria;Proteobacteria;Gammaproteobacteria;Enterobacteriales;Enterobacteriaceae;Tatumella;Tatumella_punctata	96.44	253	2e-119
denovo2764		2	0	0	0	2	0	0	DQ811802.1.1539_Bacteria;Proteobacteria;Deltaproteobacteria;Desulfobacterales;Desulfobacteraceae;Sva0081_sediment_group;uncultured_delta_proteobacterium	97.63	253	2e-126
denovo2781		2	0	2	0	0	0	0	JN175342.1.1527_Bacteria;Proteobacteria;Gammaproteobacteria;Enterobacteriales;Enterobacteriaceae;Tatumella;Tatumella_punctata	95.65	253	1e-114
denovo2784		2	0	0	1	1	0	0	FM242212.1.1504_Bacteria;Proteobacteria;Gammaproteobacteria;uncultured_gamma_proteobacterium	94.47	253	2e-107
denovo2786		2	1	0	0	0	1	0	JN175342.1.1527_Bacteria;Proteobacteria;Gammaproteobacteria;Enterobacteriales;Enterobacteriaceae;Tatumella;Tatumella_punctata	94.86	253	8e-110
denovo2830		2	0	2	0	0	0	0	JN175342.1.1527_Bacteria;Proteobacteria;Gammaproteobacteria;Enterobacteriales;Enterobacteriaceae;Tatumella;Tatumella_punctata	96.84	253	9e-122
denovo2853		2	0	0	0	0	1	1	HQ787611.1.1463_Bacteria;Proteobacteria;Gammaproteobacteria;Enterobacteriales;Enterobacteriaceae;Enterobacter;uncultured_organism	97.23	253	4e-124
denovo2866		2	1	1	0	0	0	0	X80678.1.1459_Bacteria;Proteobacteria;Gammaproteobacteria;Enterobacteriales;Enterobacteriaceae;Salmonella;Salmonella_enterica_subsp._enterica_serovar_Shomron	97.23	253	4e-124
denovo2878		2	0	0	0	1	0	1	JN175342.1.1527_Bacteria;Proteobacteria;Gammaproteobacteria;Enterobacteriales;Enterobacteriaceae;Tatumella;Tatumella_punctata	96.44	253	2e-119
denovo2886		2	0	0	1	0	1	0	HM057807.1.1520_Bacteria;Proteobacteria;Gammaproteobacteria;Oceanospirillales;SAR86_clade;uncultured_gamma_proteobacterium	100	253	7e-141
denovo2900		2	0	0	0	2	0	0	JN846928.1.1403_Bacteria;Proteobacteria;Gammaproteobacteria;Pseudomonadales;Moraxellaceae;Enhydrobacter;Moraxellaceae_bacterium_14b-m12-2	100	254	2e-141
denovo2906		2	0	2	0	0	0	0	GQ350737.1.1349_Bacteria;Proteobacteria;Deltaproteobacteria;SAR324_clade(Marine_group_B);uncultured_delta_proteobacterium	100	253	7e-141
denovo2923		2	0	2	0	0	0	0	JN175342.1.1527_Bacteria;Proteobacteria;Gammaproteobacteria;Enterobacteriales;Enterobacteriaceae;Tatumella;Tatumella_punctata	96.44	253	2e-119
denovo2933	Archaea	2	0	0	0	0	2	0	EF444638.1.1180_Archaea;Euryarchaeota;Halobacteria;Halobacteriales;SM1K20;uncultured_archaeon	91.34	254	6e-89
denovo2942		2	0	0	1	0	0	1	HM556852.1.1374_Bacteria;Proteobacteria;Gammaproteobacteria;Enterobacteriales;Enterobacteriaceae;Tatumella;uncultured_bacterium	96.44	253	2e-119
denovo2952		2	0	2	0	0	0	0	EU386092.1.1469_Bacteria;Candidate_division_BRC1;uncultured_bacterium	98.42	253	3e-131
denovo2964		2	0	0	0	0	1	1	JN175342.1.1527_Bacteria;Proteobacteria;Gammaproteobacteria;Enterobacteriales;Enterobacteriaceae;Tatumella;Tatumella_punctata	96.44	253	2e-119
denovo297		2	1	0	0	1	0	0	JN175342.1.1527_Bacteria;Proteobacteria;Gammaproteobacteria;Enterobacteriales;Enterobacteriaceae;Tatumella;Tatumella_punctata	95.26	253	3e-112
denovo2988		2	0	1	0	0	0	1	JN175342.1.1527_Bacteria;Proteobacteria;Gammaproteobacteria;Enterobacteriales;Enterobacteriaceae;Tatumella;Tatumella_punctata	94.86	253	8e-110
denovo3023		2	1	1	0	0	0	0	JN175342.1.1527_Bacteria;Proteobacteria;Gammaproteobacteria;Enterobacteriales;Enterobacteriaceae;Tatumella;Tatumella_punctata	96.84	253	8e-110
denovo3045		2	1	0	1	0	0	0	JN175342.1.1527_Bacteria;Proteobacteria;Gammaproteobacteria;Enterobacteriales;Enterobacteriaceae;Tatumella;Tatumella_punctata	96.44	253	2e-119
denovo3046		2	1	0	1	0	0	0	JN613470.1.1451_Bacteria;Proteobacteria;Gammaproteobacteria;Enterobacteriales;Enterobacteriaceae;Enterobacter;Leclercia_sp._O-NR2	96.84	253	9e-122
denovo3052		2	0	1	0	0	1	0	JN657217.1.1499_Bacteria;Proteobacteria;Gammaproteobacteria;Enterobacteriales;Enterobacteriaceae;Enterobacter;Enterobacter_sp._JC163	96.05	253	5e-117
denovo3062		2	1	0	0	0	0	1	Z96078.1.1495_Bacteria;Proteobacteria;Gammaproteobacteria;Enterobacteriales;Enterobacteriaceae;Enterobacter;Enterobacter_cancerogenus	95.26	253	3e-100
denovo3074		2	0	1	0	0	1	0	HM335046.1.1363_Bacteria;Proteobacteria;Gammaproteobacteria;Enterobacteriales;Enterobacteriaceae;Enterobacter;uncultured_bacterium	97.23	253	4e-124
denovo3081		2	0	0	0	0	2	0	JN175342.1.1527_Bacteria;Proteobacteria;Gammaproteobacteria;Enterobacteriales;Enterobacteriaceae;Tatumella;Tatumella_punctata	97.2	250	2e-122
denovo3088		2	2	0	0	0	0	0	JN175342.1.1527_Bacteria;Proteobacteria;Gammaproteobacteria;Enterobacteriales;Enterobacteriaceae;Tatumella;Tatumella_punctata	96.84	253	9e-122
denovo3094		2	0	0	0	2	0	0	FJ478979.1.1477_Bacteria;Actinobacteria;Actinobacteria;Micromonosporales;Micromonosporaceae;Actinaurispora;uncultured_bacterium	99.6	253	2e-138
denovo3095		2	1	0	0	1	0	0	JN175342.1.1527_Bacteria;Proteobacteria;Gammaproteobacteria;Enterobacteriales;Enterobacteriaceae;Tatumella;Tatumella_punctata	96.84	253	9e-122
denovo312		2	0	0	0	2	0	0	JN175342.1.1527_Bacteria;Proteobacteria;Gammaproteobacteria;Enterobacteriales;Enterobacteriaceae;Tatumella;Tatumella_punctata	94.86	253	8e-110
denovo3120		2	1	0	0	1	0	0	U77482.1.1452_Bacteria;Proteobacteria;Gammaproteobacteria;Order_Incertae_Sedis;Family_Incertae_Sedis;Sedimenticola;Escarpia_spicata_endosymbiont	96.84	253	9e-122
denovo3124		2	0	2	0	0	0	0	HM556474.1.1373_Bacteria;Proteobacteria;Gammaproteobacteria;Enterobacteriales;Enterobacteriaceae;Tatumella;uncultured_bacterium	96.84	253	9e-122
denovo3170		2	0	1	0	0	1	0	JN175342.1.1527_Bacteria;Proteobacteria;Gammaproteobacteria;Enterobacteriales;Enterobacteriaceae;Tatumella;Tatumella_punctata	96.76	216	4e-102
denovo3171		2	1	0	0	0	0	1	JQ342889.1.1343_Bacteria;Proteobacteria;Alphaproteobacteria;Rhizobiales;Bradyrhizobiaceae;Bosea;Bosea_vestrisii	99.6	253	2e-138
denovo318		2	0	1	0	1	0	0	JN049601.1.1503_Bacteria;Proteobacteria;Gammaproteobacteria;Xanthomonadales;Xanthomonadaceae;Stenotrophomonas;Klebsiella_sp._Y6	97.25	218	1e-105
denovo3187		2	0	0	2	0	0	0	U77482.1.1452_Bacteria;Proteobacteria;Gammaproteobacteria;Order_Incertae_Sedis;Family_Incertae_Sedis;Sedimenticola;Escarpia_spicata_endosymbiont	94.52	219	5e-92
denovo319		2	1	0	0	0	0	1	JN175342.1.1527_Bacteria;Proteobacteria;Gammaproteobacteria;Enterobacteriales;Enterobacteriaceae;Tatumella;Tatumella_punctata	96.84	253	9e-122
denovo3191		2	2	0	0	0	0	0	AB021400.1.1522_Bacteria;Proteobacteria;Gammaproteobacteria;Enterobacteriales;Enterobacteriaceae;Tatumella;Pseudomonas_flectens	97.23	253	4e-124
denovo3225		2	0	2	0	0	0	0	JN113074.1.1496_Bacteria;Planctomycetes;Planctomycetacia;Planctomycetales;Planctomycetaceae;Rhodopirellula;uncultured_bacterium	98.02	253	6e-129
denovo323		2	1	0	0	0	0	1	Y08540.1.1473_Bacteria;Actinobacteria;Actinobacteria;Micrococcales;Intrasporangiaceae;Janibacter;Janibacter_limosus	100	253	7e-141
denovo3238		2	0	2	0	0	0	0	JN175342.1.1527_Bacteria;Proteobacteria;Gammaproteobacteria;Enterobacteriales;Enterobacteriaceae;Tatumella;Tatumella_punctata	96.84	253	9e-122
denovo3259		2	1	1	0	0	0	0	HM558240.1.1372_Bacteria;Proteobacteria;Gammaproteobacteria;Enterobacteriales;Enterobacteriaceae;Tatumella;uncultured_bacterium	96.05	253	5e-117
denovo33		2	0	2	0	0	0	0	JN175342.1.1527_Bacteria;Proteobacteria;Gammaproteobacteria;Enterobacteriales;Enterobacteriaceae;Tatumella;Tatumella_punctata	96.44	253	2e-119
denovo3312		2	1	1	0	0	0	0	JN175342.1.1527_Bacteria;Proteobacteria;Gammaproteobacteria;Enterobacteriales;Enterobacteriaceae;Tatumella;Tatumella_punctata	96.44	253	2e-107
denovo3320		2	1	0	0	0	1	0	HM558240.1.1372_Bacteria;Proteobacteria;Gammaproteobacteria;Enterobacteriales;Enterobacteriaceae;Tatumella;uncultured_bacterium	97.23	253	3e-112
denovo333		2	1	1	0	0	0	0	GU235659.1.1341_Bacteria;Proteobacteria;Gammaproteobacteria;Oceanospirillales;Oceanospirillaceae;Pseudospirillum;uncultured_marine_bacterium	95.28	254	2e-110
denovo3334		2	0	1	0	0	0	1	JF958137.1.1407_Bacteria;Proteobacteria;Gammaproteobacteria;Enterobacteriales;Enterobacteriaceae;Pectobacterium;Erwinia_sp._JSC-N3-112-2	97.25	218	1e-105
denovo3346		2	1	0	0	1	0	0	JN175342.1.1527_Bacteria;Proteobacteria;Gammaproteobacteria;Enterobacteriales;Enterobacteriaceae;Tatumella;Tatumella_punctata	96.84	253	9e-122
denovo3355		2	0	1	0	0	1	0	JN175342.1.1527_Bacteria;Proteobacteria;Gammaproteobacteria;Enterobacteriales;Enterobacteriaceae;Tatumella;Tatumella_punctata	96.05	253	5e-117
denovo3358		2	0	2	0	0	0	0	HM558240.1.1372_Bacteria;Proteobacteria;Gammaproteobacteria;Enterobacteriales;Enterobacteriaceae;Tatumella;uncultured_bacterium	97.4	192	1e-92
denovo3365		2	0	2	0	0	0	0	JN175342.1.1527_Bacteria;Proteobacteria;Gammaproteobacteria;Enterobacteriales;Enterobacteriaceae;Tatumella;Tatumella_punctata	96.05	253	5e-117
denovo3366		2	2	0	0	0	0	0	JN175342.1.1527_Bacteria;Proteobacteria;Gammaproteobacteria;Enterobacteriales;Enterobacteriaceae;Tatumella;Tatumella_punctata	94.69	245	4e-105
denovo3376		2	1	1	0	0	0	0	JN175342.1.1527_Bacteria;Proteobacteria;Gammaproteobacteria;Enterobacteriales;Enterobacteriaceae;Tatumella;Tatumella_punctata	96.84	253	9e-122
denovo3387		2	0	0	0	0	2	0	JN175342.1.1527_Bacteria;Proteobacteria;Gammaproteobacteria;Enterobacteriales;Enterobacteriaceae;Tatumella;Tatumella_punctata	95.65	253	1e-114
denovo340		2	1	1	0	0	0	0	JN175342.1.1527_Bacteria;Proteobacteria;Gammaproteobacteria;Enterobacteriales;Enterobacteriaceae;Tatumella;Tatumella_punctata	95.65	253	1e-114
denovo3403		2	0	1	0	0	0	1	JN175342.1.1527_Bacteria;Proteobacteria;Gammaproteobacteria;Enterobacteriales;Enterobacteriaceae;Tatumella;Tatumella_punctata	96.44	253	2e-119
denovo3408		2	0	0	0	0	0	2	GU584306.1.1398_Bacteria;Proteobacteria;Gammaproteobacteria;Thiotrichales;Piscirickettsiaceae;uncultured;uncultured_bacterium	96.84	253	9e-122
denovo3431		2	1	1	0	0	0	0	JN175342.1.1527_Bacteria;Proteobacteria;Gammaproteobacteria;Enterobacteriales;Enterobacteriaceae;Tatumella;Tatumella_punctata	96.44	253	2e-119
denovo3457		2	0	0	0	2	0	0	Y10077.1.1400_Bacteria;Actinobacteria;Actinobacteria;Corynebacteriales;Corynebacteriaceae;Corynebacterium;Corynebacterium_kroppenstedtii	100	254	2e-141
denovo3477		2	0	0	0	1	1	0	JN175342.1.1527_Bacteria;Proteobacteria;Gammaproteobacteria;Enterobacteriales;Enterobacteriaceae;Tatumella;Tatumella_punctata	96.84	253	9e-122
denovo3478		2	0	2	0	0	0	0	JF706534.1.1396_Bacteria;Proteobacteria;Gammaproteobacteria;Enterobacteriales;Enterobacteriaceae;Erwinia;Erwinia_rhapontici	96.44	253	2e-119
denovo3483		2	1	0	0	1	0	0	JN175342.1.1527_Bacteria;Proteobacteria;Gammaproteobacteria;Enterobacteriales;Enterobacteriaceae;Tatumella;Tatumella_punctata	95.26	253	3e-112
denovo3504		2	0	2	0	0	0	0	GQ416277.1.1463_Bacteria;Proteobacteria;Gammaproteobacteria;Enterobacteriales;Enterobacteriaceae;Enterobacter;uncultured_Enterobacter_sp.	93.68	253	1e-102
denovo362		2	0	1	1	0	0	0	JN175342.1.1527_Bacteria;Proteobacteria;Gammaproteobacteria;Enterobacteriales;Enterobacteriaceae;Tatumella;Tatumella_punctata	96.05	253	5e-117
denovo363		2	0	1	0	1	0	0	JN175342.1.1527_Bacteria;Proteobacteria;Gammaproteobacteria;Enterobacteriales;Enterobacteriaceae;Tatumella;Tatumella_punctata	97.2	250	2e-122
denovo365		2	0	2	0	0	0	0	EU487907.1.1527_Bacteria;Candidate_division_WS3;uncultured_bacterium	96.83	252	4e-121
denovo397		2	0	0	0	2	0	0	X80775.1.1448_Bacteria;Proteobacteria;Alphaproteobacteria;Rhodospirillales;Acetobacteraceae;Gluconobacter;Gluconobacter_cerinus	96.8	250	6e-120
denovo403		2	0	1	1	0	0	0	GU302483.1.1492_Bacteria;Bacteroidetes;BD2-2;uncultured_bacterium	96.84	253	9e-122
denovo409		2	1	0	0	0	1	0	JN175342.1.1527_Bacteria;Proteobacteria;Gammaproteobacteria;Enterobacteriales;Enterobacteriaceae;Tatumella;Tatumella_punctata	95.26	253	3e-112
denovo417		2	0	0	0	0	2	0	FJ516786.1.1432_Bacteria;Proteobacteria;Alphaproteobacteria;Rhodobacterales;Rhodobacteraceae;Roseicyclus;uncultured_Rhodobacteraceae_bacterium	99.6	253	2e-138
denovo427		2	1	0	0	1	0	0	JN175342.1.1527_Bacteria;Proteobacteria;Gammaproteobacteria;Enterobacteriales;Enterobacteriaceae;Tatumella;Tatumella_punctata	96.44	253	2e-119
denovo428		2	0	2	0	0	0	0	JN175342.1.1527_Bacteria;Proteobacteria;Gammaproteobacteria;Enterobacteriales;Enterobacteriaceae;Tatumella;Tatumella_punctata	96.84	253	9e-122
denovo437		2	0	0	0	0	2	0	FQ659412.1.1329_Bacteria;Chloroflexi;Anaerolineae;Anaerolineales;Anaerolineaceae;uncultured;uncultured_soil_bacterium	96.03	252	2e-116
denovo438		2	1	0	0	0	1	0	FJ404760.1.1489_Bacteria;Proteobacteria;Gammaproteobacteria;Enterobacteriales;Enterobacteriaceae;Enterobacter;Mangrovibacter_sp._WG-1	96.05	253	5e-117
denovo439		2	1	0	0	0	0	1	JN175342.1.1527_Bacteria;Proteobacteria;Gammaproteobacteria;Enterobacteriales;Enterobacteriaceae;Tatumella;Tatumella_punctata	96.05	253	5e-117
denovo451		2	0	0	0	0	2	0	HQ203962.1.1486_Bacteria;Proteobacteria;Epsilonproteobacteria;Campylobacterales;Campylobacteraceae;Arcobacter;uncultured_bacterium	99.21	253	4e-136
denovo456		2	1	0	0	0	1	0	JN175342.1.1527_Bacteria;Proteobacteria;Gammaproteobacteria;Enterobacteriales;Enterobacteriaceae;Tatumella;Tatumella_punctata	96.44	253	2e-119
denovo464		2	0	1	0	0	1	0	JQ318909.1.1370_Bacteria;Proteobacteria;Gammaproteobacteria;Enterobacteriales;Enterobacteriaceae;Erwinia;uncultured_Erwinia_sp.	97.23	253	4e-124
denovo47		2	1	0	0	0	1	0	GQ416312.1.1463_Bacteria;Proteobacteria;Gammaproteobacteria;Enterobacteriales;Enterobacteriaceae;Klebsiella;uncultured_Klebsiella_sp.	98.02	253	6e-129
denovo475		2	2	0	0	0	0	0	JN977206.1.1534_Bacteria;Proteobacteria;Deltaproteobacteria;Desulfobacterales;Desulfobulbaceae;uncultured;uncultured_bacterium	94.86	253	8e-110
denovo482		2	0	1	0	0	0	1	JN194132.1.1320_Bacteria;Proteobacteria;Gammaproteobacteria;Enterobacteriales;Enterobacteriaceae;Pantoea;bacterium_MPB_JP_b	95.65	253	1e-114
denovo485		2	0	1	0	1	0	0	JN175342.1.1527_Bacteria;Proteobacteria;Gammaproteobacteria;Enterobacteriales;Enterobacteriaceae;Tatumella;Tatumella_punctata	96.44	253	2e-119
denovo50		2	1	0	0	0	0	1	JF706534.1.1396_Bacteria;Proteobacteria;Gammaproteobacteria;Enterobacteriales;Enterobacteriaceae;Erwinia;Erwinia_rhapontici	96.44	253	2e-119
denovo511		2	0	1	0	0	1	0	JN175342.1.1527_Bacteria;Proteobacteria;Gammaproteobacteria;Enterobacteriales;Enterobacteriaceae;Tatumella;Tatumella_punctata	96.84	253	9e-122
denovo523		2	1	0	0	0	0	1	JN175342.1.1527_Bacteria;Proteobacteria;Gammaproteobacteria;Enterobacteriales;Enterobacteriaceae;Tatumella;Tatumella_punctata	96.44	253	2e-119
denovo548		2	0	0	0	0	1	1	JN175342.1.1527_Bacteria;Proteobacteria;Gammaproteobacteria;Enterobacteriales;Enterobacteriaceae;Tatumella;Tatumella_punctata	96.05	253	5e-117
denovo556		2	0	0	0	0	1	1	JN175342.1.1527_Bacteria;Proteobacteria;Gammaproteobacteria;Enterobacteriales;Enterobacteriaceae;Tatumella;Tatumella_punctata	96.8	250	5e-108
denovo564		2	0	1	0	0	1	0	JF706534.1.1396_Bacteria;Proteobacteria;Gammaproteobacteria;Enterobacteriales;Enterobacteriaceae;Erwinia;Erwinia_rhapontici	96.44	253	2e-119
denovo578		2	0	2	0	0	0	0	JN538458.1.1224_Bacteria;Bacteroidetes;SB-5;uncultured_organism	93.28	253	3e-100
denovo587		2	1	0	0	0	1	0	GU145547.1.1476_Bacteria;Proteobacteria;Epsilonproteobacteria;Campylobacterales;Helicobacteraceae;Sulfurimonas;uncultured_bacterium	98.42	253	3e-131
denovo588		2	1	0	0	0	0	1	FJ404760.1.1489_Bacteria;Proteobacteria;Gammaproteobacteria;Enterobacteriales;Enterobacteriaceae;Enterobacter;Mangrovibacter_sp._WG-1	96.44	253	2e-119
denovo591		2	0	1	0	0	1	0	JN175342.1.1527_Bacteria;Proteobacteria;Gammaproteobacteria;Enterobacteriales;Enterobacteriaceae;Tatumella;Tatumella_punctata	96.44	253	2e-119
denovo593		2	0	2	0	0	0	0	JN990099.1.1503_Bacteria;Proteobacteria;Gammaproteobacteria;Enterobacteriales;Enterobacteriaceae;Enterobacter;uncultured_bacterium	94.86	253	8e-110
denovo613		2	0	2	0	0	0	0	FJ712498.1.1523_Bacteria;Proteobacteria;Deltaproteobacteria;Desulfobacterales;Desulfobacteraceae;uncultured;uncultured_bacterium	98.81	253	1e-133
denovo615		2	0	0	0	1	0	1	JN175342.1.1527_Bacteria;Proteobacteria;Gammaproteobacteria;Enterobacteriales;Enterobacteriaceae;Tatumella;Tatumella_punctata	96.41	223	6e-104
denovo620		2	1	0	1	0	0	0	JN990099.1.1503_Bacteria;Proteobacteria;Gammaproteobacteria;Enterobacteriales;Enterobacteriaceae;Enterobacter;uncultured_bacterium	94.47	253	2e-107
denovo627	Low Query Coverage	2	0	2	0	0	0	0	GQ503838.1.1471_Bacteria;Firmicutes;Clostridia;Clostridiales;Clostridiaceae;Clostridium;Clostridium_sp._enrichment_culture_clone_tpsrb010	92.06	63	1e-15
denovo650		2	0	2	0	0	0	0	HM558240.1.1372_Bacteria;Proteobacteria;Gammaproteobacteria;Enterobacteriales;Enterobacteriaceae;Tatumella;uncultured_bacterium	96.44	253	2e-119
denovo651		2	1	0	1	0	0	0	JN049601.1.1503_Bacteria;Proteobacteria;Gammaproteobacteria;Xanthomonadales;Xanthomonadaceae;Stenotrophomonas;Klebsiella_sp._Y6	96.44	253	2e-119
denovo652		2	0	2	0	0	0	0	JN175342.1.1527_Bacteria;Proteobacteria;Gammaproteobacteria;Enterobacteriales;Enterobacteriaceae;Tatumella;Tatumella_punctata	96.05	253	5e-117
denovo653		2	1	0	0	0	1	0	FJ404760.1.1489_Bacteria;Proteobacteria;Gammaproteobacteria;Enterobacteriales;Enterobacteriaceae;Enterobacter;Mangrovibacter_sp._WG-1	94.86	253	8e-110
denovo658		2	0	0	0	2	0	0	Z97069.1.1423_Bacteria;Actinobacteria;Actinobacteria;Corynebacteriales;Corynebacteriaceae;Corynebacterium;Corynebacterium_durum	100	254	2e-141
denovo659		2	0	1	1	0	0	0	JN049601.1.1503_Bacteria;Proteobacteria;Gammaproteobacteria;Xanthomonadales;Xanthomonadaceae;Stenotrophomonas;Klebsiella_sp._Y6	96.05	253	5e-117
denovo675		2	1	0	0	0	0	1	JN175342.1.1527_Bacteria;Proteobacteria;Gammaproteobacteria;Enterobacteriales;Enterobacteriaceae;Tatumella;Tatumella_punctata	96.44	253	2e-119
denovo676		2	1	0	0	0	0	1	JN175342.1.1527_Bacteria;Proteobacteria;Gammaproteobacteria;Enterobacteriales;Enterobacteriaceae;Tatumella;Tatumella_punctata	96.05	253	5e-117
denovo681		2	2	0	0	0	0	0	JN175342.1.1527_Bacteria;Proteobacteria;Gammaproteobacteria;Enterobacteriales;Enterobacteriaceae;Tatumella;Tatumella_punctata	97.2	250	2e-122
denovo705		2	1	1	0	0	0	0	JN175342.1.1527_Bacteria;Proteobacteria;Gammaproteobacteria;Enterobacteriales;Enterobacteriaceae;Tatumella;Tatumella_punctata	95.26	253	3e-112
denovo720		2	1	0	0	0	0	1	JN175342.1.1527_Bacteria;Proteobacteria;Gammaproteobacteria;Enterobacteriales;Enterobacteriaceae;Tatumella;Tatumella_punctata	96.84	253	9e-122
denovo729		2	0	1	0	0	0	1	JN175342.1.1527_Bacteria;Proteobacteria;Gammaproteobacteria;Enterobacteriales;Enterobacteriaceae;Tatumella;Tatumella_punctata	96.84	253	9e-122
denovo731		2	0	2	0	0	0	0	JN662061.1.1381_Bacteria;Bacteroidetes;BD2-2;uncultured_Bacteroidetes_bacterium	97.23	253	4e-124
denovo737		2	0	0	0	0	0	2	EU394576.1.1498_Bacteria;Proteobacteria;Gammaproteobacteria;Alteromonadales;Alteromonadaceae;OM60(NOR5)_clade;uncultured_gamma_proteobacterium	100	253	7e-141
denovo742		2	0	2	0	0	0	0	JN175342.1.1527_Bacteria;Proteobacteria;Gammaproteobacteria;Enterobacteriales;Enterobacteriaceae;Tatumella;Tatumella_punctata	96.4	250	1e-117
denovo743		2	0	1	0	0	0	1	JN175342.1.1527_Bacteria;Proteobacteria;Gammaproteobacteria;Enterobacteriales;Enterobacteriaceae;Tatumella;Tatumella_punctata	96.84	253	9e-122
denovo746		2	1	0	0	0	1	0	JN175342.1.1527_Bacteria;Proteobacteria;Gammaproteobacteria;Enterobacteriales;Enterobacteriaceae;Tatumella;Tatumella_punctata	97.2	250	2e-122
denovo757		2	0	0	0	1	1	0	HM556457.1.1373_Bacteria;Proteobacteria;Gammaproteobacteria;Enterobacteriales;Enterobacteriaceae;Tatumella;uncultured_bacterium	97.63	253	2e-126
denovo764		2	0	2	0	0	0	0	JN175342.1.1527_Bacteria;Proteobacteria;Gammaproteobacteria;Enterobacteriales;Enterobacteriaceae;Tatumella;Tatumella_punctata	96.44	253	2e-119
denovo767		2	0	1	0	0	0	1	HM558240.1.1372_Bacteria;Proteobacteria;Gammaproteobacteria;Enterobacteriales;Enterobacteriaceae;Tatumella;uncultured_bacterium	96	250	3e-115
denovo770		2	2	0	0	0	0	0	JN175342.1.1527_Bacteria;Proteobacteria;Gammaproteobacteria;Enterobacteriales;Enterobacteriaceae;Tatumella;Tatumella_punctata	95.26	253	3e-112
denovo791		2	0	0	0	0	0	2	EU135520.1.1257_Bacteria;Verrucomicrobia;Spartobacteria;Chthoniobacterales;Xiphinematobacteraceae;Candidatus_Xiphinematobacter;uncultured_bacterium	97.63	253	2e-126
denovo792		2	0	0	0	2	0	0	GQ259309.1.1459_Bacteria;Proteobacteria;Gammaproteobacteria;Alteromonadales;Alteromonadaceae;uncultured;uncultured_bacterium	99.6	253	2e-138
denovo804		2	0	2	0	0	0	0	EU290686.1.1521_Bacteria;Proteobacteria;Deltaproteobacteria;Desulfobacterales;Desulfobacteraceae;uncultured;uncultured_bacterium	96.44	253	2e-119
denovo805		2	0	0	0	0	2	0	JN873929.1.1482_Bacteria;Proteobacteria;Epsilonproteobacteria;Campylobacterales;Helicobacteraceae;Sulfurimonas;uncultured_bacterium	99.6	253	2e-138
denovo810		2	1	0	0	1	0	0	JN175342.1.1527_Bacteria;Proteobacteria;Gammaproteobacteria;Enterobacteriales;Enterobacteriaceae;Tatumella;Tatumella_punctata	96.44	253	2e-119
denovo818		2	0	0	0	0	2	0	JN175342.1.1527_Bacteria;Proteobacteria;Gammaproteobacteria;Enterobacteriales;Enterobacteriaceae;Tatumella;Tatumella_punctata	96.35	192	7e-88
denovo830		2	0	2	0	0	0	0	HQ787611.1.1463_Bacteria;Proteobacteria;Gammaproteobacteria;Enterobacteriales;Enterobacteriaceae;Enterobacter;uncultured_organism	96.84	253	8e-110
denovo84		2	0	2	0	0	0	0	HQ191058.1.1498_Bacteria;Proteobacteria;Gammaproteobacteria;BD7-8_marine_group;uncultured_sediment_bacterium	94.8	250	5e-108
denovo843		2	0	0	0	0	1	1	HQ787695.1.1459_Bacteria;Proteobacteria;Gammaproteobacteria;Enterobacteriales;Enterobacteriaceae;Enterobacter;uncultured_organism	96.44	253	2e-119
denovo846		2	0	1	0	1	0	0	JN175342.1.1527_Bacteria;Proteobacteria;Gammaproteobacteria;Enterobacteriales;Enterobacteriaceae;Tatumella;Tatumella_punctata	96.84	253	9e-122
denovo850		2	0	0	0	0	0	2	HQ326390.1.1502_Bacteria;Proteobacteria;Gammaproteobacteria;Oceanospirillales;Oceanospirillaceae;Neptuniibacter_;uncultured_bacterium	99.6	253	2e-138
denovo862		2	1	0	0	0	1	0	JN175342.1.1527_Bacteria;Proteobacteria;Gammaproteobacteria;Enterobacteriales;Enterobacteriaceae;Tatumella;Tatumella_punctata	97.2	250	2e-122
denovo876		2	0	1	0	0	1	0	FJ716952.1.1516_Bacteria;Bacteroidetes;SB-1;uncultured_bacterium	98.81	253	1e-133
denovo894		2	0	1	0	0	0	1	HM558240.1.1372_Bacteria;Proteobacteria;Gammaproteobacteria;Enterobacteriales;Enterobacteriaceae;Tatumella;uncultured_bacterium	96.44	253	2e-119
denovo909		2	0	0	0	0	1	1	JN175342.1.1527_Bacteria;Proteobacteria;Gammaproteobacteria;Enterobacteriales;Enterobacteriaceae;Tatumella;Tatumella_punctata	96.84	253	9e-122
denovo919		2	0	0	0	0	1	1	FJ497461.1.1442_Bacteria;Proteobacteria;Epsilonproteobacteria;Campylobacterales;Helicobacteraceae;Sulfurimonas;uncultured_hydrothermal_vent_eubacterium	97.63	253	2e-126
denovo922		2	0	0	0	0	2	0	JN175342.1.1527_Bacteria;Proteobacteria;Gammaproteobacteria;Enterobacteriales;Enterobacteriaceae;Tatumella;Tatumella_punctata	96.44	253	2e-119
denovo938		2	0	1	0	0	0	1	EF509905.1.1477_Bacteria;Proteobacteria;Gammaproteobacteria;Enterobacteriales;Enterobacteriaceae;Klebsiella;uncultured_bacterium	96.44	253	2e-119
denovo95		2	0	2	0	0	0	0	EF092229.1.1412_Bacteria;Bacteroidetes;Flavobacteria;Flavobacteriales;Flavobacteriaceae;Gilvibacter;uncultured_Flavobacteriaceae_bacterium	94.07	253	5e-105
denovo952		2	1	1	0	0	0	0	JN175342.1.1527_Bacteria;Proteobacteria;Gammaproteobacteria;Enterobacteriales;Enterobacteriaceae;Tatumella;Tatumella_punctata	96.84	253	9e-122
denovo97		2	1	1	0	0	0	0	JF119129.1.1361_Bacteria;Proteobacteria;Gammaproteobacteria;Enterobacteriales;Enterobacteriaceae;Klebsiella;uncultured_bacterium	94.86	253	8e-110
denovo974		2	0	0	0	0	1	1	JN175342.1.1527_Bacteria;Proteobacteria;Gammaproteobacteria;Enterobacteriales;Enterobacteriaceae;Tatumella;Tatumella_punctata	96.84	253	9e-122
denovo979		2	0	2	0	0	0	0	JN990099.1.1503_Bacteria;Proteobacteria;Gammaproteobacteria;Enterobacteriales;Enterobacteriaceae;Enterobacter;uncultured_bacterium	95.26	253	3e-112
denovo984	Archaea	2	0	1	0	0	1	0	EU329770.1.984_Archaea;Euryarchaeota;Halobacteria;Halobacteriales;Deep_Sea_Hydrothermal_Vent_Gp_6(DHVEG-6);uncultured_archaeon	94.09	254	3e-103
denovo0	Singleton	1	1	0	0	0	0	0	JN672630.1.1465_Bacteria;Proteobacteria;Gammaproteobacteria;BD7-8_marine_group;uncultured_gamma_proteobacterium	94.4	250	1e-105
denovo100	Singleton	1	0	0	0	0	0	1	HM556852.1.1374_Bacteria;Proteobacteria;Gammaproteobacteria;Enterobacteriales;Enterobacteriaceae;Tatumella;uncultured_bacterium	96.05	253	5e-117
denovo1001	Singleton	1	0	0	0	0	0	1	JN175342.1.1527_Bacteria;Proteobacteria;Gammaproteobacteria;Enterobacteriales;Enterobacteriaceae;Tatumella;Tatumella_punctata	94.86	253	8e-110
denovo1002	Singleton	1	0	0	0	0	0	1	JN175342.1.1527_Bacteria;Proteobacteria;Gammaproteobacteria;Enterobacteriales;Enterobacteriaceae;Tatumella;Tatumella_punctata	96.84	253	9e-122
denovo1003	Singleton	1	0	0	0	0	0	1	FJ868805.1.1515_Bacteria;Proteobacteria;Gammaproteobacteria;Enterobacteriales;Enterobacteriaceae;Enterobacter;Enterobacter_sp._BSRA1	93.68	253	1e-102
denovo1004	Singleton	1	1	0	0	0	0	0	JN175342.1.1527_Bacteria;Proteobacteria;Gammaproteobacteria;Enterobacteriales;Enterobacteriaceae;Tatumella;Tatumella_punctata	96.05	253	5e-117
denovo1005	Singleton	1	0	0	0	0	0	1	HQ121111.1.1496_Bacteria;Proteobacteria;Gammaproteobacteria;Xanthomonadales;Xanthomonadaceae;uncultured;uncultured_bacterium	100	218	5e-120
denovo1007	Singleton	1	0	0	0	0	1	0	FJ868805.1.1515_Bacteria;Proteobacteria;Gammaproteobacteria;Enterobacteriales;Enterobacteriaceae;Enterobacter;Enterobacter_sp._BSRA1	93.28	253	3e-100
denovo1009	Singleton	1	0	0	0	0	0	1	HM556852.1.1374_Bacteria;Proteobacteria;Gammaproteobacteria;Enterobacteriales;Enterobacteriaceae;Tatumella;uncultured_bacterium	96.05	253	5e-117
denovo101	Singleton	1	1	0	0	0	0	0	HM558240.1.1372_Bacteria;Proteobacteria;Gammaproteobacteria;Enterobacteriales;Enterobacteriaceae;Tatumella;uncultured_bacterium	95.26	253	3e-112
denovo1010	Singleton	1	0	1	0	0	0	0	JN175342.1.1527_Bacteria;Proteobacteria;Gammaproteobacteria;Enterobacteriales;Enterobacteriaceae;Tatumella;Tatumella_punctata	91.3	253	2e-88
denovo1011	Singleton	1	0	1	0	0	0	0	HM556852.1.1374_Bacteria;Proteobacteria;Gammaproteobacteria;Enterobacteriales;Enterobacteriaceae;Tatumella;uncultured_bacterium	97.63	253	2e-126
denovo1012	Singleton	1	0	1	0	0	0	0	JN175342.1.1527_Bacteria;Proteobacteria;Gammaproteobacteria;Enterobacteriales;Enterobacteriaceae;Tatumella;Tatumella_punctata	94.86	253	8e-110
denovo1013	Singleton	1	0	1	0	0	0	0	JN175342.1.1527_Bacteria;Proteobacteria;Gammaproteobacteria;Enterobacteriales;Enterobacteriaceae;Tatumella;Tatumella_punctata	96.05	253	5e-117
denovo1014	Singleton	1	0	0	0	0	1	0	JN990099.1.1503_Bacteria;Proteobacteria;Gammaproteobacteria;Enterobacteriales;Enterobacteriaceae;Enterobacter;uncultured_bacterium	96.44	253	2e-119
denovo1015	Singleton	1	0	0	1	0	0	0	HQ787611.1.1463_Bacteria;Proteobacteria;Gammaproteobacteria;Enterobacteriales;Enterobacteriaceae;Enterobacter;uncultured_organism	95.26	253	3e-112
denovo1016	Singleton	1	0	0	0	1	0	0	JN175342.1.1527_Bacteria;Proteobacteria;Gammaproteobacteria;Enterobacteriales;Enterobacteriaceae;Tatumella;Tatumella_punctata	95.26	253	3e-112
denovo1017	Singleton	1	0	0	0	1	0	0	JN175342.1.1527_Bacteria;Proteobacteria;Gammaproteobacteria;Enterobacteriales;Enterobacteriaceae;Tatumella;Tatumella_punctata	92.89	253	7e-98
denovo1018	Singleton	1	0	0	0	1	0	0	X80775.1.1448_Bacteria;Proteobacteria;Alphaproteobacteria;Rhodospirillales;Acetobacteraceae;Gluconobacter;Gluconobacter_cerinus	96.05	253	5e-117
denovo1019	Singleton	1	0	1	0	0	0	0	AB021400.1.1522_Bacteria;Proteobacteria;Gammaproteobacteria;Enterobacteriales;Enterobacteriaceae;Tatumella;Pseudomonas_flectens	94.07	253	5e-105
denovo102	Singleton	1	0	1	0	0	0	0	AB021400.1.1522_Bacteria;Proteobacteria;Gammaproteobacteria;Enterobacteriales;Enterobacteriaceae;Tatumella;Pseudomonas_flectens	95.65	253	1e-114
denovo1020	Singleton	1	0	1	0	0	0	0	JN175342.1.1527_Bacteria;Proteobacteria;Gammaproteobacteria;Enterobacteriales;Enterobacteriaceae;Tatumella;Tatumella_punctata	96.44	253	2e-119
denovo1021	Singleton	1	0	1	0	0	0	0	JN175342.1.1527_Bacteria;Proteobacteria;Gammaproteobacteria;Enterobacteriales;Enterobacteriaceae;Tatumella;Tatumella_punctata	95.26	253	3e-112
denovo1024	Singleton	1	0	0	0	1	0	0	JN522187.1.1483_Bacteria;Proteobacteria;Deltaproteobacteria;Desulfobacterales;Desulfobacteraceae;uncultured;uncultured_organism	90.12	253	3e-81
denovo1026	Singleton	1	0	1	0	0	0	0	JN175342.1.1527_Bacteria;Proteobacteria;Gammaproteobacteria;Enterobacteriales;Enterobacteriaceae;Tatumella;Tatumella_punctata	95.65	253	1e-114
denovo1028	Singleton	1	0	0	0	0	1	0	FJ947064.1.1401_Bacteria;Proteobacteria;Gammaproteobacteria;Enterobacteriales;Enterobacteriaceae;Serratia;Serratia_marcescens	94.86	253	8e-110
denovo1029	Singleton	1	0	1	0	0	0	0	FP236843.197359.198893_Bacteria;Proteobacteria;Gammaproteobacteria;Enterobacteriales;Enterobacteriaceae;Erwinia;Erwinia_billingiae	94.47	253	2e-107
denovo103	Singleton	1	0	0	0	1	0	0	X80775.1.1448_Bacteria;Proteobacteria;Alphaproteobacteria;Rhodospirillales;Acetobacteraceae;Gluconobacter;Gluconobacter_cerinus	96.05	253	5e-117
denovo1030	Singleton	1	0	1	0	0	0	0	JN175342.1.1527_Bacteria;Proteobacteria;Gammaproteobacteria;Enterobacteriales;Enterobacteriaceae;Tatumella;Tatumella_punctata	96.05	253	5e-117
denovo1031	Singleton	1	0	1	0	0	0	0	FJ404760.1.1489_Bacteria;Proteobacteria;Gammaproteobacteria;Enterobacteriales;Enterobacteriaceae;Enterobacter;Mangrovibacter_sp._WG-1	94.47	217	8e-91
denovo1032	Singleton	1	1	0	0	0	0	0	JN175342.1.1527_Bacteria;Proteobacteria;Gammaproteobacteria;Enterobacteriales;Enterobacteriaceae;Tatumella;Tatumella_punctata	94.86	253	8e-110
denovo1033	Singleton	1	0	0	0	1	0	0	GQ416312.1.1463_Bacteria;Proteobacteria;Gammaproteobacteria;Enterobacteriales;Enterobacteriaceae;Klebsiella;uncultured_Klebsiella_sp.	94.47	253	2e-107
denovo1035	Singleton	1	1	0	0	0	0	0	GU197429.1.1507_Bacteria;Proteobacteria;Deltaproteobacteria;Desulfobacterales;Desulfobulbaceae;uncultured;uncultured_bacterium	96.05	253	5e-117
denovo1036	Singleton	1	0	0	0	0	1	0	DQ011254.1.1445_Bacteria;Proteobacteria;Gammaproteobacteria;Enterobacteriales;Enterobacteriaceae;Enterobacter;uncultured_bacterium	95.65	253	1e-114
denovo1037	Singleton	1	1	0	0	0	0	0	JF344548.1.1461_Bacteria;Proteobacteria;Gammaproteobacteria;Chromatiales;Ectothiorhodospiraceae;Acidiferrobacter;uncultured_gamma_proteobacterium	93.17	249	7e-98
denovo1039	Singleton	1	0	1	0	0	0	0	JN175342.1.1527_Bacteria;Proteobacteria;Gammaproteobacteria;Enterobacteriales;Enterobacteriaceae;Tatumella;Tatumella_punctata	96.05	253	5e-117
denovo104	Singleton	1	0	1	0	0	0	0	HM558240.1.1372_Bacteria;Proteobacteria;Gammaproteobacteria;Enterobacteriales;Enterobacteriaceae;Tatumella;uncultured_bacterium	97.62	252	6e-126
denovo1040	Singleton	1	0	0	0	1	0	0	X80775.1.1448_Bacteria;Proteobacteria;Alphaproteobacteria;Rhodospirillales;Acetobacteraceae;Gluconobacter;Gluconobacter_cerinus	96.84	253	9e-122
denovo1041	Singleton	1	0	0	0	1	0	0	JN175342.1.1527_Bacteria;Proteobacteria;Gammaproteobacteria;Enterobacteriales;Enterobacteriaceae;Tatumella;Tatumella_punctata	95.6	250	8e-113
denovo1042	Singleton	1	0	0	0	0	1	0	JN175342.1.1527_Bacteria;Proteobacteria;Gammaproteobacteria;Enterobacteriales;Enterobacteriaceae;Tatumella;Tatumella_punctata	96.05	253	5e-105
denovo1044	Singleton	1	0	1	0	0	0	0	JF915349.1.1403_Bacteria;Proteobacteria;Gammaproteobacteria;Enterobacteriales;Enterobacteriaceae;Kluyvera;Buttiauxella_sp._NW51	97.23	253	4e-124
denovo1045	Singleton	1	0	0	0	1	0	0	X80775.1.1448_Bacteria;Proteobacteria;Alphaproteobacteria;Rhodospirillales;Acetobacteraceae;Gluconobacter;Gluconobacter_cerinus	95.26	253	3e-112
denovo1046	Singleton	1	0	1	0	0	0	0	JN391562.1.1509_Bacteria;Proteobacteria;Gammaproteobacteria;Aeromonadales;Aeromonadaceae;Tolumonas;uncultured_bacterium	96.05	253	5e-117
denovo1047	Singleton	1	0	0	0	0	0	1	JN175342.1.1527_Bacteria;Proteobacteria;Gammaproteobacteria;Enterobacteriales;Enterobacteriaceae;Tatumella;Tatumella_punctata	95.65	253	1e-114
denovo1048	Singleton	1	0	1	0	0	0	0	JN977155.1.1529_Bacteria;Proteobacteria;Gammaproteobacteria;Chromatiales;Granulosicoccaceae;Granulosicoccus;uncultured_bacterium	93.68	253	1e-102
denovo1049	Singleton	1	0	0	0	1	0	0	HQ595729.1.1499_Bacteria;Proteobacteria;Gammaproteobacteria;CK-1C4-49;gamma_proteobacterium_SS-5	93.39	242	4e-96
denovo105	Singleton	1	0	0	1	0	0	0	FN870311.1.1520_Bacteria;Proteobacteria;Deltaproteobacteria;Desulfobacterales;Desulfobulbaceae;Desulfocapsa;uncultured_bacterium	98.02	253	6e-129
denovo1051	Singleton	1	1	0	0	0	0	0	EU801119.1.1502_Bacteria;Proteobacteria;Betaproteobacteria;Methylophilales;Methylophilaceae;OM43_clade;uncultured_bacterium	93.68	253	1e-102
denovo1052	Singleton	1	0	0	0	0	0	1	JF958137.1.1407_Bacteria;Proteobacteria;Gammaproteobacteria;Enterobacteriales;Enterobacteriaceae;Pectobacterium;Erwinia_sp._JSC-N3-112-2	96.44	253	2e-119
denovo1053	Singleton	1	0	0	0	1	0	0	JN613470.1.1451_Bacteria;Proteobacteria;Gammaproteobacteria;Enterobacteriales;Enterobacteriaceae;Enterobacter;Leclercia_sp._O-NR2	95.26	253	3e-112
denovo1056	Singleton	1	1	0	0	0	0	0	JN990099.1.1503_Bacteria;Proteobacteria;Gammaproteobacteria;Enterobacteriales;Enterobacteriaceae;Enterobacter;uncultured_bacterium	95.63	252	5e-114
denovo1058	Singleton	1	1	0	0	0	0	0	JN175342.1.1527_Bacteria;Proteobacteria;Gammaproteobacteria;Enterobacteriales;Enterobacteriaceae;Tatumella;Tatumella_punctata	92.89	253	7e-98
denovo1059	Singleton	1	0	0	0	0	1	0	JN175342.1.1527_Bacteria;Proteobacteria;Gammaproteobacteria;Enterobacteriales;Enterobacteriaceae;Tatumella;Tatumella_punctata	94.86	253	8e-110
denovo106	Singleton	1	0	0	0	0	0	1	JN175342.1.1527_Bacteria;Proteobacteria;Gammaproteobacteria;Enterobacteriales;Enterobacteriaceae;Tatumella;Tatumella_punctata	96.05	253	5e-117
denovo1060	Singleton	1	0	1	0	0	0	0	AB250556.1.1385_Bacteria;Deferribacteres;Deferribacteres;Deferribacterales;Family_Incertae_Sedis;Caldithrix;uncultured_bacterium	94.72	246	3e-103
denovo1061	Singleton	1	0	0	0	0	1	0	EF509905.1.1477_Bacteria;Proteobacteria;Gammaproteobacteria;Enterobacteriales;Enterobacteriaceae;Klebsiella;uncultured_bacterium	94	250	3e-103
denovo1062	Singleton	1	1	0	0	0	0	0	JN613470.1.1451_Bacteria;Proteobacteria;Gammaproteobacteria;Enterobacteriales;Enterobacteriaceae;Enterobacter;Leclercia_sp._O-NR2	94.4	250	1e-105
denovo1063	Singleton	1	0	1	0	0	0	0	JF706534.1.1396_Bacteria;Proteobacteria;Gammaproteobacteria;Enterobacteriales;Enterobacteriaceae;Erwinia;Erwinia_rhapontici	96.44	253	2e-119
denovo1065	Singleton	1	0	0	0	0	1	0	JN175342.1.1527_Bacteria;Proteobacteria;Gammaproteobacteria;Enterobacteriales;Enterobacteriaceae;Tatumella;Tatumella_punctata	95.26	253	3e-112
denovo1066	Singleton	1	0	0	0	0	1	0	JN175342.1.1527_Bacteria;Proteobacteria;Gammaproteobacteria;Enterobacteriales;Enterobacteriaceae;Tatumella;Tatumella_punctata	95.26	253	3e-112
denovo1067	Singleton	1	0	0	0	0	1	0	JN175342.1.1527_Bacteria;Proteobacteria;Gammaproteobacteria;Enterobacteriales;Enterobacteriaceae;Tatumella;Tatumella_punctata	95.6	250	8e-113
denovo1068	Singleton	1	0	1	0	0	0	0	EU491316.1.1477_Bacteria;Proteobacteria;Deltaproteobacteria;SAR324_clade(Marine_group_B);uncultured_bacterium	92.28	246	6e-92
denovo1069	Singleton	1	0	1	0	0	0	0	JN175342.1.1527_Bacteria;Proteobacteria;Gammaproteobacteria;Enterobacteriales;Enterobacteriaceae;Tatumella;Tatumella_punctata	96.44	253	2e-119
denovo1072	Singleton	1	0	1	0	0	0	0	DQ011254.1.1445_Bacteria;Proteobacteria;Gammaproteobacteria;Enterobacteriales;Enterobacteriaceae;Enterobacter;uncultured_bacterium	92.49	253	2e-95
denovo1073	Singleton	1	0	1	0	0	0	0	JN194132.1.1320_Bacteria;Proteobacteria;Gammaproteobacteria;Enterobacteriales;Enterobacteriaceae;Pantoea;bacterium_MPB_JP_b	94.07	253	5e-105
denovo1074	Singleton	1	0	0	0	0	0	1	JF111125.1.1367_Bacteria;Proteobacteria;Betaproteobacteria;Neisseriales;Neisseriaceae;uncultured;uncultured_bacterium	100	253	7e-141
denovo1075	Singleton	1	0	0	0	1	0	0	JN175342.1.1527_Bacteria;Proteobacteria;Gammaproteobacteria;Enterobacteriales;Enterobacteriaceae;Tatumella;Tatumella_punctata	96.84	253	9e-122
denovo1077	Singleton	1	0	1	0	0	0	0	JN175342.1.1527_Bacteria;Proteobacteria;Gammaproteobacteria;Enterobacteriales;Enterobacteriaceae;Tatumella;Tatumella_punctata	96	250	3e-115
denovo1078	Singleton	1	0	1	0	0	0	0	JN990099.1.1503_Bacteria;Proteobacteria;Gammaproteobacteria;Enterobacteriales;Enterobacteriaceae;Enterobacter;uncultured_bacterium	94.47	253	2e-107
denovo108	Singleton	1	0	0	0	0	0	1	JN175342.1.1527_Bacteria;Proteobacteria;Gammaproteobacteria;Enterobacteriales;Enterobacteriaceae;Tatumella;Tatumella_punctata	94.47	253	2e-107
denovo1080	Singleton	1	0	0	0	0	0	1	AB015253.1.1499_Bacteria;Proteobacteria;Gammaproteobacteria;Order_Incertae_Sedis;Family_Incertae_Sedis;Thiohalophilus;uncultured_gamma_proteobacterium	94.86	253	8e-110
denovo1081	Singleton	1	0	0	0	0	1	0	JN175342.1.1527_Bacteria;Proteobacteria;Gammaproteobacteria;Enterobacteriales;Enterobacteriaceae;Tatumella;Tatumella_punctata	96.05	253	5e-117
denovo1083	Singleton	1	0	0	0	1	0	0	X80775.1.1448_Bacteria;Proteobacteria;Alphaproteobacteria;Rhodospirillales;Acetobacteraceae;Gluconobacter;Gluconobacter_cerinus	96.84	253	9e-122
denovo1084	Singleton	1	0	1	0	0	0	0	JN990099.1.1503_Bacteria;Proteobacteria;Gammaproteobacteria;Enterobacteriales;Enterobacteriaceae;Enterobacter;uncultured_bacterium	96.05	253	5e-117
denovo1085	Singleton	1	0	0	0	1	0	0	JQ318961.1.1364_Bacteria;Cyanobacteria;Chloroplast;uncultured_cyanobacterium	96.88	192	3e-90
denovo1086	Singleton	1	1	0	0	0	0	0	JN175342.1.1527_Bacteria;Proteobacteria;Gammaproteobacteria;Enterobacteriales;Enterobacteriaceae;Tatumella;Tatumella_punctata	94.86	253	8e-110
denovo1087	Singleton	1	0	0	0	0	0	1	X71863.1.1479_Bacteria;Proteobacteria;Alphaproteobacteria;Rhodospirillales;Acetobacteraceae;Acetobacter;Acetobacter_pasteurianus	96.44	253	2e-119
denovo1088	Singleton	1	0	1	0	0	0	0	JN175342.1.1527_Bacteria;Proteobacteria;Gammaproteobacteria;Enterobacteriales;Enterobacteriaceae;Tatumella;Tatumella_punctata	95.26	253	3e-112
denovo109	Singleton	1	0	0	0	0	1	0	JN175342.1.1527_Bacteria;Proteobacteria;Gammaproteobacteria;Enterobacteriales;Enterobacteriaceae;Tatumella;Tatumella_punctata	97.18	248	4e-121
denovo1090	Singleton	1	0	0	0	0	1	0	JN194132.1.1320_Bacteria;Proteobacteria;Gammaproteobacteria;Enterobacteriales;Enterobacteriaceae;Pantoea;bacterium_MPB_JP_b	94.47	253	2e-107
denovo1091	Singleton	1	0	1	0	0	0	0	JN977254.1.1536_Bacteria;Proteobacteria;Gammaproteobacteria;Order_Incertae_Sedis;Family_Incertae_Sedis;Thiohalophilus;uncultured_bacterium	97.23	253	4e-124
denovo1092	Singleton	1	0	0	0	0	0	1	JN175342.1.1527_Bacteria;Proteobacteria;Gammaproteobacteria;Enterobacteriales;Enterobacteriaceae;Tatumella;Tatumella_punctata	96.44	253	2e-119
denovo1093	Singleton	1	0	0	1	0	0	0	JN049601.1.1503_Bacteria;Proteobacteria;Gammaproteobacteria;Xanthomonadales;Xanthomonadaceae;Stenotrophomonas;Klebsiella_sp._Y6	95.26	253	3e-112
denovo1094	Singleton	1	0	0	1	0	0	0	JN175342.1.1527_Bacteria;Proteobacteria;Gammaproteobacteria;Enterobacteriales;Enterobacteriaceae;Tatumella;Tatumella_punctata	96.44	253	2e-119
denovo1095	Singleton	1	0	0	1	0	0	0	JN613470.1.1451_Bacteria;Proteobacteria;Gammaproteobacteria;Enterobacteriales;Enterobacteriaceae;Enterobacter;Leclercia_sp._O-NR2	94.86	253	8e-110
denovo1096	Singleton	1	0	0	1	0	0	0	JN613470.1.1451_Bacteria;Proteobacteria;Gammaproteobacteria;Enterobacteriales;Enterobacteriaceae;Enterobacter;Leclercia_sp._O-NR2	93.2	250	2e-98
denovo1097	Singleton	1	0	0	0	1	0	0	X80775.1.1448_Bacteria;Proteobacteria;Alphaproteobacteria;Rhodospirillales;Acetobacteraceae;Gluconobacter;Gluconobacter_cerinus	96.84	253	9e-122
denovo1098	Singleton	1	0	1	0	0	0	0	HQ916530.1.1405_Bacteria;Proteobacteria;Gammaproteobacteria;Order_Incertae_Sedis;Family_Incertae_Sedis;Thiohalophilus;uncultured_bacterium	93.47	245	6e-98
denovo1099	Singleton	1	0	0	1	0	0	0	JF706534.1.1396_Bacteria;Proteobacteria;Gammaproteobacteria;Enterobacteriales;Enterobacteriaceae;Erwinia;Erwinia_rhapontici	96.84	253	9e-122
denovo11	Singleton	1	0	0	1	0	0	0	JN175342.1.1527_Bacteria;Proteobacteria;Gammaproteobacteria;Enterobacteriales;Enterobacteriaceae;Tatumella;Tatumella_punctata	95.65	253	1e-114
denovo110	Singleton	1	0	1	0	0	0	0	JN175342.1.1527_Bacteria;Proteobacteria;Gammaproteobacteria;Enterobacteriales;Enterobacteriaceae;Tatumella;Tatumella_punctata	96.05	253	5e-117
denovo1101	Singleton	1	0	1	0	0	0	0	JF706534.1.1396_Bacteria;Proteobacteria;Gammaproteobacteria;Enterobacteriales;Enterobacteriaceae;Erwinia;Erwinia_rhapontici	94.86	253	8e-110
denovo1102	Singleton	1	0	1	0	0	0	0	JN233062.1.1467_Bacteria;Proteobacteria;Gammaproteobacteria;Alteromonadales;Psychromonadaceae;Psychromonas;uncultured_Alteromonadales_bacterium	99.6	253	2e-138
denovo1103	Singleton	1	0	0	0	0	0	1	JN524055.1.1498_Bacteria;Proteobacteria;Deltaproteobacteria;Sh765B-TzT-29;uncultured_organism	96.44	253	2e-119
denovo1105	Singleton	1	0	0	0	0	0	1	FJ516897.1.1501_Bacteria;Proteobacteria;Deltaproteobacteria;Myxococcales;Nannocystineae;uncultured;uncultured_delta_proteobacterium	96.06	254	3e-115
denovo1106	Singleton	1	0	1	0	0	0	0	JN175342.1.1527_Bacteria;Proteobacteria;Gammaproteobacteria;Enterobacteriales;Enterobacteriaceae;Tatumella;Tatumella_punctata	95.65	253	1e-114
denovo1107	Singleton	1	0	0	0	0	0	1	JN175342.1.1527_Bacteria;Proteobacteria;Gammaproteobacteria;Enterobacteriales;Enterobacteriaceae;Tatumella;Tatumella_punctata	95.65	253	1e-114
denovo1108	Singleton	1	0	0	0	0	0	1	JN175342.1.1527_Bacteria;Proteobacteria;Gammaproteobacteria;Enterobacteriales;Enterobacteriaceae;Tatumella;Tatumella_punctata	94.86	253	8e-110
denovo1109	Singleton	1	0	1	0	0	0	0	JN175342.1.1527_Bacteria;Proteobacteria;Gammaproteobacteria;Enterobacteriales;Enterobacteriaceae;Tatumella;Tatumella_punctata	95.65	253	1e-102
denovo111	Singleton	1	0	0	1	0	0	0	JN977381.1.1552_Bacteria;Proteobacteria;Deltaproteobacteria;Desulfobacterales;Desulfobulbaceae;uncultured;uncultured_bacterium	98.42	253	3e-131
denovo1111	Singleton	1	0	1	0	0	0	0	JN175342.1.1527_Bacteria;Proteobacteria;Gammaproteobacteria;Enterobacteriales;Enterobacteriaceae;Tatumella;Tatumella_punctata	96.44	253	2e-107
denovo1112	Singleton	1	0	0	0	0	1	0	EU491279.1.1512_Bacteria;Planctomycetes;OM190;uncultured_bacterium	95.65	253	1e-114
denovo1113	Singleton	1	0	1	0	0	0	0	JN175342.1.1527_Bacteria;Proteobacteria;Gammaproteobacteria;Enterobacteriales;Enterobacteriaceae;Tatumella;Tatumella_punctata	96.44	253	2e-119
denovo1114	Singleton	1	1	0	0	0	0	0	Z96078.1.1495_Bacteria;Proteobacteria;Gammaproteobacteria;Enterobacteriales;Enterobacteriaceae;Enterobacter;Enterobacter_cancerogenus	95.65	253	1e-102
denovo1115	Singleton	1	0	0	0	1	0	0	JN546222.1.1357_Bacteria;Proteobacteria;Betaproteobacteria;Burkholderiales;Oxalobacteraceae;Herbaspirillum;Herbaspirillum_sp._MMD15	94.47	253	2e-107
denovo1116	Singleton	1	1	0	0	0	0	0	HM558240.1.1372_Bacteria;Proteobacteria;Gammaproteobacteria;Enterobacteriales;Enterobacteriaceae;Tatumella;uncultured_bacterium	95.98	249	1e-114
denovo1118	Singleton	1	0	0	0	0	1	0	JN175342.1.1527_Bacteria;Proteobacteria;Gammaproteobacteria;Enterobacteriales;Enterobacteriaceae;Tatumella;Tatumella_punctata	91.3	253	2e-88
denovo1119	Singleton	1	0	0	0	0	0	1	JN990099.1.1503_Bacteria;Proteobacteria;Gammaproteobacteria;Enterobacteriales;Enterobacteriaceae;Enterobacter;uncultured_bacterium	95.6	250	8e-113
denovo112	Singleton	1	0	0	0	0	1	0	JN175342.1.1527_Bacteria;Proteobacteria;Gammaproteobacteria;Enterobacteriales;Enterobacteriaceae;Tatumella;Tatumella_punctata	96.4	250	1e-117
denovo1120	Singleton	1	1	0	0	0	0	0	HQ191058.1.1498_Bacteria;Proteobacteria;Gammaproteobacteria;BD7-8_marine_group;uncultured_sediment_bacterium	94.8	250	5e-108
denovo1121	Singleton	1	1	0	0	0	0	0	JN175342.1.1527_Bacteria;Proteobacteria;Gammaproteobacteria;Enterobacteriales;Enterobacteriaceae;Tatumella;Tatumella_punctata	96.05	253	5e-117
denovo1123	Singleton	1	0	1	0	0	0	0	JN175342.1.1527_Bacteria;Proteobacteria;Gammaproteobacteria;Enterobacteriales;Enterobacteriaceae;Tatumella;Tatumella_punctata	96.44	253	2e-119
denovo1124	Singleton	1	1	0	0	0	0	0	JN175342.1.1527_Bacteria;Proteobacteria;Gammaproteobacteria;Enterobacteriales;Enterobacteriaceae;Tatumella;Tatumella_punctata	95.65	253	1e-114
denovo1126	Singleton	1	0	0	1	0	0	0	GU230356.1.1496_Bacteria;Proteobacteria;Gammaproteobacteria;Run-SP154;uncultured_gamma_proteobacterium	89.6	250	5e-77
denovo1127	Singleton	1	0	0	1	0	0	0	FJ404760.1.1489_Bacteria;Proteobacteria;Gammaproteobacteria;Enterobacteriales;Enterobacteriaceae;Enterobacter;Mangrovibacter_sp._WG-1	95.65	253	1e-114
denovo1128	Singleton	1	0	0	1	0	0	0	JN194132.1.1320_Bacteria;Proteobacteria;Gammaproteobacteria;Enterobacteriales;Enterobacteriaceae;Pantoea;bacterium_MPB_JP_b	90.12	253	3e-81
denovo1129	Singleton	1	0	0	0	0	0	1	JN175342.1.1527_Bacteria;Proteobacteria;Gammaproteobacteria;Enterobacteriales;Enterobacteriaceae;Tatumella;Tatumella_punctata	96.44	253	2e-107
denovo113	Singleton	1	1	0	0	0	0	0	EU394547.1.1451_Bacteria;Proteobacteria;Alphaproteobacteria;Rhodospirillales;Rhodospirillaceae;AEGEAN-169_marine_group;uncultured_alpha_proteobacterium	99.59	243	2e-132
denovo1130	Singleton	1	0	1	0	0	0	0	JN175342.1.1527_Bacteria;Proteobacteria;Gammaproteobacteria;Enterobacteriales;Enterobacteriaceae;Tatumella;Tatumella_punctata	96.05	253	5e-117
denovo1132	Singleton	1	0	0	1	0	0	0	AM882643.1.1525_Bacteria;Proteobacteria;Deltaproteobacteria;Desulfobacterales;Desulfobacteraceae;uncultured;uncultured_delta_proteobacterium	96.05	253	5e-117
denovo1133	Singleton	1	0	0	1	0	0	0	U26418.1.1456_Bacteria;Proteobacteria;Gammaproteobacteria;Pseudomonadales;Pseudomonadaceae;Pseudomonas;Pseudomonas_balearica	98.02	253	6e-129
denovo1134	Singleton	1	0	0	1	0	0	0	FJ497598.1.1469_Bacteria;Proteobacteria;Gammaproteobacteria;Order_Incertae_Sedis;Family_Incertae_Sedis;Thiohalophilus;uncultured_gamma_proteobacterium	93.68	253	1e-102
denovo1135	Singleton	1	0	0	1	0	0	0	JN194132.1.1320_Bacteria;Proteobacteria;Gammaproteobacteria;Enterobacteriales;Enterobacteriaceae;Pantoea;bacterium_MPB_JP_b	94.07	253	5e-105
denovo1138	Singleton	1	0	0	1	0	0	0	X80775.1.1448_Bacteria;Proteobacteria;Alphaproteobacteria;Rhodospirillales;Acetobacteraceae;Gluconobacter;Gluconobacter_cerinus	90	240	8e-76
denovo1139	Singleton	1	0	1	0	0	0	0	JN613470.1.1451_Bacteria;Proteobacteria;Gammaproteobacteria;Enterobacteriales;Enterobacteriaceae;Enterobacter;Leclercia_sp._O-NR2	94.07	253	5e-105
denovo114	Singleton	1	0	1	0	0	0	0	EU016845.1.1492_Bacteria;Cyanobacteria;Chloroplast;Cycas_micronesica	97.19	249	9e-122
denovo1140	Singleton	1	0	1	0	0	0	0	JN194132.1.1320_Bacteria;Proteobacteria;Gammaproteobacteria;Enterobacteriales;Enterobacteriaceae;Pantoea;bacterium_MPB_JP_b	97.23	253	4e-124
denovo1141	Singleton	1	0	0	0	0	1	0	AB278144.1.1458_Bacteria;Proteobacteria;Gammaproteobacteria;Chromatiales;Granulosicoccaceae;Granulosicoccus;uncultured_bacterium	95.26	253	3e-112
denovo1142	Singleton	1	0	0	0	1	0	0	JN175342.1.1527_Bacteria;Proteobacteria;Gammaproteobacteria;Enterobacteriales;Enterobacteriaceae;Tatumella;Tatumella_punctata	93.88	245	3e-100
denovo1143	Singleton	1	0	0	0	0	0	1	JN175342.1.1527_Bacteria;Proteobacteria;Gammaproteobacteria;Enterobacteriales;Enterobacteriaceae;Tatumella;Tatumella_punctata	96.05	253	5e-117
denovo1144	Singleton	1	0	1	0	0	0	0	HQ178881.1.1487_Bacteria;Proteobacteria;Deltaproteobacteria;Desulfobacterales;Desulfobacteraceae;Desulfobacterium;uncultured_bacterium	92.89	253	7e-98
denovo1145	Singleton	1	0	1	0	0	0	0	HM461126.1.1463_Bacteria;Proteobacteria;Gammaproteobacteria;Enterobacteriales;Enterobacteriaceae;Enterobacter;Enterobacter_sp._enrichment_culture_clone_HSL3	93.68	253	2e-91
denovo1146	Singleton	1	0	1	0	0	0	0	JN175342.1.1527_Bacteria;Proteobacteria;Gammaproteobacteria;Enterobacteriales;Enterobacteriaceae;Tatumella;Tatumella_punctata	94.07	253	5e-105
denovo1147	Singleton	1	0	0	1	0	0	0	GQ261812.1.1404_Bacteria;Proteobacteria;Epsilonproteobacteria;Campylobacterales;Helicobacteraceae;Sulfurimonas;uncultured_epsilon_proteobacterium	94.47	253	2e-107
denovo1148	Singleton	1	0	1	0	0	0	0	DQ234241.1.1543_Bacteria;Proteobacteria;Gammaproteobacteria;Chromatiales;Ectothiorhodospiraceae;Thioalkalispira;uncultured_gamma_proteobacterium	96.84	253	9e-122
denovo1149	Singleton	1	1	0	0	0	0	0	HM461126.1.1463_Bacteria;Proteobacteria;Gammaproteobacteria;Enterobacteriales;Enterobacteriaceae;Enterobacter;Enterobacter_sp._enrichment_culture_clone_HSL3	95.65	253	3e-103
denovo115	Singleton	1	1	0	0	0	0	0	JQ287029.1.1477_Bacteria;Proteobacteria;Epsilonproteobacteria;Campylobacterales;Helicobacteraceae;Sulfurimonas;uncultured_bacterium	94.07	253	5e-105
denovo1150	Singleton	1	0	0	1	0	0	0	JN175342.1.1527_Bacteria;Proteobacteria;Gammaproteobacteria;Enterobacteriales;Enterobacteriaceae;Tatumella;Tatumella_punctata	96.83	252	4e-121
denovo1151	Singleton	1	0	1	0	0	0	0	JN175342.1.1527_Bacteria;Proteobacteria;Gammaproteobacteria;Enterobacteriales;Enterobacteriaceae;Tatumella;Tatumella_punctata	95.26	253	3e-112
denovo1152	Singleton	1	0	1	0	0	0	0	JN194132.1.1320_Bacteria;Proteobacteria;Gammaproteobacteria;Enterobacteriales;Enterobacteriaceae;Pantoea;bacterium_MPB_JP_b	94.47	253	2e-107
denovo1154	Singleton	1	1	0	0	0	0	0	FJ535253.1.1337_Bacteria;Proteobacteria;Epsilonproteobacteria;Campylobacterales;Helicobacteraceae;Sulfurimonas;uncultured_bacterium	91.3	253	3e-78
denovo1155	Singleton	1	0	1	0	0	0	0	DQ394953.1.1507_Bacteria;Proteobacteria;Gammaproteobacteria;Order_Incertae_Sedis;Family_Incertae_Sedis;Sedimenticola;uncultured_gamma_proteobacterium	96.05	253	5e-117
denovo1157	Singleton	1	0	1	0	0	0	0	JN990099.1.1503_Bacteria;Proteobacteria;Gammaproteobacteria;Enterobacteriales;Enterobacteriaceae;Enterobacter;uncultured_bacterium	95.65	253	1e-114
denovo1159	Singleton	1	0	1	0	0	0	0	JN175342.1.1527_Bacteria;Proteobacteria;Gammaproteobacteria;Enterobacteriales;Enterobacteriaceae;Tatumella;Tatumella_punctata	96.44	253	2e-119
denovo116	Singleton	1	1	0	0	0	0	0	EU491111.1.1503_Bacteria;Proteobacteria;Gammaproteobacteria;BD7-8_marine_group;uncultured_bacterium	96.79	249	2e-119
denovo1160	Singleton	1	0	0	0	0	0	1	JN194132.1.1320_Bacteria;Proteobacteria;Gammaproteobacteria;Enterobacteriales;Enterobacteriaceae;Pantoea;bacterium_MPB_JP_b	96.84	253	9e-122
denovo1161	Singleton	1	0	0	0	0	1	0	JN175342.1.1527_Bacteria;Proteobacteria;Gammaproteobacteria;Enterobacteriales;Enterobacteriaceae;Tatumella;Tatumella_punctata	95.65	253	1e-114
denovo1162	Singleton	1	1	0	0	0	0	0	DQ068760.1.1462_Bacteria;Proteobacteria;Gammaproteobacteria;Enterobacteriales;Enterobacteriaceae;Trabulsiella;Salmonella_sp._Co9936	97.23	253	4e-124
denovo1163	Singleton	1	1	0	0	0	0	0	HM556852.1.1374_Bacteria;Proteobacteria;Gammaproteobacteria;Enterobacteriales;Enterobacteriaceae;Tatumella;uncultured_bacterium	96.84	253	9e-122
denovo1165	Singleton	1	1	0	0	0	0	0	JQ318909.1.1370_Bacteria;Proteobacteria;Gammaproteobacteria;Enterobacteriales;Enterobacteriaceae;Erwinia;uncultured_Erwinia_sp.	96.34	246	3e-115
denovo1166	Singleton	1	0	0	0	0	1	0	JN175342.1.1527_Bacteria;Proteobacteria;Gammaproteobacteria;Enterobacteriales;Enterobacteriaceae;Tatumella;Tatumella_punctata	96.44	253	2e-119
denovo1167	Singleton	1	0	0	0	1	0	0	EU134679.1.1366_Bacteria;Firmicutes;Clostridia;Clostridiales;Family_XVIII_Incertae_Sedis;Symbiobacterium;uncultured_bacterium	94.47	253	2e-107
denovo1168	Singleton	1	0	0	0	1	0	0	X80775.1.1448_Bacteria;Proteobacteria;Alphaproteobacteria;Rhodospirillales;Acetobacteraceae;Gluconobacter;Gluconobacter_cerinus	95.26	253	3e-112
denovo1169	Singleton	1	0	0	0	0	1	0	HQ787611.1.1463_Bacteria;Proteobacteria;Gammaproteobacteria;Enterobacteriales;Enterobacteriaceae;Enterobacter;uncultured_organism	96.05	253	5e-117
denovo117	Singleton	1	1	0	0	0	0	0	GU451635.1.1247_Bacteria;Bacteroidetes;Sphingobacteriia;Sphingobacteriales;Saprospiraceae;Lewinella;uncultured_bacterium	98.15	216	3e-109
denovo1170	Singleton	1	1	0	0	0	0	0	JN613470.1.1451_Bacteria;Proteobacteria;Gammaproteobacteria;Enterobacteriales;Enterobacteriaceae;Enterobacter;Leclercia_sp._O-NR2	97.23	253	4e-124
denovo1171	Singleton	1	0	0	0	0	1	0	JN529047.1.1435_Bacteria;Bacteroidetes;BD2-2;uncultured_organism	98.02	253	6e-129
denovo1172	Singleton	1	0	1	0	0	0	0	JN175342.1.1527_Bacteria;Proteobacteria;Gammaproteobacteria;Enterobacteriales;Enterobacteriaceae;Tatumella;Tatumella_punctata	96.84	253	9e-122
denovo1173	Singleton	1	0	0	1	0	0	0	AM882620.1.1522_Bacteria;Proteobacteria;Deltaproteobacteria;Desulfobacterales;Desulfobacteraceae;SEEP-SRB1;uncultured_delta_proteobacterium	94.47	253	2e-107
denovo1175	Singleton	1	0	0	0	0	0	1	JN194132.1.1320_Bacteria;Proteobacteria;Gammaproteobacteria;Enterobacteriales;Enterobacteriaceae;Pantoea;bacterium_MPB_JP_b	92.49	253	2e-95
denovo1176	Singleton	1	0	0	0	0	1	0	JN175342.1.1527_Bacteria;Proteobacteria;Gammaproteobacteria;Enterobacteriales;Enterobacteriaceae;Tatumella;Tatumella_punctata	96.44	253	2e-119
denovo1177	Singleton	1	0	0	0	0	0	1	EF604413.1.1489_Bacteria;Proteobacteria;Gammaproteobacteria;Enterobacteriales;Enterobacteriaceae;Salmonella;uncultured_bacterium	95.65	253	1e-114
denovo1178	Singleton	1	1	0	0	0	0	0	X80775.1.1448_Bacteria;Proteobacteria;Alphaproteobacteria;Rhodospirillales;Acetobacteraceae;Gluconobacter;Gluconobacter_cerinus	93.68	253	1e-102
denovo118	Singleton	1	0	0	0	1	0	0	GQ356951.1.1491_Bacteria;Bacteroidetes;Bacteroidia;Bacteroidales;Marinilabiaceae;uncultured;uncultured_bacterium	93.68	253	1e-102
denovo1180	Singleton	1	1	0	0	0	0	0	FJ868805.1.1515_Bacteria;Proteobacteria;Gammaproteobacteria;Enterobacteriales;Enterobacteriaceae;Enterobacter;Enterobacter_sp._BSRA1	95.65	253	1e-114
denovo1181	Singleton	1	0	0	0	0	1	0	EU016845.1.1492_Bacteria;Cyanobacteria;Chloroplast;Cycas_micronesica	97.63	253	2e-126
denovo1183	Singleton	1	0	0	0	0	1	0	HQ908724.1.1449_Bacteria;Proteobacteria;Gammaproteobacteria;Order_Incertae_Sedis;Family_Incertae_Sedis;Marinicella;Marinicella_litoralis	94.31	246	3e-103
denovo1184	Singleton	1	0	1	0	0	0	0	JN175342.1.1527_Bacteria;Proteobacteria;Gammaproteobacteria;Enterobacteriales;Enterobacteriaceae;Tatumella;Tatumella_punctata	96.05	253	5e-117
denovo1185	Singleton	1	0	0	0	0	0	1	JN522187.1.1483_Bacteria;Proteobacteria;Deltaproteobacteria;Desulfobacterales;Desulfobacteraceae;uncultured;uncultured_organism	92.09	253	4e-93
denovo1186	Singleton	1	0	1	0	0	0	0	JN175342.1.1527_Bacteria;Proteobacteria;Gammaproteobacteria;Enterobacteriales;Enterobacteriaceae;Tatumella;Tatumella_punctata	94.86	253	8e-110
denovo1187	Singleton	1	0	1	0	0	0	0	JN175342.1.1527_Bacteria;Proteobacteria;Gammaproteobacteria;Enterobacteriales;Enterobacteriaceae;Tatumella;Tatumella_punctata	96.44	253	2e-119
denovo1188	Singleton	1	0	1	0	0	0	0	JF344548.1.1461_Bacteria;Proteobacteria;Gammaproteobacteria;Chromatiales;Ectothiorhodospiraceae;Acidiferrobacter;uncultured_gamma_proteobacterium	96.39	249	5e-117
denovo1189	Singleton	1	0	0	0	0	1	0	JF706534.1.1396_Bacteria;Proteobacteria;Gammaproteobacteria;Enterobacteriales;Enterobacteriaceae;Erwinia;Erwinia_rhapontici	97.6	250	9e-125
denovo119	Singleton	1	0	1	0	0	0	0	JN194132.1.1320_Bacteria;Proteobacteria;Gammaproteobacteria;Enterobacteriales;Enterobacteriaceae;Pantoea;bacterium_MPB_JP_b	96.05	253	5e-117
denovo1191	Singleton	1	1	0	0	0	0	0	FJ203277.1.1418_Bacteria;Planctomycetes;Planctomycetacia;Planctomycetales;Planctomycetaceae;Planctomyces;uncultured_bacterium	98.81	252	4e-133
denovo1192	Singleton	1	1	0	0	0	0	0	JN175342.1.1527_Bacteria;Proteobacteria;Gammaproteobacteria;Enterobacteriales;Enterobacteriaceae;Tatumella;Tatumella_punctata	96.44	253	2e-119
denovo1193	Singleton	1	0	0	0	1	0	0	X80775.1.1448_Bacteria;Proteobacteria;Alphaproteobacteria;Rhodospirillales;Acetobacteraceae;Gluconobacter;Gluconobacter_cerinus	95.93	221	2e-100
denovo1194	Singleton	1	0	0	0	0	0	1	JN793873.1.1507_Bacteria;Proteobacteria;Gammaproteobacteria;Enterobacteriales;Enterobacteriaceae;Tatumella;uncultured_Enterobacteriaceae_bacterium	95.65	253	1e-114
denovo1195	Singleton	1	0	1	0	0	0	0	JF690979.1.1419_Bacteria;Proteobacteria;Gammaproteobacteria;Enterobacteriales;Enterobacteriaceae;Enterobacter;Enterobacter_ludwigii	96.84	253	9e-122
denovo1196	Singleton	1	0	0	0	1	0	0	JN387463.1.1416_Bacteria;Fibrobacteres;Fibrobacteria;Fibrobacterales;TSCOR003-O20;uncultured_microorganism	93.28	253	7e-98
denovo1197	Singleton	1	0	1	0	0	0	0	HQ166782.1.1220_Bacteria;Proteobacteria;Gammaproteobacteria;Thiotrichales;Piscirickettsiaceae;Methylophaga;uncultured_bacterium	93.68	253	1e-102
denovo1198	Singleton	1	0	1	0	0	0	0	JN049601.1.1503_Bacteria;Proteobacteria;Gammaproteobacteria;Xanthomonadales;Xanthomonadaceae;Stenotrophomonas;Klebsiella_sp._Y6	95.26	253	3e-112
denovo12	Singleton	1	0	1	0	0	0	0	JN175342.1.1527_Bacteria;Proteobacteria;Gammaproteobacteria;Enterobacteriales;Enterobacteriaceae;Tatumella;Tatumella_punctata	96.84	253	9e-122
denovo1200	Singleton	1	1	0	0	0	0	0	HQ203915.1.1501_Bacteria;Proteobacteria;Gammaproteobacteria;Thiotrichales;Thiotrichaceae;uncultured;uncultured_bacterium	92.09	253	4e-93
denovo1201	Singleton	1	0	0	0	1	0	0	JN175342.1.1527_Bacteria;Proteobacteria;Gammaproteobacteria;Enterobacteriales;Enterobacteriaceae;Tatumella;Tatumella_punctata	96.05	253	5e-117
denovo1202	Singleton	1	0	0	0	1	0	0	HM556457.1.1373_Bacteria;Proteobacteria;Gammaproteobacteria;Enterobacteriales;Enterobacteriaceae;Tatumella;uncultured_bacterium	97.63	253	2e-126
denovo1203	Singleton	1	0	0	0	0	0	1	DQ372921.1.1366_Bacteria;Proteobacteria;Alphaproteobacteria;Rhizobiales;Aurantimonadaceae;Aureimonas;Aureimonas_altamirensis	100	253	7e-141
denovo1206	Singleton	1	0	0	0	0	1	0	AB597540.1.1539_Bacteria;Proteobacteria;Gammaproteobacteria;Thiotrichales;Piscirickettsiaceae;uncultured;uncultured_gamma_proteobacterium	94.86	253	8e-110
denovo1207	Singleton	1	0	1	0	0	0	0	JN990099.1.1503_Bacteria;Proteobacteria;Gammaproteobacteria;Enterobacteriales;Enterobacteriaceae;Enterobacter;uncultured_bacterium	95.26	253	3e-112
denovo1208	Singleton	1	0	0	0	0	0	1	HM556761.1.1322_Bacteria;Proteobacteria;Alphaproteobacteria;Rhodospirillales;Acetobacteraceae;Acetobacter;uncultured_bacterium	97.12	243	3e-118
denovo1209	Singleton	1	0	1	0	0	0	0	JF915349.1.1403_Bacteria;Proteobacteria;Gammaproteobacteria;Enterobacteriales;Enterobacteriaceae;Kluyvera;Buttiauxella_sp._NW51	96.44	253	2e-119
denovo121	Singleton	1	0	1	0	0	0	0	EF509905.1.1477_Bacteria;Proteobacteria;Gammaproteobacteria;Enterobacteriales;Enterobacteriaceae;Klebsiella;uncultured_bacterium	94.47	253	2e-95
denovo1210	Singleton	1	0	0	0	0	1	0	GU584653.1.1400_Bacteria;Proteobacteria;Gammaproteobacteria;Legionellales;Legionellaceae;uncultured;uncultured_bacterium	93.28	253	3e-100
denovo1211	Singleton	1	0	1	0	0	0	0	FJ868805.1.1515_Bacteria;Proteobacteria;Gammaproteobacteria;Enterobacteriales;Enterobacteriaceae;Enterobacter;Enterobacter_sp._BSRA1	94.47	253	2e-107
denovo1212	Singleton	1	1	0	0	0	0	0	JN175342.1.1527_Bacteria;Proteobacteria;Gammaproteobacteria;Enterobacteriales;Enterobacteriaceae;Tatumella;Tatumella_punctata	96.84	253	9e-122
denovo1213	Singleton	1	0	0	0	1	0	0	JF793952.1.1353_Bacteria;Proteobacteria;Alphaproteobacteria;Rhodospirillales;Acetobacteraceae;Acetobacter;Acetobacter_cerevisiae	94.86	253	8e-110
denovo1214	Singleton	1	1	0	0	0	0	0	AY922189.1.1377_Bacteria;Proteobacteria;Epsilonproteobacteria;Campylobacterales;Helicobacteraceae;Sulfurimonas;uncultured_epsilon_proteobacterium	90.12	253	3e-81
denovo1215	Singleton	1	0	0	0	0	0	1	FR870447.1.1508_Bacteria;Proteobacteria;Gammaproteobacteria;Enterobacteriales;Enterobacteriaceae;Pantoea;Erwinia_toletana	86.96	253	4e-62
denovo1216	Singleton	1	0	0	0	0	1	0	JN175342.1.1527_Bacteria;Proteobacteria;Gammaproteobacteria;Enterobacteriales;Enterobacteriaceae;Tatumella;Tatumella_punctata	95.26	253	3e-112
denovo1217	Singleton	1	0	1	0	0	0	0	JN194132.1.1320_Bacteria;Proteobacteria;Gammaproteobacteria;Enterobacteriales;Enterobacteriaceae;Pantoea;bacterium_MPB_JP_b	94.47	253	2e-107
denovo1218	Singleton	1	0	1	0	0	0	0	JN175342.1.1527_Bacteria;Proteobacteria;Gammaproteobacteria;Enterobacteriales;Enterobacteriaceae;Tatumella;Tatumella_punctata	94.07	253	5e-105
denovo1219	Singleton	1	1	0	0	0	0	0	JN175342.1.1527_Bacteria;Proteobacteria;Gammaproteobacteria;Enterobacteriales;Enterobacteriaceae;Tatumella;Tatumella_punctata	96.84	253	9e-122
denovo122	Singleton	1	0	0	0	0	0	1	FJ712571.1.1409_Bacteria;Proteobacteria;Deltaproteobacteria;Desulfobacterales;Desulfobulbaceae;Desulfocapsa;uncultured_bacterium	93.68	253	1e-102
denovo1220	Singleton	1	0	0	0	1	0	0	JN175342.1.1527_Bacteria;Proteobacteria;Gammaproteobacteria;Enterobacteriales;Enterobacteriaceae;Tatumella;Tatumella_punctata	96.05	253	5e-117
denovo1221	Singleton	1	0	0	0	0	0	1	X82290.1.1476_Bacteria;Proteobacteria;Alphaproteobacteria;Rhodospirillales;Acetobacteraceae;Gluconobacter;Gluconobacter_frateurii	96.84	253	9e-122
denovo1222	Singleton	1	0	1	0	0	0	0	JN175342.1.1527_Bacteria;Proteobacteria;Gammaproteobacteria;Enterobacteriales;Enterobacteriaceae;Tatumella;Tatumella_punctata	95.39	217	1e-95
denovo1223	Singleton	1	0	1	0	0	0	0	U78182.1.1502_Bacteria;Proteobacteria;Gammaproteobacteria;Enterobacteriales;Enterobacteriaceae;Raoultella;Raoultella_ornithinolytica	98.17	219	4e-111
denovo1224	Singleton	1	0	1	0	0	0	0	JN175342.1.1527_Bacteria;Proteobacteria;Gammaproteobacteria;Enterobacteriales;Enterobacteriaceae;Tatumella;Tatumella_punctata	95.26	253	3e-112
denovo1225	Singleton	1	0	0	0	0	1	0	HM558240.1.1372_Bacteria;Proteobacteria;Gammaproteobacteria;Enterobacteriales;Enterobacteriaceae;Tatumella;uncultured_bacterium	96.8	250	6e-120
denovo1228	Singleton	1	0	1	0	0	0	0	EF509905.1.1477_Bacteria;Proteobacteria;Gammaproteobacteria;Enterobacteriales;Enterobacteriaceae;Klebsiella;uncultured_bacterium	96.8	250	6e-120
denovo1229	Singleton	1	0	0	0	0	1	0	JN175342.1.1527_Bacteria;Proteobacteria;Gammaproteobacteria;Enterobacteriales;Enterobacteriaceae;Tatumella;Tatumella_punctata	96.05	253	5e-117
denovo1230	Singleton	1	0	1	0	0	0	0	JN175342.1.1527_Bacteria;Proteobacteria;Gammaproteobacteria;Enterobacteriales;Enterobacteriaceae;Tatumella;Tatumella_punctata	96.44	253	2e-119
denovo1231	Singleton	1	0	1	0	0	0	0	JF346889.1.1501_Bacteria;Proteobacteria;Gammaproteobacteria;Enterobacteriales;Enterobacteriaceae;Klebsiella;Klebsiella_sp._GYPB15	97.23	253	4e-124
denovo1232	Singleton	1	0	0	0	1	0	0	JF703600.1.1510_Bacteria;Proteobacteria;Gammaproteobacteria;Enterobacteriales;Enterobacteriaceae;Enterobacter;uncultured_Enterobacter_sp.	94.86	253	8e-110
denovo1234	Singleton	1	1	0	0	0	0	0	JF344268.1.1520_Bacteria;Proteobacteria;Deltaproteobacteria;Desulfobacterales;Desulfobacteraceae;Desulfobacula;uncultured_delta_proteobacterium	95.51	245	7e-110
denovo1235	Singleton	1	0	0	1	0	0	0	JF825446.1.1472_Bacteria;Proteobacteria;Gammaproteobacteria;Alteromonadales;Colwelliaceae;Colwellia;Colwellia_sp._STAB604	95.26	253	3e-112
denovo1236	Singleton	1	0	0	1	0	0	0	GQ461660.1.1400_Bacteria;Proteobacteria;Deltaproteobacteria;Desulfobacterales;Desulfobulbaceae;uncultured;uncultured_bacterium	94.47	253	2e-107
denovo1237	Singleton	1	0	1	0	0	0	0	JF115906.1.1361_Bacteria;Proteobacteria;Gammaproteobacteria;Enterobacteriales;Enterobacteriaceae;Klebsiella;uncultured_bacterium	97.23	253	4e-124
denovo1239	Singleton	1	0	1	0	0	0	0	JN175342.1.1527_Bacteria;Proteobacteria;Gammaproteobacteria;Enterobacteriales;Enterobacteriaceae;Tatumella;Tatumella_punctata	95.26	253	3e-112
denovo124	Singleton	1	0	1	0	0	0	0	HM556852.1.1374_Bacteria;Proteobacteria;Gammaproteobacteria;Enterobacteriales;Enterobacteriaceae;Tatumella;uncultured_bacterium	94.95	218	9e-94
denovo1240	Singleton	1	1	0	0	0	0	0	FN869544.1.1438_Bacteria;Proteobacteria;Gammaproteobacteria;Order_Incertae_Sedis;Family_Incertae_Sedis;Sedimenticola;Myrtea_flabelliformis_gill_endosymbiont	94.47	253	2e-107
denovo1241	Singleton	1	0	0	0	0	0	1	GQ417303.1.1463_Bacteria;Proteobacteria;Gammaproteobacteria;Enterobacteriales;Enterobacteriaceae;Klebsiella;uncultured_Klebsiella_sp.	92.4	250	9e-82
denovo1242	Singleton	1	1	0	0	0	0	0	EU652627.1.1519_Bacteria;Proteobacteria;Deltaproteobacteria;Desulfuromonadales;C8S-102;uncultured_bacterium	93.68	253	1e-102
denovo1243	Singleton	1	0	0	0	1	0	0	X80775.1.1448_Bacteria;Proteobacteria;Alphaproteobacteria;Rhodospirillales;Acetobacteraceae;Gluconobacter;Gluconobacter_cerinus	95.65	253	1e-114
denovo1245	Singleton	1	0	0	1	0	0	0	JF946790.1.1385_Bacteria;Proteobacteria;Gammaproteobacteria;Enterobacteriales;Enterobacteriaceae;Cedecea;Cedecea_sp._A415	94.47	253	2e-107
denovo1246	Singleton	1	0	1	0	0	0	0	HM556852.1.1374_Bacteria;Proteobacteria;Gammaproteobacteria;Enterobacteriales;Enterobacteriaceae;Tatumella;uncultured_bacterium	96.05	253	5e-117
denovo1247	Singleton	1	0	0	0	1	0	0	X80775.1.1448_Bacteria;Proteobacteria;Alphaproteobacteria;Rhodospirillales;Acetobacteraceae;Gluconobacter;Gluconobacter_cerinus	96.84	253	9e-122
denovo1248	Singleton	1	0	1	0	0	0	0	AB506690.1.1410_Bacteria;Proteobacteria;Gammaproteobacteria;Enterobacteriales;Enterobacteriaceae;Erwinia;Erwinia_sp._YPPS_950	96.31	217	2e-100
denovo1249	Singleton	1	0	0	1	0	0	0	JN194132.1.1320_Bacteria;Proteobacteria;Gammaproteobacteria;Enterobacteriales;Enterobacteriaceae;Pantoea;bacterium_MPB_JP_b	94.47	253	2e-107
denovo125	Singleton	1	0	1	0	0	0	0	JF706534.1.1396_Bacteria;Proteobacteria;Gammaproteobacteria;Enterobacteriales;Enterobacteriaceae;Erwinia;Erwinia_rhapontici	96.84	253	9e-122
denovo1250	Singleton	1	0	0	1	0	0	0	JN537304.1.1504_Bacteria;Proteobacteria;Deltaproteobacteria;Desulfobacterales;Desulfobacteraceae;uncultured;uncultured_organism	96.72	244	2e-116
denovo1252	Singleton	1	0	0	1	0	0	0	X80678.1.1459_Bacteria;Proteobacteria;Gammaproteobacteria;Enterobacteriales;Enterobacteriaceae;Salmonella;Salmonella_enterica_subsp._enterica_serovar_Shomron	95.34	193	1e-83
denovo1253	Singleton	1	0	0	1	0	0	0	JN175342.1.1527_Bacteria;Proteobacteria;Gammaproteobacteria;Enterobacteriales;Enterobacteriaceae;Tatumella;Tatumella_punctata	96.44	253	2e-119
denovo1255	Singleton	1	0	0	0	1	0	0	X80775.1.1448_Bacteria;Proteobacteria;Alphaproteobacteria;Rhodospirillales;Acetobacteraceae;Gluconobacter;Gluconobacter_cerinus	96.84	253	9e-122
denovo1256	Singleton	1	0	1	0	0	0	0	JN990099.1.1503_Bacteria;Proteobacteria;Gammaproteobacteria;Enterobacteriales;Enterobacteriaceae;Enterobacter;uncultured_bacterium	96.05	253	5e-117
denovo1257	Singleton	1	1	0	0	0	0	0	JN175342.1.1527_Bacteria;Proteobacteria;Gammaproteobacteria;Enterobacteriales;Enterobacteriaceae;Tatumella;Tatumella_punctata	94.47	253	2e-107
denovo1258	Singleton	1	0	0	0	0	0	1	JF706534.1.1396_Bacteria;Proteobacteria;Gammaproteobacteria;Enterobacteriales;Enterobacteriaceae;Erwinia;Erwinia_rhapontici	96.05	253	5e-117
denovo1259	Singleton	1	0	1	0	0	0	0	JF116112.1.1361_Bacteria;Actinobacteria;Actinobacteria;Corynebacteriales;Nocardiaceae;Rhodococcus;uncultured_bacterium	96.84	253	9e-122
denovo126	Singleton	1	0	1	0	0	0	0	JN175342.1.1527_Bacteria;Proteobacteria;Gammaproteobacteria;Enterobacteriales;Enterobacteriaceae;Tatumella;Tatumella_punctata	93.68	253	1e-102
denovo1260	Singleton	1	0	1	0	0	0	0	FN549949.1.1548_Bacteria;Chloroflexi;Anaerolineae;Anaerolineales;Anaerolineaceae;uncultured;uncultured_bacterium	98.81	253	1e-133
denovo1261	Singleton	1	1	0	0	0	0	0	GQ347803.1.1366_Bacteria;Proteobacteria;Gammaproteobacteria;Oceanospirillales;Oceanospirillaceae;Pseudospirillum;uncultured_gamma_proteobacterium	99.6	253	2e-138
denovo1262	Singleton	1	0	0	0	1	0	0	HM556852.1.1374_Bacteria;Proteobacteria;Gammaproteobacteria;Enterobacteriales;Enterobacteriaceae;Tatumella;uncultured_bacterium	94.86	253	8e-110
denovo1263	Singleton	1	1	0	0	0	0	0	JN175342.1.1527_Bacteria;Proteobacteria;Gammaproteobacteria;Enterobacteriales;Enterobacteriaceae;Tatumella;Tatumella_punctata	94.86	253	8e-110
denovo1264	Singleton	1	0	0	0	1	0	0	JN175342.1.1527_Bacteria;Proteobacteria;Gammaproteobacteria;Enterobacteriales;Enterobacteriaceae;Tatumella;Tatumella_punctata	95.88	194	1e-86
denovo1266	Singleton	1	1	0	0	0	0	0	JL718996.85.1599_Bacteria;Proteobacteria;Gammaproteobacteria;Pasteurellales;Pasteurellaceae;Orbus;Bombus_terrestris	99.6	253	2e-138
denovo1267	Singleton	1	0	1	0	0	0	0	HM556852.1.1374_Bacteria;Proteobacteria;Gammaproteobacteria;Enterobacteriales;Enterobacteriaceae;Tatumella;uncultured_bacterium	95.26	253	3e-112
denovo1268	Singleton	1	0	0	0	0	0	1	AY150184.1.1404_Bacteria;Proteobacteria;Gammaproteobacteria;Alteromonadales;Alteromonadaceae;Simiduia;symbiont_LP2_of_Lyrodus_pedicellatus	91.8	244	9e-88
denovo1269	Singleton	1	0	0	0	0	1	0	JQ271810.1.1430_Bacteria;Proteobacteria;Gammaproteobacteria;Enterobacteriales;Enterobacteriaceae;Citrobacter;Citrobacter_freundii	94.86	253	8e-110
denovo127	Singleton	1	0	0	0	0	1	0	GQ347425.1.1324_Bacteria;BD1-5;uncultured_bacterium	97.63	253	2e-126
denovo1271	Singleton	1	0	0	0	0	1	0	HM556457.1.1373_Bacteria;Proteobacteria;Gammaproteobacteria;Enterobacteriales;Enterobacteriaceae;Tatumella;uncultured_bacterium	96.4	250	1e-117
denovo1272	Singleton	1	0	1	0	0	0	0	JN175342.1.1527_Bacteria;Proteobacteria;Gammaproteobacteria;Enterobacteriales;Enterobacteriaceae;Tatumella;Tatumella_punctata	96.05	253	5e-117
denovo1273	Singleton	1	0	1	0	0	0	0	FJ497384.1.1450_Bacteria;Proteobacteria;Epsilonproteobacteria;Campylobacterales;Helicobacteraceae;Sulfurimonas;uncultured_epsilon_proteobacterium	99.6	253	2e-138
denovo1274	Singleton	1	0	1	0	0	0	0	JN194132.1.1320_Bacteria;Proteobacteria;Gammaproteobacteria;Enterobacteriales;Enterobacteriaceae;Pantoea;bacterium_MPB_JP_b	95.26	253	3e-112
denovo1276	Singleton	1	0	1	0	0	0	0	JN175342.1.1527_Bacteria;Proteobacteria;Gammaproteobacteria;Enterobacteriales;Enterobacteriaceae;Tatumella;Tatumella_punctata	97.22	252	1e-123
denovo1277	Singleton	1	0	0	0	0	0	1	HM779378.1.1458_Bacteria;Proteobacteria;Gammaproteobacteria;Aeromonadales;Aeromonadaceae;Aeromonas;uncultured_bacterium	94.07	253	5e-105
denovo1279	Singleton	1	0	0	1	0	0	0	JN175342.1.1527_Bacteria;Proteobacteria;Gammaproteobacteria;Enterobacteriales;Enterobacteriaceae;Tatumella;Tatumella_punctata	96.84	253	9e-122
denovo128	Singleton	1	0	0	0	1	0	0	X80775.1.1448_Bacteria;Proteobacteria;Alphaproteobacteria;Rhodospirillales;Acetobacteraceae;Gluconobacter;Gluconobacter_cerinus	96.84	253	9e-122
denovo1280	Singleton	1	0	0	1	0	0	0	JN194132.1.1320_Bacteria;Proteobacteria;Gammaproteobacteria;Enterobacteriales;Enterobacteriaceae;Pantoea;bacterium_MPB_JP_b	92.09	253	4e-93
denovo1281	Singleton	1	0	0	1	0	0	0	JN175342.1.1527_Bacteria;Proteobacteria;Gammaproteobacteria;Enterobacteriales;Enterobacteriaceae;Tatumella;Tatumella_punctata	95.26	253	3e-112
denovo1282	Singleton	1	0	0	1	0	0	0	FN562908.1.1347_Bacteria;Bacteroidetes;Flavobacteria;Flavobacteriales;Flavobacteriaceae;uncultured;uncultured_bacterium	92.09	253	4e-93
denovo1283	Singleton	1	0	1	0	0	0	0	JN175342.1.1527_Bacteria;Proteobacteria;Gammaproteobacteria;Enterobacteriales;Enterobacteriaceae;Tatumella;Tatumella_punctata	96.05	253	5e-117
denovo1284	Singleton	1	0	1	0	0	0	0	JN175342.1.1527_Bacteria;Proteobacteria;Gammaproteobacteria;Enterobacteriales;Enterobacteriaceae;Tatumella;Tatumella_punctata	94.86	253	8e-110
denovo1285	Singleton	1	0	0	1	0	0	0	GU120549.1.1461_Bacteria;Proteobacteria;Gammaproteobacteria;Chromatiales;Ectothiorhodospiraceae;Thioalkalispira;uncultured_gamma_proteobacterium	96.44	253	2e-119
denovo1286	Singleton	1	0	0	0	0	1	0	JN175342.1.1527_Bacteria;Proteobacteria;Gammaproteobacteria;Enterobacteriales;Enterobacteriaceae;Tatumella;Tatumella_punctata	96.05	253	5e-117
denovo1287	Singleton	1	0	1	0	0	0	0	JN175342.1.1527_Bacteria;Proteobacteria;Gammaproteobacteria;Enterobacteriales;Enterobacteriaceae;Tatumella;Tatumella_punctata	95.65	253	1e-114
denovo1288	Singleton	1	0	1	0	0	0	0	JF958137.1.1407_Bacteria;Proteobacteria;Gammaproteobacteria;Enterobacteriales;Enterobacteriaceae;Pectobacterium;Erwinia_sp._JSC-N3-112-2	97.23	253	4e-124
denovo1289	Singleton	1	0	1	0	0	0	0	EU287368.1.1501_Bacteria;Proteobacteria;Gammaproteobacteria;Oceanospirillales;Alcanivoracaceae;Kangiella;uncultured_bacterium	96.8	250	6e-120
denovo129	Singleton	1	0	0	1	0	0	0	HQ191035.1.1499_Bacteria;Proteobacteria;Gammaproteobacteria;HOC36;uncultured_sediment_bacterium	94.07	253	5e-105
denovo1291	Singleton	1	0	1	0	0	0	0	HE578052.1.1364_Bacteria;Cyanobacteria;Chloroplast;uncultured_Oscillatoriales_cyanobacterium	97.56	246	2e-122
denovo1292	Singleton	1	0	1	0	0	0	0	JQ287335.1.1502_Bacteria;Proteobacteria;Gammaproteobacteria;CS-B046;uncultured_bacterium	94.47	253	2e-107
denovo1294	Singleton	1	0	1	0	0	0	0	JN175342.1.1527_Bacteria;Proteobacteria;Gammaproteobacteria;Enterobacteriales;Enterobacteriaceae;Tatumella;Tatumella_punctata	96.05	253	5e-117
denovo1295	Singleton	1	1	0	0	0	0	0	JN175342.1.1527_Bacteria;Proteobacteria;Gammaproteobacteria;Enterobacteriales;Enterobacteriaceae;Tatumella;Tatumella_punctata	96.05	253	5e-117
denovo1298	Singleton	1	0	1	0	0	0	0	JF344208.1.1490_Bacteria;Proteobacteria;Deltaproteobacteria;Desulfuromonadales;Desulfuromonadaceae;Malonomas;uncultured_delta_proteobacterium	95.65	253	1e-114
denovo13	Singleton	1	0	0	1	0	0	0	FR686495.1.1391_Bacteria;Proteobacteria;Epsilonproteobacteria;Campylobacterales;Campylobacteraceae;Arcobacter;Arcobacter_sp._JC83	95.26	253	3e-112
denovo1300	Singleton	1	1	0	0	0	0	0	JN175342.1.1527_Bacteria;Proteobacteria;Gammaproteobacteria;Enterobacteriales;Enterobacteriaceae;Tatumella;Tatumella_punctata	97.21	251	6e-123
denovo1301	Singleton	1	0	1	0	0	0	0	JN175342.1.1527_Bacteria;Proteobacteria;Gammaproteobacteria;Enterobacteriales;Enterobacteriaceae;Tatumella;Tatumella_punctata	95.2	250	2e-110
denovo1302	Singleton	1	0	1	0	0	0	0	JN175342.1.1527_Bacteria;Proteobacteria;Gammaproteobacteria;Enterobacteriales;Enterobacteriaceae;Tatumella;Tatumella_punctata	96.05	253	5e-117
denovo1303	Singleton	1	0	0	0	0	0	1	JN175342.1.1527_Bacteria;Proteobacteria;Gammaproteobacteria;Enterobacteriales;Enterobacteriaceae;Tatumella;Tatumella_punctata	93.28	253	3e-100
denovo1304	Singleton	1	0	1	0	0	0	0	GU197414.1.1513_Bacteria;Proteobacteria;Deltaproteobacteria;Desulfobacterales;Desulfobulbaceae;Desulforhopalus;uncultured_bacterium	93.6	250	7e-101
denovo1305	Singleton	1	1	0	0	0	0	0	JN175342.1.1527_Bacteria;Proteobacteria;Gammaproteobacteria;Enterobacteriales;Enterobacteriaceae;Tatumella;Tatumella_punctata	95.26	253	2e-104
denovo1306	Singleton	1	0	1	0	0	0	0	JN175342.1.1527_Bacteria;Proteobacteria;Gammaproteobacteria;Enterobacteriales;Enterobacteriaceae;Tatumella;Tatumella_punctata	96.05	253	5e-117
denovo1307	Singleton	1	1	0	0	0	0	0	JN175342.1.1527_Bacteria;Proteobacteria;Gammaproteobacteria;Enterobacteriales;Enterobacteriaceae;Tatumella;Tatumella_punctata	95.26	253	3e-112
denovo1308	Singleton	1	1	0	0	0	0	0	JN175342.1.1527_Bacteria;Proteobacteria;Gammaproteobacteria;Enterobacteriales;Enterobacteriaceae;Tatumella;Tatumella_punctata	94.47	253	2e-107
denovo1309	Singleton	1	0	0	0	0	0	1	JQ398853.1.1465_Bacteria;Firmicutes;Bacilli;Bacillales;Bacillaceae;Bacillus;Bacillus_subtilis	96.84	253	9e-122
denovo131	Singleton	1	1	0	0	0	0	0	JN990099.1.1503_Bacteria;Proteobacteria;Gammaproteobacteria;Enterobacteriales;Enterobacteriaceae;Enterobacter;uncultured_bacterium	94.47	253	2e-107
denovo1310	Singleton	1	0	0	0	0	1	0	JN175342.1.1527_Bacteria;Proteobacteria;Gammaproteobacteria;Enterobacteriales;Enterobacteriaceae;Tatumella;Tatumella_punctata	95.26	253	3e-100
denovo1311	Singleton	1	1	0	0	0	0	0	HQ203810.1.1476_Bacteria;Proteobacteria;Epsilonproteobacteria;Campylobacterales;Helicobacteraceae;Sulfurimonas;uncultured_bacterium	97.23	253	4e-124
denovo1312	Singleton	1	0	1	0	0	0	0	JN175342.1.1527_Bacteria;Proteobacteria;Gammaproteobacteria;Enterobacteriales;Enterobacteriaceae;Tatumella;Tatumella_punctata	96.05	253	5e-117
denovo1314	Singleton	1	0	1	0	0	0	0	JN175342.1.1527_Bacteria;Proteobacteria;Gammaproteobacteria;Enterobacteriales;Enterobacteriaceae;Tatumella;Tatumella_punctata	92.49	253	2e-95
denovo1315	Singleton	1	0	0	0	0	0	1	U83098.1.1385_Bacteria;Proteobacteria;Alphaproteobacteria;Rickettsiales;Anaplasmataceae;Wolbachia;Wolbachia_sp.	94.47	253	2e-107
denovo1316	Singleton	1	0	0	0	0	1	0	JN175342.1.1527_Bacteria;Proteobacteria;Gammaproteobacteria;Enterobacteriales;Enterobacteriaceae;Tatumella;Tatumella_punctata	94.47	253	2e-107
denovo1317	Singleton	1	1	0	0	0	0	0	GQ417280.1.1463_Bacteria;Proteobacteria;Gammaproteobacteria;Enterobacteriales;Enterobacteriaceae;Enterobacter;uncultured_Enterobacter_sp.	94.86	253	8e-110
denovo1318	Singleton	1	0	0	0	1	0	0	JQ361750.1.1489_Bacteria;Proteobacteria;Gammaproteobacteria;Pseudomonadales;Pseudomonadaceae;Pseudomonas;Pseudomonas_fluorescens	100	253	7e-141
denovo1319	Singleton	1	0	0	0	0	1	0	JN175342.1.1527_Bacteria;Proteobacteria;Gammaproteobacteria;Enterobacteriales;Enterobacteriaceae;Tatumella;Tatumella_punctata	96.44	253	2e-119
denovo1320	Singleton	1	0	0	0	1	0	0	JN546222.1.1357_Bacteria;Proteobacteria;Betaproteobacteria;Burkholderiales;Oxalobacteraceae;Herbaspirillum;Herbaspirillum_sp._MMD15	94.07	253	5e-105
denovo1321	Singleton	1	1	0	0	0	0	0	JN175342.1.1527_Bacteria;Proteobacteria;Gammaproteobacteria;Enterobacteriales;Enterobacteriaceae;Tatumella;Tatumella_punctata	94.47	253	2e-107
denovo1322	Singleton	1	0	1	0	0	0	0	JN793873.1.1507_Bacteria;Proteobacteria;Gammaproteobacteria;Enterobacteriales;Enterobacteriaceae;Tatumella;uncultured_Enterobacteriaceae_bacterium	95.26	253	3e-112
denovo1323	Singleton	1	1	0	0	0	0	0	U83098.1.1385_Bacteria;Proteobacteria;Alphaproteobacteria;Rickettsiales;Anaplasmataceae;Wolbachia;Wolbachia_sp.	96.44	253	2e-119
denovo1324	Singleton	1	0	0	0	0	0	1	JN175342.1.1527_Bacteria;Proteobacteria;Gammaproteobacteria;Enterobacteriales;Enterobacteriaceae;Tatumella;Tatumella_punctata	96.44	253	2e-119
denovo1325	Singleton	1	1	0	0	0	0	0	JN175342.1.1527_Bacteria;Proteobacteria;Gammaproteobacteria;Enterobacteriales;Enterobacteriaceae;Tatumella;Tatumella_punctata	94.8	250	5e-108
denovo1326	Singleton	1	1	0	0	0	0	0	EF604413.1.1489_Bacteria;Proteobacteria;Gammaproteobacteria;Enterobacteriales;Enterobacteriaceae;Salmonella;uncultured_bacterium	96.44	253	2e-119
denovo1327	Singleton	1	0	1	0	0	0	0	HM556852.1.1374_Bacteria;Proteobacteria;Gammaproteobacteria;Enterobacteriales;Enterobacteriaceae;Tatumella;uncultured_bacterium	95.65	253	1e-114
denovo1328	Singleton	1	1	0	0	0	0	0	JN175342.1.1527_Bacteria;Proteobacteria;Gammaproteobacteria;Enterobacteriales;Enterobacteriaceae;Tatumella;Tatumella_punctata	96.44	253	2e-119
denovo1329	Singleton	1	0	1	0	0	0	0	JN990099.1.1503_Bacteria;Proteobacteria;Gammaproteobacteria;Enterobacteriales;Enterobacteriaceae;Enterobacter;uncultured_bacterium	95.26	253	3e-112
denovo1330	Singleton	1	1	0	0	0	0	0	JN194132.1.1320_Bacteria;Proteobacteria;Gammaproteobacteria;Enterobacteriales;Enterobacteriaceae;Pantoea;bacterium_MPB_JP_b	95.95	222	6e-101
denovo1331	Singleton	1	0	1	0	0	0	0	HM557293.1.1374_Bacteria;Proteobacteria;Gammaproteobacteria;Enterobacteriales;Enterobacteriaceae;Pantoea;uncultured_bacterium	96.05	253	5e-117
denovo1333	Singleton	1	1	0	0	0	0	0	HQ916532.1.1405_Bacteria;Proteobacteria;Gammaproteobacteria;Order_Incertae_Sedis;Family_Incertae_Sedis;Thiohalophilus;uncultured_bacterium	94.86	253	8e-110
denovo1334	Singleton	1	0	0	0	0	1	0	HQ787611.1.1463_Bacteria;Proteobacteria;Gammaproteobacteria;Enterobacteriales;Enterobacteriaceae;Enterobacter;uncultured_organism	95.65	253	1e-114
denovo1335	Singleton	1	0	0	0	0	1	0	JF706534.1.1396_Bacteria;Proteobacteria;Gammaproteobacteria;Enterobacteriales;Enterobacteriaceae;Erwinia;Erwinia_rhapontici	96.84	253	9e-122
denovo1336	Singleton	1	0	0	0	1	0	0	HM556852.1.1374_Bacteria;Proteobacteria;Gammaproteobacteria;Enterobacteriales;Enterobacteriaceae;Tatumella;uncultured_bacterium	95.65	253	1e-114
denovo1337	Singleton	1	1	0	0	0	0	0	JN175342.1.1527_Bacteria;Proteobacteria;Gammaproteobacteria;Enterobacteriales;Enterobacteriaceae;Tatumella;Tatumella_punctata	96.05	253	5e-105
denovo1338	Singleton	1	0	0	0	1	0	0	X80775.1.1448_Bacteria;Proteobacteria;Alphaproteobacteria;Rhodospirillales;Acetobacteraceae;Gluconobacter;Gluconobacter_cerinus	96.05	253	5e-117
denovo1339	Singleton	1	0	1	0	0	0	0	JN175342.1.1527_Bacteria;Proteobacteria;Gammaproteobacteria;Enterobacteriales;Enterobacteriaceae;Tatumella;Tatumella_punctata	96.44	253	2e-119
denovo134	Singleton	1	0	1	0	0	0	0	AY592706.1.1291_Bacteria;Proteobacteria;Deltaproteobacteria;Desulfobacterales;Desulfobacteraceae;Desulfofaba;uncultured_bacterium	92.24	245	9e-91
denovo1340	Singleton	1	0	1	0	0	0	0	JN175342.1.1527_Bacteria;Proteobacteria;Gammaproteobacteria;Enterobacteriales;Enterobacteriaceae;Tatumella;Tatumella_punctata	94.47	253	2e-107
denovo1342	Singleton	1	0	0	0	0	1	0	JN657217.1.1499_Bacteria;Proteobacteria;Gammaproteobacteria;Enterobacteriales;Enterobacteriaceae;Enterobacter;Enterobacter_sp._JC163	96.05	253	5e-117
denovo1343	Singleton	1	0	0	0	0	0	1	JN175342.1.1527_Bacteria;Proteobacteria;Gammaproteobacteria;Enterobacteriales;Enterobacteriaceae;Tatumella;Tatumella_punctata	95.65	253	1e-114
denovo1344	Singleton	1	1	0	0	0	0	0	X82290.1.1476_Bacteria;Proteobacteria;Alphaproteobacteria;Rhodospirillales;Acetobacteraceae;Gluconobacter;Gluconobacter_frateurii	95.2	250	2e-110
denovo1345	Singleton	1	1	0	0	0	0	0	JF706534.1.1396_Bacteria;Proteobacteria;Gammaproteobacteria;Enterobacteriales;Enterobacteriaceae;Erwinia;Erwinia_rhapontici	96.44	253	2e-119
denovo1347	Singleton	1	0	0	0	0	0	1	X82290.1.1476_Bacteria;Proteobacteria;Alphaproteobacteria;Rhodospirillales;Acetobacteraceae;Gluconobacter;Gluconobacter_frateurii	97.63	253	2e-126
denovo1348	Singleton	1	0	0	0	1	0	0	X80775.1.1448_Bacteria;Proteobacteria;Alphaproteobacteria;Rhodospirillales;Acetobacteraceae;Gluconobacter;Gluconobacter_cerinus	95.88	243	5e-111
denovo1349	Singleton	1	0	0	0	0	1	0	JN194132.1.1320_Bacteria;Proteobacteria;Gammaproteobacteria;Enterobacteriales;Enterobacteriaceae;Pantoea;bacterium_MPB_JP_b	96.05	253	5e-117
denovo135	Singleton	1	0	0	0	0	0	1	DQ334645.1.1354_Bacteria;Nitrospirae;Nitrospira;Nitrospirales;OPB95;uncultured_bacterium	96.46	254	1e-117
denovo1350	Singleton	1	0	1	0	0	0	0	JF915349.1.1403_Bacteria;Proteobacteria;Gammaproteobacteria;Enterobacteriales;Enterobacteriaceae;Kluyvera;Buttiauxella_sp._NW51	93.68	253	1e-102
denovo1351	Singleton	1	0	0	1	0	0	0	JN194132.1.1320_Bacteria;Proteobacteria;Gammaproteobacteria;Enterobacteriales;Enterobacteriaceae;Pantoea;bacterium_MPB_JP_b	94.47	253	2e-107
denovo1353	Singleton	1	0	1	0	0	0	0	JN175342.1.1527_Bacteria;Proteobacteria;Gammaproteobacteria;Enterobacteriales;Enterobacteriaceae;Tatumella;Tatumella_punctata	94.86	253	8e-110
denovo1354	Singleton	1	0	0	0	1	0	0	X80775.1.1448_Bacteria;Proteobacteria;Alphaproteobacteria;Rhodospirillales;Acetobacteraceae;Gluconobacter;Gluconobacter_cerinus	94.47	253	2e-107
denovo1355	Singleton	1	0	0	0	1	0	0	JN175342.1.1527_Bacteria;Proteobacteria;Gammaproteobacteria;Enterobacteriales;Enterobacteriaceae;Tatumella;Tatumella_punctata	92.4	250	1e-93
denovo1356	Singleton	1	0	1	0	0	0	0	FJ868805.1.1515_Bacteria;Proteobacteria;Gammaproteobacteria;Enterobacteriales;Enterobacteriaceae;Enterobacter;Enterobacter_sp._BSRA1	93.28	253	3e-100
denovo1357	Singleton	1	0	1	0	0	0	0	JN035218.1.1452_Bacteria;Proteobacteria;Gammaproteobacteria;Aeromonadales;Aeromonadaceae;Aeromonas;bacterium_SUTW_81	93.78	193	2e-76
denovo1359	Singleton	1	0	0	0	0	0	1	JN175342.1.1527_Bacteria;Proteobacteria;Gammaproteobacteria;Enterobacteriales;Enterobacteriaceae;Tatumella;Tatumella_punctata	95.65	253	1e-114
denovo136	Singleton	1	0	1	0	0	0	0	JN175342.1.1527_Bacteria;Proteobacteria;Gammaproteobacteria;Enterobacteriales;Enterobacteriaceae;Tatumella;Tatumella_punctata	96.84	253	9e-122
denovo1360	Singleton	1	0	1	0	0	0	0	JN175342.1.1527_Bacteria;Proteobacteria;Gammaproteobacteria;Enterobacteriales;Enterobacteriaceae;Tatumella;Tatumella_punctata	95.65	253	1e-114
denovo1361	Singleton	1	0	0	0	0	0	1	JN175342.1.1527_Bacteria;Proteobacteria;Gammaproteobacteria;Enterobacteriales;Enterobacteriaceae;Tatumella;Tatumella_punctata	95.65	253	1e-114
denovo1362	Singleton	1	0	0	0	0	1	0	JN194132.1.1320_Bacteria;Proteobacteria;Gammaproteobacteria;Enterobacteriales;Enterobacteriaceae;Pantoea;bacterium_MPB_JP_b	95.65	253	1e-114
denovo1363	Singleton	1	1	0	0	0	0	0	JN175342.1.1527_Bacteria;Proteobacteria;Gammaproteobacteria;Enterobacteriales;Enterobacteriaceae;Tatumella;Tatumella_punctata	95.26	253	3e-112
denovo1364	Singleton	1	0	1	0	0	0	0	EF509905.1.1477_Bacteria;Proteobacteria;Gammaproteobacteria;Enterobacteriales;Enterobacteriaceae;Klebsiella;uncultured_bacterium	96.44	253	2e-107
denovo1365	Singleton	1	1	0	0	0	0	0	JN793873.1.1507_Bacteria;Proteobacteria;Gammaproteobacteria;Enterobacteriales;Enterobacteriaceae;Tatumella;uncultured_Enterobacteriaceae_bacterium	95.26	253	3e-112
denovo1366	Singleton	1	0	1	0	0	0	0	DQ011254.1.1445_Bacteria;Proteobacteria;Gammaproteobacteria;Enterobacteriales;Enterobacteriaceae;Enterobacter;uncultured_bacterium	93.68	253	1e-102
denovo1367	Singleton	1	0	0	0	0	0	1	JF116112.1.1361_Bacteria;Actinobacteria;Actinobacteria;Corynebacteriales;Nocardiaceae;Rhodococcus;uncultured_bacterium	95.49	244	3e-109
denovo1369	Singleton	1	0	1	0	0	0	0	JN175342.1.1527_Bacteria;Proteobacteria;Gammaproteobacteria;Enterobacteriales;Enterobacteriaceae;Tatumella;Tatumella_punctata	95.26	253	3e-112
denovo137	Singleton	1	0	0	0	1	0	0	JN194132.1.1320_Bacteria;Proteobacteria;Gammaproteobacteria;Enterobacteriales;Enterobacteriaceae;Pantoea;bacterium_MPB_JP_b	96.05	253	5e-117
denovo1371	Singleton	1	0	0	0	1	0	0	X80775.1.1448_Bacteria;Proteobacteria;Alphaproteobacteria;Rhodospirillales;Acetobacteraceae;Gluconobacter;Gluconobacter_cerinus	96.44	253	2e-119
denovo1373	Singleton	1	1	0	0	0	0	0	JN035217.1.1416_Bacteria;Proteobacteria;Gammaproteobacteria;Aeromonadales;Aeromonadaceae;Aeromonas;bacterium_SUTW_73	94.86	253	8e-110
denovo1374	Singleton	1	0	0	0	1	0	0	X80775.1.1448_Bacteria;Proteobacteria;Alphaproteobacteria;Rhodospirillales;Acetobacteraceae;Gluconobacter;Gluconobacter_cerinus	92.89	253	7e-98
denovo1376	Singleton	1	0	1	0	0	0	0	HQ787611.1.1463_Bacteria;Proteobacteria;Gammaproteobacteria;Enterobacteriales;Enterobacteriaceae;Enterobacter;uncultured_organism	95.65	253	1e-114
denovo1377	Singleton	1	0	0	0	1	0	0	X80775.1.1448_Bacteria;Proteobacteria;Alphaproteobacteria;Rhodospirillales;Acetobacteraceae;Gluconobacter;Gluconobacter_cerinus	96.84	253	9e-122
denovo1378	Singleton	1	0	0	0	0	0	1	EF187249.1.1384_Bacteria;Proteobacteria;Gammaproteobacteria;Pasteurellales;Pasteurellaceae;Orbus;Pasteurellaceae_bacterium_Lv2	96.44	253	2e-119
denovo1379	Singleton	1	1	0	0	0	0	0	GU815104.1.1471_Bacteria;Proteobacteria;Gammaproteobacteria;Enterobacteriales;Enterobacteriaceae;Citrobacter;uncultured_bacterium	98.02	253	6e-129
denovo138	Singleton	1	0	0	0	1	0	0	EU289465.1.1506_Bacteria;Proteobacteria;Gammaproteobacteria;Enterobacteriales;Enterobacteriaceae;Trabulsiella;uncultured_bacterium	95.26	253	3e-112
denovo1380	Singleton	1	0	1	0	0	0	0	JN175342.1.1527_Bacteria;Proteobacteria;Gammaproteobacteria;Enterobacteriales;Enterobacteriaceae;Tatumella;Tatumella_punctata	96.84	253	9e-122
denovo1381	Singleton	1	1	0	0	0	0	0	JN175342.1.1527_Bacteria;Proteobacteria;Gammaproteobacteria;Enterobacteriales;Enterobacteriaceae;Tatumella;Tatumella_punctata	94.07	253	5e-105
denovo1382	Singleton	1	0	1	0	0	0	0	JN194132.1.1320_Bacteria;Proteobacteria;Gammaproteobacteria;Enterobacteriales;Enterobacteriaceae;Pantoea;bacterium_MPB_JP_b	97.23	253	4e-124
denovo1384	Singleton	1	0	0	0	0	0	1	JF275045.1.1214_Bacteria;Proteobacteria;Alphaproteobacteria;Rhizobiales;alphaI_cluster;uncultured_Bradyrhizobiaceae_bacterium	99.21	253	4e-136
denovo1385	Singleton	1	0	1	0	0	0	0	JN175342.1.1527_Bacteria;Proteobacteria;Gammaproteobacteria;Enterobacteriales;Enterobacteriaceae;Tatumella;Tatumella_punctata	96.05	253	5e-117
denovo1386	Singleton	1	0	1	0	0	0	0	JN175342.1.1527_Bacteria;Proteobacteria;Gammaproteobacteria;Enterobacteriales;Enterobacteriaceae;Tatumella;Tatumella_punctata	96.44	253	2e-119
denovo1387	Singleton	1	1	0	0	0	0	0	JN194132.1.1320_Bacteria;Proteobacteria;Gammaproteobacteria;Enterobacteriales;Enterobacteriaceae;Pantoea;bacterium_MPB_JP_b	92.8	250	4e-96
denovo1388	Singleton	1	0	0	0	0	1	0	HQ845900.1.1388_Bacteria;Proteobacteria;Deltaproteobacteria;Desulfobacterales;Desulfobulbaceae;Desulfocapsa;uncultured_bacterium	93.28	253	3e-100
denovo1390	Singleton	1	0	1	0	0	0	0	JN175342.1.1527_Bacteria;Proteobacteria;Gammaproteobacteria;Enterobacteriales;Enterobacteriaceae;Tatumella;Tatumella_punctata	94.86	253	8e-110
denovo1391	Singleton	1	0	0	1	0	0	0	AM997928.1.1525_Bacteria;Planctomycetes;Phycisphaerae;MSBL9;uncultured_deep-sea_bacterium	93.25	252	1e-99
denovo1392	Singleton	1	0	1	0	0	0	0	JN175342.1.1527_Bacteria;Proteobacteria;Gammaproteobacteria;Enterobacteriales;Enterobacteriaceae;Tatumella;Tatumella_punctata	94.86	253	8e-110
denovo1393	Singleton	1	0	0	1	0	0	0	FR853765.1.1505_Bacteria;Proteobacteria;Gammaproteobacteria;Enterobacteriales;Enterobacteriaceae;Klebsiella;uncultured_bacterium	94.47	253	2e-107
denovo1394	Singleton	1	0	0	1	0	0	0	GQ225769.1.1544_Bacteria;Proteobacteria;Gammaproteobacteria;Enterobacteriales;Enterobacteriaceae;Klebsiella;Klebsiella_pneumoniae	95.65	253	1e-114
denovo1395	Singleton	1	0	1	0	0	0	0	L10934.1.1298_Bacteria;Proteobacteria;Alphaproteobacteria;SAR11_clade;Surface_1;Candidatus_Pelagibacter;unidentified_marine_eubacterium	99.59	244	4e-133
denovo1396	Singleton	1	0	0	0	1	0	0	X82290.1.1476_Bacteria;Proteobacteria;Alphaproteobacteria;Rhodospirillales;Acetobacteraceae;Gluconobacter;Gluconobacter_frateurii	92.89	253	7e-98
denovo1397	Singleton	1	0	0	0	0	0	1	JN032358.1.1340_Bacteria;Proteobacteria;Alphaproteobacteria;Rhizobiales;Brucellaceae;Ochrobactrum;uncultured_Ochrobactrum_sp.	100	253	7e-141
denovo1398	Singleton	1	0	1	0	0	0	0	JF119129.1.1361_Bacteria;Proteobacteria;Gammaproteobacteria;Enterobacteriales;Enterobacteriaceae;Klebsiella;uncultured_bacterium	94.86	253	8e-110
denovo1399	Singleton	1	0	0	0	0	0	1	JN194132.1.1320_Bacteria;Proteobacteria;Gammaproteobacteria;Enterobacteriales;Enterobacteriaceae;Pantoea;bacterium_MPB_JP_b	93.68	253	1e-102
denovo14	Singleton	1	0	0	0	0	1	0	JN175342.1.1527_Bacteria;Proteobacteria;Gammaproteobacteria;Enterobacteriales;Enterobacteriaceae;Tatumella;Tatumella_punctata	96.84	253	9e-122
denovo140	Singleton	1	0	0	1	0	0	0	HQ916601.1.1313_Bacteria;Bacteroidetes;BD2-2;uncultured_bacterium	94.86	253	8e-110
denovo1401	Singleton	1	0	1	0	0	0	0	HM316162.1.1353_Bacteria;Bacteroidetes;Flavobacteria;Flavobacteriales;Cryomorphaceae;Crocinitomix;uncultured_bacterium	98.42	253	3e-131
denovo1402	Singleton	1	0	1	0	0	0	0	JN175342.1.1527_Bacteria;Proteobacteria;Gammaproteobacteria;Enterobacteriales;Enterobacteriaceae;Tatumella;Tatumella_punctata	96.05	253	5e-117
denovo1403	Singleton	1	1	0	0	0	0	0	JN990099.1.1503_Bacteria;Proteobacteria;Gammaproteobacteria;Enterobacteriales;Enterobacteriaceae;Enterobacter;uncultured_bacterium	96.44	253	2e-119
denovo1404	Singleton	1	0	1	0	0	0	0	JN175342.1.1527_Bacteria;Proteobacteria;Gammaproteobacteria;Enterobacteriales;Enterobacteriaceae;Tatumella;Tatumella_punctata	94.86	253	8e-110
denovo1405	Singleton	1	0	0	0	1	0	0	EU885154.1.1464_Bacteria;Proteobacteria;Deltaproteobacteria;Desulfovibrionales;Desulfovibrionaceae;Desulfovibrio;uncultured_bacterium	87.04	216	5e-52
denovo1406	Singleton	1	0	1	0	0	0	0	JN175342.1.1527_Bacteria;Proteobacteria;Gammaproteobacteria;Enterobacteriales;Enterobacteriaceae;Tatumella;Tatumella_punctata	92.89	253	7e-98
denovo1407	Singleton	1	0	0	0	0	1	0	HM556940.1.1327_Bacteria;Proteobacteria;Gammaproteobacteria;Enterobacteriales;Enterobacteriaceae;Escherichia-Shigella;uncultured_bacterium	96.84	253	9e-122
denovo1408	Singleton	1	0	1	0	0	0	0	JN990099.1.1503_Bacteria;Proteobacteria;Gammaproteobacteria;Enterobacteriales;Enterobacteriaceae;Enterobacter;uncultured_bacterium	92.2	218	2e-79
denovo1409	Singleton	1	0	0	0	0	0	1	JN175342.1.1527_Bacteria;Proteobacteria;Gammaproteobacteria;Enterobacteriales;Enterobacteriaceae;Tatumella;Tatumella_punctata	96.44	253	2e-119
denovo141	Singleton	1	0	0	0	0	0	1	HM556852.1.1374_Bacteria;Proteobacteria;Gammaproteobacteria;Enterobacteriales;Enterobacteriaceae;Tatumella;uncultured_bacterium	95.28	254	5e-108
denovo1410	Singleton	1	0	0	0	0	1	0	JN175342.1.1527_Bacteria;Proteobacteria;Gammaproteobacteria;Enterobacteriales;Enterobacteriaceae;Tatumella;Tatumella_punctata	96.84	253	8e-110
denovo1413	Singleton	1	0	0	0	0	1	0	HM558240.1.1372_Bacteria;Proteobacteria;Gammaproteobacteria;Enterobacteriales;Enterobacteriaceae;Tatumella;uncultured_bacterium	97.23	253	4e-124
denovo1414	Singleton	1	0	0	0	0	1	0	JF915349.1.1403_Bacteria;Proteobacteria;Gammaproteobacteria;Enterobacteriales;Enterobacteriaceae;Kluyvera;Buttiauxella_sp._NW51	92.89	253	7e-98
denovo1415	Singleton	1	0	0	0	0	1	0	JN175342.1.1527_Bacteria;Proteobacteria;Gammaproteobacteria;Enterobacteriales;Enterobacteriaceae;Tatumella;Tatumella_punctata	95.65	253	1e-114
denovo1416	Singleton	1	1	0	0	0	0	0	FN553586.1.1501_Bacteria;Proteobacteria;Gammaproteobacteria;Chromatiales;Ectothiorhodospiraceae;Acidiferrobacter;uncultured_sediment_bacterium	95.51	245	7e-110
denovo1418	Singleton	1	1	0	0	0	0	0	JN175342.1.1527_Bacteria;Proteobacteria;Gammaproteobacteria;Enterobacteriales;Enterobacteriaceae;Tatumella;Tatumella_punctata	97.19	249	9e-122
denovo142	Singleton	1	0	1	0	0	0	0	JN175342.1.1527_Bacteria;Proteobacteria;Gammaproteobacteria;Enterobacteriales;Enterobacteriaceae;Tatumella;Tatumella_punctata	95.26	253	3e-112
denovo1420	Singleton	1	1	0	0	0	0	0	JN657217.1.1499_Bacteria;Proteobacteria;Gammaproteobacteria;Enterobacteriales;Enterobacteriaceae;Enterobacter;Enterobacter_sp._JC163	92.89	253	7e-98
denovo1421	Singleton	1	0	1	0	0	0	0	HM556457.1.1373_Bacteria;Proteobacteria;Gammaproteobacteria;Enterobacteriales;Enterobacteriaceae;Tatumella;uncultured_bacterium	96.44	253	2e-119
denovo1422	Singleton	1	0	0	0	1	0	0	FJ893819.1.1363_Bacteria;Proteobacteria;Gammaproteobacteria;Enterobacteriales;Enterobacteriaceae;Cedecea;uncultured_bacterium	96.44	253	2e-119
denovo1423	Singleton	1	0	0	0	0	0	1	JN194132.1.1320_Bacteria;Proteobacteria;Gammaproteobacteria;Enterobacteriales;Enterobacteriaceae;Pantoea;bacterium_MPB_JP_b	93.68	253	1e-102
denovo1424	Singleton	1	0	1	0	0	0	0	AB021400.1.1522_Bacteria;Proteobacteria;Gammaproteobacteria;Enterobacteriales;Enterobacteriaceae;Tatumella;Pseudomonas_flectens	91.3	253	2e-88
denovo1425	Singleton	1	0	0	0	1	0	0	FJ404760.1.1489_Bacteria;Proteobacteria;Gammaproteobacteria;Enterobacteriales;Enterobacteriaceae;Enterobacter;Mangrovibacter_sp._WG-1	94	250	3e-103
denovo1426	Singleton	1	0	0	0	0	1	0	JN977279.1.1533_Bacteria;Proteobacteria;Gammaproteobacteria;BD7-8_marine_group;uncultured_bacterium	95.2	250	2e-110
denovo1427	Singleton	1	0	1	0	0	0	0	DQ234105.1.1568_Bacteria;Proteobacteria;Gammaproteobacteria;Thiotrichales;Piscirickettsiaceae;uncultured;uncultured_Piscirickettsiaceae_bacterium	96.05	253	5e-117
denovo1428	Singleton	1	0	0	0	0	1	0	JN175342.1.1527_Bacteria;Proteobacteria;Gammaproteobacteria;Enterobacteriales;Enterobacteriaceae;Tatumella;Tatumella_punctata	95.26	253	3e-112
denovo1429	Singleton	1	0	0	1	0	0	0	AP009373.135026.136516_Bacteria;Cyanobacteria;Chloroplast;Draba_nemorosa	89.39	245	5e-74
denovo1430	Singleton	1	0	0	0	0	0	1	JN990099.1.1503_Bacteria;Proteobacteria;Gammaproteobacteria;Enterobacteriales;Enterobacteriaceae;Enterobacter;uncultured_bacterium	95.26	253	3e-112
denovo1431	Singleton	1	0	0	0	0	1	0	JN175342.1.1527_Bacteria;Proteobacteria;Gammaproteobacteria;Enterobacteriales;Enterobacteriaceae;Tatumella;Tatumella_punctata	95.26	253	3e-112
denovo1432	Singleton	1	1	0	0	0	0	0	JF706534.1.1396_Bacteria;Proteobacteria;Gammaproteobacteria;Enterobacteriales;Enterobacteriaceae;Erwinia;Erwinia_rhapontici	96.05	253	5e-117
denovo1433	Singleton	1	0	1	0	0	0	0	X93216.1.1495_Bacteria;Proteobacteria;Gammaproteobacteria;Enterobacteriales;Enterobacteriaceae;Raoultella;Raoultella_planticola	93.28	253	3e-100
denovo1435	Singleton	1	1	0	0	0	0	0	JN175342.1.1527_Bacteria;Proteobacteria;Gammaproteobacteria;Enterobacteriales;Enterobacteriaceae;Tatumella;Tatumella_punctata	94.47	253	2e-107
denovo1437	Singleton	1	0	1	0	0	0	0	JN175342.1.1527_Bacteria;Proteobacteria;Gammaproteobacteria;Enterobacteriales;Enterobacteriaceae;Tatumella;Tatumella_punctata	96.84	253	9e-122
denovo1438	Singleton	1	0	1	0	0	0	0	JN175342.1.1527_Bacteria;Proteobacteria;Gammaproteobacteria;Enterobacteriales;Enterobacteriaceae;Tatumella;Tatumella_punctata	95.58	249	3e-112
denovo1439	Singleton	1	0	0	0	0	0	1	EU574674.1.1439_Bacteria;Proteobacteria;Epsilonproteobacteria;Campylobacterales;Helicobacteraceae;Sulfurimonas;uncultured_bacterium	95.97	248	7e-104
denovo144	Singleton	1	0	1	0	0	0	0	JN175342.1.1527_Bacteria;Proteobacteria;Gammaproteobacteria;Enterobacteriales;Enterobacteriaceae;Tatumella;Tatumella_punctata	93.68	253	1e-102
denovo1442	Singleton	1	0	1	0	0	0	0	FJ712571.1.1409_Bacteria;Proteobacteria;Deltaproteobacteria;Desulfobacterales;Desulfobulbaceae;Desulfocapsa;uncultured_bacterium	93.28	253	3e-100
denovo1443	Singleton	1	1	0	0	0	0	0	JN175342.1.1527_Bacteria;Proteobacteria;Gammaproteobacteria;Enterobacteriales;Enterobacteriaceae;Tatumella;Tatumella_punctata	92.4	250	1e-93
denovo1445	Singleton	1	0	1	0	0	0	0	JN049601.1.1503_Bacteria;Proteobacteria;Gammaproteobacteria;Xanthomonadales;Xanthomonadaceae;Stenotrophomonas;Klebsiella_sp._Y6	95.65	253	1e-114
denovo1447	Singleton	1	0	0	0	1	0	0	JN175342.1.1527_Bacteria;Proteobacteria;Gammaproteobacteria;Enterobacteriales;Enterobacteriaceae;Tatumella;Tatumella_punctata	95.26	253	3e-112
denovo1449	Singleton	1	0	0	0	0	0	1	JN175342.1.1527_Bacteria;Proteobacteria;Gammaproteobacteria;Enterobacteriales;Enterobacteriaceae;Tatumella;Tatumella_punctata	95.26	253	3e-112
denovo145	Singleton	1	1	0	0	0	0	0	FJ195783.1.1501_Bacteria;Proteobacteria;Gammaproteobacteria;Enterobacteriales;Enterobacteriaceae;Enterobacter;uncultured_Enterobacter_sp.	93.68	253	1e-102
denovo1450	Singleton	1	0	0	0	1	0	0	X93216.1.1495_Bacteria;Proteobacteria;Gammaproteobacteria;Enterobacteriales;Enterobacteriaceae;Raoultella;Raoultella_planticola	96.84	253	9e-122
denovo1451	Singleton	1	0	0	0	0	1	0	JN175342.1.1527_Bacteria;Proteobacteria;Gammaproteobacteria;Enterobacteriales;Enterobacteriaceae;Tatumella;Tatumella_punctata	96.84	253	9e-122
denovo1453	Singleton	1	0	1	0	0	0	0	JF186041.1.1361_Bacteria;Proteobacteria;Gammaproteobacteria;Enterobacteriales;Enterobacteriaceae;Enterobacter;uncultured_bacterium	94.47	253	2e-107
denovo1454	Singleton	1	0	0	0	1	0	0	HQ691915.1.1363_Bacteria;Firmicutes;Clostridia;Clostridiales;Lachnospiraceae;uncultured;uncultured_bacterium	88.48	243	5e-68
denovo1455	Singleton	1	0	1	0	0	0	0	FJ264749.1.1514_Bacteria;Proteobacteria;Gammaproteobacteria;Xanthomonadales;Sinobacteraceae;JTB255_marine_benthic_group;uncultured_bacterium	97.23	253	4e-124
denovo1456	Singleton	1	1	0	0	0	0	0	JN175342.1.1527_Bacteria;Proteobacteria;Gammaproteobacteria;Enterobacteriales;Enterobacteriaceae;Tatumella;Tatumella_punctata	93.68	253	1e-102
denovo1457	Singleton	1	0	1	0	0	0	0	HQ190999.1.1454_Bacteria;Proteobacteria;Candidatus_Thiobios;uncultured_sediment_bacterium	94.47	253	2e-107
denovo1459	Singleton	1	0	0	0	1	0	0	JN613470.1.1451_Bacteria;Proteobacteria;Gammaproteobacteria;Enterobacteriales;Enterobacteriaceae;Enterobacter;Leclercia_sp._O-NR2	96.31	217	2e-100
denovo146	Singleton	1	1	0	0	0	0	0	AB021400.1.1522_Bacteria;Proteobacteria;Gammaproteobacteria;Enterobacteriales;Enterobacteriaceae;Tatumella;Pseudomonas_flectens	95.26	253	3e-112
denovo1460	Singleton	1	0	1	0	0	0	0	JN175342.1.1527_Bacteria;Proteobacteria;Gammaproteobacteria;Enterobacteriales;Enterobacteriaceae;Tatumella;Tatumella_punctata	95.65	253	1e-114
denovo1461	Singleton	1	1	0	0	0	0	0	JN175342.1.1527_Bacteria;Proteobacteria;Gammaproteobacteria;Enterobacteriales;Enterobacteriaceae;Tatumella;Tatumella_punctata	96.79	218	2e-103
denovo1462	Singleton	1	0	0	0	1	0	0	GU145547.1.1476_Bacteria;Proteobacteria;Epsilonproteobacteria;Campylobacterales;Helicobacteraceae;Sulfurimonas;uncultured_bacterium	94.4	250	1e-105
denovo1463	Singleton	1	0	0	0	0	1	0	JN466584.1.1273_Bacteria;Chloroflexi;Anaerolineae;Anaerolineales;Anaerolineaceae;uncultured;uncultured_organism	89.33	253	2e-76
denovo1464	Singleton	1	0	0	0	0	1	0	JN175342.1.1527_Bacteria;Proteobacteria;Gammaproteobacteria;Enterobacteriales;Enterobacteriaceae;Tatumella;Tatumella_punctata	96.36	220	4e-102
denovo1465	Singleton	1	1	0	0	0	0	0	JN175342.1.1527_Bacteria;Proteobacteria;Gammaproteobacteria;Enterobacteriales;Enterobacteriaceae;Tatumella;Tatumella_punctata	96.84	253	9e-122
denovo1466	Singleton	1	0	0	0	0	1	0	DQ129298.1.1374_Bacteria;Firmicutes;Bacilli;Bacillales;Alicyclobacillaceae;Tumebacillus;uncultured_bacterium	98.02	253	6e-129
denovo1469	Singleton	1	1	0	0	0	0	0	JN175342.1.1527_Bacteria;Proteobacteria;Gammaproteobacteria;Enterobacteriales;Enterobacteriaceae;Tatumella;Tatumella_punctata	96.44	253	2e-119
denovo147	Singleton	1	0	1	0	0	0	0	JF706534.1.1396_Bacteria;Proteobacteria;Gammaproteobacteria;Enterobacteriales;Enterobacteriaceae;Erwinia;Erwinia_rhapontici	96.44	253	2e-119
denovo1471	Singleton	1	0	0	0	0	0	1	HM557114.1.1377_Bacteria;Proteobacteria;Gammaproteobacteria;Enterobacteriales;Enterobacteriaceae;Enterobacter;uncultured_bacterium	93.28	253	3e-100
denovo1472	Singleton	1	0	0	0	0	0	1	JN175342.1.1527_Bacteria;Proteobacteria;Gammaproteobacteria;Enterobacteriales;Enterobacteriaceae;Tatumella;Tatumella_punctata	94.86	253	8e-110
denovo1473	Singleton	1	1	0	0	0	0	0	JN175342.1.1527_Bacteria;Proteobacteria;Gammaproteobacteria;Enterobacteriales;Enterobacteriaceae;Tatumella;Tatumella_punctata	93.68	253	1e-102
denovo1474	Singleton	1	0	0	0	1	0	0	EU289465.1.1506_Bacteria;Proteobacteria;Gammaproteobacteria;Enterobacteriales;Enterobacteriaceae;Trabulsiella;uncultured_bacterium	95.2	250	2e-110
denovo1476	Singleton	1	0	1	0	0	0	0	JN175342.1.1527_Bacteria;Proteobacteria;Gammaproteobacteria;Enterobacteriales;Enterobacteriaceae;Tatumella;Tatumella_punctata	96.44	253	2e-119
denovo1477	Singleton	1	0	0	0	0	0	1	GQ452899.1.1497_Bacteria;Proteobacteria;Gammaproteobacteria;Alteromonadales;Alteromonadaceae;OM60(NOR5)_clade;uncultured_gamma_proteobacterium	96.05	253	5e-117
denovo1478	Singleton	1	0	0	0	0	0	1	JN175342.1.1527_Bacteria;Proteobacteria;Gammaproteobacteria;Enterobacteriales;Enterobacteriaceae;Tatumella;Tatumella_punctata	96.44	253	2e-119
denovo1479	Singleton	1	0	0	0	1	0	0	JN175342.1.1527_Bacteria;Proteobacteria;Gammaproteobacteria;Enterobacteriales;Enterobacteriaceae;Tatumella;Tatumella_punctata	97.11	242	1e-117
denovo148	Singleton	1	0	1	0	0	0	0	JN175342.1.1527_Bacteria;Proteobacteria;Gammaproteobacteria;Enterobacteriales;Enterobacteriaceae;Tatumella;Tatumella_punctata	94.86	253	8e-110
denovo1480	Singleton	1	0	0	0	0	1	0	JN175342.1.1527_Bacteria;Proteobacteria;Gammaproteobacteria;Enterobacteriales;Enterobacteriaceae;Tatumella;Tatumella_punctata	96.84	253	9e-122
denovo1481	Singleton	1	1	0	0	0	0	0	AACY020311045.179.1696_Bacteria;Proteobacteria;Gammaproteobacteria;Oceanospirillales;OM182_clade;marine_metagenome	90.91	253	6e-86
denovo1484	Singleton	1	0	0	0	0	1	0	JN175342.1.1527_Bacteria;Proteobacteria;Gammaproteobacteria;Enterobacteriales;Enterobacteriaceae;Tatumella;Tatumella_punctata	96.05	253	5e-117
denovo1485	Singleton	1	0	1	0	0	0	0	JN175342.1.1527_Bacteria;Proteobacteria;Gammaproteobacteria;Enterobacteriales;Enterobacteriaceae;Tatumella;Tatumella_punctata	95.65	253	1e-114
denovo1486	Singleton	1	0	0	0	0	1	0	JN049601.1.1503_Bacteria;Proteobacteria;Gammaproteobacteria;Xanthomonadales;Xanthomonadaceae;Stenotrophomonas;Klebsiella_sp._Y6	95.26	253	3e-112
denovo1487	Singleton	1	0	0	1	0	0	0	JN990099.1.1503_Bacteria;Proteobacteria;Gammaproteobacteria;Enterobacteriales;Enterobacteriaceae;Enterobacter;uncultured_bacterium	94.47	253	2e-107
denovo1489	Singleton	1	0	0	0	1	0	0	JF104371.1.1351_Bacteria;Proteobacteria;Gammaproteobacteria;Cardiobacteriales;Cardiobacteriaceae;uncultured;uncultured_bacterium	94.07	253	5e-105
denovo149	Singleton	1	0	1	0	0	0	0	JN175342.1.1527_Bacteria;Proteobacteria;Gammaproteobacteria;Enterobacteriales;Enterobacteriaceae;Tatumella;Tatumella_punctata	94.07	253	5e-105
denovo1490	Singleton	1	0	0	1	0	0	0	GQ348323.1.1382_Bacteria;Proteobacteria;Gammaproteobacteria;Oceanospirillales;Oceanospirillaceae;Reinekea;uncultured_gamma_proteobacterium	93.28	253	3e-100
denovo1491	Singleton	1	0	0	1	0	0	0	JN977296.1.1524_Bacteria;Proteobacteria;Deltaproteobacteria;Desulfuromonadales;Desulfuromonadaceae;Desulfuromusa;uncultured_bacterium	97.23	253	4e-124
denovo1492	Singleton	1	0	0	1	0	0	0	FJ516918.1.1484_Bacteria;Bacteroidetes;SB-5;uncultured_Cytophagales_bacterium	95.26	253	3e-112
denovo1494	Singleton	1	0	0	1	0	0	0	HM142462.1.1429_Bacteria;Proteobacteria;Alphaproteobacteria;Rickettsiales;SAR116_clade;uncultured_bacterium	96.84	253	9e-122
denovo1495	Singleton	1	0	1	0	0	0	0	DQ831539.1.1518_Bacteria;Proteobacteria;Deltaproteobacteria;Desulfobacterales;Desulfobacteraceae;Desulfococcus;uncultured_delta_proteobacterium	98.81	253	1e-133
denovo1496	Singleton	1	0	0	0	0	0	1	JN175342.1.1527_Bacteria;Proteobacteria;Gammaproteobacteria;Enterobacteriales;Enterobacteriaceae;Tatumella;Tatumella_punctata	95.65	253	1e-114
denovo1498	Singleton	1	0	0	0	1	0	0	JN175342.1.1527_Bacteria;Proteobacteria;Gammaproteobacteria;Enterobacteriales;Enterobacteriaceae;Tatumella;Tatumella_punctata	96.41	251	3e-118
denovo1499	Singleton	1	0	1	0	0	0	0	FJ404760.1.1489_Bacteria;Proteobacteria;Gammaproteobacteria;Enterobacteriales;Enterobacteriaceae;Enterobacter;Mangrovibacter_sp._WG-1	93.68	253	1e-102
denovo15	Singleton	1	0	0	1	0	0	0	JF344452.1.1488_Bacteria;Bacteroidetes;Bacteroidia;Bacteroidales;Marinilabiaceae;uncultured;uncultured_Bacteroidetes_bacterium	95.26	253	3e-112
denovo150	Singleton	1	0	1	0	0	0	0	JF706534.1.1396_Bacteria;Proteobacteria;Gammaproteobacteria;Enterobacteriales;Enterobacteriaceae;Erwinia;Erwinia_rhapontici	96.44	253	2e-119
denovo1500	Singleton	1	0	0	0	1	0	0	Z96078.1.1495_Bacteria;Proteobacteria;Gammaproteobacteria;Enterobacteriales;Enterobacteriaceae;Enterobacter;Enterobacter_cancerogenus	95.26	253	3e-100
denovo1501	Singleton	1	1	0	0	0	0	0	JF706534.1.1396_Bacteria;Proteobacteria;Gammaproteobacteria;Enterobacteriales;Enterobacteriaceae;Erwinia;Erwinia_rhapontici	97.23	253	4e-124
denovo1503	Singleton	1	0	0	0	0	1	0	HQ916532.1.1405_Bacteria;Proteobacteria;Gammaproteobacteria;Order_Incertae_Sedis;Family_Incertae_Sedis;Thiohalophilus;uncultured_bacterium	93.28	253	3e-100
denovo1504	Singleton	1	0	1	0	0	0	0	JN613470.1.1451_Bacteria;Proteobacteria;Gammaproteobacteria;Enterobacteriales;Enterobacteriaceae;Enterobacter;Leclercia_sp._O-NR2	93.68	253	1e-102
denovo1505	Singleton	1	0	0	1	0	0	0	JN860320.1.1532_Bacteria;Proteobacteria;Deltaproteobacteria;Desulfobacterales;Desulfobacteraceae;SEEP-SRB1;uncultured_Desulfobacteraceae_bacterium	98.78	245	6e-129
denovo1506	Singleton	1	1	0	0	0	0	0	JN990099.1.1503_Bacteria;Proteobacteria;Gammaproteobacteria;Enterobacteriales;Enterobacteriaceae;Enterobacter;uncultured_bacterium	95.65	253	1e-114
denovo1507	Singleton	1	0	0	0	0	0	1	JN175342.1.1527_Bacteria;Proteobacteria;Gammaproteobacteria;Enterobacteriales;Enterobacteriaceae;Tatumella;Tatumella_punctata	95.65	253	1e-114
denovo1508	Singleton	1	0	0	0	0	0	1	JN175342.1.1527_Bacteria;Proteobacteria;Gammaproteobacteria;Enterobacteriales;Enterobacteriaceae;Tatumella;Tatumella_punctata	96.84	253	9e-122
denovo1509	Singleton	1	0	1	0	0	0	0	JF706534.1.1396_Bacteria;Proteobacteria;Gammaproteobacteria;Enterobacteriales;Enterobacteriaceae;Erwinia;Erwinia_rhapontici	96.44	253	2e-119
denovo151	Singleton	1	0	0	1	0	0	0	JN175342.1.1527_Bacteria;Proteobacteria;Gammaproteobacteria;Enterobacteriales;Enterobacteriaceae;Tatumella;Tatumella_punctata	96.05	253	5e-117
denovo1510	Singleton	1	0	1	0	0	0	0	HQ191058.1.1498_Bacteria;Proteobacteria;Gammaproteobacteria;BD7-8_marine_group;uncultured_sediment_bacterium	95.26	253	3e-112
denovo1511	Singleton	1	0	0	0	0	0	1	JN175342.1.1527_Bacteria;Proteobacteria;Gammaproteobacteria;Enterobacteriales;Enterobacteriaceae;Tatumella;Tatumella_punctata	93.28	253	3e-100
denovo1514	Singleton	1	0	1	0	0	0	0	EU491798.1.1466_Bacteria;Proteobacteria;Gammaproteobacteria;Oceanospirillales;Alcanivoracaceae;Kangiella;uncultured_bacterium	94.4	250	1e-105
denovo1515	Singleton	1	1	0	0	0	0	0	JN175342.1.1527_Bacteria;Proteobacteria;Gammaproteobacteria;Enterobacteriales;Enterobacteriaceae;Tatumella;Tatumella_punctata	92.89	253	7e-98
denovo1517	Singleton	1	1	0	0	0	0	0	JN175342.1.1527_Bacteria;Proteobacteria;Gammaproteobacteria;Enterobacteriales;Enterobacteriaceae;Tatumella;Tatumella_punctata	96.05	253	5e-117
denovo1518	Singleton	1	0	0	0	1	0	0	JN435985.1.1397_Bacteria;Proteobacteria;Gammaproteobacteria;NKB5;uncultured_organism	93.58	218	1e-86
denovo152	Singleton	1	1	0	0	0	0	0	JN977155.1.1529_Bacteria;Proteobacteria;Gammaproteobacteria;Chromatiales;Granulosicoccaceae;Granulosicoccus;uncultured_bacterium	94.07	253	5e-105
denovo1521	Singleton	1	0	0	0	0	1	0	FJ404760.1.1489_Bacteria;Proteobacteria;Gammaproteobacteria;Enterobacteriales;Enterobacteriaceae;Enterobacter;Mangrovibacter_sp._WG-1	93.28	253	3e-100
denovo1522	Singleton	1	0	1	0	0	0	0	JN175342.1.1527_Bacteria;Proteobacteria;Gammaproteobacteria;Enterobacteriales;Enterobacteriaceae;Tatumella;Tatumella_punctata	95.65	253	1e-114
denovo1523	Singleton	1	0	1	0	0	0	0	JN175342.1.1527_Bacteria;Proteobacteria;Gammaproteobacteria;Enterobacteriales;Enterobacteriaceae;Tatumella;Tatumella_punctata	96.84	253	9e-122
denovo1524	Singleton	1	0	1	0	0	0	0	GU584306.1.1398_Bacteria;Proteobacteria;Gammaproteobacteria;Thiotrichales;Piscirickettsiaceae;uncultured;uncultured_bacterium	97.23	253	4e-124
denovo1526	Singleton	1	0	0	0	0	0	1	JF706534.1.1396_Bacteria;Proteobacteria;Gammaproteobacteria;Enterobacteriales;Enterobacteriaceae;Erwinia;Erwinia_rhapontici	95.26	253	3e-112
denovo1527	Singleton	1	1	0	0	0	0	0	JN391562.1.1509_Bacteria;Proteobacteria;Gammaproteobacteria;Aeromonadales;Aeromonadaceae;Tolumonas;uncultured_bacterium	94.07	253	5e-105
denovo1528	Singleton	1	0	0	0	1	0	0	JF706534.1.1396_Bacteria;Proteobacteria;Gammaproteobacteria;Enterobacteriales;Enterobacteriaceae;Erwinia;Erwinia_rhapontici	97.23	253	4e-124
denovo1529	Singleton	1	0	0	1	0	0	0	FJ382922.1.1395_Bacteria;Proteobacteria;Betaproteobacteria;Burkholderiales;Oxalobacteraceae;Herminiimonas;uncultured_bacterium	94.47	253	2e-107
denovo1530	Singleton	1	0	0	1	0	0	0	JN175342.1.1527_Bacteria;Proteobacteria;Gammaproteobacteria;Enterobacteriales;Enterobacteriaceae;Tatumella;Tatumella_punctata	96.8	250	6e-120
denovo1531	Singleton	1	0	0	0	0	0	1	JN175342.1.1527_Bacteria;Proteobacteria;Gammaproteobacteria;Enterobacteriales;Enterobacteriaceae;Tatumella;Tatumella_punctata	96.05	253	5e-105
denovo1532	Singleton	1	0	1	0	0	0	0	JN990099.1.1503_Bacteria;Proteobacteria;Gammaproteobacteria;Enterobacteriales;Enterobacteriaceae;Enterobacter;uncultured_bacterium	94.86	253	8e-110
denovo1534	Singleton	1	1	0	0	0	0	0	JN175342.1.1527_Bacteria;Proteobacteria;Gammaproteobacteria;Enterobacteriales;Enterobacteriaceae;Tatumella;Tatumella_punctata	96.4	250	1e-117
denovo1536	Singleton	1	0	0	1	0	0	0	JN662041.1.1403_Bacteria;Proteobacteria;Epsilonproteobacteria;Campylobacterales;Helicobacteraceae;Sulfurovum;uncultured_proteobacterium	93.68	253	1e-102
denovo1537	Singleton	1	0	0	0	1	0	0	JN175342.1.1527_Bacteria;Proteobacteria;Gammaproteobacteria;Enterobacteriales;Enterobacteriaceae;Tatumella;Tatumella_punctata	97.21	215	6e-104
denovo1538	Singleton	1	0	0	0	1	0	0	JN977155.1.1529_Bacteria;Proteobacteria;Gammaproteobacteria;Chromatiales;Granulosicoccaceae;Granulosicoccus;uncultured_bacterium	92.89	253	7e-98
denovo1540	Singleton	1	1	0	0	0	0	0	GQ417409.1.1465_Bacteria;Proteobacteria;Gammaproteobacteria;Enterobacteriales;Enterobacteriaceae;Citrobacter;uncultured_Citrobacter_sp.	95.26	253	3e-112
denovo1541	Singleton	1	0	0	0	0	0	1	EF509905.1.1477_Bacteria;Proteobacteria;Gammaproteobacteria;Enterobacteriales;Enterobacteriaceae;Klebsiella;uncultured_bacterium	92.89	253	7e-98
denovo1542	Singleton	1	0	1	0	0	0	0	JN175342.1.1527_Bacteria;Proteobacteria;Gammaproteobacteria;Enterobacteriales;Enterobacteriaceae;Tatumella;Tatumella_punctata	95.65	253	1e-114
denovo1543	Singleton	1	0	0	0	0	0	1	JN175342.1.1527_Bacteria;Proteobacteria;Gammaproteobacteria;Enterobacteriales;Enterobacteriaceae;Tatumella;Tatumella_punctata	95.65	253	1e-114
denovo1544	Singleton	1	0	0	0	0	1	0	JN175342.1.1527_Bacteria;Proteobacteria;Gammaproteobacteria;Enterobacteriales;Enterobacteriaceae;Tatumella;Tatumella_punctata	96.84	253	9e-122
denovo1545	Singleton	1	1	0	0	0	0	0	HQ153883.1.1390_Bacteria;Proteobacteria;Gammaproteobacteria;Chromatiales;Granulosicoccaceae;Granulosicoccus;uncultured_bacterium	94.86	253	8e-110
denovo1546	Singleton	1	0	0	0	0	0	1	JN175342.1.1527_Bacteria;Proteobacteria;Gammaproteobacteria;Enterobacteriales;Enterobacteriaceae;Tatumella;Tatumella_punctata	94.07	253	5e-105
denovo1547	Singleton	1	1	0	0	0	0	0	FN554097.1.1482_Bacteria;Bacteroidetes;BD2-2;uncultured_sediment_bacterium	97.41	193	3e-93
denovo1548	Singleton	1	0	1	0	0	0	0	X70953.1.1555_Bacteria;Proteobacteria;Deltaproteobacteria;Desulfobacterales;Desulfobacteraceae;Desulfobacula;Desulfobacula_toluolica	96	250	3e-115
denovo1549	Singleton	1	0	1	0	0	0	0	JN990099.1.1503_Bacteria;Proteobacteria;Gammaproteobacteria;Enterobacteriales;Enterobacteriaceae;Enterobacter;uncultured_bacterium	96.79	218	2e-103
denovo155	Singleton	1	0	1	0	0	0	0	JN990099.1.1503_Bacteria;Proteobacteria;Gammaproteobacteria;Enterobacteriales;Enterobacteriaceae;Enterobacter;uncultured_bacterium	96.44	253	2e-119
denovo1550	Singleton	1	0	0	0	1	0	0	X80775.1.1448_Bacteria;Proteobacteria;Alphaproteobacteria;Rhodospirillales;Acetobacteraceae;Gluconobacter;Gluconobacter_cerinus	96.8	219	6e-104
denovo1552	Singleton	1	0	1	0	0	0	0	JN194132.1.1320_Bacteria;Proteobacteria;Gammaproteobacteria;Enterobacteriales;Enterobacteriaceae;Pantoea;bacterium_MPB_JP_b	96.05	253	5e-117
denovo1553	Singleton	1	0	0	0	1	0	0	X80775.1.1448_Bacteria;Proteobacteria;Alphaproteobacteria;Rhodospirillales;Acetobacteraceae;Gluconobacter;Gluconobacter_cerinus	94.47	253	2e-107
denovo1554	Singleton	1	0	0	0	0	0	1	DQ351745.1.1482_Bacteria;Bacteroidetes;Sphingobacteriia;Sphingobacteriales;WCHB1-69;uncultured_Bacteroidetes_bacterium	99.54	217	5e-117
denovo1555	Singleton	1	0	1	0	0	0	0	JN194132.1.1320_Bacteria;Proteobacteria;Gammaproteobacteria;Enterobacteriales;Enterobacteriaceae;Pantoea;bacterium_MPB_JP_b	96.05	253	5e-117
denovo1556	Singleton	1	1	0	0	0	0	0	JN175342.1.1527_Bacteria;Proteobacteria;Gammaproteobacteria;Enterobacteriales;Enterobacteriaceae;Tatumella;Tatumella_punctata	96.84	253	9e-122
denovo1557	Singleton	1	0	1	0	0	0	0	HM558240.1.1372_Bacteria;Proteobacteria;Gammaproteobacteria;Enterobacteriales;Enterobacteriaceae;Tatumella;uncultured_bacterium	97.23	253	4e-124
denovo1558	Singleton	1	0	1	0	0	0	0	X70953.1.1555_Bacteria;Proteobacteria;Deltaproteobacteria;Desulfobacterales;Desulfobacteraceae;Desulfobacula;Desulfobacula_toluolica	96.44	253	2e-119
denovo1560	Singleton	1	0	0	0	0	0	1	JN990099.1.1503_Bacteria;Proteobacteria;Gammaproteobacteria;Enterobacteriales;Enterobacteriaceae;Enterobacter;uncultured_bacterium	95.65	253	1e-114
denovo1561	Singleton	1	0	0	1	0	0	0	JN175342.1.1527_Bacteria;Proteobacteria;Gammaproteobacteria;Enterobacteriales;Enterobacteriaceae;Tatumella;Tatumella_punctata	95.65	253	1e-114
denovo1564	Singleton	1	0	0	0	1	0	0	X80775.1.1448_Bacteria;Proteobacteria;Alphaproteobacteria;Rhodospirillales;Acetobacteraceae;Gluconobacter;Gluconobacter_cerinus	95.26	253	3e-112
denovo1565	Singleton	1	1	0	0	0	0	0	JN175342.1.1527_Bacteria;Proteobacteria;Gammaproteobacteria;Enterobacteriales;Enterobacteriaceae;Tatumella;Tatumella_punctata	94.86	253	8e-110
denovo1567	Singleton	1	0	0	0	0	1	0	JN175342.1.1527_Bacteria;Proteobacteria;Gammaproteobacteria;Enterobacteriales;Enterobacteriaceae;Tatumella;Tatumella_punctata	93.68	253	1e-102
denovo1568	Singleton	1	0	0	0	0	1	0	JN175342.1.1527_Bacteria;Proteobacteria;Gammaproteobacteria;Enterobacteriales;Enterobacteriaceae;Tatumella;Tatumella_punctata	96.44	253	2e-119
denovo1569	Singleton	1	1	0	0	0	0	0	JN175342.1.1527_Bacteria;Proteobacteria;Gammaproteobacteria;Enterobacteriales;Enterobacteriaceae;Tatumella;Tatumella_punctata	96.44	253	2e-119
denovo157	Singleton	1	0	1	0	0	0	0	JN035217.1.1416_Bacteria;Proteobacteria;Gammaproteobacteria;Aeromonadales;Aeromonadaceae;Aeromonas;bacterium_SUTW_73	93.28	253	2e-88
denovo1570	Singleton	1	1	0	0	0	0	0	FJ196001.1.1446_Bacteria;Proteobacteria;Alphaproteobacteria;Rhodobacterales;Rhodobacteraceae;Pseudorhodobacter;Rhodobacter_sp._ZS3-13	91.3	253	2e-88
denovo1571	Singleton	1	1	0	0	0	0	0	JN175342.1.1527_Bacteria;Proteobacteria;Gammaproteobacteria;Enterobacteriales;Enterobacteriaceae;Tatumella;Tatumella_punctata	96.84	253	9e-122
denovo1572	Singleton	1	0	0	0	0	0	1	X82290.1.1476_Bacteria;Proteobacteria;Alphaproteobacteria;Rhodospirillales;Acetobacteraceae;Gluconobacter;Gluconobacter_frateurii	92.89	253	7e-98
denovo1573	Singleton	1	0	1	0	0	0	0	FN869533.1.1410_Bacteria;Proteobacteria;Gammaproteobacteria;Order_Incertae_Sedis;Family_Incertae_Sedis;Sedimenticola;Myrtea_tanimbarensis_gill_endosymbiont	94.47	253	2e-107
denovo1574	Singleton	1	1	0	0	0	0	0	FJ404760.1.1489_Bacteria;Proteobacteria;Gammaproteobacteria;Enterobacteriales;Enterobacteriaceae;Enterobacter;Mangrovibacter_sp._WG-1	94.07	253	5e-105
denovo1575	Singleton	1	0	0	0	1	0	0	X80775.1.1448_Bacteria;Proteobacteria;Alphaproteobacteria;Rhodospirillales;Acetobacteraceae;Gluconobacter;Gluconobacter_cerinus	95.65	253	1e-114
denovo1577	Singleton	1	0	1	0	0	0	0	JN175342.1.1527_Bacteria;Proteobacteria;Gammaproteobacteria;Enterobacteriales;Enterobacteriaceae;Tatumella;Tatumella_punctata	95.26	253	3e-112
denovo158	Singleton	1	0	1	0	0	0	0	JN175342.1.1527_Bacteria;Proteobacteria;Gammaproteobacteria;Enterobacteriales;Enterobacteriaceae;Tatumella;Tatumella_punctata	96.05	253	5e-117
denovo1580	Singleton	1	1	0	0	0	0	0	JF706534.1.1396_Bacteria;Proteobacteria;Gammaproteobacteria;Enterobacteriales;Enterobacteriaceae;Erwinia;Erwinia_rhapontici	96.84	253	9e-122
denovo1581	Singleton	1	0	1	0	0	0	0	EU512011.1.1361_Bacteria;Proteobacteria;Gammaproteobacteria;Pseudomonadales;Pseudomonadaceae;Pseudomonas;uncultured_bacterium	94.47	253	2e-107
denovo1583	Singleton	1	0	1	0	0	0	0	JN175342.1.1527_Bacteria;Proteobacteria;Gammaproteobacteria;Enterobacteriales;Enterobacteriaceae;Tatumella;Tatumella_punctata	96.33	218	6e-101
denovo1584	Singleton	1	1	0	0	0	0	0	JN175342.1.1527_Bacteria;Proteobacteria;Gammaproteobacteria;Enterobacteriales;Enterobacteriaceae;Tatumella;Tatumella_punctata	95.65	253	1e-114
denovo1585	Singleton	1	0	0	0	0	1	0	JN175342.1.1527_Bacteria;Proteobacteria;Gammaproteobacteria;Enterobacteriales;Enterobacteriaceae;Tatumella;Tatumella_punctata	96.84	253	9e-122
denovo1586	Singleton	1	0	0	1	0	0	0	HE589869.1.1460_Bacteria;Proteobacteria;Gammaproteobacteria;Enterobacteriales;Enterobacteriaceae;Escherichia-Shigella;uncultured_bacterium	94.86	253	8e-110
denovo1587	Singleton	1	0	0	0	1	0	0	X80775.1.1448_Bacteria;Proteobacteria;Alphaproteobacteria;Rhodospirillales;Acetobacteraceae;Gluconobacter;Gluconobacter_cerinus	95.83	240	3e-109
denovo1588	Singleton	1	0	0	0	1	0	0	GU356223.1.1318_Bacteria;Proteobacteria;Gammaproteobacteria;Aeromonadales;Aeromonadaceae;Aeromonas;uncultured_Aeromonas_sp.	94.47	253	2e-107
denovo159	Singleton	1	1	0	0	0	0	0	JN990099.1.1503_Bacteria;Proteobacteria;Gammaproteobacteria;Enterobacteriales;Enterobacteriaceae;Enterobacter;uncultured_bacterium	96.84	253	9e-122
denovo1590	Singleton	1	0	1	0	0	0	0	JN175342.1.1527_Bacteria;Proteobacteria;Gammaproteobacteria;Enterobacteriales;Enterobacteriaceae;Tatumella;Tatumella_punctata	95.26	253	3e-112
denovo1591	Singleton	1	1	0	0	0	0	0	FJ628326.1.1517_Bacteria;Proteobacteria;Gammaproteobacteria;Xanthomonadales;Sinobacteraceae;JTB255_marine_benthic_group;uncultured_bacterium	95.26	253	3e-112
denovo1592	Singleton	1	0	1	0	0	0	0	JF706534.1.1396_Bacteria;Proteobacteria;Gammaproteobacteria;Enterobacteriales;Enterobacteriaceae;Erwinia;Erwinia_rhapontici	96.05	253	5e-117
denovo1593	Singleton	1	0	0	0	1	0	0	X80775.1.1448_Bacteria;Proteobacteria;Alphaproteobacteria;Rhodospirillales;Acetobacteraceae;Gluconobacter;Gluconobacter_cerinus	95.45	242	5e-108
denovo1594	Singleton	1	0	1	0	0	0	0	GU584306.1.1398_Bacteria;Proteobacteria;Gammaproteobacteria;Thiotrichales;Piscirickettsiaceae;uncultured;uncultured_bacterium	93.28	253	3e-100
denovo1595	Singleton	1	0	0	0	0	1	0	JN990099.1.1503_Bacteria;Proteobacteria;Gammaproteobacteria;Enterobacteriales;Enterobacteriaceae;Enterobacter;uncultured_bacterium	94.86	253	8e-110
denovo1596	Singleton	1	0	1	0	0	0	0	HQ787613.1.1473_Bacteria;Proteobacteria;Gammaproteobacteria;Enterobacteriales;Enterobacteriaceae;Enterobacter;uncultured_organism	98.02	252	2e-128
denovo1597	Singleton	1	0	1	0	0	0	0	GQ497246.1.1596_Bacteria;Proteobacteria;Gammaproteobacteria;Enterobacteriales;Enterobacteriaceae;Klebsiella;Klebsiella_sp._A4-1	96.8	250	6e-120
denovo1598	Singleton	1	0	0	0	0	0	1	DQ831556.1.1504_Bacteria;Proteobacteria;Deltaproteobacteria;Desulfobacterales;Desulfobulbaceae;Desulfopila;uncultured_Desulfocapsa_sp.	92.52	254	1e-93
denovo1599	Singleton	1	0	1	0	0	0	0	FJ203269.1.1406_Bacteria;Cyanobacteria;Chloroplast;uncultured_bacterium	98.42	253	3e-131
denovo16	Singleton	1	1	0	0	0	0	0	HM558240.1.1372_Bacteria;Proteobacteria;Gammaproteobacteria;Enterobacteriales;Enterobacteriaceae;Tatumella;uncultured_bacterium	96.05	253	5e-117
denovo1600	Singleton	1	0	1	0	0	0	0	FN429792.1.1506_Bacteria;Proteobacteria;Deltaproteobacteria;Desulfobacterales;Desulfobulbaceae;uncultured;uncultured_delta_proteobacterium	94.47	253	2e-107
denovo1602	Singleton	1	1	0	0	0	0	0	JN175342.1.1527_Bacteria;Proteobacteria;Gammaproteobacteria;Enterobacteriales;Enterobacteriaceae;Tatumella;Tatumella_punctata	92.89	253	7e-98
denovo1603	Singleton	1	0	0	0	0	1	0	GQ417303.1.1463_Bacteria;Proteobacteria;Gammaproteobacteria;Enterobacteriales;Enterobacteriaceae;Klebsiella;uncultured_Klebsiella_sp.	96	250	3e-115
denovo1604	Singleton	1	0	0	1	0	0	0	DQ068818.1.1506_Bacteria;Proteobacteria;Gammaproteobacteria;Enterobacteriales;Enterobacteriaceae;Citrobacter;uncultured_bacterium	96.05	253	5e-117
denovo1605	Singleton	1	0	1	0	0	0	0	JN175342.1.1527_Bacteria;Proteobacteria;Gammaproteobacteria;Enterobacteriales;Enterobacteriaceae;Tatumella;Tatumella_punctata	94.86	253	1e-99
denovo1606	Singleton	1	0	1	0	0	0	0	JN613470.1.1451_Bacteria;Proteobacteria;Gammaproteobacteria;Enterobacteriales;Enterobacteriaceae;Enterobacter;Leclercia_sp._O-NR2	94.47	253	2e-107
denovo1607	Singleton	1	0	0	0	0	1	0	HM558240.1.1372_Bacteria;Proteobacteria;Gammaproteobacteria;Enterobacteriales;Enterobacteriaceae;Tatumella;uncultured_bacterium	97.23	253	4e-124
denovo1608	Singleton	1	1	0	0	0	0	0	JN175342.1.1527_Bacteria;Proteobacteria;Gammaproteobacteria;Enterobacteriales;Enterobacteriaceae;Tatumella;Tatumella_punctata	96.84	253	9e-122
denovo1609	Singleton	1	0	0	0	0	0	1	HQ204289.1.1501_Bacteria;Proteobacteria;Gammaproteobacteria;Enterobacteriales;Enterobacteriaceae;Klebsiella;bacterium_QZ33S	95.26	253	3e-112
denovo161	Singleton	1	1	0	0	0	0	0	JN175342.1.1527_Bacteria;Proteobacteria;Gammaproteobacteria;Enterobacteriales;Enterobacteriaceae;Tatumella;Tatumella_punctata	95.65	253	1e-114
denovo1610	Singleton	1	0	0	0	1	0	0	GQ347322.1.1359_Bacteria;Proteobacteria;Gammaproteobacteria;Alteromonadales;Alteromonadaceae;OM60(NOR5)_clade;uncultured_gamma_proteobacterium	96.44	253	2e-119
denovo1611	Singleton	1	1	0	0	0	0	0	JQ318909.1.1370_Bacteria;Proteobacteria;Gammaproteobacteria;Enterobacteriales;Enterobacteriaceae;Erwinia;uncultured_Erwinia_sp.	95.26	253	3e-112
denovo1612	Singleton	1	0	1	0	0	0	0	GQ872422.1.1463_Bacteria;Proteobacteria;Gammaproteobacteria;Alteromonadales;Alteromonadaceae;Simiduia;Simiduia_areninigrae	94.47	253	2e-107
denovo1613	Singleton	1	0	0	0	0	0	1	JN175342.1.1527_Bacteria;Proteobacteria;Gammaproteobacteria;Enterobacteriales;Enterobacteriaceae;Tatumella;Tatumella_punctata	96.05	253	5e-117
denovo1614	Singleton	1	0	0	0	0	0	1	GQ349203.1.1382_Bacteria;Proteobacteria;Gammaproteobacteria;Oceanospirillales;Oceanospirillaceae;Pseudospirillum;uncultured_gamma_proteobacterium	94.09	254	3e-103
denovo1615	Singleton	1	0	1	0	0	0	0	JF706534.1.1396_Bacteria;Proteobacteria;Gammaproteobacteria;Enterobacteriales;Enterobacteriaceae;Erwinia;Erwinia_rhapontici	96.44	253	2e-119
denovo1616	Singleton	1	0	1	0	0	0	0	AY942761.1.1415_Bacteria;Proteobacteria;Gammaproteobacteria;Oceanospirillales;Oceanospirillaceae;Pseudospirillum;uncultured_bacterium	94.86	253	8e-110
denovo1617	Singleton	1	0	1	0	0	0	0	JN175342.1.1527_Bacteria;Proteobacteria;Gammaproteobacteria;Enterobacteriales;Enterobacteriaceae;Tatumella;Tatumella_punctata	96.33	245	1e-114
denovo1618	Singleton	1	1	0	0	0	0	0	JQ245601.1.1387_Bacteria;Proteobacteria;Deltaproteobacteria;Desulfuromonadales;Desulfuromonadaceae;Desulfuromusa;uncultured_bacterium	94.47	253	2e-107
denovo1619	Singleton	1	0	0	0	0	0	1	JN175342.1.1527_Bacteria;Proteobacteria;Gammaproteobacteria;Enterobacteriales;Enterobacteriaceae;Tatumella;Tatumella_punctata	96.05	253	5e-117
denovo162	Singleton	1	0	1	0	0	0	0	JN990093.1.1541_Bacteria;Proteobacteria;Gammaproteobacteria;Enterobacteriales;Enterobacteriaceae;Enterobacter;uncultured_Pantoea_sp.	92.49	253	2e-95
denovo1620	Singleton	1	0	1	0	0	0	0	GQ249562.1.1529_Bacteria;Proteobacteria;Deltaproteobacteria;Desulfuromonadales;Sva1033;uncultured_delta_proteobacterium	97.63	253	2e-126
denovo1621	Singleton	1	0	0	0	0	1	0	HM558240.1.1372_Bacteria;Proteobacteria;Gammaproteobacteria;Enterobacteriales;Enterobacteriaceae;Tatumella;uncultured_bacterium	96.84	253	9e-122
denovo1623	Singleton	1	0	0	0	1	0	0	X80775.1.1448_Bacteria;Proteobacteria;Alphaproteobacteria;Rhodospirillales;Acetobacteraceae;Gluconobacter;Gluconobacter_cerinus	94.47	253	2e-107
denovo1625	Singleton	1	0	0	0	0	0	1	HM558240.1.1372_Bacteria;Proteobacteria;Gammaproteobacteria;Enterobacteriales;Enterobacteriaceae;Tatumella;uncultured_bacterium	97.23	253	4e-124
denovo1626	Singleton	1	0	0	0	1	0	0	JF104371.1.1351_Bacteria;Proteobacteria;Gammaproteobacteria;Cardiobacteriales;Cardiobacteriaceae;uncultured;uncultured_bacterium	98.02	253	6e-129
denovo1627	Singleton	1	1	0	0	0	0	0	JN175342.1.1527_Bacteria;Proteobacteria;Gammaproteobacteria;Enterobacteriales;Enterobacteriaceae;Tatumella;Tatumella_punctata	94.86	253	8e-110
denovo1628	Singleton	1	0	0	0	0	1	0	DQ676357.1.1422_Bacteria;Proteobacteria;Gammaproteobacteria;Order_Incertae_Sedis;Family_Incertae_Sedis;Arenicella;uncultured_gamma_proteobacterium	95.65	253	1e-114
denovo1629	Singleton	1	0	1	0	0	0	0	GU356230.1.1377_Bacteria;Proteobacteria;Gammaproteobacteria;Aeromonadales;Aeromonadaceae;Aeromonas;uncultured_Aeromonas_sp.	92.89	253	7e-98
denovo163	Singleton	1	1	0	0	0	0	0	JN175342.1.1527_Bacteria;Proteobacteria;Gammaproteobacteria;Enterobacteriales;Enterobacteriaceae;Tatumella;Tatumella_punctata	96.44	253	2e-119
denovo1630	Singleton	1	0	1	0	0	0	0	JN175342.1.1527_Bacteria;Proteobacteria;Gammaproteobacteria;Enterobacteriales;Enterobacteriaceae;Tatumella;Tatumella_punctata	96.84	253	9e-122
denovo1631	Singleton	1	0	1	0	0	0	0	JN175342.1.1527_Bacteria;Proteobacteria;Gammaproteobacteria;Enterobacteriales;Enterobacteriaceae;Tatumella;Tatumella_punctata	95.65	253	1e-114
denovo1632	Singleton	1	0	1	0	0	0	0	Z96078.1.1495_Bacteria;Proteobacteria;Gammaproteobacteria;Enterobacteriales;Enterobacteriaceae;Enterobacter;Enterobacter_cancerogenus	95.26	253	3e-100
denovo1633	Singleton	1	0	0	0	0	1	0	AM882637.1.1515_Bacteria;Proteobacteria;Deltaproteobacteria;Sh765B-TzT-29;uncultured_delta_proteobacterium	100	253	7e-141
denovo1634	Singleton	1	1	0	0	0	0	0	GU584410.1.1396_Bacteria;Proteobacteria;Gammaproteobacteria;Thiotrichales;Piscirickettsiaceae;uncultured;uncultured_bacterium	90.51	253	1e-83
denovo1635	Singleton	1	0	0	0	1	0	0	X80775.1.1448_Bacteria;Proteobacteria;Alphaproteobacteria;Rhodospirillales;Acetobacteraceae;Gluconobacter;Gluconobacter_cerinus	96.77	217	9e-103
denovo1636	Singleton	1	0	0	0	0	0	1	JN194132.1.1320_Bacteria;Proteobacteria;Gammaproteobacteria;Enterobacteriales;Enterobacteriaceae;Pantoea;bacterium_MPB_JP_b	96.44	253	2e-119
denovo1637	Singleton	1	0	1	0	0	0	0	JN175342.1.1527_Bacteria;Proteobacteria;Gammaproteobacteria;Enterobacteriales;Enterobacteriaceae;Tatumella;Tatumella_punctata	92.89	253	7e-98
denovo1638	Singleton	1	0	0	0	0	1	0	JN175342.1.1527_Bacteria;Proteobacteria;Gammaproteobacteria;Enterobacteriales;Enterobacteriaceae;Tatumella;Tatumella_punctata	94.93	217	3e-93
denovo1639	Singleton	1	0	0	1	0	0	0	JF747844.1.1519_Bacteria;Proteobacteria;Deltaproteobacteria;Desulfobacterales;Desulfobulbaceae;Desulfocapsa;uncultured_bacterium	93.28	253	3e-100
denovo164	Singleton	1	0	0	0	0	0	1	JN175342.1.1527_Bacteria;Proteobacteria;Gammaproteobacteria;Enterobacteriales;Enterobacteriaceae;Tatumella;Tatumella_punctata	96.84	253	9e-122
denovo1640	Singleton	1	0	0	0	1	0	0	FN869544.1.1438_Bacteria;Proteobacteria;Gammaproteobacteria;Order_Incertae_Sedis;Family_Incertae_Sedis;Sedimenticola;Myrtea_flabelliformis_gill_endosymbiont	96.05	253	5e-117
denovo1641	Singleton	1	0	1	0	0	0	0	EU409601.1.1482_Bacteria;Proteobacteria;Alphaproteobacteria;Rhodospirillales;Acetobacteraceae;uncultured;Commensalibacter_intestini	96.84	253	9e-122
denovo1642	Singleton	1	1	0	0	0	0	0	JN194132.1.1320_Bacteria;Proteobacteria;Gammaproteobacteria;Enterobacteriales;Enterobacteriaceae;Pantoea;bacterium_MPB_JP_b	94.47	253	2e-107
denovo1643	Singleton	1	0	1	0	0	0	0	JN990099.1.1503_Bacteria;Proteobacteria;Gammaproteobacteria;Enterobacteriales;Enterobacteriaceae;Enterobacter;uncultured_bacterium	94.86	253	8e-110
denovo1647	Singleton	1	1	0	0	0	0	0	HQ787611.1.1463_Bacteria;Proteobacteria;Gammaproteobacteria;Enterobacteriales;Enterobacteriaceae;Enterobacter;uncultured_organism	95.26	253	3e-112
denovo1648	Singleton	1	0	1	0	0	0	0	JN175342.1.1527_Bacteria;Proteobacteria;Gammaproteobacteria;Enterobacteriales;Enterobacteriaceae;Tatumella;Tatumella_punctata	96.84	253	9e-122
denovo1649	Singleton	1	0	0	0	1	0	0	X80775.1.1448_Bacteria;Proteobacteria;Alphaproteobacteria;Rhodospirillales;Acetobacteraceae;Gluconobacter;Gluconobacter_cerinus	96.86	191	1e-89
denovo165	Singleton	1	0	0	0	0	1	0	JF690979.1.1419_Bacteria;Proteobacteria;Gammaproteobacteria;Enterobacteriales;Enterobacteriaceae;Enterobacter;Enterobacter_ludwigii	96.4	250	1e-117
denovo1651	Singleton	1	1	0	0	0	0	0	JN977206.1.1534_Bacteria;Proteobacteria;Deltaproteobacteria;Desulfobacterales;Desulfobulbaceae;uncultured;uncultured_bacterium	94.47	253	2e-107
denovo1652	Singleton	1	0	0	0	0	1	0	AB021400.1.1522_Bacteria;Proteobacteria;Gammaproteobacteria;Enterobacteriales;Enterobacteriaceae;Tatumella;Pseudomonas_flectens	97.63	253	2e-126
denovo1653	Singleton	1	1	0	0	0	0	0	FJ628232.1.1494_Bacteria;Proteobacteria;Epsilonproteobacteria;Campylobacterales;Helicobacteraceae;Sulfurimonas;uncultured_bacterium	92.89	253	7e-98
denovo1655	Singleton	1	0	1	0	0	0	0	FM165237.1.1502_Bacteria;Proteobacteria;Deltaproteobacteria;Myxococcales;Nannocystineae;uncultured;uncultured_bacterium	94.86	253	8e-110
denovo1656	Singleton	1	0	0	0	1	0	0	JN194132.1.1320_Bacteria;Proteobacteria;Gammaproteobacteria;Enterobacteriales;Enterobacteriaceae;Pantoea;bacterium_MPB_JP_b	90.91	253	6e-86
denovo1658	Singleton	1	0	1	0	0	0	0	JN175342.1.1527_Bacteria;Proteobacteria;Gammaproteobacteria;Enterobacteriales;Enterobacteriaceae;Tatumella;Tatumella_punctata	96.84	253	9e-122
denovo1659	Singleton	1	0	1	0	0	0	0	GQ417409.1.1465_Bacteria;Proteobacteria;Gammaproteobacteria;Enterobacteriales;Enterobacteriaceae;Citrobacter;uncultured_Citrobacter_sp.	95.26	253	3e-112
denovo166	Singleton	1	0	0	0	0	1	0	JN049601.1.1503_Bacteria;Proteobacteria;Gammaproteobacteria;Xanthomonadales;Xanthomonadaceae;Stenotrophomonas;Klebsiella_sp._Y6	96.05	253	5e-117
denovo1660	Singleton	1	0	1	0	0	0	0	JF706534.1.1396_Bacteria;Proteobacteria;Gammaproteobacteria;Enterobacteriales;Enterobacteriaceae;Erwinia;Erwinia_rhapontici	96.84	253	9e-122
denovo1661	Singleton	1	0	1	0	0	0	0	HQ153952.1.1420_Bacteria;Proteobacteria;Gammaproteobacteria;Thiotrichales;Thiotrichaceae;uncultured;uncultured_bacterium	95.26	253	3e-112
denovo1662	Singleton	1	0	0	0	0	1	0	JN175342.1.1527_Bacteria;Proteobacteria;Gammaproteobacteria;Enterobacteriales;Enterobacteriaceae;Tatumella;Tatumella_punctata	96.05	253	5e-117
denovo1663	Singleton	1	0	0	0	1	0	0	JN194132.1.1320_Bacteria;Proteobacteria;Gammaproteobacteria;Enterobacteriales;Enterobacteriaceae;Pantoea;bacterium_MPB_JP_b	95.65	253	1e-114
denovo1664	Singleton	1	0	0	0	0	1	0	JN175342.1.1527_Bacteria;Proteobacteria;Gammaproteobacteria;Enterobacteriales;Enterobacteriaceae;Tatumella;Tatumella_punctata	96.4	250	1e-117
denovo1665	Singleton	1	0	1	0	0	0	0	AY150184.1.1404_Bacteria;Proteobacteria;Gammaproteobacteria;Alteromonadales;Alteromonadaceae;Simiduia;symbiont_LP2_of_Lyrodus_pedicellatus	98.02	253	6e-129
denovo1666	Singleton	1	0	0	0	0	0	1	X82290.1.1476_Bacteria;Proteobacteria;Alphaproteobacteria;Rhodospirillales;Acetobacteraceae;Gluconobacter;Gluconobacter_frateurii	96.84	253	9e-122
denovo1669	Singleton	1	0	1	0	0	0	0	EU289465.1.1506_Bacteria;Proteobacteria;Gammaproteobacteria;Enterobacteriales;Enterobacteriaceae;Trabulsiella;uncultured_bacterium	96.05	253	5e-117
denovo167	Singleton	1	0	1	0	0	0	0	JN194132.1.1320_Bacteria;Proteobacteria;Gammaproteobacteria;Enterobacteriales;Enterobacteriaceae;Pantoea;bacterium_MPB_JP_b	97.63	253	2e-126
denovo1671	Singleton	1	0	1	0	0	0	0	FN429775.1.1516_Bacteria;Proteobacteria;Deltaproteobacteria;Desulfobacterales;Desulfobulbaceae;Desulfocapsa;uncultured_delta_proteobacterium	94.86	253	8e-110
denovo1672	Singleton	1	0	1	0	0	0	0	JN175342.1.1527_Bacteria;Proteobacteria;Gammaproteobacteria;Enterobacteriales;Enterobacteriaceae;Tatumella;Tatumella_punctata	95.26	253	3e-112
denovo1673	Singleton	1	0	1	0	0	0	0	JF920313.1.1360_Bacteria;Proteobacteria;Gammaproteobacteria;Enterobacteriales;Enterobacteriaceae;Raoultella;Enterobacter;uncultured_bacterium	95.26	253	3e-112
denovo1675	Singleton	1	0	1	0	0	0	0	JN175342.1.1527_Bacteria;Proteobacteria;Gammaproteobacteria;Enterobacteriales;Enterobacteriaceae;Tatumella;Tatumella_punctata	94.86	253	8e-110
denovo1676	Singleton	1	0	0	0	0	1	0	JN175342.1.1527_Bacteria;Proteobacteria;Gammaproteobacteria;Enterobacteriales;Enterobacteriaceae;Tatumella;Tatumella_punctata	95.65	253	1e-114
denovo1677	Singleton	1	0	1	0	0	0	0	HQ787611.1.1463_Bacteria;Proteobacteria;Gammaproteobacteria;Enterobacteriales;Enterobacteriaceae;Enterobacter;uncultured_organism	93.28	253	3e-100
denovo1678	Singleton	1	0	1	0	0	0	0	DQ269073.1.1411_Bacteria;Proteobacteria;Gammaproteobacteria;Alteromonadales;Alteromonadaceae;uncultured;uncultured_gamma_proteobacterium	93.28	253	3e-100
denovo1679	Singleton	1	0	0	0	0	0	1	HQ203810.1.1476_Bacteria;Proteobacteria;Epsilonproteobacteria;Campylobacterales;Helicobacteraceae;Sulfurimonas;uncultured_bacterium	90.4	250	9e-82
denovo168	Singleton	1	0	0	0	1	0	0	JF915349.1.1403_Bacteria;Proteobacteria;Gammaproteobacteria;Enterobacteriales;Enterobacteriaceae;Kluyvera;Buttiauxella_sp._NW51	92.89	253	7e-98
denovo1680	Singleton	1	0	1	0	0	0	0	AY230815.1.1460_Bacteria;Proteobacteria;Alphaproteobacteria;Rhodospirillales;Acetobacteraceae;Gluconacetobacter;Gluconacetobacter_diazotrophicus	96.3	243	2e-113
denovo1681	Singleton	1	0	1	0	0	0	0	JN175342.1.1527_Bacteria;Proteobacteria;Gammaproteobacteria;Enterobacteriales;Enterobacteriaceae;Tatumella;Tatumella_punctata	95.41	218	3e-96
denovo1682	Singleton	1	0	0	0	0	0	1	AB506690.1.1410_Bacteria;Proteobacteria;Gammaproteobacteria;Enterobacteriales;Enterobacteriaceae;Erwinia;Erwinia_sp._YPPS_950	96.05	253	5e-117
denovo1684	Singleton	1	0	0	1	0	0	0	EU574674.1.1439_Bacteria;Proteobacteria;Epsilonproteobacteria;Campylobacterales;Helicobacteraceae;Sulfurimonas;uncultured_bacterium	92.89	253	7e-98
denovo1685	Singleton	1	0	0	0	1	0	0	JN871229.1.1484_Bacteria;Proteobacteria;Gammaproteobacteria;Enterobacteriales;Enterobacteriaceae;Enterobacter;Enterobacter_cloacae_subsp._cloacae	93.28	253	3e-100
denovo1686	Singleton	1	0	1	0	0	0	0	JN613470.1.1451_Bacteria;Proteobacteria;Gammaproteobacteria;Enterobacteriales;Enterobacteriaceae;Enterobacter;Leclercia_sp._O-NR2	95.26	253	3e-100
denovo1687	Singleton	1	1	0	0	0	0	0	JN175342.1.1527_Bacteria;Proteobacteria;Gammaproteobacteria;Enterobacteriales;Enterobacteriaceae;Tatumella;Tatumella_punctata	93.28	253	3e-100
denovo1688	Singleton	1	0	0	0	0	0	1	JN175342.1.1527_Bacteria;Proteobacteria;Gammaproteobacteria;Enterobacteriales;Enterobacteriaceae;Tatumella;Tatumella_punctata	95.65	253	1e-114
denovo1689	Singleton	1	1	0	0	0	0	0	JN175342.1.1527_Bacteria;Proteobacteria;Gammaproteobacteria;Enterobacteriales;Enterobacteriaceae;Tatumella;Tatumella_punctata	96.8	250	6e-120
denovo169	Singleton	1	0	0	0	0	0	1	JN990099.1.1503_Bacteria;Proteobacteria;Gammaproteobacteria;Enterobacteriales;Enterobacteriaceae;Enterobacter;uncultured_bacterium	96.05	253	5e-117
denovo1691	Singleton	1	0	1	0	0	0	0	AB278144.1.1458_Bacteria;Proteobacteria;Gammaproteobacteria;Chromatiales;Granulosicoccaceae;Granulosicoccus;uncultured_bacterium	93.5	246	2e-98
denovo1692	Singleton	1	0	0	0	0	0	1	JN613470.1.1451_Bacteria;Proteobacteria;Gammaproteobacteria;Enterobacteriales;Enterobacteriaceae;Enterobacter;Leclercia_sp._O-NR2	91.3	253	2e-88
denovo1693	Singleton	1	0	1	0	0	0	0	JN175342.1.1527_Bacteria;Proteobacteria;Gammaproteobacteria;Enterobacteriales;Enterobacteriaceae;Tatumella;Tatumella_punctata	96.44	253	2e-119
denovo1694	Singleton	1	0	0	0	1	0	0	JN175342.1.1527_Bacteria;Proteobacteria;Gammaproteobacteria;Enterobacteriales;Enterobacteriaceae;Tatumella;Tatumella_punctata	94.47	253	2e-107
denovo1696	Singleton	1	0	0	0	1	0	0	JN175342.1.1527_Bacteria;Proteobacteria;Gammaproteobacteria;Enterobacteriales;Enterobacteriaceae;Tatumella;Tatumella_punctata	95.26	253	3e-112
denovo1697	Singleton	1	0	0	0	0	0	1	JN175342.1.1527_Bacteria;Proteobacteria;Gammaproteobacteria;Enterobacteriales;Enterobacteriaceae;Tatumella;Tatumella_punctata	96.44	253	2e-107
denovo1698	Singleton	1	0	0	0	1	0	0	X80775.1.1448_Bacteria;Proteobacteria;Alphaproteobacteria;Rhodospirillales;Acetobacteraceae;Gluconobacter;Gluconobacter_cerinus	96.44	253	2e-119
denovo1699	Singleton	1	0	1	0	0	0	0	AB286475.1.1456_Bacteria;Proteobacteria;Gammaproteobacteria;Aeromonadales;Aeromonadaceae;Aeromonas;uncultured_bacterium	95.65	253	1e-114
denovo170	Singleton	1	0	1	0	0	0	0	JN175342.1.1527_Bacteria;Proteobacteria;Gammaproteobacteria;Enterobacteriales;Enterobacteriaceae;Tatumella;Tatumella_punctata	94.47	253	2e-107
denovo1700	Singleton	1	0	1	0	0	0	0	EU287368.1.1501_Bacteria;Proteobacteria;Gammaproteobacteria;Oceanospirillales;Alcanivoracaceae;Kangiella;uncultured_bacterium	94.8	250	5e-108
denovo1701	Singleton	1	1	0	0	0	0	0	JN672630.1.1465_Bacteria;Proteobacteria;Gammaproteobacteria;BD7-8_marine_group;uncultured_gamma_proteobacterium	96	250	3e-115
denovo1702	Singleton	1	0	0	0	0	1	0	JN175342.1.1527_Bacteria;Proteobacteria;Gammaproteobacteria;Enterobacteriales;Enterobacteriaceae;Tatumella;Tatumella_punctata	95.51	245	7e-110
denovo1703	Singleton	1	0	0	0	1	0	0	HQ916543.1.1399_Bacteria;Proteobacteria;Gammaproteobacteria;Order_Incertae_Sedis;Family_Incertae_Sedis;Arenicella;uncultured_bacterium	90.91	253	6e-86
denovo1704	Singleton	1	0	0	0	0	1	0	JN175342.1.1527_Bacteria;Proteobacteria;Gammaproteobacteria;Enterobacteriales;Enterobacteriaceae;Tatumella;Tatumella_punctata	96.84	253	9e-122
denovo1705	Singleton	1	1	0	0	0	0	0	HM556852.1.1374_Bacteria;Proteobacteria;Gammaproteobacteria;Enterobacteriales;Enterobacteriaceae;Tatumella;uncultured_bacterium	97.63	253	2e-126
denovo1706	Singleton	1	1	0	0	0	0	0	JF767287.1.1485_Bacteria;Bacteroidetes;Flavobacteria;Flavobacteriales;Cryomorphaceae;Owenweeksia;uncultured_marine_bacterium	99.6	253	2e-138
denovo1707	Singleton	1	0	0	0	0	1	0	JN175342.1.1527_Bacteria;Proteobacteria;Gammaproteobacteria;Enterobacteriales;Enterobacteriaceae;Tatumella;Tatumella_punctata	97.21	251	6e-123
denovo1708	Singleton	1	0	0	0	0	1	0	JN990099.1.1503_Bacteria;Proteobacteria;Gammaproteobacteria;Enterobacteriales;Enterobacteriaceae;Enterobacter;uncultured_bacterium	92.49	253	2e-95
denovo1709	Singleton	1	0	0	0	1	0	0	HQ880415.1.1372_Bacteria;Proteobacteria;Gammaproteobacteria;Enterobacteriales;Enterobacteriaceae;Cronobacter;Cronobacter_dublinensis	96.84	253	9e-122
denovo171	Singleton	1	1	0	0	0	0	0	JF946790.1.1385_Bacteria;Proteobacteria;Gammaproteobacteria;Enterobacteriales;Enterobacteriaceae;Cedecea;Cedecea_sp._A415	94.86	253	8e-110
denovo1710	Singleton	1	0	0	0	0	1	0	HM557327.1.1357_Bacteria;Proteobacteria;Gammaproteobacteria;Enterobacteriales;Enterobacteriaceae;Enterobacter;uncultured_bacterium	94.69	245	4e-105
denovo1711	Singleton	1	0	0	0	0	1	0	HQ204289.1.1501_Bacteria;Proteobacteria;Gammaproteobacteria;Enterobacteriales;Enterobacteriaceae;Klebsiella;bacterium_QZ33S	96.84	253	9e-122
denovo1712	Singleton	1	0	0	0	0	1	0	JN175342.1.1527_Bacteria;Proteobacteria;Gammaproteobacteria;Enterobacteriales;Enterobacteriaceae;Tatumella;Tatumella_punctata	96.44	253	2e-119
denovo1713	Singleton	1	0	1	0	0	0	0	HM558240.1.1372_Bacteria;Proteobacteria;Gammaproteobacteria;Enterobacteriales;Enterobacteriaceae;Tatumella;uncultured_bacterium	96.44	253	2e-119
denovo1715	Singleton	1	0	1	0	0	0	0	JN175342.1.1527_Bacteria;Proteobacteria;Gammaproteobacteria;Enterobacteriales;Enterobacteriaceae;Tatumella;Tatumella_punctata	94.07	253	5e-105
denovo1716	Singleton	1	0	0	0	0	0	1	JN977396.1.1526_Bacteria;Proteobacteria;Gammaproteobacteria;Order_Incertae_Sedis;Family_Incertae_Sedis;Thiohalophilus;uncultured_bacterium	94.86	253	8e-110
denovo1718	Singleton	1	0	0	0	0	0	1	JN175342.1.1527_Bacteria;Proteobacteria;Gammaproteobacteria;Enterobacteriales;Enterobacteriaceae;Tatumella;Tatumella_punctata	96.05	253	5e-117
denovo1719	Singleton	1	0	0	0	0	0	1	JN175342.1.1527_Bacteria;Proteobacteria;Gammaproteobacteria;Enterobacteriales;Enterobacteriaceae;Tatumella;Tatumella_punctata	95.65	253	1e-114
denovo172	Singleton	1	0	1	0	0	0	0	JN194132.1.1320_Bacteria;Proteobacteria;Gammaproteobacteria;Enterobacteriales;Enterobacteriaceae;Pantoea;bacterium_MPB_JP_b	95.83	216	2e-97
denovo1720	Singleton	1	0	0	0	1	0	0	X82290.1.1476_Bacteria;Proteobacteria;Alphaproteobacteria;Rhodospirillales;Acetobacteraceae;Gluconobacter;Gluconobacter_frateurii	95.65	253	1e-114
denovo1721	Singleton	1	0	0	0	0	1	0	JN175342.1.1527_Bacteria;Proteobacteria;Gammaproteobacteria;Enterobacteriales;Enterobacteriaceae;Tatumella;Tatumella_punctata	96.8	250	6e-120
denovo1724	Singleton	1	0	1	0	0	0	0	JN175342.1.1527_Bacteria;Proteobacteria;Gammaproteobacteria;Enterobacteriales;Enterobacteriaceae;Tatumella;Tatumella_punctata	97.2	250	2e-122
denovo1725	Singleton	1	1	0	0	0	0	0	GU145547.1.1476_Bacteria;Proteobacteria;Epsilonproteobacteria;Campylobacterales;Helicobacteraceae;Sulfurimonas;uncultured_bacterium	97.23	253	4e-124
denovo1726	Singleton	1	0	0	1	0	0	0	JF344655.1.1521_Bacteria;Proteobacteria;Deltaproteobacteria;Desulfobacterales;Desulfobacteraceae;Sva0081_sediment_group;uncultured_delta_proteobacterium	96.73	245	5e-117
denovo1727	Singleton	1	1	0	0	0	0	0	X80775.1.1448_Bacteria;Proteobacteria;Alphaproteobacteria;Rhodospirillales;Acetobacteraceae;Gluconobacter;Gluconobacter_cerinus	94.86	253	8e-110
denovo1728	Singleton	1	0	0	0	0	0	1	HQ153883.1.1390_Bacteria;Proteobacteria;Gammaproteobacteria;Chromatiales;Granulosicoccaceae;Granulosicoccus;uncultured_bacterium	93.68	253	1e-102
denovo1729	Singleton	1	0	0	0	1	0	0	JN194132.1.1320_Bacteria;Proteobacteria;Gammaproteobacteria;Enterobacteriales;Enterobacteriaceae;Pantoea;bacterium_MPB_JP_b	96.44	253	2e-119
denovo173	Singleton	1	0	0	0	0	0	1	JN175342.1.1527_Bacteria;Proteobacteria;Gammaproteobacteria;Enterobacteriales;Enterobacteriaceae;Tatumella;Tatumella_punctata	96.44	253	2e-107
denovo1730	Singleton	1	0	0	0	0	1	0	AY690717.1.1482_Bacteria;Proteobacteria;Gammaproteobacteria;Enterobacteriales;Enterobacteriaceae;Brenneria;Erwinia_sp._MK09	92.49	253	2e-95
denovo1731	Singleton	1	0	0	0	0	0	1	JF920313.1.1360_Bacteria;Proteobacteria;Gammaproteobacteria;Enterobacteriales;Enterobacteriaceae;Raoultella;Enterobacter;uncultured_bacterium	94.07	253	5e-105
denovo1732	Singleton	1	0	1	0	0	0	0	JN175342.1.1527_Bacteria;Proteobacteria;Gammaproteobacteria;Enterobacteriales;Enterobacteriaceae;Tatumella;Tatumella_punctata	95.2	250	2e-110
denovo1733	Singleton	1	0	0	0	0	1	0	JN175342.1.1527_Bacteria;Proteobacteria;Gammaproteobacteria;Enterobacteriales;Enterobacteriaceae;Tatumella;Tatumella_punctata	94.86	253	8e-110
denovo1734	Singleton	1	0	1	0	0	0	0	GQ416356.1.1463_Bacteria;Proteobacteria;Gammaproteobacteria;Enterobacteriales;Enterobacteriaceae;Klebsiella;uncultured_Klebsiella_sp.	94.86	253	8e-110
denovo1735	Singleton	1	1	0	0	0	0	0	JN194132.1.1320_Bacteria;Proteobacteria;Gammaproteobacteria;Enterobacteriales;Enterobacteriaceae;Pantoea;bacterium_MPB_JP_b	96.44	253	2e-119
denovo1736	Singleton	1	0	0	0	0	0	1	GU583986.1.1508_Bacteria;Proteobacteria;Gammaproteobacteria;uncultured_bacterium	93.28	253	3e-100
denovo1738	Singleton	1	0	1	0	0	0	0	HQ191020.1.1395_Bacteria;Proteobacteria;Gammaproteobacteria;Xanthomonadales;Sinobacteraceae;JTB255_marine_benthic_group;uncultured_sediment_bacterium	95.65	253	1e-114
denovo174	Singleton	1	0	0	0	1	0	0	JN175342.1.1527_Bacteria;Proteobacteria;Gammaproteobacteria;Enterobacteriales;Enterobacteriaceae;Tatumella;Tatumella_punctata	96.05	253	5e-117
denovo1740	Singleton	1	0	0	0	1	0	0	JF690979.1.1419_Bacteria;Proteobacteria;Gammaproteobacteria;Enterobacteriales;Enterobacteriaceae;Enterobacter;Enterobacter_ludwigii	98.02	253	6e-129
denovo1741	Singleton	1	0	0	1	0	0	0	JN977155.1.1529_Bacteria;Proteobacteria;Gammaproteobacteria;Chromatiales;Granulosicoccaceae;Granulosicoccus;uncultured_bacterium	94.47	253	2e-107
denovo1742	Singleton	1	0	0	1	0	0	0	GU197429.1.1507_Bacteria;Proteobacteria;Deltaproteobacteria;Desulfobacterales;Desulfobulbaceae;uncultured;uncultured_bacterium	98.42	253	3e-131
denovo1744	Singleton	1	0	0	1	0	0	0	AB021400.1.1522_Bacteria;Proteobacteria;Gammaproteobacteria;Enterobacteriales;Enterobacteriaceae;Tatumella;Pseudomonas_flectens	94.47	253	2e-107
denovo1745	Singleton	1	0	0	0	0	0	1	HM556761.1.1322_Bacteria;Proteobacteria;Alphaproteobacteria;Rhodospirillales;Acetobacteraceae;Acetobacter;uncultured_bacterium	97.23	253	4e-124
denovo1747	Singleton	1	0	1	0	0	0	0	JN175342.1.1527_Bacteria;Proteobacteria;Gammaproteobacteria;Enterobacteriales;Enterobacteriaceae;Tatumella;Tatumella_punctata	94.86	253	8e-110
denovo1748	Singleton	1	0	0	0	0	0	1	Z93964.1.1527_Bacteria;Proteobacteria;Betaproteobacteria;Burkholderiales;Comamonadaceae;Acidovorax;uncultured_bacterium	99.07	214	7e-113
denovo1749	Singleton	1	0	0	0	0	0	1	HM109483.1.1384_Bacteria;Proteobacteria;Gammaproteobacteria;Enterobacteriales;Enterobacteriaceae;Tatumella;uncultured_gamma_proteobacterium	93.68	253	1e-102
denovo175	Singleton	1	1	0	0	0	0	0	JQ287026.1.1540_Bacteria;Proteobacteria;Deltaproteobacteria;Desulfobacterales;Desulfobulbaceae;SEEP-SRB4;uncultured_bacterium	95.65	253	1e-114
denovo1750	Singleton	1	0	0	0	0	1	0	JF706534.1.1396_Bacteria;Proteobacteria;Gammaproteobacteria;Enterobacteriales;Enterobacteriaceae;Erwinia;Erwinia_rhapontici	96.84	253	9e-122
denovo1752	Singleton	1	0	0	0	0	0	1	JF128989.1.1367_Bacteria;Proteobacteria;Gammaproteobacteria;Xanthomonadales;Xanthomonadaceae;Dyella;uncultured_bacterium	96.44	253	2e-119
denovo1753	Singleton	1	0	1	0	0	0	0	JN175342.1.1527_Bacteria;Proteobacteria;Gammaproteobacteria;Enterobacteriales;Enterobacteriaceae;Tatumella;Tatumella_punctata	96.05	253	5e-117
denovo1754	Singleton	1	0	1	0	0	0	0	JN175342.1.1527_Bacteria;Proteobacteria;Gammaproteobacteria;Enterobacteriales;Enterobacteriaceae;Tatumella;Tatumella_punctata	95.65	253	1e-114
denovo1756	Singleton	1	0	0	0	1	0	0	HM556457.1.1373_Bacteria;Proteobacteria;Gammaproteobacteria;Enterobacteriales;Enterobacteriaceae;Tatumella;uncultured_bacterium	95.65	253	1e-114
denovo1757	Singleton	1	0	1	0	0	0	0	HM556852.1.1374_Bacteria;Proteobacteria;Gammaproteobacteria;Enterobacteriales;Enterobacteriaceae;Tatumella;uncultured_bacterium	96.44	253	2e-119
denovo1758	Singleton	1	0	0	0	1	0	0	JN175342.1.1527_Bacteria;Proteobacteria;Gammaproteobacteria;Enterobacteriales;Enterobacteriaceae;Tatumella;Tatumella_punctata	96.44	253	2e-119
denovo1759	Singleton	1	0	1	0	0	0	0	JN175342.1.1527_Bacteria;Proteobacteria;Gammaproteobacteria;Enterobacteriales;Enterobacteriaceae;Tatumella;Tatumella_punctata	94.47	253	2e-107
denovo176	Singleton	1	1	0	0	0	0	0	JN175342.1.1527_Bacteria;Proteobacteria;Gammaproteobacteria;Enterobacteriales;Enterobacteriaceae;Tatumella;Tatumella_punctata	96.4	250	1e-117
denovo1760	Singleton	1	0	0	0	1	0	0	JN023771.1.1491_Bacteria;Proteobacteria;Gammaproteobacteria;Xanthomonadales;Sinobacteraceae;uncultured;uncultured_bacterium	100	253	7e-141
denovo1761	Singleton	1	0	0	0	0	0	1	JN175342.1.1527_Bacteria;Proteobacteria;Gammaproteobacteria;Enterobacteriales;Enterobacteriaceae;Tatumella;Tatumella_punctata	95.65	253	1e-114
denovo1762	Singleton	1	0	0	0	1	0	0	HQ673990.1.1462_Bacteria;Proteobacteria;Alphaproteobacteria;Rhodospirillales;Rhodospirillaceae;uncultured;uncultured_bacterium	92.89	253	7e-98
denovo1764	Singleton	1	0	0	0	1	0	0	JN175342.1.1527_Bacteria;Proteobacteria;Gammaproteobacteria;Enterobacteriales;Enterobacteriaceae;Tatumella;Tatumella_punctata	96.44	253	2e-119
denovo1765	Singleton	1	0	1	0	0	0	0	Z96089.1.1497_Bacteria;Proteobacteria;Gammaproteobacteria;Enterobacteriales;Enterobacteriaceae;Pectobacterium;Pectobacterium_carotovorum_subsp._carotovorum	95.65	253	1e-114
denovo1766	Singleton	1	1	0	0	0	0	0	DQ011254.1.1445_Bacteria;Proteobacteria;Gammaproteobacteria;Enterobacteriales;Enterobacteriaceae;Enterobacter;uncultured_bacterium	94.86	253	8e-110
denovo1768	Singleton	1	0	0	0	0	0	1	Z96078.1.1495_Bacteria;Proteobacteria;Gammaproteobacteria;Enterobacteriales;Enterobacteriaceae;Enterobacter;Enterobacter_cancerogenus	95.65	253	1e-102
denovo1769	Singleton	1	0	1	0	0	0	0	HM558240.1.1372_Bacteria;Proteobacteria;Gammaproteobacteria;Enterobacteriales;Enterobacteriaceae;Tatumella;uncultured_bacterium	96.84	253	9e-122
denovo1770	Singleton	1	1	0	0	0	0	0	JF703600.1.1510_Bacteria;Proteobacteria;Gammaproteobacteria;Enterobacteriales;Enterobacteriaceae;Enterobacter;uncultured_Enterobacter_sp.	94.86	253	8e-110
denovo1772	Singleton	1	0	1	0	0	0	0	HM556457.1.1373_Bacteria;Proteobacteria;Gammaproteobacteria;Enterobacteriales;Enterobacteriaceae;Tatumella;uncultured_bacterium	95.65	253	1e-114
denovo1774	Singleton	1	1	0	0	0	0	0	JF706534.1.1396_Bacteria;Proteobacteria;Gammaproteobacteria;Enterobacteriales;Enterobacteriaceae;Erwinia;Erwinia_rhapontici	94.47	253	2e-107
denovo1776	Singleton	1	0	0	0	0	1	0	JF706534.1.1396_Bacteria;Proteobacteria;Gammaproteobacteria;Enterobacteriales;Enterobacteriaceae;Erwinia;Erwinia_rhapontici	97.23	253	4e-124
denovo1777	Singleton	1	0	1	0	0	0	0	GU108571.1.1380_Bacteria;Proteobacteria;Gammaproteobacteria;Chromatiales;Chromatiaceae;Rheinheimera;uncultured_gamma_proteobacterium	90.51	253	1e-83
denovo1779	Singleton	1	1	0	0	0	0	0	AY216438.1.1365_Bacteria;Proteobacteria;Epsilonproteobacteria;Campylobacterales;Helicobacteraceae;Sulfurimonas;uncultured_bacterium	96.05	253	5e-117
denovo178	Singleton	1	0	1	0	0	0	0	FJ516918.1.1484_Bacteria;Bacteroidetes;SB-5;uncultured_Cytophagales_bacterium	97.63	253	2e-126
denovo1780	Singleton	1	1	0	0	0	0	0	JN175342.1.1527_Bacteria;Proteobacteria;Gammaproteobacteria;Enterobacteriales;Enterobacteriaceae;Tatumella;Tatumella_punctata	94.86	253	8e-110
denovo1781	Singleton	1	0	1	0	0	0	0	JN175342.1.1527_Bacteria;Proteobacteria;Gammaproteobacteria;Enterobacteriales;Enterobacteriaceae;Tatumella;Tatumella_punctata	96.05	253	7e-107
denovo1783	Singleton	1	1	0	0	0	0	0	DQ009125.1.1942_Bacteria;Proteobacteria;Gammaproteobacteria;Oceanospirillales;SAR86_clade;uncultured_marine_bacterium	99.18	243	4e-130
denovo1784	Singleton	1	0	0	0	0	1	0	JN175342.1.1527_Bacteria;Proteobacteria;Gammaproteobacteria;Enterobacteriales;Enterobacteriaceae;Tatumella;Tatumella_punctata	96.35	219	1e-101
denovo1785	Singleton	1	0	1	0	0	0	0	GQ452899.1.1497_Bacteria;Proteobacteria;Gammaproteobacteria;Alteromonadales;Alteromonadaceae;OM60(NOR5)_clade;uncultured_gamma_proteobacterium	95.26	253	3e-112
denovo1786	Singleton	1	0	1	0	0	0	0	JN175342.1.1527_Bacteria;Proteobacteria;Gammaproteobacteria;Enterobacteriales;Enterobacteriaceae;Tatumella;Tatumella_punctata	96.84	253	9e-122
denovo1787	Singleton	1	0	0	0	0	0	1	JN175342.1.1527_Bacteria;Proteobacteria;Gammaproteobacteria;Enterobacteriales;Enterobacteriaceae;Tatumella;Tatumella_punctata	96.05	253	5e-117
denovo1788	Singleton	1	0	0	0	0	0	1	X82290.1.1476_Bacteria;Proteobacteria;Alphaproteobacteria;Rhodospirillales;Acetobacteraceae;Gluconobacter;Gluconobacter_frateurii	98.02	253	6e-129
denovo1789	Singleton	1	0	1	0	0	0	0	FJ202843.1.1506_Bacteria;Proteobacteria;Deltaproteobacteria;Desulfobacterales;Desulfobacteraceae;Desulforegula;uncultured_bacterium	91.7	253	1e-90
denovo179	Singleton	1	0	0	0	0	0	1	HM556852.1.1374_Bacteria;Proteobacteria;Gammaproteobacteria;Enterobacteriales;Enterobacteriaceae;Tatumella;uncultured_bacterium	92.49	253	2e-95
denovo1790	Singleton	1	0	0	0	0	0	1	EF604413.1.1489_Bacteria;Proteobacteria;Gammaproteobacteria;Enterobacteriales;Enterobacteriaceae;Salmonella;uncultured_bacterium	96.44	253	2e-119
denovo1791	Singleton	1	0	1	0	0	0	0	JF915349.1.1403_Bacteria;Proteobacteria;Gammaproteobacteria;Enterobacteriales;Enterobacteriaceae;Kluyvera;Buttiauxella_sp._NW51	94.86	253	8e-110
denovo1792	Singleton	1	0	1	0	0	0	0	HM556852.1.1374_Bacteria;Proteobacteria;Gammaproteobacteria;Enterobacteriales;Enterobacteriaceae;Tatumella;uncultured_bacterium	94.07	253	5e-105
denovo1794	Singleton	1	0	1	0	0	0	0	JF915349.1.1403_Bacteria;Proteobacteria;Gammaproteobacteria;Enterobacteriales;Enterobacteriaceae;Kluyvera;Buttiauxella_sp._NW51	96.84	253	9e-122
denovo1795	Singleton	1	1	0	0	0	0	0	JN175342.1.1527_Bacteria;Proteobacteria;Gammaproteobacteria;Enterobacteriales;Enterobacteriaceae;Tatumella;Tatumella_punctata	96.84	253	9e-122
denovo1796	Singleton	1	0	1	0	0	0	0	AY542553.1.1365_Bacteria;Proteobacteria;Gammaproteobacteria;Thiotrichales;Thiotrichaceae;uncultured;uncultured_gamma_proteobacterium	97.23	253	4e-124
denovo1797	Singleton	1	0	0	0	0	0	1	JF690979.1.1419_Bacteria;Proteobacteria;Gammaproteobacteria;Enterobacteriales;Enterobacteriaceae;Enterobacter;Enterobacter_ludwigii	96.44	253	2e-119
denovo1798	Singleton	1	0	1	0	0	0	0	U78182.1.1502_Bacteria;Proteobacteria;Gammaproteobacteria;Enterobacteriales;Enterobacteriaceae;Raoultella;Raoultella_ornithinolytica	97.63	253	2e-126
denovo1799	Singleton	1	1	0	0	0	0	0	JN194132.1.1320_Bacteria;Proteobacteria;Gammaproteobacteria;Enterobacteriales;Enterobacteriaceae;Pantoea;bacterium_MPB_JP_b	92.49	253	2e-95
denovo18	Singleton	1	1	0	0	0	0	0	EF509905.1.1477_Bacteria;Proteobacteria;Gammaproteobacteria;Enterobacteriales;Enterobacteriaceae;Klebsiella;uncultured_bacterium	96.84	253	9e-122
denovo180	Singleton	1	0	0	0	0	1	0	JN175342.1.1527_Bacteria;Proteobacteria;Gammaproteobacteria;Enterobacteriales;Enterobacteriaceae;Tatumella;Tatumella_punctata	95.65	253	1e-114
denovo1801	Singleton	1	0	1	0	0	0	0	JN175342.1.1527_Bacteria;Proteobacteria;Gammaproteobacteria;Enterobacteriales;Enterobacteriaceae;Tatumella;Tatumella_punctata	92.49	253	2e-95
denovo1802	Singleton	1	0	1	0	0	0	0	HM556852.1.1374_Bacteria;Proteobacteria;Gammaproteobacteria;Enterobacteriales;Enterobacteriaceae;Tatumella;uncultured_bacterium	95.26	253	3e-112
denovo1803	Singleton	1	0	0	0	1	0	0	X80775.1.1448_Bacteria;Proteobacteria;Alphaproteobacteria;Rhodospirillales;Acetobacteraceae;Gluconobacter;Gluconobacter_cerinus	96.44	253	2e-119
denovo1805	Singleton	1	0	0	0	0	1	0	JN194132.1.1320_Bacteria;Proteobacteria;Gammaproteobacteria;Enterobacteriales;Enterobacteriaceae;Pantoea;bacterium_MPB_JP_b	96.05	253	5e-117
denovo1807	Singleton	1	0	0	0	1	0	0	HM556852.1.1374_Bacteria;Proteobacteria;Gammaproteobacteria;Enterobacteriales;Enterobacteriaceae;Tatumella;uncultured_bacterium	95.26	253	3e-112
denovo1808	Singleton	1	1	0	0	0	0	0	JN175342.1.1527_Bacteria;Proteobacteria;Gammaproteobacteria;Enterobacteriales;Enterobacteriaceae;Tatumella;Tatumella_punctata	94.07	253	5e-105
denovo1809	Singleton	1	1	0	0	0	0	0	JN175342.1.1527_Bacteria;Proteobacteria;Gammaproteobacteria;Enterobacteriales;Enterobacteriaceae;Tatumella;Tatumella_punctata	96.84	253	8e-110
denovo181	Singleton	1	0	1	0	0	0	0	JN175342.1.1527_Bacteria;Proteobacteria;Gammaproteobacteria;Enterobacteriales;Enterobacteriaceae;Tatumella;Tatumella_punctata	96.84	253	9e-122
denovo1810	Singleton	1	0	0	0	1	0	0	JN175342.1.1527_Bacteria;Proteobacteria;Gammaproteobacteria;Enterobacteriales;Enterobacteriaceae;Tatumella;Tatumella_punctata	97.2	250	2e-122
denovo1811	Singleton	1	0	0	0	1	0	0	X80775.1.1448_Bacteria;Proteobacteria;Alphaproteobacteria;Rhodospirillales;Acetobacteraceae;Gluconobacter;Gluconobacter_cerinus	95.65	253	1e-114
denovo1812	Singleton	1	0	1	0	0	0	0	HM556852.1.1374_Bacteria;Proteobacteria;Gammaproteobacteria;Enterobacteriales;Enterobacteriaceae;Tatumella;uncultured_bacterium	95.26	253	3e-112
denovo1813	Singleton	1	0	0	0	1	0	0	AM882524.1.1493_Bacteria;Proteobacteria;Gammaproteobacteria;Chromatiales;Ectothiorhodospiraceae;Acidiferrobacter;uncultured_gamma_proteobacterium	96.05	253	5e-117
denovo1814	Singleton	1	0	1	0	0	0	0	JN874148.1.1475_Bacteria;Proteobacteria;Epsilonproteobacteria;Campylobacterales;Helicobacteraceae;Sulfurimonas;uncultured_bacterium	90	250	2e-79
denovo1815	Singleton	1	0	0	0	1	0	0	AJ244799.1.1333_Bacteria;Actinobacteria;Actinobacteria;Propionibacteriales;Propionibacteriaceae;Jiangella;Gram-positive_bacterium_SOGA22	96.84	253	9e-122
denovo1816	Singleton	1	0	0	0	0	1	0	EU491786.1.1456_Bacteria;Proteobacteria;Gammaproteobacteria;Alteromonadales;Alteromonadaceae;OM60(NOR5)_clade;uncultured_bacterium	96.05	253	5e-117
denovo1817	Singleton	1	0	0	0	0	0	1	X82290.1.1476_Bacteria;Proteobacteria;Alphaproteobacteria;Rhodospirillales;Acetobacteraceae;Gluconobacter;Gluconobacter_frateurii	98.02	253	6e-129
denovo1818	Singleton	1	0	1	0	0	0	0	JN175342.1.1527_Bacteria;Proteobacteria;Gammaproteobacteria;Enterobacteriales;Enterobacteriaceae;Tatumella;Tatumella_punctata	96.44	253	2e-119
denovo182	Singleton	1	0	0	0	1	0	0	JN175342.1.1527_Bacteria;Proteobacteria;Gammaproteobacteria;Enterobacteriales;Enterobacteriaceae;Tatumella;Tatumella_punctata	96.05	253	5e-117
denovo1820	Singleton	1	1	0	0	0	0	0	JN175342.1.1527_Bacteria;Proteobacteria;Gammaproteobacteria;Enterobacteriales;Enterobacteriaceae;Tatumella;Tatumella_punctata	95.65	253	1e-114
denovo1821	Singleton	1	0	1	0	0	0	0	JF706534.1.1396_Bacteria;Proteobacteria;Gammaproteobacteria;Enterobacteriales;Enterobacteriaceae;Erwinia;Erwinia_rhapontici	92.89	253	7e-98
denovo1822	Singleton	1	0	0	0	1	0	0	GQ416352.1.1463_Bacteria;Proteobacteria;Gammaproteobacteria;Enterobacteriales;Enterobacteriaceae;Klebsiella;uncultured_Klebsiella_sp.	93.28	253	3e-100
denovo1823	Singleton	1	0	0	0	0	0	1	JN175342.1.1527_Bacteria;Proteobacteria;Gammaproteobacteria;Enterobacteriales;Enterobacteriaceae;Tatumella;Tatumella_punctata	95.6	250	8e-113
denovo1824	Singleton	1	0	1	0	0	0	0	HQ191058.1.1498_Bacteria;Proteobacteria;Gammaproteobacteria;BD7-8_marine_group;uncultured_sediment_bacterium	96.05	253	5e-117
denovo1825	Singleton	1	0	1	0	0	0	0	JN990099.1.1503_Bacteria;Proteobacteria;Gammaproteobacteria;Enterobacteriales;Enterobacteriaceae;Enterobacter;uncultured_bacterium	95.26	253	3e-112
denovo1826	Singleton	1	0	0	0	1	0	0	JN175342.1.1527_Bacteria;Proteobacteria;Gammaproteobacteria;Enterobacteriales;Enterobacteriaceae;Tatumella;Tatumella_punctata	94.8	250	5e-108
denovo1827	Singleton	1	0	1	0	0	0	0	FJ868805.1.1515_Bacteria;Proteobacteria;Gammaproteobacteria;Enterobacteriales;Enterobacteriaceae;Enterobacter;Enterobacter_sp._BSRA1	94.07	253	5e-105
denovo1828	Singleton	1	0	1	0	0	0	0	JN175342.1.1527_Bacteria;Proteobacteria;Gammaproteobacteria;Enterobacteriales;Enterobacteriaceae;Tatumella;Tatumella_punctata	95.26	253	3e-112
denovo1829	Singleton	1	0	1	0	0	0	0	HQ916532.1.1405_Bacteria;Proteobacteria;Gammaproteobacteria;Order_Incertae_Sedis;Family_Incertae_Sedis;Thiohalophilus;uncultured_bacterium	94.47	253	2e-107
denovo183	Singleton	1	0	1	0	0	0	0	JN175342.1.1527_Bacteria;Proteobacteria;Gammaproteobacteria;Enterobacteriales;Enterobacteriaceae;Tatumella;Tatumella_punctata	95.41	218	3e-96
denovo1830	Singleton	1	1	0	0	0	0	0	HM558240.1.1372_Bacteria;Proteobacteria;Gammaproteobacteria;Enterobacteriales;Enterobacteriaceae;Tatumella;uncultured_bacterium	96.84	253	9e-122
denovo1831	Singleton	1	1	0	0	0	0	0	JN175342.1.1527_Bacteria;Proteobacteria;Gammaproteobacteria;Enterobacteriales;Enterobacteriaceae;Tatumella;Tatumella_punctata	96.4	250	1e-117
denovo1832	Singleton	1	0	0	0	0	0	1	HM558240.1.1372_Bacteria;Proteobacteria;Gammaproteobacteria;Enterobacteriales;Enterobacteriaceae;Tatumella;uncultured_bacterium	97.23	253	4e-124
denovo1833	Singleton	1	0	0	0	0	0	1	JN175342.1.1527_Bacteria;Proteobacteria;Gammaproteobacteria;Enterobacteriales;Enterobacteriaceae;Tatumella;Tatumella_punctata	96.05	253	5e-117
denovo1834	Singleton	1	0	0	0	1	0	0	JN793873.1.1507_Bacteria;Proteobacteria;Gammaproteobacteria;Enterobacteriales;Enterobacteriaceae;Tatumella;uncultured_Enterobacteriaceae_bacterium	96.05	253	5e-117
denovo1835	Singleton	1	0	1	0	0	0	0	GQ417303.1.1463_Bacteria;Proteobacteria;Gammaproteobacteria;Enterobacteriales;Enterobacteriaceae;Klebsiella;uncultured_Klebsiella_sp.	94.86	253	8e-110
denovo1836	Singleton	1	0	1	0	0	0	0	JN175342.1.1527_Bacteria;Proteobacteria;Gammaproteobacteria;Enterobacteriales;Enterobacteriaceae;Tatumella;Tatumella_punctata	95.65	253	1e-114
denovo1837	Singleton	1	0	1	0	0	0	0	JN990099.1.1503_Bacteria;Proteobacteria;Gammaproteobacteria;Enterobacteriales;Enterobacteriaceae;Enterobacter;uncultured_bacterium	94.86	253	8e-110
denovo1839	Singleton	1	0	1	0	0	0	0	JN175342.1.1527_Bacteria;Proteobacteria;Gammaproteobacteria;Enterobacteriales;Enterobacteriaceae;Tatumella;Tatumella_punctata	96.84	253	9e-122
denovo184	Singleton	1	0	0	0	0	1	0	JN175342.1.1527_Bacteria;Proteobacteria;Gammaproteobacteria;Enterobacteriales;Enterobacteriaceae;Tatumella;Tatumella_punctata	94.07	253	5e-105
denovo1840	Singleton	1	0	1	0	0	0	0	JF706534.1.1396_Bacteria;Proteobacteria;Gammaproteobacteria;Enterobacteriales;Enterobacteriaceae;Erwinia;Erwinia_rhapontici	96.44	253	2e-119
denovo1841	Singleton	1	0	0	0	1	0	0	FJ264662.1.1511_Bacteria;Proteobacteria;Gammaproteobacteria;Alteromonadales;Alteromonadaceae;Haliea;uncultured_bacterium	96.05	253	5e-117
denovo1842	Singleton	1	0	0	0	1	0	0	JF706534.1.1396_Bacteria;Proteobacteria;Gammaproteobacteria;Enterobacteriales;Enterobacteriaceae;Erwinia;Erwinia_rhapontici	96.05	253	5e-117
denovo1844	Singleton	1	1	0	0	0	0	0	JF344268.1.1520_Bacteria;Proteobacteria;Deltaproteobacteria;Desulfobacterales;Desulfobacteraceae;Desulfobacula;uncultured_delta_proteobacterium	96.05	253	5e-117
denovo1845	Singleton	1	1	0	0	0	0	0	HM558240.1.1372_Bacteria;Proteobacteria;Gammaproteobacteria;Enterobacteriales;Enterobacteriaceae;Tatumella;uncultured_bacterium	94.07	253	5e-105
denovo1846	Singleton	1	0	0	0	0	1	0	Z96078.1.1495_Bacteria;Proteobacteria;Gammaproteobacteria;Enterobacteriales;Enterobacteriaceae;Enterobacter;Enterobacter_cancerogenus	95.85	217	5e-86
denovo1847	Singleton	1	0	0	0	0	1	0	JN175342.1.1527_Bacteria;Proteobacteria;Gammaproteobacteria;Enterobacteriales;Enterobacteriaceae;Tatumella;Tatumella_punctata	96.84	253	9e-122
denovo1848	Singleton	1	1	0	0	0	0	0	JF833747.1.1497_Bacteria;Proteobacteria;Gammaproteobacteria;Enterobacteriales;Enterobacteriaceae;Enterobacter;uncultured_Streptomyces_sp.	94.86	253	8e-110
denovo1849	Singleton	1	1	0	0	0	0	0	HM556852.1.1374_Bacteria;Proteobacteria;Gammaproteobacteria;Enterobacteriales;Enterobacteriaceae;Tatumella;uncultured_bacterium	96.84	253	9e-122
denovo185	Singleton	1	1	0	0	0	0	0	JN175342.1.1527_Bacteria;Proteobacteria;Gammaproteobacteria;Enterobacteriales;Enterobacteriaceae;Tatumella;Tatumella_punctata	96.44	253	2e-119
denovo1850	Singleton	1	0	0	0	1	0	0	X80775.1.1448_Bacteria;Proteobacteria;Alphaproteobacteria;Rhodospirillales;Acetobacteraceae;Gluconobacter;Gluconobacter_cerinus	96.05	253	5e-117
denovo1851	Singleton	1	0	0	0	0	1	0	JN990082.1.1502_Bacteria;Proteobacteria;Gammaproteobacteria;Enterobacteriales;Enterobacteriaceae;Enterobacter;uncultured_gamma_proteobacterium	96.05	253	5e-117
denovo1852	Singleton	1	0	0	0	0	1	0	JN175342.1.1527_Bacteria;Proteobacteria;Gammaproteobacteria;Enterobacteriales;Enterobacteriaceae;Tatumella;Tatumella_punctata	92.17	217	7e-79
denovo1855	Singleton	1	0	0	0	1	0	0	JN175342.1.1527_Bacteria;Proteobacteria;Gammaproteobacteria;Enterobacteriales;Enterobacteriaceae;Tatumella;Tatumella_punctata	96.05	253	5e-117
denovo1856	Singleton	1	0	1	0	0	0	0	JF344532.1.1499_Bacteria;Proteobacteria;Gammaproteobacteria;uncultured_gamma_proteobacterium	96.84	253	9e-122
denovo1857	Singleton	1	0	1	0	0	0	0	JN175342.1.1527_Bacteria;Proteobacteria;Gammaproteobacteria;Enterobacteriales;Enterobacteriaceae;Tatumella;Tatumella_punctata	96.33	218	6e-101
denovo1858	Singleton	1	0	1	0	0	0	0	JN175342.1.1527_Bacteria;Proteobacteria;Gammaproteobacteria;Enterobacteriales;Enterobacteriaceae;Tatumella;Tatumella_punctata	96.44	253	2e-119
denovo1859	Singleton	1	0	0	0	1	0	0	X80775.1.1448_Bacteria;Proteobacteria;Alphaproteobacteria;Rhodospirillales;Acetobacteraceae;Gluconobacter;Gluconobacter_cerinus	96.44	253	2e-119
denovo186	Singleton	1	0	1	0	0	0	0	Z14111.1.1438_Bacteria;Actinobacteria;Actinobacteria;Pseudonocardiales;Pseudonocardiaceae;Pseudonocardia;Pseudonocardia_halophobica	100	254	2e-141
denovo1860	Singleton	1	0	1	0	0	0	0	JN175342.1.1527_Bacteria;Proteobacteria;Gammaproteobacteria;Enterobacteriales;Enterobacteriaceae;Tatumella;Tatumella_punctata	96.44	253	2e-119
denovo1861	Singleton	1	0	0	0	1	0	0	JN990099.1.1503_Bacteria;Proteobacteria;Gammaproteobacteria;Enterobacteriales;Enterobacteriaceae;Enterobacter;uncultured_bacterium	96.05	253	5e-117
denovo1862	Singleton	1	0	0	0	0	0	1	X73820.1.1476_Bacteria;Proteobacteria;Alphaproteobacteria;Rhodospirillales;Acetobacteraceae;Gluconobacter;Gluconobacter_oxydans	94.49	254	3e-103
denovo1863	Singleton	1	0	1	0	0	0	0	DQ011254.1.1445_Bacteria;Proteobacteria;Gammaproteobacteria;Enterobacteriales;Enterobacteriaceae;Enterobacter;uncultured_bacterium	93.68	253	1e-102
denovo1864	Singleton	1	1	0	0	0	0	0	GQ348617.1.1364_Bacteria;Proteobacteria;Deltaproteobacteria;Desulfobacterales;Nitrospinaceae;Nitrospina;uncultured_delta_proteobacterium	96.28	242	8e-113
denovo1865	Singleton	1	0	1	0	0	0	0	EU289465.1.1506_Bacteria;Proteobacteria;Gammaproteobacteria;Enterobacteriales;Enterobacteriaceae;Trabulsiella;uncultured_bacterium	95.65	253	1e-114
denovo1866	Singleton	1	0	1	0	0	0	0	JN194132.1.1320_Bacteria;Proteobacteria;Gammaproteobacteria;Enterobacteriales;Enterobacteriaceae;Pantoea;bacterium_MPB_JP_b	95.26	253	3e-112
denovo1867	Singleton	1	0	1	0	0	0	0	EF059832.1.1462_Bacteria;Proteobacteria;Gammaproteobacteria;Enterobacteriales;Enterobacteriaceae;Enterobacter;bacterium_E429	96.05	253	5e-117
denovo1868	Singleton	1	1	0	0	0	0	0	JN175342.1.1527_Bacteria;Proteobacteria;Gammaproteobacteria;Enterobacteriales;Enterobacteriaceae;Tatumella;Tatumella_punctata	96.44	253	2e-119
denovo1869	Singleton	1	0	0	0	1	0	0	JN175342.1.1527_Bacteria;Proteobacteria;Gammaproteobacteria;Enterobacteriales;Enterobacteriaceae;Tatumella;Tatumella_punctata	96.84	253	9e-122
denovo187	Singleton	1	0	0	0	1	0	0	X80775.1.1448_Bacteria;Proteobacteria;Alphaproteobacteria;Rhodospirillales;Acetobacteraceae;Gluconobacter;Gluconobacter_cerinus	95.65	253	1e-114
denovo1870	Singleton	1	0	0	0	1	0	0	X80775.1.1448_Bacteria;Proteobacteria;Alphaproteobacteria;Rhodospirillales;Acetobacteraceae;Gluconobacter;Gluconobacter_cerinus	93.28	253	3e-100
denovo1871	Singleton	1	0	1	0	0	0	0	JN175342.1.1527_Bacteria;Proteobacteria;Gammaproteobacteria;Enterobacteriales;Enterobacteriaceae;Tatumella;Tatumella_punctata	96.84	253	9e-122
denovo1872	Singleton	1	0	0	0	0	1	0	JQ396393.1.1405_Bacteria;Proteobacteria;Gammaproteobacteria;Enterobacteriales;Enterobacteriaceae;Serratia_sp._PXG6	95.26	253	3e-112
denovo1873	Singleton	1	0	0	0	0	0	1	JN990099.1.1503_Bacteria;Proteobacteria;Gammaproteobacteria;Enterobacteriales;Enterobacteriaceae;Enterobacter;uncultured_bacterium	94.07	253	5e-105
denovo1874	Singleton	1	0	0	0	1	0	0	X80775.1.1448_Bacteria;Proteobacteria;Alphaproteobacteria;Rhodospirillales;Acetobacteraceae;Gluconobacter;Gluconobacter_cerinus	96.44	253	2e-119
denovo1875	Singleton	1	0	1	0	0	0	0	HQ673550.1.1502_Bacteria;Proteobacteria;Gammaproteobacteria;Alteromonadales;Alteromonadaceae;uncultured;uncultured_bacterium	98.02	253	6e-129
denovo1876	Singleton	1	0	1	0	0	0	0	HQ671894.1.1428_Bacteria;Proteobacteria;Alphaproteobacteria;Rhodobacterales;Rhodobacteraceae;Roseobacter_clade_OCT_lineage;uncultured_bacterium	94.47	253	2e-107
denovo1877	Singleton	1	0	0	0	0	1	0	JN175342.1.1527_Bacteria;Proteobacteria;Gammaproteobacteria;Enterobacteriales;Enterobacteriaceae;Tatumella;Tatumella_punctata	96.3	216	9e-100
denovo1878	Singleton	1	0	1	0	0	0	0	JN175342.1.1527_Bacteria;Proteobacteria;Gammaproteobacteria;Enterobacteriales;Enterobacteriaceae;Tatumella;Tatumella_punctata	95.65	253	1e-114
denovo1879	Singleton	1	0	1	0	0	0	0	JF706534.1.1396_Bacteria;Proteobacteria;Gammaproteobacteria;Enterobacteriales;Enterobacteriaceae;Erwinia;Erwinia_rhapontici	94.07	253	5e-105
denovo188	Singleton	1	0	0	0	0	1	0	JN049601.1.1503_Bacteria;Proteobacteria;Gammaproteobacteria;Xanthomonadales;Xanthomonadaceae;Stenotrophomonas;Klebsiella_sp._Y6	96.44	253	2e-119
denovo1880	Singleton	1	1	0	0	0	0	0	JN175342.1.1527_Bacteria;Proteobacteria;Gammaproteobacteria;Enterobacteriales;Enterobacteriaceae;Tatumella;Tatumella_punctata	95.65	253	1e-114
denovo1881	Singleton	1	0	1	0	0	0	0	HM590891.1.1503_Bacteria;Proteobacteria;Gammaproteobacteria;Enterobacteriales;Enterobacteriaceae;Serratia;Serratia_marcescens	93.68	253	1e-102
denovo1882	Singleton	1	0	0	0	0	1	0	GQ246422.1.1519_Bacteria;Candidate_division_WS3;uncultured_bacterium	97.94	243	6e-123
denovo1884	Singleton	1	0	0	1	0	0	0	EU741091.1.1407_Bacteria;Proteobacteria;Alphaproteobacteria;Rhodobacterales;Rhodobacteraceae;Rhodobacter;Rhodobacter_sp._13636H	92.49	253	2e-95
denovo1885	Singleton	1	0	1	0	0	0	0	JF915349.1.1403_Bacteria;Proteobacteria;Gammaproteobacteria;Enterobacteriales;Enterobacteriaceae;Kluyvera;Buttiauxella_sp._NW51	95.65	253	1e-114
denovo1886	Singleton	1	1	0	0	0	0	0	HM556852.1.1374_Bacteria;Proteobacteria;Gammaproteobacteria;Enterobacteriales;Enterobacteriaceae;Tatumella;uncultured_bacterium	94.86	253	8e-110
denovo1887	Singleton	1	0	0	0	0	1	0	HM556852.1.1374_Bacteria;Proteobacteria;Gammaproteobacteria;Enterobacteriales;Enterobacteriaceae;Tatumella;uncultured_bacterium	96.79	218	2e-103
denovo1888	Singleton	1	0	1	0	0	0	0	JN175342.1.1527_Bacteria;Proteobacteria;Gammaproteobacteria;Enterobacteriales;Enterobacteriaceae;Tatumella;Tatumella_punctata	96.84	253	9e-122
denovo1889	Singleton	1	0	1	0	0	0	0	JN175342.1.1527_Bacteria;Proteobacteria;Gammaproteobacteria;Enterobacteriales;Enterobacteriaceae;Tatumella;Tatumella_punctata	95.65	253	1e-114
denovo189	Singleton	1	0	1	0	0	0	0	JN175342.1.1527_Bacteria;Proteobacteria;Gammaproteobacteria;Enterobacteriales;Enterobacteriaceae;Tatumella;Tatumella_punctata	94.07	253	5e-105
denovo1891	Singleton	1	0	0	1	0	0	0	U77478.1.1461_Bacteria;Proteobacteria;Gammaproteobacteria;Order_Incertae_Sedis;Family_Incertae_Sedis;Sedimenticola;endosymbiont_of_Riftia_pachyptila	92.09	253	4e-93
denovo1893	Singleton	1	1	0	0	0	0	0	JN175342.1.1527_Bacteria;Proteobacteria;Gammaproteobacteria;Enterobacteriales;Enterobacteriaceae;Tatumella;Tatumella_punctata	95.65	253	1e-114
denovo1894	Singleton	1	0	0	0	1	0	0	JF706534.1.1396_Bacteria;Proteobacteria;Gammaproteobacteria;Enterobacteriales;Enterobacteriaceae;Erwinia;Erwinia_rhapontici	94.47	253	2e-107
denovo1896	Singleton	1	0	1	0	0	0	0	FN677979.1.1427_Bacteria;Proteobacteria;Gammaproteobacteria;Chromatiales;Chromatiaceae;Thiophaeococcus_sp._JA592	92.49	253	2e-95
denovo1897	Singleton	1	0	1	0	0	0	0	FJ535299.1.1362_Bacteria;Proteobacteria;Gammaproteobacteria;BD7-8_marine_group;uncultured_bacterium	96.44	253	2e-119
denovo1898	Singleton	1	0	1	0	0	0	0	JF747656.1.1535_Bacteria;Proteobacteria;Deltaproteobacteria;Syntrophobacterales;Syntrophobacteraceae;uncultured;uncultured_bacterium	97.63	253	2e-126
denovo190	Singleton	1	1	0	0	0	0	0	JN175342.1.1527_Bacteria;Proteobacteria;Gammaproteobacteria;Enterobacteriales;Enterobacteriaceae;Tatumella;Tatumella_punctata	96.4	250	1e-117
denovo1900	Singleton	1	0	1	0	0	0	0	JN049601.1.1503_Bacteria;Proteobacteria;Gammaproteobacteria;Xanthomonadales;Xanthomonadaceae;Stenotrophomonas;Klebsiella_sp._Y6	97.63	253	2e-126
denovo1901	Singleton	1	0	1	0	0	0	0	JF706534.1.1396_Bacteria;Proteobacteria;Gammaproteobacteria;Enterobacteriales;Enterobacteriaceae;Erwinia;Erwinia_rhapontici	96.05	253	5e-117
denovo1902	Singleton	1	0	1	0	0	0	0	HE589869.1.1460_Bacteria;Proteobacteria;Gammaproteobacteria;Enterobacteriales;Enterobacteriaceae;Escherichia-Shigella;uncultured_bacterium	93.28	253	3e-100
denovo1903	Singleton	1	0	0	0	1	0	0	AB513364.1.1437_Bacteria;Proteobacteria;Alphaproteobacteria;Rhodospirillales;Acetobacteraceae;Saccharibacter;alpha_proteobacterium_BCC_25711	96.84	253	9e-122
denovo1904	Singleton	1	0	0	0	1	0	0	X80775.1.1448_Bacteria;Proteobacteria;Alphaproteobacteria;Rhodospirillales;Acetobacteraceae;Gluconobacter;Gluconobacter_cerinus	95.65	253	1e-114
denovo1905	Singleton	1	0	1	0	0	0	0	JN456368.1.1355_Bacteria;Proteobacteria;Deltaproteobacteria;Desulfobacterales;Desulfobacteraceae;Desulfotignum;uncultured_organism	92.49	253	2e-95
denovo1906	Singleton	1	0	0	0	0	1	0	FJ517133.1.1528_Bacteria;Planctomycetes;OM190;uncultured_Planctomycetales_bacterium	93	243	2e-94
denovo1907	Singleton	1	0	1	0	0	0	0	EU652537.1.1505_Bacteria;Proteobacteria;Gammaproteobacteria;Thiotrichales;Piscirickettsiaceae;uncultured;uncultured_bacterium	94.07	253	5e-105
denovo1908	Singleton	1	0	1	0	0	0	0	GU584417.1.1396_Bacteria;Proteobacteria;Gammaproteobacteria;Thiotrichales;Piscirickettsiaceae;uncultured;uncultured_bacterium	93.68	253	1e-102
denovo1909	Singleton	1	0	1	0	0	0	0	JN175342.1.1527_Bacteria;Proteobacteria;Gammaproteobacteria;Enterobacteriales;Enterobacteriaceae;Tatumella;Tatumella_punctata	94.86	253	8e-110
denovo191	Singleton	1	0	0	0	0	1	0	FJ404760.1.1489_Bacteria;Proteobacteria;Gammaproteobacteria;Enterobacteriales;Enterobacteriaceae;Enterobacter;Mangrovibacter_sp._WG-1	95.65	253	1e-114
denovo1911	Singleton	1	0	0	0	1	0	0	JN175342.1.1527_Bacteria;Proteobacteria;Gammaproteobacteria;Enterobacteriales;Enterobacteriaceae;Tatumella;Tatumella_punctata	94.86	253	8e-110
denovo1912	Singleton	1	0	1	0	0	0	0	JN049601.1.1503_Bacteria;Proteobacteria;Gammaproteobacteria;Xanthomonadales;Xanthomonadaceae;Stenotrophomonas;Klebsiella_sp._Y6	95.26	253	3e-112
denovo1914	Singleton	1	0	0	1	0	0	0	FN396670.1.1413_Bacteria;Proteobacteria;Gammaproteobacteria;CS-B046;uncultured_marine_bacterium	95.65	253	1e-114
denovo1915	Singleton	1	0	0	1	0	0	0	JN175342.1.1527_Bacteria;Proteobacteria;Gammaproteobacteria;Enterobacteriales;Enterobacteriaceae;Tatumella;Tatumella_punctata	96.8	250	6e-120
denovo1916	Singleton	1	0	1	0	0	0	0	HM306002.1.1319_Bacteria;Cyanobacteria;Chloroplast;uncultured_eukaryote	98.02	253	6e-129
denovo1917	Singleton	1	0	0	0	0	0	1	JN175342.1.1527_Bacteria;Proteobacteria;Gammaproteobacteria;Enterobacteriales;Enterobacteriaceae;Tatumella;Tatumella_punctata	96.44	253	2e-119
denovo1918	Singleton	1	0	0	1	0	0	0	GU941096.1.1413_Bacteria;Proteobacteria;Gammaproteobacteria;Aeromonadales;Aeromonadaceae;Aeromonas;uncultured_bacterium	94.29	245	1e-102
denovo1919	Singleton	1	0	0	1	0	0	0	GQ102048.1.1364_Bacteria;Proteobacteria;Gammaproteobacteria;Enterobacteriales;Enterobacteriaceae;Yersinia;uncultured_bacterium	88.93	253	5e-74
denovo192	Singleton	1	0	0	0	1	0	0	X80775.1.1448_Bacteria;Proteobacteria;Alphaproteobacteria;Rhodospirillales;Acetobacteraceae;Gluconobacter;Gluconobacter_cerinus	96.05	253	5e-117
denovo1920	Singleton	1	0	0	0	1	0	0	X80775.1.1448_Bacteria;Proteobacteria;Alphaproteobacteria;Rhodospirillales;Acetobacteraceae;Gluconobacter;Gluconobacter_cerinus	94.86	253	8e-110
denovo1921	Singleton	1	0	0	1	0	0	0	JQ033771.1.1417_Bacteria;Proteobacteria;Epsilonproteobacteria;Campylobacterales;Helicobacteraceae;Sulfurovum;uncultured_Helicobacteraceae_bacterium	95.2	250	2e-110
denovo1923	Singleton	1	0	0	0	0	0	1	JN175342.1.1527_Bacteria;Proteobacteria;Gammaproteobacteria;Enterobacteriales;Enterobacteriaceae;Tatumella;Tatumella_punctata	96.84	253	9e-122
denovo1924	Singleton	1	0	0	1	0	0	0	JN662232.1.1476_Bacteria;Proteobacteria;Epsilonproteobacteria;Campylobacterales;Helicobacteraceae;Sulfurimonas;uncultured_epsilon_proteobacterium	92.89	253	7e-98
denovo1925	Singleton	1	0	1	0	0	0	0	DQ068818.1.1506_Bacteria;Proteobacteria;Gammaproteobacteria;Enterobacteriales;Enterobacteriaceae;Citrobacter;uncultured_bacterium	96.44	253	2e-119
denovo1926	Singleton	1	0	1	0	0	0	0	JN175342.1.1527_Bacteria;Proteobacteria;Gammaproteobacteria;Enterobacteriales;Enterobacteriaceae;Tatumella;Tatumella_punctata	94.93	217	3e-93
denovo1927	Singleton	1	0	0	0	0	1	0	JF119129.1.1361_Bacteria;Proteobacteria;Gammaproteobacteria;Enterobacteriales;Enterobacteriaceae;Klebsiella;uncultured_bacterium	92.89	253	7e-98
denovo1929	Singleton	1	1	0	0	0	0	0	AB530236.1.1479_Bacteria;Proteobacteria;Epsilonproteobacteria;Campylobacterales;Campylobacteraceae;Arcobacter;uncultured_bacterium	94.69	245	4e-105
denovo1930	Singleton	1	1	0	0	0	0	0	JN175342.1.1527_Bacteria;Proteobacteria;Gammaproteobacteria;Enterobacteriales;Enterobacteriaceae;Tatumella;Tatumella_punctata	95.65	253	1e-114
denovo1931	Singleton	1	0	1	0	0	0	0	JN175342.1.1527_Bacteria;Proteobacteria;Gammaproteobacteria;Enterobacteriales;Enterobacteriaceae;Tatumella;Tatumella_punctata	96.44	253	2e-119
denovo1932	Singleton	1	0	1	0	0	0	0	HQ189755.1.1434_Bacteria;Proteobacteria;Gammaproteobacteria;Pseudomonadales;Pseudomonadaceae;Pseudomonas;Pseudomonas_stutzeri	98.81	253	1e-133
denovo1933	Singleton	1	0	0	0	0	1	0	JN175342.1.1527_Bacteria;Proteobacteria;Gammaproteobacteria;Enterobacteriales;Enterobacteriaceae;Tatumella;Tatumella_punctata	95.26	253	3e-112
denovo1934	Singleton	1	0	1	0	0	0	0	HM556940.1.1327_Bacteria;Proteobacteria;Gammaproteobacteria;Enterobacteriales;Enterobacteriaceae;Escherichia-Shigella;uncultured_bacterium	94.47	253	2e-107
denovo1935	Singleton	1	0	1	0	0	0	0	JN175342.1.1527_Bacteria;Proteobacteria;Gammaproteobacteria;Enterobacteriales;Enterobacteriaceae;Tatumella;Tatumella_punctata	94.86	253	8e-110
denovo1936	Singleton	1	0	0	0	0	0	1	AB540148.1.1430_Bacteria;Proteobacteria;Alphaproteobacteria;Rhodospirillales;Acetobacteraceae;Gluconobacter;Gluconobacter_nephelii	90.91	253	6e-86
denovo1937	Singleton	1	0	1	0	0	0	0	JN874097.1.1464_Bacteria;Proteobacteria;Epsilonproteobacteria;Campylobacterales;Helicobacteraceae;Sulfurimonas;uncultured_bacterium	98.02	253	6e-129
denovo1938	Singleton	1	0	1	0	0	0	0	HM335046.1.1363_Bacteria;Proteobacteria;Gammaproteobacteria;Enterobacteriales;Enterobacteriaceae;Enterobacter;uncultured_bacterium	96.44	253	2e-119
denovo1939	Singleton	1	0	0	0	1	0	0	X80775.1.1448_Bacteria;Proteobacteria;Alphaproteobacteria;Rhodospirillales;Acetobacteraceae;Gluconobacter;Gluconobacter_cerinus	96.84	253	9e-122
denovo194	Singleton	1	1	0	0	0	0	0	JN175342.1.1527_Bacteria;Proteobacteria;Gammaproteobacteria;Enterobacteriales;Enterobacteriaceae;Tatumella;Tatumella_punctata	94.07	253	5e-105
denovo1941	Singleton	1	0	0	0	1	0	0	JN175342.1.1527_Bacteria;Proteobacteria;Gammaproteobacteria;Enterobacteriales;Enterobacteriaceae;Tatumella;Tatumella_punctata	95.2	250	2e-110
denovo1943	Singleton	1	1	0	0	0	0	0	GQ416312.1.1463_Bacteria;Proteobacteria;Gammaproteobacteria;Enterobacteriales;Enterobacteriaceae;Klebsiella;uncultured_Klebsiella_sp.	96.84	253	9e-122
denovo1944	Singleton	1	0	1	0	0	0	0	JN175342.1.1527_Bacteria;Proteobacteria;Gammaproteobacteria;Enterobacteriales;Enterobacteriaceae;Tatumella;Tatumella_punctata	95.26	253	3e-112
denovo1945	Singleton	1	0	1	0	0	0	0	EF509905.1.1477_Bacteria;Proteobacteria;Gammaproteobacteria;Enterobacteriales;Enterobacteriaceae;Klebsiella;uncultured_bacterium	96.84	253	9e-122
denovo1946	Singleton	1	0	0	0	1	0	0	JN175342.1.1527_Bacteria;Proteobacteria;Gammaproteobacteria;Enterobacteriales;Enterobacteriaceae;Tatumella;Tatumella_punctata	96.44	253	2e-119
denovo1947	Singleton	1	1	0	0	0	0	0	JN175342.1.1527_Bacteria;Proteobacteria;Gammaproteobacteria;Enterobacteriales;Enterobacteriaceae;Tatumella;Tatumella_punctata	95.65	253	1e-114
denovo1948	Singleton	1	1	0	0	0	0	0	JF268373.1.1520_Bacteria;Proteobacteria;Deltaproteobacteria;Desulfobacterales;Desulfobacteraceae;Desulfosalsimonas;uncultured_bacterium	94.47	253	2e-107
denovo1949	Singleton	1	0	0	0	0	1	0	JN990099.1.1503_Bacteria;Proteobacteria;Gammaproteobacteria;Enterobacteriales;Enterobacteriaceae;Enterobacter;uncultured_bacterium	92.8	250	4e-96
denovo1950	Singleton	1	1	0	0	0	0	0	JN175342.1.1527_Bacteria;Proteobacteria;Gammaproteobacteria;Enterobacteriales;Enterobacteriaceae;Tatumella;Tatumella_punctata	96.84	253	9e-122
denovo1951	Singleton	1	0	0	0	0	1	0	JN175342.1.1527_Bacteria;Proteobacteria;Gammaproteobacteria;Enterobacteriales;Enterobacteriaceae;Tatumella;Tatumella_punctata	96.77	217	9e-103
denovo1952	Singleton	1	1	0	0	0	0	0	AM236336.1.1505_Bacteria;Proteobacteria;Gammaproteobacteria;Order_Incertae_Sedis;Family_Incertae_Sedis;Sedimenticola;thiotrophic_gammaproteobacterial_endosymbiont_of_Lucinoma_aff._kazani	94.47	217	8e-91
denovo1953	Singleton	1	0	0	0	0	1	0	JQ318909.1.1370_Bacteria;Proteobacteria;Gammaproteobacteria;Enterobacteriales;Enterobacteriaceae;Erwinia;uncultured_Erwinia_sp.	97.2	250	2e-122
denovo1954	Singleton	1	0	1	0	0	0	0	JN175342.1.1527_Bacteria;Proteobacteria;Gammaproteobacteria;Enterobacteriales;Enterobacteriaceae;Tatumella;Tatumella_punctata	89.72	253	8e-79
denovo1955	Singleton	1	0	0	1	0	0	0	JN175342.1.1527_Bacteria;Proteobacteria;Gammaproteobacteria;Enterobacteriales;Enterobacteriaceae;Tatumella;Tatumella_punctata	95.65	253	1e-114
denovo1957	Singleton	1	0	0	0	0	0	1	JN175342.1.1527_Bacteria;Proteobacteria;Gammaproteobacteria;Enterobacteriales;Enterobacteriaceae;Tatumella;Tatumella_punctata	95.26	253	3e-112
denovo1958	Singleton	1	0	0	0	0	1	0	EF509857.1.1417_Bacteria;Proteobacteria;Gammaproteobacteria;Enterobacteriales;Enterobacteriaceae;Klebsiella;uncultured_bacterium	95.26	253	3e-112
denovo1959	Singleton	1	0	0	0	1	0	0	X80775.1.1448_Bacteria;Proteobacteria;Alphaproteobacteria;Rhodospirillales;Acetobacteraceae;Gluconobacter;Gluconobacter_cerinus	96.44	253	2e-119
denovo196	Singleton	1	0	0	0	0	0	1	JF706534.1.1396_Bacteria;Proteobacteria;Gammaproteobacteria;Enterobacteriales;Enterobacteriaceae;Erwinia;Erwinia_rhapontici	96.44	253	2e-119
denovo1960	Singleton	1	0	1	0	0	0	0	X93216.1.1495_Bacteria;Proteobacteria;Gammaproteobacteria;Enterobacteriales;Enterobacteriaceae;Raoultella;Raoultella_planticola	96.05	253	5e-117
denovo1961	Singleton	1	0	0	0	1	0	0	JN175342.1.1527_Bacteria;Proteobacteria;Gammaproteobacteria;Enterobacteriales;Enterobacteriaceae;Tatumella;Tatumella_punctata	96.05	253	5e-117
denovo1962	Singleton	1	0	0	0	0	0	1	FJ516918.1.1484_Bacteria;Bacteroidetes;SB-5;uncultured_Cytophagales_bacterium	94.44	216	3e-90
denovo1963	Singleton	1	0	1	0	0	0	0	JN990099.1.1503_Bacteria;Proteobacteria;Gammaproteobacteria;Enterobacteriales;Enterobacteriaceae;Enterobacter;uncultured_bacterium	93.28	253	3e-100
denovo1965	Singleton	1	0	0	0	0	0	1	FJ404760.1.1489_Bacteria;Proteobacteria;Gammaproteobacteria;Enterobacteriales;Enterobacteriaceae;Enterobacter;Mangrovibacter_sp._WG-1	96.05	253	5e-117
denovo1967	Singleton	1	0	1	0	0	0	0	JN175342.1.1527_Bacteria;Proteobacteria;Gammaproteobacteria;Enterobacteriales;Enterobacteriaceae;Tatumella;Tatumella_punctata	96.44	253	2e-119
denovo1968	Singleton	1	0	0	0	0	0	1	FJ712606.1.1476_Bacteria;Proteobacteria;Epsilonproteobacteria;Campylobacterales;Helicobacteraceae;Sulfurimonas;uncultured_bacterium	98	250	4e-127
denovo1969	Singleton	1	0	1	0	0	0	0	JN175342.1.1527_Bacteria;Proteobacteria;Gammaproteobacteria;Enterobacteriales;Enterobacteriaceae;Tatumella;Tatumella_punctata	96.8	250	6e-120
denovo197	Singleton	1	0	1	0	0	0	0	JN175342.1.1527_Bacteria;Proteobacteria;Gammaproteobacteria;Enterobacteriales;Enterobacteriaceae;Tatumella;Tatumella_punctata	94	250	3e-103
denovo1970	Singleton	1	1	0	0	0	0	0	DQ234105.1.1568_Bacteria;Proteobacteria;Gammaproteobacteria;Thiotrichales;Piscirickettsiaceae;uncultured;uncultured_Piscirickettsiaceae_bacterium	93.28	253	3e-100
denovo1971	Singleton	1	0	1	0	0	0	0	JN175342.1.1527_Bacteria;Proteobacteria;Gammaproteobacteria;Enterobacteriales;Enterobacteriaceae;Tatumella;Tatumella_punctata	96.84	253	9e-122
denovo1973	Singleton	1	1	0	0	0	0	0	HM557114.1.1377_Bacteria;Proteobacteria;Gammaproteobacteria;Enterobacteriales;Enterobacteriaceae;Enterobacter;uncultured_bacterium	94.07	253	5e-105
denovo1975	Singleton	1	0	0	0	0	0	1	JN175342.1.1527_Bacteria;Proteobacteria;Gammaproteobacteria;Enterobacteriales;Enterobacteriaceae;Tatumella;Tatumella_punctata	96.44	253	2e-119
denovo1976	Singleton	1	0	1	0	0	0	0	JN175342.1.1527_Bacteria;Proteobacteria;Gammaproteobacteria;Enterobacteriales;Enterobacteriaceae;Tatumella;Tatumella_punctata	95.26	253	3e-112
denovo1977	Singleton	1	0	0	0	0	0	1	JF706534.1.1396_Bacteria;Proteobacteria;Gammaproteobacteria;Enterobacteriales;Enterobacteriaceae;Erwinia;Erwinia_rhapontici	96.44	253	2e-119
denovo1978	Singleton	1	1	0	0	0	0	0	JN175342.1.1527_Bacteria;Proteobacteria;Gammaproteobacteria;Enterobacteriales;Enterobacteriaceae;Tatumella;Tatumella_punctata	96.44	253	2e-119
denovo1981	Singleton	1	1	0	0	0	0	0	HM779832.1.1381_Bacteria;Proteobacteria;Gammaproteobacteria;Enterobacteriales;Enterobacteriaceae;Citrobacter;uncultured_bacterium	96.05	253	5e-117
denovo1982	Singleton	1	0	0	1	0	0	0	EU289465.1.1506_Bacteria;Proteobacteria;Gammaproteobacteria;Enterobacteriales;Enterobacteriaceae;Trabulsiella;uncultured_bacterium	94.86	253	8e-110
denovo1983	Singleton	1	1	0	0	0	0	0	JN662041.1.1403_Bacteria;Proteobacteria;Epsilonproteobacteria;Campylobacterales;Helicobacteraceae;Sulfurovum;uncultured_proteobacterium	94.47	253	2e-107
denovo1984	Singleton	1	1	0	0	0	0	0	JN175342.1.1527_Bacteria;Proteobacteria;Gammaproteobacteria;Enterobacteriales;Enterobacteriaceae;Tatumella;Tatumella_punctata	95.65	253	1e-114
denovo1985	Singleton	1	0	0	0	0	0	1	JN175342.1.1527_Bacteria;Proteobacteria;Gammaproteobacteria;Enterobacteriales;Enterobacteriaceae;Tatumella;Tatumella_punctata	95.26	253	3e-112
denovo1986	Singleton	1	1	0	0	0	0	0	JN175342.1.1527_Bacteria;Proteobacteria;Gammaproteobacteria;Enterobacteriales;Enterobacteriaceae;Tatumella;Tatumella_punctata	94.07	253	5e-105
denovo1987	Singleton	1	0	0	1	0	0	0	EF469636.1.1317_Bacteria;Proteobacteria;Gammaproteobacteria;Enterobacteriales;Enterobacteriaceae;Candidatus_Stammerula;Candidatus_Stammerula_sp._of_Campiglossa_doronici	93.28	253	3e-100
denovo1988	Singleton	1	0	0	0	1	0	0	X80775.1.1448_Bacteria;Proteobacteria;Alphaproteobacteria;Rhodospirillales;Acetobacteraceae;Gluconobacter;Gluconobacter_cerinus	96.84	253	9e-122
denovo1989	Singleton	1	1	0	0	0	0	0	JN175342.1.1527_Bacteria;Proteobacteria;Gammaproteobacteria;Enterobacteriales;Enterobacteriaceae;Tatumella;Tatumella_punctata	97.57	247	6e-123
denovo199	Singleton	1	0	0	0	1	0	0	JN175342.1.1527_Bacteria;Proteobacteria;Gammaproteobacteria;Enterobacteriales;Enterobacteriaceae;Tatumella;Tatumella_punctata	95.6	250	8e-113
denovo1990	Singleton	1	0	0	1	0	0	0	JN175342.1.1527_Bacteria;Proteobacteria;Gammaproteobacteria;Enterobacteriales;Enterobacteriaceae;Tatumella;Tatumella_punctata	95.26	253	3e-112
denovo1991	Singleton	1	1	0	0	0	0	0	JN175342.1.1527_Bacteria;Proteobacteria;Gammaproteobacteria;Enterobacteriales;Enterobacteriaceae;Tatumella;Tatumella_punctata	96.44	253	2e-119
denovo1992	Singleton	1	0	1	0	0	0	0	JN175342.1.1527_Bacteria;Proteobacteria;Gammaproteobacteria;Enterobacteriales;Enterobacteriaceae;Tatumella;Tatumella_punctata	95.26	253	3e-112
denovo1993	Singleton	1	1	0	0	0	0	0	HM556457.1.1373_Bacteria;Proteobacteria;Gammaproteobacteria;Enterobacteriales;Enterobacteriaceae;Tatumella;uncultured_bacterium	94.07	253	5e-105
denovo1994	Singleton	1	0	1	0	0	0	0	JF496528.1.1461_Bacteria;Proteobacteria;Gammaproteobacteria;Aeromonadales;Aeromonadaceae;Aeromonas;Aeromonas_sharmana	96.84	253	9e-122
denovo1996	Singleton	1	0	1	0	0	0	0	JN175342.1.1527_Bacteria;Proteobacteria;Gammaproteobacteria;Enterobacteriales;Enterobacteriaceae;Tatumella;Tatumella_punctata	94.07	253	5e-105
denovo1998	Singleton	1	1	0	0	0	0	0	HM556940.1.1327_Bacteria;Proteobacteria;Gammaproteobacteria;Enterobacteriales;Enterobacteriaceae;Escherichia-Shigella;uncultured_bacterium	97.23	253	4e-124
denovo1999	Singleton	1	0	0	0	0	1	0	JF706534.1.1396_Bacteria;Proteobacteria;Gammaproteobacteria;Enterobacteriales;Enterobacteriaceae;Erwinia;Erwinia_rhapontici	96.84	253	9e-122
denovo20	Singleton	1	1	0	0	0	0	0	JN175342.1.1527_Bacteria;Proteobacteria;Gammaproteobacteria;Enterobacteriales;Enterobacteriaceae;Tatumella;Tatumella_punctata	94.86	253	8e-110
denovo200	Singleton	1	1	0	0	0	0	0	EF509905.1.1477_Bacteria;Proteobacteria;Gammaproteobacteria;Enterobacteriales;Enterobacteriaceae;Klebsiella;uncultured_bacterium	97.14	245	2e-119
denovo2000	Singleton	1	0	0	1	0	0	0	JN175342.1.1527_Bacteria;Proteobacteria;Gammaproteobacteria;Enterobacteriales;Enterobacteriaceae;Tatumella;Tatumella_punctata	95.65	253	1e-114
denovo2001	Singleton	1	1	0	0	0	0	0	JN990099.1.1503_Bacteria;Proteobacteria;Gammaproteobacteria;Enterobacteriales;Enterobacteriaceae;Enterobacter;uncultured_bacterium	94.86	253	8e-110
denovo2003	Singleton	1	0	0	1	0	0	0	JN194132.1.1320_Bacteria;Proteobacteria;Gammaproteobacteria;Enterobacteriales;Enterobacteriaceae;Pantoea;bacterium_MPB_JP_b	95.26	253	3e-112
denovo2005	Singleton	1	0	0	1	0	0	0	HQ190999.1.1454_Bacteria;Proteobacteria;Candidatus_Thiobios;uncultured_sediment_bacterium	97.63	253	2e-126
denovo2006	Singleton	1	0	1	0	0	0	0	JN194132.1.1320_Bacteria;Proteobacteria;Gammaproteobacteria;Enterobacteriales;Enterobacteriaceae;Pantoea;bacterium_MPB_JP_b	97.63	253	2e-126
denovo201	Singleton	1	0	1	0	0	0	0	AY922189.1.1377_Bacteria;Proteobacteria;Epsilonproteobacteria;Campylobacterales;Helicobacteraceae;Sulfurimonas;uncultured_epsilon_proteobacterium	93.68	253	1e-102
denovo2010	Singleton	1	0	0	0	1	0	0	GQ479991.1.1505_Bacteria;Proteobacteria;Gammaproteobacteria;Enterobacteriales;Enterobacteriaceae;Enterobacter;uncultured_bacterium	95.26	253	3e-100
denovo2011	Singleton	1	0	0	0	0	0	1	JN175342.1.1527_Bacteria;Proteobacteria;Gammaproteobacteria;Enterobacteriales;Enterobacteriaceae;Tatumella;Tatumella_punctata	95.65	253	1e-114
denovo2012	Singleton	1	0	0	0	0	0	1	FR684882.1.1497_Bacteria;Proteobacteria;Gammaproteobacteria;Oceanospirillales;Oceanospirillaceae;Marinobacterium;uncultured_marine_bacterium	94.86	253	8e-110
denovo2013	Singleton	1	0	1	0	0	0	0	JN175342.1.1527_Bacteria;Proteobacteria;Gammaproteobacteria;Enterobacteriales;Enterobacteriaceae;Tatumella;Tatumella_punctata	95.65	253	1e-114
denovo2016	Singleton	1	1	0	0	0	0	0	JN175342.1.1527_Bacteria;Proteobacteria;Gammaproteobacteria;Enterobacteriales;Enterobacteriaceae;Tatumella;Tatumella_punctata	94.47	253	2e-107
denovo2019	Singleton	1	0	1	0	0	0	0	FJ404760.1.1489_Bacteria;Proteobacteria;Gammaproteobacteria;Enterobacteriales;Enterobacteriaceae;Enterobacter;Mangrovibacter_sp._WG-1	90.91	253	6e-86
denovo202	Singleton	1	0	0	0	0	1	0	JF703600.1.1510_Bacteria;Proteobacteria;Gammaproteobacteria;Enterobacteriales;Enterobacteriaceae;Enterobacter;uncultured_Enterobacter_sp.	95.26	253	3e-100
denovo2020	Singleton	1	0	0	0	0	0	1	GQ416312.1.1463_Bacteria;Proteobacteria;Gammaproteobacteria;Enterobacteriales;Enterobacteriaceae;Klebsiella;uncultured_Klebsiella_sp.	96.84	253	9e-122
denovo2021	Singleton	1	0	1	0	0	0	0	HM556457.1.1373_Bacteria;Proteobacteria;Gammaproteobacteria;Enterobacteriales;Enterobacteriaceae;Tatumella;uncultured_bacterium	94.47	253	2e-107
denovo2022	Singleton	1	0	1	0	0	0	0	AM491469.1.1503_Bacteria;Proteobacteria;Gammaproteobacteria;Enterobacteriales;Enterobacteriaceae;Enterobacter;Enterobacter_sp._Nj-68	94.4	250	1e-105
denovo2023	Singleton	1	0	1	0	0	0	0	JF690979.1.1419_Bacteria;Proteobacteria;Gammaproteobacteria;Enterobacteriales;Enterobacteriaceae;Enterobacter;Enterobacter_ludwigii	96.44	253	2e-119
denovo2024	Singleton	1	0	1	0	0	0	0	JN175342.1.1527_Bacteria;Proteobacteria;Gammaproteobacteria;Enterobacteriales;Enterobacteriaceae;Tatumella;Tatumella_punctata	93.68	253	1e-102
denovo2026	Singleton	1	0	0	0	0	0	1	HQ225311.1.1448_Bacteria;Cyanobacteria;Chloroplast;uncultured_bacterium	97.63	253	2e-126
denovo2027	Singleton	1	0	1	0	0	0	0	JN194132.1.1320_Bacteria;Proteobacteria;Gammaproteobacteria;Enterobacteriales;Enterobacteriaceae;Pantoea;bacterium_MPB_JP_b	94.47	253	2e-107
denovo2029	Singleton	1	1	0	0	0	0	0	JN175342.1.1527_Bacteria;Proteobacteria;Gammaproteobacteria;Enterobacteriales;Enterobacteriaceae;Tatumella;Tatumella_punctata	96.84	253	9e-122
denovo203	Singleton	1	0	1	0	0	0	0	JN175342.1.1527_Bacteria;Proteobacteria;Gammaproteobacteria;Enterobacteriales;Enterobacteriaceae;Tatumella;Tatumella_punctata	94.01	217	2e-88
denovo2030	Singleton	1	0	0	1	0	0	0	AB032502.1.1444_Bacteria;Bacteroidetes;Flavobacteria;Flavobacteriales;Flavobacteriaceae;Tenacibaculum;Tenacibaculum_mesophilum	97.29	221	2e-107
denovo2031	Singleton	1	0	0	1	0	0	0	HM556474.1.1373_Bacteria;Proteobacteria;Gammaproteobacteria;Enterobacteriales;Enterobacteriaceae;Tatumella;uncultured_bacterium	94.86	253	8e-110
denovo2032	Singleton	1	0	0	1	0	0	0	JN175342.1.1527_Bacteria;Proteobacteria;Gammaproteobacteria;Enterobacteriales;Enterobacteriaceae;Tatumella;Tatumella_punctata	96.05	253	5e-117
denovo2033	Singleton	1	0	1	0	0	0	0	HQ697714.1.1488_Bacteria;Actinobacteria;Acidimicrobiia;Acidimicrobiales;uncultured;uncultured_bacterium	97.24	254	9e-125
denovo2034	Singleton	1	0	1	0	0	0	0	HQ203810.1.1476_Bacteria;Proteobacteria;Epsilonproteobacteria;Campylobacterales;Helicobacteraceae;Sulfurimonas;uncultured_bacterium	92.8	250	4e-96
denovo2035	Singleton	1	1	0	0	0	0	0	JN175342.1.1527_Bacteria;Proteobacteria;Gammaproteobacteria;Enterobacteriales;Enterobacteriaceae;Tatumella;Tatumella_punctata	96.05	253	5e-117
denovo2036	Singleton	1	0	0	0	1	0	0	JN175342.1.1527_Bacteria;Proteobacteria;Gammaproteobacteria;Enterobacteriales;Enterobacteriaceae;Tatumella;Tatumella_punctata	94.86	253	8e-110
denovo2038	Singleton	1	1	0	0	0	0	0	JN175342.1.1527_Bacteria;Proteobacteria;Gammaproteobacteria;Enterobacteriales;Enterobacteriaceae;Tatumella;Tatumella_punctata	94.86	253	8e-110
denovo204	Singleton	1	1	0	0	0	0	0	JF706534.1.1396_Bacteria;Proteobacteria;Gammaproteobacteria;Enterobacteriales;Enterobacteriaceae;Erwinia;Erwinia_rhapontici	95.26	253	3e-112
denovo2040	Singleton	1	0	1	0	0	0	0	DQ532141.1.1484_Bacteria;Deinococcus-Thermus;Deinococci;Deinococcales;Deinococcaceae;Deinococcus;uncultured_bacterium	99.59	242	6e-132
denovo2041	Singleton	1	0	1	0	0	0	0	JN175342.1.1527_Bacteria;Proteobacteria;Gammaproteobacteria;Enterobacteriales;Enterobacteriaceae;Tatumella;Tatumella_punctata	94.86	253	8e-110
denovo2042	Singleton	1	0	0	0	0	1	0	JN175342.1.1527_Bacteria;Proteobacteria;Gammaproteobacteria;Enterobacteriales;Enterobacteriaceae;Tatumella;Tatumella_punctata	95.6	250	8e-113
denovo2044	Singleton	1	0	0	1	0	0	0	EU707309.1.1491_Bacteria;Proteobacteria;Gammaproteobacteria;Alteromonadales;Alteromonadaceae;Haliea;uncultured_bacterium	98.02	253	6e-129
denovo2045	Singleton	1	1	0	0	0	0	0	DQ831535.1.1500_Bacteria;Proteobacteria;Deltaproteobacteria;Desulfobacterales;Desulfobulbaceae;uncultured;uncultured_delta_proteobacterium	93.68	253	1e-102
denovo2046	Singleton	1	1	0	0	0	0	0	JN175342.1.1527_Bacteria;Proteobacteria;Gammaproteobacteria;Enterobacteriales;Enterobacteriaceae;Tatumella;Tatumella_punctata	96.84	253	9e-122
denovo2047	Singleton	1	0	1	0	0	0	0	JF690979.1.1419_Bacteria;Proteobacteria;Gammaproteobacteria;Enterobacteriales;Enterobacteriaceae;Enterobacter;Enterobacter_ludwigii	95.26	253	3e-112
denovo2049	Singleton	1	0	0	0	1	0	0	JF706534.1.1396_Bacteria;Proteobacteria;Gammaproteobacteria;Enterobacteriales;Enterobacteriaceae;Erwinia;Erwinia_rhapontici	95.65	253	1e-114
denovo2050	Singleton	1	0	1	0	0	0	0	JN175342.1.1527_Bacteria;Proteobacteria;Gammaproteobacteria;Enterobacteriales;Enterobacteriaceae;Tatumella;Tatumella_punctata	96.44	253	2e-119
denovo2051	Singleton	1	0	1	0	0	0	0	JN175342.1.1527_Bacteria;Proteobacteria;Gammaproteobacteria;Enterobacteriales;Enterobacteriaceae;Tatumella;Tatumella_punctata	93.68	253	1e-102
denovo2052	Singleton	1	0	1	0	0	0	0	JN175342.1.1527_Bacteria;Proteobacteria;Gammaproteobacteria;Enterobacteriales;Enterobacteriaceae;Tatumella;Tatumella_punctata	96.44	253	2e-119
denovo2053	Singleton	1	0	0	0	0	1	0	GU061241.1.1423_Bacteria;Bacteroidetes;Flavobacteria;Flavobacteriales;Flavobacteriaceae;Muricola;uncultured_Bacteroidetes_bacterium	96.84	253	9e-122
denovo2055	Singleton	1	0	0	1	0	0	0	GQ261812.1.1404_Bacteria;Proteobacteria;Epsilonproteobacteria;Campylobacterales;Helicobacteraceae;Sulfurimonas;uncultured_epsilon_proteobacterium	96.05	253	5e-117
denovo2056	Singleton	1	0	0	0	0	0	1	JF690979.1.1419_Bacteria;Proteobacteria;Gammaproteobacteria;Enterobacteriales;Enterobacteriaceae;Enterobacter;Enterobacter_ludwigii	96.4	250	1e-117
denovo2057	Singleton	1	0	0	0	0	0	1	JN175342.1.1527_Bacteria;Proteobacteria;Gammaproteobacteria;Enterobacteriales;Enterobacteriaceae;Tatumella;Tatumella_punctata	96.44	253	2e-119
denovo2058	Singleton	1	1	0	0	0	0	0	JN175342.1.1527_Bacteria;Proteobacteria;Gammaproteobacteria;Enterobacteriales;Enterobacteriaceae;Tatumella;Tatumella_punctata	95.65	253	1e-102
denovo2059	Singleton	1	1	0	0	0	0	0	JN175342.1.1527_Bacteria;Proteobacteria;Gammaproteobacteria;Enterobacteriales;Enterobacteriaceae;Tatumella;Tatumella_punctata	93.28	253	3e-100
denovo2060	Singleton	1	1	0	0	0	0	0	EU289465.1.1506_Bacteria;Proteobacteria;Gammaproteobacteria;Enterobacteriales;Enterobacteriaceae;Trabulsiella;uncultured_bacterium	97.23	253	4e-124
denovo2061	Singleton	1	0	0	0	0	1	0	EU700176.1.1509_Bacteria;Proteobacteria;Gammaproteobacteria;Chromatiales;Ectothiorhodospiraceae;Thioalkalispira;uncultured_bacterium	94.86	253	8e-110
denovo2062	Singleton	1	0	1	0	0	0	0	JN175342.1.1527_Bacteria;Proteobacteria;Gammaproteobacteria;Enterobacteriales;Enterobacteriaceae;Tatumella;Tatumella_punctata	95.65	253	1e-114
denovo2063	Singleton	1	1	0	0	0	0	0	HM556852.1.1374_Bacteria;Proteobacteria;Gammaproteobacteria;Enterobacteriales;Enterobacteriaceae;Tatumella;uncultured_bacterium	95.26	253	3e-112
denovo2064	Singleton	1	0	1	0	0	0	0	JN990099.1.1503_Bacteria;Proteobacteria;Gammaproteobacteria;Enterobacteriales;Enterobacteriaceae;Enterobacter;uncultured_bacterium	93.28	253	3e-100
denovo2067	Singleton	1	0	0	0	0	0	1	JN175342.1.1527_Bacteria;Proteobacteria;Gammaproteobacteria;Enterobacteriales;Enterobacteriaceae;Tatumella;Tatumella_punctata	95.65	253	1e-102
denovo2068	Singleton	1	0	0	0	0	1	0	JN175342.1.1527_Bacteria;Proteobacteria;Gammaproteobacteria;Enterobacteriales;Enterobacteriaceae;Tatumella;Tatumella_punctata	95.65	253	1e-114
denovo207	Singleton	1	0	0	1	0	0	0	JN532272.1.1487_Bacteria;Proteobacteria;Deltaproteobacteria;Desulfobacterales;Desulfobacteraceae;Desulfosarcina;uncultured_organism	98.42	253	3e-131
denovo2070	Singleton	1	0	0	0	0	0	1	JF706534.1.1396_Bacteria;Proteobacteria;Gammaproteobacteria;Enterobacteriales;Enterobacteriaceae;Erwinia;Erwinia_rhapontici	97.19	249	9e-122
denovo2071	Singleton	1	0	1	0	0	0	0	AM404370.1.1526_Bacteria;Proteobacteria;Deltaproteobacteria;Desulfobacterales;Desulfobacteraceae;SEEP-SRB1;uncultured_delta_proteobacterium	95.1	245	2e-107
denovo2072	Singleton	1	0	0	0	0	1	0	JN175342.1.1527_Bacteria;Proteobacteria;Gammaproteobacteria;Enterobacteriales;Enterobacteriaceae;Tatumella;Tatumella_punctata	96.84	253	8e-110
denovo2073	Singleton	1	0	0	0	0	0	1	JN175342.1.1527_Bacteria;Proteobacteria;Gammaproteobacteria;Enterobacteriales;Enterobacteriaceae;Tatumella;Tatumella_punctata	95.65	253	1e-114
denovo2074	Singleton	1	0	0	0	0	1	0	EU487967.1.1474_Bacteria;Proteobacteria;Epsilonproteobacteria;Campylobacterales;Helicobacteraceae;Sulfurimonas;uncultured_bacterium	95.26	253	3e-112
denovo2075	Singleton	1	0	0	0	0	1	0	JF958137.1.1407_Bacteria;Proteobacteria;Gammaproteobacteria;Enterobacteriales;Enterobacteriaceae;Pectobacterium;Erwinia_sp._JSC-N3-112-2	97.23	253	4e-124
denovo2076	Singleton	1	0	0	0	0	0	1	JN175342.1.1527_Bacteria;Proteobacteria;Gammaproteobacteria;Enterobacteriales;Enterobacteriaceae;Tatumella;Tatumella_punctata	94.47	253	2e-107
denovo2077	Singleton	1	0	1	0	0	0	0	JN175342.1.1527_Bacteria;Proteobacteria;Gammaproteobacteria;Enterobacteriales;Enterobacteriaceae;Tatumella;Tatumella_punctata	96.05	253	5e-117
denovo2079	Singleton	1	0	1	0	0	0	0	JN175342.1.1527_Bacteria;Proteobacteria;Gammaproteobacteria;Enterobacteriales;Enterobacteriaceae;Tatumella;Tatumella_punctata	96.84	253	9e-122
denovo208	Singleton	1	1	0	0	0	0	0	JN175342.1.1527_Bacteria;Proteobacteria;Gammaproteobacteria;Enterobacteriales;Enterobacteriaceae;Tatumella;Tatumella_punctata	94.86	253	8e-110
denovo2080	Singleton	1	0	1	0	0	0	0	HQ916625.1.1390_Bacteria;Firmicutes;Clostridia;Clostridiales;Lachnospiraceae;uncultured;uncultured_bacterium	95.65	253	8e-116
denovo2082	Singleton	1	0	0	0	0	0	1	JN613470.1.1451_Bacteria;Proteobacteria;Gammaproteobacteria;Enterobacteriales;Enterobacteriaceae;Enterobacter;Leclercia_sp._O-NR2	96.05	253	5e-117
denovo2083	Singleton	1	1	0	0	0	0	0	JN175342.1.1527_Bacteria;Proteobacteria;Gammaproteobacteria;Enterobacteriales;Enterobacteriaceae;Tatumella;Tatumella_punctata	97.2	250	2e-122
denovo2084	Singleton	1	0	0	0	1	0	0	HQ691915.1.1363_Bacteria;Firmicutes;Clostridia;Clostridiales;Lachnospiraceae;uncultured;uncultured_bacterium	91.3	253	2e-88
denovo2085	Singleton	1	0	0	0	1	0	0	X80775.1.1448_Bacteria;Proteobacteria;Alphaproteobacteria;Rhodospirillales;Acetobacteraceae;Gluconobacter;Gluconobacter_cerinus	97.07	239	8e-116
denovo2086	Singleton	1	1	0	0	0	0	0	HM558240.1.1372_Bacteria;Proteobacteria;Gammaproteobacteria;Enterobacteriales;Enterobacteriaceae;Tatumella;uncultured_bacterium	94.86	253	8e-110
denovo2087	Singleton	1	1	0	0	0	0	0	GU584306.1.1398_Bacteria;Proteobacteria;Gammaproteobacteria;Thiotrichales;Piscirickettsiaceae;uncultured;uncultured_bacterium	96.05	253	5e-117
denovo2089	Singleton	1	1	0	0	0	0	0	JN977155.1.1529_Bacteria;Proteobacteria;Gammaproteobacteria;Chromatiales;Granulosicoccaceae;Granulosicoccus;uncultured_bacterium	92.09	253	4e-93
denovo2090	Singleton	1	0	1	0	0	0	0	JN613470.1.1451_Bacteria;Proteobacteria;Gammaproteobacteria;Enterobacteriales;Enterobacteriaceae;Enterobacter;Leclercia_sp._O-NR2	92.89	253	7e-98
denovo2091	Singleton	1	0	0	0	1	0	0	HQ191061.1.1500_Bacteria;Proteobacteria;Gammaproteobacteria;Order_Incertae_Sedis;Family_Incertae_Sedis;Sedimenticola;uncultured_sediment_bacterium	95.65	253	1e-114
denovo2092	Singleton	1	1	0	0	0	0	0	JN175342.1.1527_Bacteria;Proteobacteria;Gammaproteobacteria;Enterobacteriales;Enterobacteriaceae;Tatumella;Tatumella_punctata	96.05	253	5e-117
denovo2094	Singleton	1	0	1	0	0	0	0	JN175342.1.1527_Bacteria;Proteobacteria;Gammaproteobacteria;Enterobacteriales;Enterobacteriaceae;Tatumella;Tatumella_punctata	94.86	253	8e-110
denovo2095	Singleton	1	0	0	0	0	1	0	JN175342.1.1527_Bacteria;Proteobacteria;Gammaproteobacteria;Enterobacteriales;Enterobacteriaceae;Tatumella;Tatumella_punctata	86.59	246	6e-58
denovo2096	Singleton	1	0	0	0	0	1	0	EU289465.1.1506_Bacteria;Proteobacteria;Gammaproteobacteria;Enterobacteriales;Enterobacteriaceae;Trabulsiella;uncultured_bacterium	96.05	253	5e-117
denovo2097	Singleton	1	0	0	0	1	0	0	JN537304.1.1504_Bacteria;Proteobacteria;Deltaproteobacteria;Desulfobacterales;Desulfobacteraceae;uncultured;uncultured_organism	95.65	253	1e-114
denovo2099	Singleton	1	0	1	0	0	0	0	JN175342.1.1527_Bacteria;Proteobacteria;Gammaproteobacteria;Enterobacteriales;Enterobacteriaceae;Tatumella;Tatumella_punctata	94.86	253	8e-110
denovo21	Singleton	1	0	0	0	0	1	0	JN175342.1.1527_Bacteria;Proteobacteria;Gammaproteobacteria;Enterobacteriales;Enterobacteriaceae;Tatumella;Tatumella_punctata	96.4	250	1e-117
denovo210	Singleton	1	1	0	0	0	0	0	JN175342.1.1527_Bacteria;Proteobacteria;Gammaproteobacteria;Enterobacteriales;Enterobacteriaceae;Tatumella;Tatumella_punctata	94.47	253	2e-107
denovo2101	Singleton	1	0	0	0	0	0	1	U83098.1.1385_Bacteria;Proteobacteria;Alphaproteobacteria;Rickettsiales;Anaplasmataceae;Wolbachia;Wolbachia_sp.	96.84	253	9e-122
denovo2102	Singleton	1	0	0	0	1	0	0	JF224715.1.1335_Bacteria;Actinobacteria;Actinobacteria;Corynebacteriales;Dietziaceae;Dietzia;uncultured_bacterium	100	253	7e-141
denovo2103	Singleton	1	0	0	1	0	0	0	JN175342.1.1527_Bacteria;Proteobacteria;Gammaproteobacteria;Enterobacteriales;Enterobacteriaceae;Tatumella;Tatumella_punctata	95.26	253	3e-112
denovo2104	Singleton	1	0	0	0	1	0	0	EF509905.1.1477_Bacteria;Proteobacteria;Gammaproteobacteria;Enterobacteriales;Enterobacteriaceae;Klebsiella;uncultured_bacterium	96.84	253	9e-122
denovo2105	Singleton	1	1	0	0	0	0	0	JN175342.1.1527_Bacteria;Proteobacteria;Gammaproteobacteria;Enterobacteriales;Enterobacteriaceae;Tatumella;Tatumella_punctata	94.86	253	8e-110
denovo2106	Singleton	1	0	0	0	1	0	0	JN175342.1.1527_Bacteria;Proteobacteria;Gammaproteobacteria;Enterobacteriales;Enterobacteriaceae;Tatumella;Tatumella_punctata	94.86	253	8e-110
denovo2107	Singleton	1	0	1	0	0	0	0	JN175342.1.1527_Bacteria;Proteobacteria;Gammaproteobacteria;Enterobacteriales;Enterobacteriaceae;Tatumella;Tatumella_punctata	96.84	253	9e-122
denovo2108	Singleton	1	0	1	0	0	0	0	JN175342.1.1527_Bacteria;Proteobacteria;Gammaproteobacteria;Enterobacteriales;Enterobacteriaceae;Tatumella;Tatumella_punctata	96.84	253	1e-111
denovo2109	Singleton	1	0	0	0	1	0	0	HQ588555.1.1529_Bacteria;Proteobacteria;Deltaproteobacteria;Desulfobacterales;Desulfobacteraceae;SEEP-SRB1;uncultured_bacterium	94.07	253	5e-105
denovo211	Singleton	1	1	0	0	0	0	0	AB021400.1.1522_Bacteria;Proteobacteria;Gammaproteobacteria;Enterobacteriales;Enterobacteriaceae;Tatumella;Pseudomonas_flectens	96.84	253	9e-122
denovo2110	Singleton	1	1	0	0	0	0	0	HM557327.1.1357_Bacteria;Proteobacteria;Gammaproteobacteria;Enterobacteriales;Enterobacteriaceae;Enterobacter;uncultured_bacterium	94.47	253	2e-107
denovo2111	Singleton	1	0	0	0	0	1	0	JN175342.1.1527_Bacteria;Proteobacteria;Gammaproteobacteria;Enterobacteriales;Enterobacteriaceae;Tatumella;Tatumella_punctata	96.05	253	5e-117
denovo2112	Singleton	1	0	0	0	0	0	1	JF706534.1.1396_Bacteria;Proteobacteria;Gammaproteobacteria;Enterobacteriales;Enterobacteriaceae;Erwinia;Erwinia_rhapontici	96.44	253	2e-119
denovo2113	Singleton	1	0	1	0	0	0	0	JF119129.1.1361_Bacteria;Proteobacteria;Gammaproteobacteria;Enterobacteriales;Enterobacteriaceae;Klebsiella;uncultured_bacterium	91.7	253	1e-90
denovo2114	Singleton	1	0	1	0	0	0	0	JN175342.1.1527_Bacteria;Proteobacteria;Gammaproteobacteria;Enterobacteriales;Enterobacteriaceae;Tatumella;Tatumella_punctata	93.28	253	3e-100
denovo2115	Singleton	1	0	0	0	0	0	1	JN175342.1.1527_Bacteria;Proteobacteria;Gammaproteobacteria;Enterobacteriales;Enterobacteriaceae;Tatumella;Tatumella_punctata	95.26	253	3e-112
denovo2116	Singleton	1	1	0	0	0	0	0	JN175342.1.1527_Bacteria;Proteobacteria;Gammaproteobacteria;Enterobacteriales;Enterobacteriaceae;Tatumella;Tatumella_punctata	94.47	253	2e-107
denovo2119	Singleton	1	0	1	0	0	0	0	HM558240.1.1372_Bacteria;Proteobacteria;Gammaproteobacteria;Enterobacteriales;Enterobacteriaceae;Tatumella;uncultured_bacterium	96.84	253	9e-122
denovo212	Singleton	1	0	1	0	0	0	0	JF344268.1.1520_Bacteria;Proteobacteria;Deltaproteobacteria;Desulfobacterales;Desulfobacteraceae;Desulfobacula;uncultured_delta_proteobacterium	97.52	242	5e-120
denovo2120	Singleton	1	0	0	0	0	1	0	HM558240.1.1372_Bacteria;Proteobacteria;Gammaproteobacteria;Enterobacteriales;Enterobacteriaceae;Tatumella;uncultured_bacterium	95.93	246	8e-113
denovo2122	Singleton	1	0	0	0	0	0	1	DQ011254.1.1445_Bacteria;Proteobacteria;Gammaproteobacteria;Enterobacteriales;Enterobacteriaceae;Enterobacter;uncultured_bacterium	92.4	250	1e-93
denovo2123	Singleton	1	0	1	0	0	0	0	JN990099.1.1503_Bacteria;Proteobacteria;Gammaproteobacteria;Enterobacteriales;Enterobacteriaceae;Enterobacter;uncultured_bacterium	94.07	253	5e-105
denovo2124	Singleton	1	0	0	1	0	0	0	JN194132.1.1320_Bacteria;Proteobacteria;Gammaproteobacteria;Enterobacteriales;Enterobacteriaceae;Pantoea;bacterium_MPB_JP_b	96.44	253	2e-119
denovo2125	Singleton	1	0	1	0	0	0	0	JN175342.1.1527_Bacteria;Proteobacteria;Gammaproteobacteria;Enterobacteriales;Enterobacteriaceae;Tatumella;Tatumella_punctata	92.49	253	2e-95
denovo2126	Singleton	1	0	0	0	0	1	0	JN175342.1.1527_Bacteria;Proteobacteria;Gammaproteobacteria;Enterobacteriales;Enterobacteriaceae;Tatumella;Tatumella_punctata	93.6	250	7e-101
denovo2128	Singleton	1	0	0	0	0	1	0	JN175342.1.1527_Bacteria;Proteobacteria;Gammaproteobacteria;Enterobacteriales;Enterobacteriaceae;Tatumella;Tatumella_punctata	96.71	243	8e-116
denovo213	Singleton	1	0	0	0	1	0	0	JN175342.1.1527_Bacteria;Proteobacteria;Gammaproteobacteria;Enterobacteriales;Enterobacteriaceae;Tatumella;Tatumella_punctata	96.05	253	5e-117
denovo2130	Singleton	1	0	1	0	0	0	0	JN049601.1.1503_Bacteria;Proteobacteria;Gammaproteobacteria;Xanthomonadales;Xanthomonadaceae;Stenotrophomonas;Klebsiella_sp._Y6	95.65	253	1e-114
denovo2131	Singleton	1	0	1	0	0	0	0	JN175342.1.1527_Bacteria;Proteobacteria;Gammaproteobacteria;Enterobacteriales;Enterobacteriaceae;Tatumella;Tatumella_punctata	94.47	253	2e-107
denovo2132	Singleton	1	1	0	0	0	0	0	JN175342.1.1527_Bacteria;Proteobacteria;Gammaproteobacteria;Enterobacteriales;Enterobacteriaceae;Tatumella;Tatumella_punctata	96.05	253	5e-117
denovo2133	Singleton	1	0	0	0	0	0	1	JN194132.1.1320_Bacteria;Proteobacteria;Gammaproteobacteria;Enterobacteriales;Enterobacteriaceae;Pantoea;bacterium_MPB_JP_b	95.26	253	3e-112
denovo2134	Singleton	1	0	0	0	0	0	1	HM556761.1.1322_Bacteria;Proteobacteria;Alphaproteobacteria;Rhodospirillales;Acetobacteraceae;Acetobacter;uncultured_bacterium	97.23	253	4e-124
denovo2135	Singleton	1	0	1	0	0	0	0	HM558240.1.1372_Bacteria;Proteobacteria;Gammaproteobacteria;Enterobacteriales;Enterobacteriaceae;Tatumella;uncultured_bacterium	97.23	253	4e-124
denovo2136	Singleton	1	0	0	0	1	0	0	JN977308.1.1493_Bacteria;Proteobacteria;Alphaproteobacteria;Rickettsiales;TK34;uncultured_bacterium	98.35	243	2e-125
denovo2137	Singleton	1	1	0	0	0	0	0	JF706534.1.1396_Bacteria;Proteobacteria;Gammaproteobacteria;Enterobacteriales;Enterobacteriaceae;Erwinia;Erwinia_rhapontici	96.84	253	9e-122
denovo2138	Singleton	1	0	1	0	0	0	0	FR684202.1.1485_Bacteria;Proteobacteria;Gammaproteobacteria;Alteromonadales;Alteromonadaceae;SAR92_clade;uncultured_marine_bacterium	100	253	7e-141
denovo2139	Singleton	1	1	0	0	0	0	0	JN990099.1.1503_Bacteria;Proteobacteria;Gammaproteobacteria;Enterobacteriales;Enterobacteriaceae;Enterobacter;uncultured_bacterium	94.86	253	7e-98
denovo214	Singleton	1	0	1	0	0	0	0	HQ203810.1.1476_Bacteria;Proteobacteria;Epsilonproteobacteria;Campylobacterales;Helicobacteraceae;Sulfurimonas;uncultured_bacterium	95.6	250	8e-113
denovo2140	Singleton	1	0	0	0	1	0	0	JN175342.1.1527_Bacteria;Proteobacteria;Gammaproteobacteria;Enterobacteriales;Enterobacteriaceae;Tatumella;Tatumella_punctata	96.84	253	9e-122
denovo2141	Singleton	1	1	0	0	0	0	0	JN613470.1.1451_Bacteria;Proteobacteria;Gammaproteobacteria;Enterobacteriales;Enterobacteriaceae;Enterobacter;Leclercia_sp._O-NR2	96.84	253	9e-122
denovo2142	Singleton	1	0	0	0	1	0	0	JN175342.1.1527_Bacteria;Proteobacteria;Gammaproteobacteria;Enterobacteriales;Enterobacteriaceae;Tatumella;Tatumella_punctata	94.86	253	8e-110
denovo2143	Singleton	1	0	0	0	0	0	1	JN175342.1.1527_Bacteria;Proteobacteria;Gammaproteobacteria;Enterobacteriales;Enterobacteriaceae;Tatumella;Tatumella_punctata	97.58	248	1e-123
denovo2144	Singleton	1	0	0	0	0	1	0	JN990099.1.1503_Bacteria;Proteobacteria;Gammaproteobacteria;Enterobacteriales;Enterobacteriaceae;Enterobacter;uncultured_bacterium	94.47	253	2e-107
denovo2145	Singleton	1	0	0	0	0	1	0	JN175342.1.1527_Bacteria;Proteobacteria;Gammaproteobacteria;Enterobacteriales;Enterobacteriaceae;Tatumella;Tatumella_punctata	95.65	253	1e-114
denovo2146	Singleton	1	0	0	0	0	0	1	GU197431.1.1506_Bacteria;Proteobacteria;Deltaproteobacteria;Desulfobacterales;Desulfobulbaceae;uncultured;uncultured_bacterium	94.86	253	8e-110
denovo2147	Singleton	1	0	1	0	0	0	0	JN194132.1.1320_Bacteria;Proteobacteria;Gammaproteobacteria;Enterobacteriales;Enterobacteriaceae;Pantoea;bacterium_MPB_JP_b	94.86	253	8e-110
denovo2148	Singleton	1	0	0	0	0	0	1	JN175342.1.1527_Bacteria;Proteobacteria;Gammaproteobacteria;Enterobacteriales;Enterobacteriaceae;Tatumella;Tatumella_punctata	96.44	253	2e-119
denovo215	Singleton	1	0	0	0	0	0	1	JN513710.1.1423_Bacteria;Chloroflexi;Caldilineae;Caldilineales;Caldilineaceae;uncultured;uncultured_organism	92.89	253	7e-98
denovo2150	Singleton	1	1	0	0	0	0	0	HM556457.1.1373_Bacteria;Proteobacteria;Gammaproteobacteria;Enterobacteriales;Enterobacteriaceae;Tatumella;uncultured_bacterium	95.26	253	3e-100
denovo2151	Singleton	1	0	1	0	0	0	0	FJ716961.1.1547_Bacteria;Proteobacteria;Deltaproteobacteria;Desulfovibrionales;Desulfovibrionaceae;Desulfovibrio;uncultured_bacterium	94.47	253	2e-107
denovo2152	Singleton	1	0	1	0	0	0	0	HQ203810.1.1476_Bacteria;Proteobacteria;Epsilonproteobacteria;Campylobacterales;Helicobacteraceae;Sulfurimonas;uncultured_bacterium	94.8	250	5e-108
denovo2155	Singleton	1	0	0	0	0	1	0	JN990099.1.1503_Bacteria;Proteobacteria;Gammaproteobacteria;Enterobacteriales;Enterobacteriaceae;Enterobacter;uncultured_bacterium	97.23	253	4e-124
denovo2156	Singleton	1	1	0	0	0	0	0	HQ153883.1.1390_Bacteria;Proteobacteria;Gammaproteobacteria;Chromatiales;Granulosicoccaceae;Granulosicoccus;uncultured_bacterium	94.86	253	8e-110
denovo2157	Singleton	1	0	0	0	0	0	1	JN018473.1.1400_Bacteria;Proteobacteria;Gammaproteobacteria;Alteromonadales;Colwelliaceae;Colwellia;uncultured_bacterium	96.44	253	2e-119
denovo2158	Singleton	1	0	0	0	0	0	1	GU941096.1.1413_Bacteria;Proteobacteria;Gammaproteobacteria;Aeromonadales;Aeromonadaceae;Aeromonas;uncultured_bacterium	94.86	253	8e-110
denovo2159	Singleton	1	1	0	0	0	0	0	JN175342.1.1527_Bacteria;Proteobacteria;Gammaproteobacteria;Enterobacteriales;Enterobacteriaceae;Tatumella;Tatumella_punctata	96.44	253	2e-119
denovo2160	Singleton	1	1	0	0	0	0	0	JN194132.1.1320_Bacteria;Proteobacteria;Gammaproteobacteria;Enterobacteriales;Enterobacteriaceae;Pantoea;bacterium_MPB_JP_b	94.86	253	8e-110
denovo2163	Singleton	1	0	0	1	0	0	0	JN175342.1.1527_Bacteria;Proteobacteria;Gammaproteobacteria;Enterobacteriales;Enterobacteriaceae;Tatumella;Tatumella_punctata	96.44	253	2e-119
denovo2164	Singleton	1	0	0	1	0	0	0	JN387430.1.1308_Bacteria;Proteobacteria;Deltaproteobacteria;Desulfobacterales;Desulfobacteraceae;uncultured;uncultured_microorganism	93.85	244	1e-99
denovo2165	Singleton	1	0	0	1	0	0	0	GQ479991.1.1505_Bacteria;Proteobacteria;Gammaproteobacteria;Enterobacteriales;Enterobacteriaceae;Enterobacter;uncultured_bacterium	94.07	253	4e-93
denovo2166	Singleton	1	0	1	0	0	0	0	HQ916532.1.1405_Bacteria;Proteobacteria;Gammaproteobacteria;Order_Incertae_Sedis;Family_Incertae_Sedis;Thiohalophilus;uncultured_bacterium	94.47	253	2e-107
denovo2167	Singleton	1	0	0	0	0	0	1	JN175342.1.1527_Bacteria;Proteobacteria;Gammaproteobacteria;Enterobacteriales;Enterobacteriaceae;Tatumella;Tatumella_punctata	97.22	252	1e-123
denovo2168	Singleton	1	1	0	0	0	0	0	JN175342.1.1527_Bacteria;Proteobacteria;Gammaproteobacteria;Enterobacteriales;Enterobacteriaceae;Tatumella;Tatumella_punctata	96.84	253	9e-122
denovo217	Singleton	1	0	1	0	0	0	0	JN035217.1.1416_Bacteria;Proteobacteria;Gammaproteobacteria;Aeromonadales;Aeromonadaceae;Aeromonas;bacterium_SUTW_73	96.05	253	5e-117
denovo2170	Singleton	1	0	1	0	0	0	0	DQ011254.1.1445_Bacteria;Proteobacteria;Gammaproteobacteria;Enterobacteriales;Enterobacteriaceae;Enterobacter;uncultured_bacterium	93.68	253	1e-102
denovo2171	Singleton	1	0	0	0	1	0	0	HQ787611.1.1463_Bacteria;Proteobacteria;Gammaproteobacteria;Enterobacteriales;Enterobacteriaceae;Enterobacter;uncultured_organism	94.07	253	5e-105
denovo2172	Singleton	1	0	1	0	0	0	0	JF915349.1.1403_Bacteria;Proteobacteria;Gammaproteobacteria;Enterobacteriales;Enterobacteriaceae;Kluyvera;Buttiauxella_sp._NW51	95.65	253	1e-114
denovo2173	Singleton	1	0	1	0	0	0	0	JN175342.1.1527_Bacteria;Proteobacteria;Gammaproteobacteria;Enterobacteriales;Enterobacteriaceae;Tatumella;Tatumella_punctata	94.07	253	5e-105
denovo2174	Singleton	1	0	0	0	0	1	0	JN175342.1.1527_Bacteria;Proteobacteria;Gammaproteobacteria;Enterobacteriales;Enterobacteriaceae;Tatumella;Tatumella_punctata	97.07	239	8e-116
denovo2176	Singleton	1	0	0	0	0	1	0	JN175342.1.1527_Bacteria;Proteobacteria;Gammaproteobacteria;Enterobacteriales;Enterobacteriaceae;Tatumella;Tatumella_punctata	96.44	253	2e-119
denovo2178	Singleton	1	1	0	0	0	0	0	JQ033749.1.1492_Bacteria;Proteobacteria;Gammaproteobacteria;Chromatiales;Ectothiorhodospiraceae;Thioalkalispira;uncultured_gamma_proteobacterium	94.86	253	8e-110
denovo2179	Singleton	1	0	0	1	0	0	0	JN175342.1.1527_Bacteria;Proteobacteria;Gammaproteobacteria;Enterobacteriales;Enterobacteriaceae;Tatumella;Tatumella_punctata	93.6	250	7e-101
denovo2180	Singleton	1	0	0	1	0	0	0	GQ348627.1.1363_Bacteria;Proteobacteria;Deltaproteobacteria;Desulfobacterales;Nitrospinaceae;Nitrospina;uncultured_delta_proteobacterium	96.84	253	9e-122
denovo2181	Singleton	1	0	1	0	0	0	0	FJ712469.1.1529_Bacteria;Proteobacteria;Deltaproteobacteria;Desulfobacterales;Desulfobacteraceae;SEEP-SRB1;uncultured_bacterium	94.47	253	2e-107
denovo2183	Singleton	1	0	0	0	0	1	0	HQ407281.1.1483_Bacteria;Proteobacteria;Gammaproteobacteria;Pasteurellales;Pasteurellaceae;Orbus;Cronobacter_sp._C106	100	253	7e-141
denovo2184	Singleton	1	0	0	0	1	0	0	JN175342.1.1527_Bacteria;Proteobacteria;Gammaproteobacteria;Enterobacteriales;Enterobacteriaceae;Tatumella;Tatumella_punctata	95.65	253	1e-114
denovo2185	Singleton	1	1	0	0	0	0	0	JF703600.1.1510_Bacteria;Proteobacteria;Gammaproteobacteria;Enterobacteriales;Enterobacteriaceae;Enterobacter;uncultured_Enterobacter_sp.	95.26	253	3e-112
denovo2186	Singleton	1	0	0	1	0	0	0	AM491592.1.1399_Bacteria;Proteobacteria;Gammaproteobacteria;Chromatiales;Chromatiaceae;Thiohalocapsa;Thiohalocapsa_marina	93.68	253	1e-102
denovo2187	Singleton	1	0	1	0	0	0	0	JN175342.1.1527_Bacteria;Proteobacteria;Gammaproteobacteria;Enterobacteriales;Enterobacteriaceae;Tatumella;Tatumella_punctata	96	250	3e-115
denovo2188	Singleton	1	1	0	0	0	0	0	FM211774.1.1516_Bacteria;Proteobacteria;Deltaproteobacteria;Desulfobacterales;Desulfobulbaceae;Desulfobulbus;uncultured_gamma_proteobacterium	96.84	253	9e-122
denovo2189	Singleton	1	1	0	0	0	0	0	JN175342.1.1527_Bacteria;Proteobacteria;Gammaproteobacteria;Enterobacteriales;Enterobacteriaceae;Tatumella;Tatumella_punctata	92.4	250	1e-93
denovo2190	Singleton	1	1	0	0	0	0	0	FJ404760.1.1489_Bacteria;Proteobacteria;Gammaproteobacteria;Enterobacteriales;Enterobacteriaceae;Enterobacter;Mangrovibacter_sp._WG-1	94.86	253	8e-110
denovo2191	Singleton	1	0	0	0	0	1	0	FJ404760.1.1489_Bacteria;Proteobacteria;Gammaproteobacteria;Enterobacteriales;Enterobacteriaceae;Enterobacter;Mangrovibacter_sp._WG-1	94.07	253	5e-105
denovo2192	Singleton	1	0	0	1	0	0	0	GU302437.1.1528_Bacteria;Proteobacteria;Deltaproteobacteria;Desulfobacterales;Desulfobacteraceae;Desulfobacterium;uncultured_bacterium	92.89	253	7e-98
denovo2193	Singleton	1	1	0	0	0	0	0	JN175342.1.1527_Bacteria;Proteobacteria;Gammaproteobacteria;Enterobacteriales;Enterobacteriaceae;Tatumella;Tatumella_punctata	95.65	253	1e-114
denovo2194	Singleton	1	1	0	0	0	0	0	AY726944.1.1213_Bacteria;Proteobacteria;Gammaproteobacteria;Alteromonadales;Colwelliaceae;Colwellia;uncultured_gamma_proteobacterium	96.05	253	5e-117
denovo2195	Singleton	1	0	0	0	1	0	0	FN429775.1.1516_Bacteria;Proteobacteria;Deltaproteobacteria;Desulfobacterales;Desulfobulbaceae;Desulfocapsa;uncultured_delta_proteobacterium	96.05	253	5e-117
denovo2197	Singleton	1	0	0	0	1	0	0	JN175342.1.1527_Bacteria;Proteobacteria;Gammaproteobacteria;Enterobacteriales;Enterobacteriaceae;Tatumella;Tatumella_punctata	93.68	253	1e-102
denovo2198	Singleton	1	0	0	0	1	0	0	JN175342.1.1527_Bacteria;Proteobacteria;Gammaproteobacteria;Enterobacteriales;Enterobacteriaceae;Tatumella;Tatumella_punctata	94.07	253	5e-105
denovo2200	Singleton	1	0	0	0	0	1	0	JN175342.1.1527_Bacteria;Proteobacteria;Gammaproteobacteria;Enterobacteriales;Enterobacteriaceae;Tatumella;Tatumella_punctata	96.8	250	6e-120
denovo2202	Singleton	1	0	0	0	0	1	0	AF388388.1.1514_Bacteria;Proteobacteria;Gammaproteobacteria;Vibrionales;Vibrionaceae;Vibrio;Vibrio_parahaemolyticus	96.44	253	2e-119
denovo2203	Singleton	1	0	0	1	0	0	0	JN194132.1.1320_Bacteria;Proteobacteria;Gammaproteobacteria;Enterobacteriales;Enterobacteriaceae;Pantoea;bacterium_MPB_JP_b	94.8	250	5e-108
denovo2204	Singleton	1	0	0	1	0	0	0	GQ261812.1.1404_Bacteria;Proteobacteria;Epsilonproteobacteria;Campylobacterales;Helicobacteraceae;Sulfurimonas;uncultured_epsilon_proteobacterium	92.09	253	4e-93
denovo2205	Singleton	1	0	0	0	0	0	1	JN175342.1.1527_Bacteria;Proteobacteria;Gammaproteobacteria;Enterobacteriales;Enterobacteriaceae;Tatumella;Tatumella_punctata	96.84	253	9e-122
denovo2208	Singleton	1	0	1	0	0	0	0	EF509905.1.1477_Bacteria;Proteobacteria;Gammaproteobacteria;Enterobacteriales;Enterobacteriaceae;Klebsiella;uncultured_bacterium	97.23	253	4e-124
denovo2209	Singleton	1	0	1	0	0	0	0	JN175342.1.1527_Bacteria;Proteobacteria;Gammaproteobacteria;Enterobacteriales;Enterobacteriaceae;Tatumella;Tatumella_punctata	96.84	253	9e-122
denovo221	Singleton	1	0	1	0	0	0	0	JN175342.1.1527_Bacteria;Proteobacteria;Gammaproteobacteria;Enterobacteriales;Enterobacteriaceae;Tatumella;Tatumella_punctata	96.84	253	9e-122
denovo2211	Singleton	1	1	0	0	0	0	0	JN175342.1.1527_Bacteria;Proteobacteria;Gammaproteobacteria;Enterobacteriales;Enterobacteriaceae;Tatumella;Tatumella_punctata	96.44	253	2e-119
denovo2212	Singleton	1	0	0	0	1	0	0	JN175342.1.1527_Bacteria;Proteobacteria;Gammaproteobacteria;Enterobacteriales;Enterobacteriaceae;Tatumella;Tatumella_punctata	94.86	253	8e-110
denovo2213	Singleton	1	0	0	0	0	1	0	HM556940.1.1327_Bacteria;Proteobacteria;Gammaproteobacteria;Enterobacteriales;Enterobacteriaceae;Escherichia-Shigella;uncultured_bacterium	97.63	253	2e-126
denovo2214	Singleton	1	0	0	1	0	0	0	HQ190518.1.1533_Bacteria;Proteobacteria;Deltaproteobacteria;Desulfobacterales;Desulfobacteraceae;uncultured;uncultured_bacterium	96.03	252	2e-116
denovo2215	Singleton	1	0	0	0	0	0	1	GQ041789.1.1252_Bacteria;Firmicutes;Clostridia;Clostridiales;Family_XI_Incertae_Sedis;Anaerococcus;uncultured_bacterium	100	252	3e-140
denovo2217	Singleton	1	0	1	0	0	0	0	JN175342.1.1527_Bacteria;Proteobacteria;Gammaproteobacteria;Enterobacteriales;Enterobacteriaceae;Tatumella;Tatumella_punctata	96.84	253	9e-122
denovo222	Singleton	1	0	0	0	0	1	0	JF706534.1.1396_Bacteria;Proteobacteria;Gammaproteobacteria;Enterobacteriales;Enterobacteriaceae;Erwinia;Erwinia_rhapontici	95.65	253	1e-114
denovo2221	Singleton	1	0	0	0	0	0	1	JN175342.1.1527_Bacteria;Proteobacteria;Gammaproteobacteria;Enterobacteriales;Enterobacteriaceae;Tatumella;Tatumella_punctata	91.6	250	6e-89
denovo2222	Singleton	1	0	1	0	0	0	0	JN035217.1.1416_Bacteria;Proteobacteria;Gammaproteobacteria;Aeromonadales;Aeromonadaceae;Aeromonas;bacterium_SUTW_73	93.68	253	1e-102
denovo2223	Singleton	1	0	1	0	0	0	0	JN175342.1.1527_Bacteria;Proteobacteria;Gammaproteobacteria;Enterobacteriales;Enterobacteriaceae;Tatumella;Tatumella_punctata	96.84	253	9e-122
denovo2224	Singleton	1	1	0	0	0	0	0	JN194132.1.1320_Bacteria;Proteobacteria;Gammaproteobacteria;Enterobacteriales;Enterobacteriaceae;Pantoea;bacterium_MPB_JP_b	90.51	253	1e-83
denovo2225	Singleton	1	0	0	0	1	0	0	JN547817.1.1420_Bacteria;Cyanobacteria;Chloroplast;Jatropha_curcas	96.84	253	9e-122
denovo2226	Singleton	1	0	1	0	0	0	0	JF920313.1.1360_Bacteria;Proteobacteria;Gammaproteobacteria;Enterobacteriales;Enterobacteriaceae;Raoultella;Enterobacter;uncultured_bacterium	93.68	253	1e-102
denovo2227	Singleton	1	0	1	0	0	0	0	JN977206.1.1534_Bacteria;Proteobacteria;Deltaproteobacteria;Desulfobacterales;Desulfobulbaceae;uncultured;uncultured_bacterium	94.07	253	5e-105
denovo223	Singleton	1	1	0	0	0	0	0	JN175342.1.1527_Bacteria;Proteobacteria;Gammaproteobacteria;Enterobacteriales;Enterobacteriaceae;Tatumella;Tatumella_punctata	96.84	253	2e-116
denovo2230	Singleton	1	0	0	0	0	1	0	HM556457.1.1373_Bacteria;Proteobacteria;Gammaproteobacteria;Enterobacteriales;Enterobacteriaceae;Tatumella;uncultured_bacterium	97.63	253	2e-126
denovo2231	Singleton	1	0	1	0	0	0	0	JN175342.1.1527_Bacteria;Proteobacteria;Gammaproteobacteria;Enterobacteriales;Enterobacteriaceae;Tatumella;Tatumella_punctata	94.07	253	5e-105
denovo2233	Singleton	1	0	0	0	0	0	1	JN175342.1.1527_Bacteria;Proteobacteria;Gammaproteobacteria;Enterobacteriales;Enterobacteriaceae;Tatumella;Tatumella_punctata	94.86	253	8e-110
denovo2237	Singleton	1	0	0	0	1	0	0	JF747621.1.1521_Bacteria;Proteobacteria;Deltaproteobacteria;Desulfuromonadales;Desulfuromonadaceae;Desulfuromusa;uncultured_bacterium	93.68	253	1e-102
denovo2239	Singleton	1	0	0	0	1	0	0	X80775.1.1448_Bacteria;Proteobacteria;Alphaproteobacteria;Rhodospirillales;Acetobacteraceae;Gluconobacter;Gluconobacter_cerinus	96.44	253	2e-119
denovo224	Singleton	1	0	0	0	0	0	1	JN175342.1.1527_Bacteria;Proteobacteria;Gammaproteobacteria;Enterobacteriales;Enterobacteriaceae;Tatumella;Tatumella_punctata	96.44	253	2e-119
denovo2240	Singleton	1	1	0	0	0	0	0	JN175342.1.1527_Bacteria;Proteobacteria;Gammaproteobacteria;Enterobacteriales;Enterobacteriaceae;Tatumella;Tatumella_punctata	96.05	253	5e-117
denovo2241	Singleton	1	0	0	0	1	0	0	JN013932.1.1509_Bacteria;Proteobacteria;Gammaproteobacteria;Enterobacteriales;Enterobacteriaceae;Enterobacter;uncultured_bacterium	94.86	253	8e-110
denovo2242	Singleton	1	0	0	0	0	1	0	JF417872.1.1512_Bacteria;Firmicutes;Bacilli;Bacillales;Planococcaceae;Planomicrobium;uncultured_bacterium	97.23	253	4e-124
denovo2243	Singleton	1	0	0	0	1	0	0	X80775.1.1448_Bacteria;Proteobacteria;Alphaproteobacteria;Rhodospirillales;Acetobacteraceae;Gluconobacter;Gluconobacter_cerinus	97.2	250	2e-122
denovo2244	Singleton	1	0	0	1	0	0	0	U20275.1.1508_Bacteria;Proteobacteria;Gammaproteobacteria;Enterobacteriales;Enterobacteriaceae;Serratia;uncultured_bacterium	88.14	253	3e-57
denovo2245	Singleton	1	1	0	0	0	0	0	JN175342.1.1527_Bacteria;Proteobacteria;Gammaproteobacteria;Enterobacteriales;Enterobacteriaceae;Tatumella;Tatumella_punctata	93.28	253	3e-100
denovo2246	Singleton	1	1	0	0	0	0	0	JN175342.1.1527_Bacteria;Proteobacteria;Gammaproteobacteria;Enterobacteriales;Enterobacteriaceae;Tatumella;Tatumella_punctata	96.44	253	2e-119
denovo2247	Singleton	1	0	0	1	0	0	0	GU451511.1.1214_Bacteria;Proteobacteria;Alphaproteobacteria;Sphingomonadales;Sphingomonadaceae;Sphingopyxis;uncultured_bacterium	98.42	253	3e-131
denovo2248	Singleton	1	0	0	0	1	0	0	GU118708.1.1458_Bacteria;Proteobacteria;Gammaproteobacteria;HOC36;uncultured_bacterium	96.86	255	3e-118
denovo225	Singleton	1	0	0	0	1	0	0	HM558240.1.1372_Bacteria;Proteobacteria;Gammaproteobacteria;Enterobacteriales;Enterobacteriaceae;Tatumella;uncultured_bacterium	96.44	253	2e-119
denovo2250	Singleton	1	0	1	0	0	0	0	JN175342.1.1527_Bacteria;Proteobacteria;Gammaproteobacteria;Enterobacteriales;Enterobacteriaceae;Tatumella;Tatumella_punctata	96.44	253	2e-119
denovo2251	Singleton	1	0	0	0	1	0	0	JN175342.1.1527_Bacteria;Proteobacteria;Gammaproteobacteria;Enterobacteriales;Enterobacteriaceae;Tatumella;Tatumella_punctata	96.84	253	9e-122
denovo2252	Singleton	1	0	0	0	1	0	0	X80775.1.1448_Bacteria;Proteobacteria;Alphaproteobacteria;Rhodospirillales;Acetobacteraceae;Gluconobacter;Gluconobacter_cerinus	97.2	250	2e-122
denovo2253	Singleton	1	1	0	0	0	0	0	AB021400.1.1522_Bacteria;Proteobacteria;Gammaproteobacteria;Enterobacteriales;Enterobacteriaceae;Tatumella;Pseudomonas_flectens	94.47	253	2e-107
denovo2254	Singleton	1	0	1	0	0	0	0	JN175342.1.1527_Bacteria;Proteobacteria;Gammaproteobacteria;Enterobacteriales;Enterobacteriaceae;Tatumella;Tatumella_punctata	96.83	252	4e-121
denovo2255	Singleton	1	0	0	0	0	0	1	JN175342.1.1527_Bacteria;Proteobacteria;Gammaproteobacteria;Enterobacteriales;Enterobacteriaceae;Tatumella;Tatumella_punctata	96.84	253	9e-122
denovo2256	Singleton	1	0	0	0	0	0	1	HM556852.1.1374_Bacteria;Proteobacteria;Gammaproteobacteria;Enterobacteriales;Enterobacteriaceae;Tatumella;uncultured_bacterium	97.23	253	4e-124
denovo2257	Singleton	1	0	0	0	1	0	0	DQ008711.1.2066_Bacteria;Proteobacteria;Alphaproteobacteria;Rickettsiales;mitochondria;Cinnamomum_camphora_(camphor_tree)	99.58	240	1e-130
denovo2258	Singleton	1	1	0	0	0	0	0	JQ318909.1.1370_Bacteria;Proteobacteria;Gammaproteobacteria;Enterobacteriales;Enterobacteriaceae;Erwinia;uncultured_Erwinia_sp.	93.68	253	1e-102
denovo2259	Singleton	1	0	0	0	1	0	0	X80775.1.1448_Bacteria;Proteobacteria;Alphaproteobacteria;Rhodospirillales;Acetobacteraceae;Gluconobacter;Gluconobacter_cerinus	95.26	253	3e-112
denovo226	Singleton	1	0	1	0	0	0	0	EF515224.1.1409_Bacteria;Proteobacteria;Gammaproteobacteria;Aeromonadales;Aeromonadaceae;Aeromonas;uncultured_bacterium	92.49	253	2e-95
denovo2260	Singleton	1	0	0	0	0	1	0	FJ535299.1.1362_Bacteria;Proteobacteria;Gammaproteobacteria;BD7-8_marine_group;uncultured_bacterium	94.47	253	2e-107
denovo2261	Singleton	1	0	1	0	0	0	0	JF706534.1.1396_Bacteria;Proteobacteria;Gammaproteobacteria;Enterobacteriales;Enterobacteriaceae;Erwinia;Erwinia_rhapontici	97.23	253	4e-124
denovo2262	Singleton	1	0	0	0	0	1	0	JN175342.1.1527_Bacteria;Proteobacteria;Gammaproteobacteria;Enterobacteriales;Enterobacteriaceae;Tatumella;Tatumella_punctata	96.84	253	9e-122
denovo2263	Singleton	1	0	0	0	0	0	1	HQ787611.1.1463_Bacteria;Proteobacteria;Gammaproteobacteria;Enterobacteriales;Enterobacteriaceae;Enterobacter;uncultured_organism	97.63	253	2e-126
denovo2265	Singleton	1	0	1	0	0	0	0	JF946790.1.1385_Bacteria;Proteobacteria;Gammaproteobacteria;Enterobacteriales;Enterobacteriaceae;Cedecea;Cedecea_sp._A415	97.23	253	4e-124
denovo2266	Singleton	1	1	0	0	0	0	0	JN175342.1.1527_Bacteria;Proteobacteria;Gammaproteobacteria;Enterobacteriales;Enterobacteriaceae;Tatumella;Tatumella_punctata	95.65	253	1e-114
denovo2267	Singleton	1	0	1	0	0	0	0	EU289465.1.1506_Bacteria;Proteobacteria;Gammaproteobacteria;Enterobacteriales;Enterobacteriaceae;Trabulsiella;uncultured_bacterium	92.49	253	2e-95
denovo2268	Singleton	1	0	1	0	0	0	0	EF509857.1.1417_Bacteria;Proteobacteria;Gammaproteobacteria;Enterobacteriales;Enterobacteriaceae;Klebsiella;uncultured_bacterium	94.79	192	1e-80
denovo2269	Singleton	1	0	1	0	0	0	0	JN175342.1.1527_Bacteria;Proteobacteria;Gammaproteobacteria;Enterobacteriales;Enterobacteriaceae;Tatumella;Tatumella_punctata	95.65	253	1e-114
denovo227	Singleton	1	1	0	0	0	0	0	JN990099.1.1503_Bacteria;Proteobacteria;Gammaproteobacteria;Enterobacteriales;Enterobacteriaceae;Enterobacter;uncultured_bacterium	96.44	253	2e-119
denovo2271	Singleton	1	0	0	0	0	1	0	JF344193.1.1518_Bacteria;Acidobacteria;Holophagae;NKB17;uncultured_Acidobacteria_bacterium	97.63	253	2e-126
denovo2272	Singleton	1	0	1	0	0	0	0	JN990099.1.1503_Bacteria;Proteobacteria;Gammaproteobacteria;Enterobacteriales;Enterobacteriaceae;Enterobacter;uncultured_bacterium	95.26	253	3e-112
denovo2273	Singleton	1	1	0	0	0	0	0	JN175342.1.1527_Bacteria;Proteobacteria;Gammaproteobacteria;Enterobacteriales;Enterobacteriaceae;Tatumella;Tatumella_punctata	96.05	253	5e-117
denovo2276	Singleton	1	0	1	0	0	0	0	JN497208.1.1366_Bacteria;Proteobacteria;Deltaproteobacteria;Myxococcales;Nannocystineae;uncultured;uncultured_organism	94.86	253	8e-110
denovo2277	Singleton	1	0	0	0	1	0	0	JF706534.1.1396_Bacteria;Proteobacteria;Gammaproteobacteria;Enterobacteriales;Enterobacteriaceae;Erwinia;Erwinia_rhapontici	96.44	253	2e-119
denovo2278	Singleton	1	0	0	0	1	0	0	JF119129.1.1361_Bacteria;Proteobacteria;Gammaproteobacteria;Enterobacteriales;Enterobacteriaceae;Klebsiella;uncultured_bacterium	94.8	250	5e-108
denovo2279	Singleton	1	0	0	0	1	0	0	HM556852.1.1374_Bacteria;Proteobacteria;Gammaproteobacteria;Enterobacteriales;Enterobacteriaceae;Tatumella;uncultured_bacterium	97.6	250	9e-125
denovo228	Singleton	1	0	0	0	1	0	0	X80775.1.1448_Bacteria;Proteobacteria;Alphaproteobacteria;Rhodospirillales;Acetobacteraceae;Gluconobacter;Gluconobacter_cerinus	97.2	250	2e-122
denovo2280	Singleton	1	0	0	0	0	1	0	HM556852.1.1374_Bacteria;Proteobacteria;Gammaproteobacteria;Enterobacteriales;Enterobacteriaceae;Tatumella;uncultured_bacterium	94.86	253	8e-110
denovo2281	Singleton	1	1	0	0	0	0	0	GU363029.1.1432_Bacteria;Candidate_division_WS3;uncultured_bacterium	93.88	245	3e-100
denovo2282	Singleton	1	1	0	0	0	0	0	JN194132.1.1320_Bacteria;Proteobacteria;Gammaproteobacteria;Enterobacteriales;Enterobacteriaceae;Pantoea;bacterium_MPB_JP_b	95.65	253	1e-114
denovo2283	Singleton	1	1	0	0	0	0	0	JN672630.1.1465_Bacteria;Proteobacteria;Gammaproteobacteria;BD7-8_marine_group;uncultured_gamma_proteobacterium	95.65	253	1e-114
denovo2285	Singleton	1	0	1	0	0	0	0	JN175342.1.1527_Bacteria;Proteobacteria;Gammaproteobacteria;Enterobacteriales;Enterobacteriaceae;Tatumella;Tatumella_punctata	95.26	253	3e-112
denovo2287	Singleton	1	1	0	0	0	0	0	HM557114.1.1377_Bacteria;Proteobacteria;Gammaproteobacteria;Enterobacteriales;Enterobacteriaceae;Enterobacter;uncultured_bacterium	93.28	253	3e-100
denovo2288	Singleton	1	1	0	0	0	0	0	EF509905.1.1477_Bacteria;Proteobacteria;Gammaproteobacteria;Enterobacteriales;Enterobacteriaceae;Klebsiella;uncultured_bacterium	93.68	253	1e-102
denovo2289	Singleton	1	1	0	0	0	0	0	HM558240.1.1372_Bacteria;Proteobacteria;Gammaproteobacteria;Enterobacteriales;Enterobacteriaceae;Tatumella;uncultured_bacterium	97.19	249	9e-122
denovo2290	Singleton	1	1	0	0	0	0	0	HM556852.1.1374_Bacteria;Proteobacteria;Gammaproteobacteria;Enterobacteriales;Enterobacteriaceae;Tatumella;uncultured_bacterium	96.84	253	9e-122
denovo2293	Singleton	1	0	0	0	1	0	0	FJ712469.1.1529_Bacteria;Proteobacteria;Deltaproteobacteria;Desulfobacterales;Desulfobacteraceae;SEEP-SRB1;uncultured_bacterium	94.07	253	5e-105
denovo2294	Singleton	1	0	0	0	0	1	0	JN175342.1.1527_Bacteria;Proteobacteria;Gammaproteobacteria;Enterobacteriales;Enterobacteriaceae;Tatumella;Tatumella_punctata	95.65	253	1e-114
denovo2295	Singleton	1	1	0	0	0	0	0	EF509905.1.1477_Bacteria;Proteobacteria;Gammaproteobacteria;Enterobacteriales;Enterobacteriaceae;Klebsiella;uncultured_bacterium	94.07	253	5e-105
denovo2296	Singleton	1	0	1	0	0	0	0	JN977155.1.1529_Bacteria;Proteobacteria;Gammaproteobacteria;Chromatiales;Granulosicoccaceae;Granulosicoccus;uncultured_bacterium	95.65	253	1e-114
denovo2297	Singleton	1	0	0	0	0	0	1	JN175342.1.1527_Bacteria;Proteobacteria;Gammaproteobacteria;Enterobacteriales;Enterobacteriaceae;Tatumella;Tatumella_punctata	96.05	253	5e-117
denovo2298	Singleton	1	1	0	0	0	0	0	JN175342.1.1527_Bacteria;Proteobacteria;Gammaproteobacteria;Enterobacteriales;Enterobacteriaceae;Tatumella;Tatumella_punctata	96	250	3e-115
denovo2299	Singleton	1	0	1	0	0	0	0	JQ315905.1.1499_Bacteria;Proteobacteria;Gammaproteobacteria;Enterobacteriales;Enterobacteriaceae;Salmonella;Salmonella_enterica	97.11	242	1e-117
denovo23	Singleton	1	0	1	0	0	0	0	JN175342.1.1527_Bacteria;Proteobacteria;Gammaproteobacteria;Enterobacteriales;Enterobacteriaceae;Tatumella;Tatumella_punctata	96.44	253	2e-119
denovo230	Singleton	1	0	0	0	1	0	0	JN175342.1.1527_Bacteria;Proteobacteria;Gammaproteobacteria;Enterobacteriales;Enterobacteriaceae;Tatumella;Tatumella_punctata	93.28	253	3e-100
denovo2300	Singleton	1	0	1	0	0	0	0	EU491181.1.1474_Bacteria;Proteobacteria;Deltaproteobacteria;SAR324_clade(Marine_group_B);uncultured_bacterium	93.09	246	4e-96
denovo2301	Singleton	1	0	1	0	0	0	0	JF706534.1.1396_Bacteria;Proteobacteria;Gammaproteobacteria;Enterobacteriales;Enterobacteriaceae;Erwinia;Erwinia_rhapontici	95.65	253	1e-114
denovo2302	Singleton	1	0	1	0	0	0	0	JN175342.1.1527_Bacteria;Proteobacteria;Gammaproteobacteria;Enterobacteriales;Enterobacteriaceae;Tatumella;Tatumella_punctata	95.26	253	3e-112
denovo2303	Singleton	1	0	1	0	0	0	0	JN175342.1.1527_Bacteria;Proteobacteria;Gammaproteobacteria;Enterobacteriales;Enterobacteriaceae;Tatumella;Tatumella_punctata	95.65	253	1e-114
denovo2304	Singleton	1	0	0	0	0	1	0	JN175342.1.1527_Bacteria;Proteobacteria;Gammaproteobacteria;Enterobacteriales;Enterobacteriaceae;Tatumella;Tatumella_punctata	96.05	253	5e-117
denovo2305	Singleton	1	1	0	0	0	0	0	FJ404760.1.1489_Bacteria;Proteobacteria;Gammaproteobacteria;Enterobacteriales;Enterobacteriaceae;Enterobacter;Mangrovibacter_sp._WG-1	93.27	223	3e-87
denovo2306	Singleton	1	1	0	0	0	0	0	JN175342.1.1527_Bacteria;Proteobacteria;Gammaproteobacteria;Enterobacteriales;Enterobacteriaceae;Tatumella;Tatumella_punctata	96.84	253	9e-122
denovo2307	Singleton	1	1	0	0	0	0	0	JN175342.1.1527_Bacteria;Proteobacteria;Gammaproteobacteria;Enterobacteriales;Enterobacteriaceae;Tatumella;Tatumella_punctata	96.84	253	9e-122
denovo2308	Singleton	1	1	0	0	0	0	0	JN175342.1.1527_Bacteria;Proteobacteria;Gammaproteobacteria;Enterobacteriales;Enterobacteriaceae;Tatumella;Tatumella_punctata	96.44	253	2e-119
denovo2309	Singleton	1	0	1	0	0	0	0	FR870447.1.1508_Bacteria;Proteobacteria;Gammaproteobacteria;Enterobacteriales;Enterobacteriaceae;Pantoea;Erwinia_toletana	94.86	253	8e-110
denovo231	Singleton	1	0	0	0	0	0	1	JN175342.1.1527_Bacteria;Proteobacteria;Gammaproteobacteria;Enterobacteriales;Enterobacteriaceae;Tatumella;Tatumella_punctata	94.86	253	8e-110
denovo2310	Singleton	1	1	0	0	0	0	0	X93216.1.1495_Bacteria;Proteobacteria;Gammaproteobacteria;Enterobacteriales;Enterobacteriaceae;Raoultella;Raoultella_planticola	93.28	253	3e-100
denovo2311	Singleton	1	0	0	0	0	0	1	JN175342.1.1527_Bacteria;Proteobacteria;Gammaproteobacteria;Enterobacteriales;Enterobacteriaceae;Tatumella;Tatumella_punctata	95.65	253	1e-114
denovo2312	Singleton	1	0	0	0	1	0	0	JN990099.1.1503_Bacteria;Proteobacteria;Gammaproteobacteria;Enterobacteriales;Enterobacteriaceae;Enterobacter;uncultured_bacterium	96.84	253	9e-122
denovo2313	Singleton	1	0	0	1	0	0	0	JN194132.1.1320_Bacteria;Proteobacteria;Gammaproteobacteria;Enterobacteriales;Enterobacteriaceae;Pantoea;bacterium_MPB_JP_b	93.28	253	3e-100
denovo2317	Singleton	1	0	1	0	0	0	0	FJ404760.1.1489_Bacteria;Proteobacteria;Gammaproteobacteria;Enterobacteriales;Enterobacteriaceae;Enterobacter;Mangrovibacter_sp._WG-1	94.27	192	2e-78
denovo232	Singleton	1	0	1	0	0	0	0	HM558240.1.1372_Bacteria;Proteobacteria;Gammaproteobacteria;Enterobacteriales;Enterobacteriaceae;Tatumella;uncultured_bacterium	95.65	253	1e-114
denovo2320	Singleton	1	0	0	1	0	0	0	FJ202841.1.1454_Bacteria;Planctomycetes;Phycisphaerae;Phycisphaerales;Phycisphaeraceae;Phycisphaera;uncultured_bacterium	97.23	253	4e-124
denovo2321	Singleton	1	0	1	0	0	0	0	EU592369.1.1489_Bacteria;Proteobacteria;Gammaproteobacteria;Chromatiales;Chromatiaceae;Thiohalocapsa;uncultured_bacterium	93.68	253	1e-102
denovo2322	Singleton	1	0	0	0	0	0	1	JN175342.1.1527_Bacteria;Proteobacteria;Gammaproteobacteria;Enterobacteriales;Enterobacteriaceae;Tatumella;Tatumella_punctata	94.47	253	2e-107
denovo2324	Singleton	1	0	1	0	0	0	0	JN175342.1.1527_Bacteria;Proteobacteria;Gammaproteobacteria;Enterobacteriales;Enterobacteriaceae;Tatumella;Tatumella_punctata	94.47	253	2e-107
denovo2326	Singleton	1	0	1	0	0	0	0	JF706534.1.1396_Bacteria;Proteobacteria;Gammaproteobacteria;Enterobacteriales;Enterobacteriaceae;Erwinia;Erwinia_rhapontici	96.44	253	2e-119
denovo2327	Singleton	1	0	1	0	0	0	0	JF825446.1.1472_Bacteria;Proteobacteria;Gammaproteobacteria;Alteromonadales;Colwelliaceae;Colwellia;Colwellia_sp._STAB604	92.49	253	2e-95
denovo2328	Singleton	1	0	1	0	0	0	0	JN175342.1.1527_Bacteria;Proteobacteria;Gammaproteobacteria;Enterobacteriales;Enterobacteriaceae;Tatumella;Tatumella_punctata	95.98	249	1e-114
denovo2329	Singleton	1	0	0	0	0	0	1	AB178412.1.1409_Bacteria;Proteobacteria;Alphaproteobacteria;Rhodospirillales;Acetobacteraceae;Gluconobacter;Gluconobacter_albidus	96.44	253	2e-119
denovo233	Singleton	1	0	1	0	0	0	0	FJ404760.1.1489_Bacteria;Proteobacteria;Gammaproteobacteria;Enterobacteriales;Enterobacteriaceae;Enterobacter;Mangrovibacter_sp._WG-1	94.8	250	5e-108
denovo2333	Singleton	1	1	0	0	0	0	0	JN175342.1.1527_Bacteria;Proteobacteria;Gammaproteobacteria;Enterobacteriales;Enterobacteriaceae;Tatumella;Tatumella_punctata	96.84	253	9e-122
denovo2335	Singleton	1	0	0	0	0	0	1	JF268394.1.1496_Bacteria;Proteobacteria;Gammaproteobacteria;Thiotrichales;Piscirickettsiaceae;uncultured;uncultured_bacterium	93.68	253	1e-102
denovo2336	Singleton	1	0	0	0	0	0	1	HM558240.1.1372_Bacteria;Proteobacteria;Gammaproteobacteria;Enterobacteriales;Enterobacteriaceae;Tatumella;uncultured_bacterium	97.6	250	9e-125
denovo2337	Singleton	1	1	0	0	0	0	0	FR683412.1.1495_Bacteria;Proteobacteria;Gammaproteobacteria;Oceanospirillales;SAR86_clade;uncultured_marine_bacterium	95.65	253	1e-114
denovo2338	Singleton	1	1	0	0	0	0	0	GQ402778.1.1461_Bacteria;Proteobacteria;Betaproteobacteria;Nitrosomonadales;Gallionellaceae;Candidatus_Nitrotoga;uncultured_bacterium	93.68	253	1e-102
denovo2339	Singleton	1	0	0	0	0	1	0	JN990099.1.1503_Bacteria;Proteobacteria;Gammaproteobacteria;Enterobacteriales;Enterobacteriaceae;Enterobacter;uncultured_bacterium	94.86	253	8e-110
denovo234	Singleton	1	0	0	0	1	0	0	HQ191033.1.1494_Bacteria;Proteobacteria;Gammaproteobacteria;Chromatiales;Ectothiorhodospiraceae;Acidiferrobacter;uncultured_sediment_bacterium	96.33	218	6e-101
denovo2340	Singleton	1	0	0	0	0	0	1	HQ787611.1.1463_Bacteria;Proteobacteria;Gammaproteobacteria;Enterobacteriales;Enterobacteriaceae;Enterobacter;uncultured_organism	93.2	250	2e-98
denovo2341	Singleton	1	0	1	0	0	0	0	JN990093.1.1541_Bacteria;Proteobacteria;Gammaproteobacteria;Enterobacteriales;Enterobacteriaceae;Enterobacter;uncultured_Pantoea_sp.	97.23	253	4e-124
denovo2342	Singleton	1	0	1	0	0	0	0	JN194132.1.1320_Bacteria;Proteobacteria;Gammaproteobacteria;Enterobacteriales;Enterobacteriaceae;Pantoea;bacterium_MPB_JP_b	95.26	253	3e-112
denovo2343	Singleton	1	0	0	0	0	1	0	FJ404760.1.1489_Bacteria;Proteobacteria;Gammaproteobacteria;Enterobacteriales;Enterobacteriaceae;Enterobacter;Mangrovibacter_sp._WG-1	95.26	253	3e-112
denovo2344	Singleton	1	0	0	0	0	1	0	JN175342.1.1527_Bacteria;Proteobacteria;Gammaproteobacteria;Enterobacteriales;Enterobacteriaceae;Tatumella;Tatumella_punctata	96.84	253	9e-122
denovo2345	Singleton	1	0	0	0	0	0	1	JQ033749.1.1492_Bacteria;Proteobacteria;Gammaproteobacteria;Chromatiales;Ectothiorhodospiraceae;Thioalkalispira;uncultured_gamma_proteobacterium	94.86	253	8e-110
denovo2346	Singleton	1	1	0	0	0	0	0	JN175342.1.1527_Bacteria;Proteobacteria;Gammaproteobacteria;Enterobacteriales;Enterobacteriaceae;Tatumella;Tatumella_punctata	95.65	253	1e-114
denovo2347	Singleton	1	1	0	0	0	0	0	EU488600.1.1510_Bacteria;Proteobacteria;Gammaproteobacteria;Order_Incertae_Sedis;Family_Incertae_Sedis;Sedimenticola;uncultured_bacterium	96.84	253	9e-122
denovo2348	Singleton	1	0	0	0	0	0	1	JF186041.1.1361_Bacteria;Proteobacteria;Gammaproteobacteria;Enterobacteriales;Enterobacteriaceae;Enterobacter;uncultured_bacterium	96.05	253	5e-117
denovo2349	Singleton	1	0	0	0	1	0	0	JN175342.1.1527_Bacteria;Proteobacteria;Gammaproteobacteria;Enterobacteriales;Enterobacteriaceae;Tatumella;Tatumella_punctata	94.47	253	2e-107
denovo235	Singleton	1	0	0	0	0	1	0	EU048620.1.1499_Bacteria;Planctomycetes;Planctomycetacia;Brocadiales;Brocadiaceae;W4;uncultured_bacterium	90.53	243	5e-80
denovo2350	Singleton	1	0	1	0	0	0	0	HQ787611.1.1463_Bacteria;Proteobacteria;Gammaproteobacteria;Enterobacteriales;Enterobacteriaceae;Enterobacter;uncultured_organism	94.07	253	5e-105
denovo2352	Singleton	1	0	0	0	1	0	0	JF179655.1.1346_Bacteria;Actinobacteria;Acidimicrobiia;Acidimicrobiales;Iamiaceae;Iamia;uncultured_bacterium	100	254	2e-141
denovo2353	Singleton	1	0	1	0	0	0	0	JN175342.1.1527_Bacteria;Proteobacteria;Gammaproteobacteria;Enterobacteriales;Enterobacteriaceae;Tatumella;Tatumella_punctata	95.51	245	7e-110
denovo2354	Singleton	1	0	0	0	1	0	0	JN175342.1.1527_Bacteria;Proteobacteria;Gammaproteobacteria;Enterobacteriales;Enterobacteriaceae;Tatumella;Tatumella_punctata	95.65	253	1e-114
denovo2355	Singleton	1	1	0	0	0	0	0	EU289465.1.1506_Bacteria;Proteobacteria;Gammaproteobacteria;Enterobacteriales;Enterobacteriaceae;Trabulsiella;uncultured_bacterium	94.47	253	2e-107
denovo2357	Singleton	1	0	0	0	1	0	0	X80775.1.1448_Bacteria;Proteobacteria;Alphaproteobacteria;Rhodospirillales;Acetobacteraceae;Gluconobacter;Gluconobacter_cerinus	94.47	253	2e-107
denovo2358	Singleton	1	0	1	0	0	0	0	JF344268.1.1520_Bacteria;Proteobacteria;Deltaproteobacteria;Desulfobacterales;Desulfobacteraceae;Desulfobacula;uncultured_delta_proteobacterium	92.8	250	4e-96
denovo236	Singleton	1	0	0	0	0	1	0	JN175342.1.1527_Bacteria;Proteobacteria;Gammaproteobacteria;Enterobacteriales;Enterobacteriaceae;Tatumella;Tatumella_punctata	96.84	253	9e-122
denovo2360	Singleton	1	0	0	0	1	0	0	JN175342.1.1527_Bacteria;Proteobacteria;Gammaproteobacteria;Enterobacteriales;Enterobacteriaceae;Tatumella;Tatumella_punctata	95.26	253	3e-112
denovo2361	Singleton	1	1	0	0	0	0	0	HM556852.1.1374_Bacteria;Proteobacteria;Gammaproteobacteria;Enterobacteriales;Enterobacteriaceae;Tatumella;uncultured_bacterium	96.25	240	1e-111
denovo2363	Singleton	1	0	1	0	0	0	0	AF144693.1.1279_Bacteria;Proteobacteria;Epsilonproteobacteria;Campylobacterales;Campylobacteraceae;Arcobacter;oilfield_bacterium_'FWKO_B'	90.91	253	6e-86
denovo2365	Singleton	1	1	0	0	0	0	0	HQ191058.1.1498_Bacteria;Proteobacteria;Gammaproteobacteria;BD7-8_marine_group;uncultured_sediment_bacterium	95.79	214	3e-96
denovo2367	Singleton	1	0	0	0	0	1	0	HQ163166.1.1374_Bacteria;Proteobacteria;Gammaproteobacteria;Alteromonadales;Pseudoalteromonadaceae;uncultured;uncultured_gamma_proteobacterium	98.81	253	1e-133
denovo2368	Singleton	1	0	0	0	0	0	1	JN049601.1.1503_Bacteria;Proteobacteria;Gammaproteobacteria;Xanthomonadales;Xanthomonadaceae;Stenotrophomonas;Klebsiella_sp._Y6	96.84	253	9e-122
denovo2369	Singleton	1	1	0	0	0	0	0	JN175342.1.1527_Bacteria;Proteobacteria;Gammaproteobacteria;Enterobacteriales;Enterobacteriaceae;Tatumella;Tatumella_punctata	96.84	253	9e-122
denovo237	Singleton	1	0	1	0	0	0	0	JF344449.1.1521_Bacteria;Proteobacteria;Deltaproteobacteria;Desulfobacterales;Desulfobacteraceae;Sva0081_sediment_group;uncultured_delta_proteobacterium	92.89	253	7e-98
denovo2370	Singleton	1	0	1	0	0	0	0	JF710262.1.1491_Bacteria;Bacteroidetes;Sphingobacteriia;Sphingobacteriales;Chitinophagaceae;Chitinophaga;Chitinophaga_sp._YC7001	98.42	253	3e-131
denovo2371	Singleton	1	0	0	0	0	1	0	JF690979.1.1419_Bacteria;Proteobacteria;Gammaproteobacteria;Enterobacteriales;Enterobacteriaceae;Enterobacter;Enterobacter_ludwigii	96.84	253	9e-122
denovo2372	Singleton	1	0	0	0	0	1	0	JF690979.1.1419_Bacteria;Proteobacteria;Gammaproteobacteria;Enterobacteriales;Enterobacteriaceae;Enterobacter;Enterobacter_ludwigii	96.84	253	9e-122
denovo2373	Singleton	1	0	0	0	0	0	1	JN175342.1.1527_Bacteria;Proteobacteria;Gammaproteobacteria;Enterobacteriales;Enterobacteriaceae;Tatumella;Tatumella_punctata	96.84	253	9e-122
denovo2374	Singleton	1	1	0	0	0	0	0	FN429792.1.1506_Bacteria;Proteobacteria;Deltaproteobacteria;Desulfobacterales;Desulfobulbaceae;uncultured;uncultured_delta_proteobacterium	94.07	253	5e-105
denovo2375	Singleton	1	0	0	0	0	1	0	AM403313.1.1279_Bacteria;Bacteroidetes;Sphingobacteriia;Sphingobacteriales;KD3-93;uncultured_Bacteroidetes_bacterium	96.22	238	2e-110
denovo2376	Singleton	1	0	0	0	1	0	0	JN194132.1.1320_Bacteria;Proteobacteria;Gammaproteobacteria;Enterobacteriales;Enterobacteriaceae;Pantoea;bacterium_MPB_JP_b	95.65	253	1e-114
denovo2377	Singleton	1	0	0	0	0	0	1	GU584417.1.1396_Bacteria;Proteobacteria;Gammaproteobacteria;Thiotrichales;Piscirickettsiaceae;uncultured;uncultured_bacterium	94.86	253	8e-110
denovo2378	Singleton	1	0	0	0	0	0	1	X82290.1.1476_Bacteria;Proteobacteria;Alphaproteobacteria;Rhodospirillales;Acetobacteraceae;Gluconobacter;Gluconobacter_frateurii	94.47	253	2e-107
denovo2379	Singleton	1	0	0	0	0	1	0	JN662061.1.1381_Bacteria;Bacteroidetes;BD2-2;uncultured_Bacteroidetes_bacterium	96.05	253	5e-117
denovo238	Singleton	1	0	0	1	0	0	0	JN194132.1.1320_Bacteria;Proteobacteria;Gammaproteobacteria;Enterobacteriales;Enterobacteriaceae;Pantoea;bacterium_MPB_JP_b	94.47	253	2e-107
denovo2381	Singleton	1	1	0	0	0	0	0	JN175342.1.1527_Bacteria;Proteobacteria;Gammaproteobacteria;Enterobacteriales;Enterobacteriaceae;Tatumella;Tatumella_punctata	94.86	253	8e-110
denovo2382	Singleton	1	0	1	0	0	0	0	JF119129.1.1361_Bacteria;Proteobacteria;Gammaproteobacteria;Enterobacteriales;Enterobacteriaceae;Klebsiella;uncultured_bacterium	95.26	253	3e-112
denovo2384	Singleton	1	0	1	0	0	0	0	JN175342.1.1527_Bacteria;Proteobacteria;Gammaproteobacteria;Enterobacteriales;Enterobacteriaceae;Tatumella;Tatumella_punctata	95.26	253	3e-112
denovo2385	Singleton	1	0	0	0	0	0	1	DQ015828.1.1458_Bacteria;Proteobacteria;Alphaproteobacteria;Rhodospirillales;Rhodospirillaceae;uncultured;uncultured_bacterium	94.27	192	2e-78
denovo2386	Singleton	1	0	0	0	0	0	1	JN175342.1.1527_Bacteria;Proteobacteria;Gammaproteobacteria;Enterobacteriales;Enterobacteriaceae;Tatumella;Tatumella_punctata	96.05	253	5e-117
denovo2387	Singleton	1	0	0	0	0	0	1	X82290.1.1476_Bacteria;Proteobacteria;Alphaproteobacteria;Rhodospirillales;Acetobacteraceae;Gluconobacter;Gluconobacter_frateurii	98.02	253	6e-129
denovo2389	Singleton	1	0	0	1	0	0	0	JF915349.1.1403_Bacteria;Proteobacteria;Gammaproteobacteria;Enterobacteriales;Enterobacteriaceae;Kluyvera;Buttiauxella_sp._NW51	96.84	253	9e-122
denovo239	Singleton	1	0	0	0	0	0	1	JN175342.1.1527_Bacteria;Proteobacteria;Gammaproteobacteria;Enterobacteriales;Enterobacteriaceae;Tatumella;Tatumella_punctata	96.05	253	5e-117
denovo2390	Singleton	1	1	0	0	0	0	0	EF655670.1.1515_Bacteria;Proteobacteria;Deltaproteobacteria;Desulfuromonadales;Sva1033;uncultured_delta_proteobacterium	91.7	253	1e-90
denovo2391	Singleton	1	0	1	0	0	0	0	JN175342.1.1527_Bacteria;Proteobacteria;Gammaproteobacteria;Enterobacteriales;Enterobacteriaceae;Tatumella;Tatumella_punctata	96.44	253	2e-119
denovo2392	Singleton	1	0	0	0	0	0	1	JN175342.1.1527_Bacteria;Proteobacteria;Gammaproteobacteria;Enterobacteriales;Enterobacteriaceae;Tatumella;Tatumella_punctata	96.05	253	5e-117
denovo2393	Singleton	1	1	0	0	0	0	0	HM558240.1.1372_Bacteria;Proteobacteria;Gammaproteobacteria;Enterobacteriales;Enterobacteriaceae;Tatumella;uncultured_bacterium	95.65	253	1e-102
denovo2394	Singleton	1	0	0	0	1	0	0	JN175342.1.1527_Bacteria;Proteobacteria;Gammaproteobacteria;Enterobacteriales;Enterobacteriaceae;Tatumella;Tatumella_punctata	94.07	253	5e-105
denovo2395	Singleton	1	0	0	0	0	0	1	HM556474.1.1373_Bacteria;Proteobacteria;Gammaproteobacteria;Enterobacteriales;Enterobacteriaceae;Tatumella;uncultured_bacterium	95.65	253	1e-114
denovo2396	Singleton	1	0	0	0	0	1	0	X93216.1.1495_Bacteria;Proteobacteria;Gammaproteobacteria;Enterobacteriales;Enterobacteriaceae;Raoultella;Raoultella_planticola	95.26	253	3e-100
denovo2397	Singleton	1	0	1	0	0	0	0	HQ119947.1.1455_Bacteria;Proteobacteria;Alphaproteobacteria;Rickettsiales;SM2D12;uncultured_bacterium	95.53	246	2e-110
denovo2398	Singleton	1	0	0	0	0	0	1	JN175342.1.1527_Bacteria;Proteobacteria;Gammaproteobacteria;Enterobacteriales;Enterobacteriaceae;Tatumella;Tatumella_punctata	96.84	253	9e-122
denovo24	Singleton	1	0	0	1	0	0	0	EU574674.1.1439_Bacteria;Proteobacteria;Epsilonproteobacteria;Campylobacterales;Helicobacteraceae;Sulfurimonas;uncultured_bacterium	94.07	253	5e-105
denovo240	Singleton	1	0	0	0	0	1	0	HQ787611.1.1463_Bacteria;Proteobacteria;Gammaproteobacteria;Enterobacteriales;Enterobacteriaceae;Enterobacter;uncultured_organism	94.86	253	8e-110
denovo2400	Singleton	1	0	0	0	0	0	1	JN175342.1.1527_Bacteria;Proteobacteria;Gammaproteobacteria;Enterobacteriales;Enterobacteriaceae;Tatumella;Tatumella_punctata	96.05	253	5e-117
denovo2401	Singleton	1	0	1	0	0	0	0	JN175342.1.1527_Bacteria;Proteobacteria;Gammaproteobacteria;Enterobacteriales;Enterobacteriaceae;Tatumella;Tatumella_punctata	94.47	253	2e-107
denovo2402	Singleton	1	1	0	0	0	0	0	FJ202843.1.1506_Bacteria;Proteobacteria;Deltaproteobacteria;Desulfobacterales;Desulfobacteraceae;Desulforegula;uncultured_bacterium	91.7	253	1e-90
denovo2403	Singleton	1	0	0	0	0	0	1	JN175342.1.1527_Bacteria;Proteobacteria;Gammaproteobacteria;Enterobacteriales;Enterobacteriaceae;Tatumella;Tatumella_punctata	96.31	217	2e-100
denovo2404	Singleton	1	0	0	0	1	0	0	GU197437.1.1535_Bacteria;Proteobacteria;Deltaproteobacteria;Desulfobacterales;Desulfobacteraceae;Desulfobacula;uncultured_bacterium	92.89	253	7e-98
denovo2406	Singleton	1	0	1	0	0	0	0	U77482.1.1452_Bacteria;Proteobacteria;Gammaproteobacteria;Order_Incertae_Sedis;Family_Incertae_Sedis;Sedimenticola;Escarpia_spicata_endosymbiont	94.07	253	5e-105
denovo2407	Singleton	1	0	1	0	0	0	0	JN175342.1.1527_Bacteria;Proteobacteria;Gammaproteobacteria;Enterobacteriales;Enterobacteriaceae;Tatumella;Tatumella_punctata	96.05	253	5e-117
denovo2408	Singleton	1	0	0	0	0	0	1	U83098.1.1385_Bacteria;Proteobacteria;Alphaproteobacteria;Rickettsiales;Anaplasmataceae;Wolbachia;Wolbachia_sp.	96.84	253	9e-122
denovo2409	Singleton	1	0	0	0	0	0	1	JN175342.1.1527_Bacteria;Proteobacteria;Gammaproteobacteria;Enterobacteriales;Enterobacteriaceae;Tatumella;Tatumella_punctata	96.44	253	2e-119
denovo2410	Singleton	1	0	0	0	0	0	1	Z96085.1.1496_Bacteria;Proteobacteria;Gammaproteobacteria;Enterobacteriales;Enterobacteriaceae;Erwinia;Erwinia_psidii	94.07	253	5e-105
denovo2411	Singleton	1	0	0	0	1	0	0	JF706534.1.1396_Bacteria;Proteobacteria;Gammaproteobacteria;Enterobacteriales;Enterobacteriaceae;Erwinia;Erwinia_rhapontici	96.05	253	5e-117
denovo2412	Singleton	1	0	0	0	0	1	0	JN175342.1.1527_Bacteria;Proteobacteria;Gammaproteobacteria;Enterobacteriales;Enterobacteriaceae;Tatumella;Tatumella_punctata	96.05	253	5e-117
denovo2415	Singleton	1	0	0	0	0	1	0	JN194132.1.1320_Bacteria;Proteobacteria;Gammaproteobacteria;Enterobacteriales;Enterobacteriaceae;Pantoea;bacterium_MPB_JP_b	96.33	218	6e-101
denovo2416	Singleton	1	0	0	0	1	0	0	JN650586.1.1229_Bacteria;Proteobacteria;Betaproteobacteria;Burkholderiales;Oxalobacteraceae;Massilia;Massilia_sp._LCB71	93.28	253	3e-100
denovo2417	Singleton	1	1	0	0	0	0	0	GU220741.1.1462_Bacteria;Proteobacteria;Epsilonproteobacteria;Campylobacterales;Helicobacteraceae;Sulfurimonas;uncultured_bacterium	96.44	253	2e-119
denovo2418	Singleton	1	1	0	0	0	0	0	HM161853.1.1466_Bacteria;Proteobacteria;Gammaproteobacteria;Enterobacteriales;Enterobacteriaceae;Enterobacter;Pantoea_agglomerans	96.05	253	5e-117
denovo2419	Singleton	1	0	0	1	0	0	0	JN175342.1.1527_Bacteria;Proteobacteria;Gammaproteobacteria;Enterobacteriales;Enterobacteriaceae;Tatumella;Tatumella_punctata	94	250	3e-103
denovo242	Singleton	1	0	0	1	0	0	0	HM556852.1.1374_Bacteria;Proteobacteria;Gammaproteobacteria;Enterobacteriales;Enterobacteriaceae;Tatumella;uncultured_bacterium	96.05	253	5e-117
denovo2420	Singleton	1	0	0	0	0	1	0	HM558240.1.1372_Bacteria;Proteobacteria;Gammaproteobacteria;Enterobacteriales;Enterobacteriaceae;Tatumella;uncultured_bacterium	97.97	246	9e-125
denovo2421	Singleton	1	0	0	0	0	1	0	HM556852.1.1374_Bacteria;Proteobacteria;Gammaproteobacteria;Enterobacteriales;Enterobacteriaceae;Tatumella;uncultured_bacterium	91.7	253	1e-90
denovo2422	Singleton	1	0	0	0	1	0	0	JN990099.1.1503_Bacteria;Proteobacteria;Gammaproteobacteria;Enterobacteriales;Enterobacteriaceae;Enterobacter;uncultured_bacterium	96.4	250	1e-117
denovo2423	Singleton	1	0	1	0	0	0	0	JN825498.1.1417_Bacteria;Proteobacteria;Gammaproteobacteria;Xanthomonadales;Sinobacteraceae;JTB255_marine_benthic_group;uncultured_gamma_proteobacterium	95.26	253	3e-112
denovo2424	Singleton	1	0	1	0	0	0	0	JN175342.1.1527_Bacteria;Proteobacteria;Gammaproteobacteria;Enterobacteriales;Enterobacteriaceae;Tatumella;Tatumella_punctata	93.72	223	1e-89
denovo2425	Singleton	1	0	1	0	0	0	0	JN194132.1.1320_Bacteria;Proteobacteria;Gammaproteobacteria;Enterobacteriales;Enterobacteriaceae;Pantoea;bacterium_MPB_JP_b	96.05	253	5e-117
denovo2426	Singleton	1	1	0	0	0	0	0	AB530204.1.1503_Bacteria;Proteobacteria;Gammaproteobacteria;Order_Incertae_Sedis;Family_Incertae_Sedis;Sedimenticola;uncultured_bacterium	96.44	253	2e-119
denovo2427	Singleton	1	1	0	0	0	0	0	JN990099.1.1503_Bacteria;Proteobacteria;Gammaproteobacteria;Enterobacteriales;Enterobacteriaceae;Enterobacter;uncultured_bacterium	94.01	217	2e-88
denovo2428	Singleton	1	0	0	0	0	0	1	EF208680.1.1500_Bacteria;Proteobacteria;Gammaproteobacteria;Xanthomonadales;Sinobacteraceae;JTB255_marine_benthic_group;uncultured_bacterium	95.65	253	3e-115
denovo2429	Singleton	1	0	0	0	0	1	0	AB121100.1.1506_Bacteria;Spirochaetes;Spirochaetes;Spirochaetales;Spirochaetaceae;Spirochaeta;uncultured_Spirochaeta_sp.	92.86	252	3e-97
denovo243	Singleton	1	0	1	0	0	0	0	JN175342.1.1527_Bacteria;Proteobacteria;Gammaproteobacteria;Enterobacteriales;Enterobacteriaceae;Tatumella;Tatumella_punctata	96.05	253	5e-117
denovo2431	Singleton	1	0	1	0	0	0	0	GQ348186.1.1379_Bacteria;Proteobacteria;Gammaproteobacteria;Oceanospirillales;OM182_clade;uncultured_gamma_proteobacterium	94.07	253	5e-105
denovo2432	Singleton	1	0	0	0	0	1	0	AM040104.1.1489_Bacteria;Planctomycetes;Planctomycetacia;Planctomycetales;Planctomycetaceae;Pirellula;uncultured_planctomycete	99.6	253	2e-138
denovo2433	Singleton	1	0	0	1	0	0	0	JN175342.1.1527_Bacteria;Proteobacteria;Gammaproteobacteria;Enterobacteriales;Enterobacteriaceae;Tatumella;Tatumella_punctata	95.65	253	1e-114
denovo2434	Singleton	1	0	0	1	0	0	0	JF747799.1.1518_Bacteria;Proteobacteria;Deltaproteobacteria;Desulfobacterales;Desulfobulbaceae;Desulfocapsa;uncultured_bacterium	95.65	253	1e-114
denovo2435	Singleton	1	0	0	1	0	0	0	JN175342.1.1527_Bacteria;Proteobacteria;Gammaproteobacteria;Enterobacteriales;Enterobacteriaceae;Tatumella;Tatumella_punctata	96.44	253	2e-119
denovo2436	Singleton	1	0	0	1	0	0	0	GU941096.1.1413_Bacteria;Proteobacteria;Gammaproteobacteria;Aeromonadales;Aeromonadaceae;Aeromonas;uncultured_bacterium	94.86	253	8e-110
denovo2437	Singleton	1	0	0	0	0	0	1	HQ191058.1.1498_Bacteria;Proteobacteria;Gammaproteobacteria;BD7-8_marine_group;uncultured_sediment_bacterium	93.6	250	7e-101
denovo2438	Singleton	1	0	0	0	0	1	0	JN511213.1.1276_Bacteria;Proteobacteria;Deltaproteobacteria;Desulfobacterales;Desulfobacteraceae;uncultured;uncultured_organism	86.96	253	4e-62
denovo2439	Singleton	1	0	0	0	1	0	0	GQ267869.1.1364_Bacteria;Proteobacteria;Alphaproteobacteria;Rhodospirillales;Acetobacteraceae;Acetobacter;uncultured_bacterium	97.23	253	4e-124
denovo244	Singleton	1	0	0	0	0	0	1	JN175342.1.1527_Bacteria;Proteobacteria;Gammaproteobacteria;Enterobacteriales;Enterobacteriaceae;Tatumella;Tatumella_punctata	96.84	253	9e-122
denovo2441	Singleton	1	0	0	0	0	0	1	JN175342.1.1527_Bacteria;Proteobacteria;Gammaproteobacteria;Enterobacteriales;Enterobacteriaceae;Tatumella;Tatumella_punctata	96.05	253	5e-117
denovo2442	Singleton	1	1	0	0	0	0	0	HQ787611.1.1463_Bacteria;Proteobacteria;Gammaproteobacteria;Enterobacteriales;Enterobacteriaceae;Enterobacter;uncultured_organism	94.07	253	5e-105
denovo2443	Singleton	1	0	0	0	0	1	0	JN175342.1.1527_Bacteria;Proteobacteria;Gammaproteobacteria;Enterobacteriales;Enterobacteriaceae;Tatumella;Tatumella_punctata	96.84	253	9e-122
denovo2444	Singleton	1	1	0	0	0	0	0	JN175342.1.1527_Bacteria;Proteobacteria;Gammaproteobacteria;Enterobacteriales;Enterobacteriaceae;Tatumella;Tatumella_punctata	96.44	253	2e-119
denovo2447	Singleton	1	0	0	0	0	1	0	JN175342.1.1527_Bacteria;Proteobacteria;Gammaproteobacteria;Enterobacteriales;Enterobacteriaceae;Tatumella;Tatumella_punctata	96	250	3e-115
denovo2448	Singleton	1	0	0	0	1	0	0	JN175342.1.1527_Bacteria;Proteobacteria;Gammaproteobacteria;Enterobacteriales;Enterobacteriaceae;Tatumella;Tatumella_punctata	95.26	253	3e-112
denovo2449	Singleton	1	0	0	0	0	1	0	EU289465.1.1506_Bacteria;Proteobacteria;Gammaproteobacteria;Enterobacteriales;Enterobacteriaceae;Trabulsiella;uncultured_bacterium	96.35	219	1e-101
denovo245	Singleton	1	0	0	0	1	0	0	JN175342.1.1527_Bacteria;Proteobacteria;Gammaproteobacteria;Enterobacteriales;Enterobacteriaceae;Tatumella;Tatumella_punctata	93.68	253	1e-102
denovo2452	Singleton	1	0	0	0	0	1	0	JN175342.1.1527_Bacteria;Proteobacteria;Gammaproteobacteria;Enterobacteriales;Enterobacteriaceae;Tatumella;Tatumella_punctata	94.8	250	5e-108
denovo2454	Singleton	1	0	1	0	0	0	0	JN175342.1.1527_Bacteria;Proteobacteria;Gammaproteobacteria;Enterobacteriales;Enterobacteriaceae;Tatumella;Tatumella_punctata	95.26	253	3e-112
denovo2455	Singleton	1	1	0	0	0	0	0	HM556852.1.1374_Bacteria;Proteobacteria;Gammaproteobacteria;Enterobacteriales;Enterobacteriaceae;Tatumella;uncultured_bacterium	95.26	253	3e-112
denovo2456	Singleton	1	0	0	0	0	1	0	JN175342.1.1527_Bacteria;Proteobacteria;Gammaproteobacteria;Enterobacteriales;Enterobacteriaceae;Tatumella;Tatumella_punctata	95.65	253	1e-114
denovo2458	Singleton	1	0	0	0	0	1	0	JN175342.1.1527_Bacteria;Proteobacteria;Gammaproteobacteria;Enterobacteriales;Enterobacteriaceae;Tatumella;Tatumella_punctata	95.65	253	1e-114
denovo2459	Singleton	1	0	0	0	1	0	0	JN194132.1.1320_Bacteria;Proteobacteria;Gammaproteobacteria;Enterobacteriales;Enterobacteriaceae;Pantoea;bacterium_MPB_JP_b	96.44	253	2e-119
denovo246	Singleton	1	0	1	0	0	0	0	JN175342.1.1527_Bacteria;Proteobacteria;Gammaproteobacteria;Enterobacteriales;Enterobacteriaceae;Tatumella;Tatumella_punctata	96.3	216	9e-100
denovo2460	Singleton	1	1	0	0	0	0	0	JN175342.1.1527_Bacteria;Proteobacteria;Gammaproteobacteria;Enterobacteriales;Enterobacteriaceae;Tatumella;Tatumella_punctata	95.26	253	3e-112
denovo2461	Singleton	1	0	0	0	0	0	1	HQ203810.1.1476_Bacteria;Proteobacteria;Epsilonproteobacteria;Campylobacterales;Helicobacteraceae;Sulfurimonas;uncultured_bacterium	92	250	2e-91
denovo2463	Singleton	1	1	0	0	0	0	0	JN194132.1.1320_Bacteria;Proteobacteria;Gammaproteobacteria;Enterobacteriales;Enterobacteriaceae;Pantoea;bacterium_MPB_JP_b	95.65	253	1e-114
denovo2464	Singleton	1	0	1	0	0	0	0	JN175342.1.1527_Bacteria;Proteobacteria;Gammaproteobacteria;Enterobacteriales;Enterobacteriaceae;Tatumella;Tatumella_punctata	96.05	253	5e-117
denovo2465	Singleton	1	0	1	0	0	0	0	HQ787611.1.1463_Bacteria;Proteobacteria;Gammaproteobacteria;Enterobacteriales;Enterobacteriaceae;Enterobacter;uncultured_organism	96.44	253	2e-119
denovo2467	Singleton	1	0	0	0	0	0	1	JN194132.1.1320_Bacteria;Proteobacteria;Gammaproteobacteria;Enterobacteriales;Enterobacteriaceae;Pantoea;bacterium_MPB_JP_b	95.26	253	3e-112
denovo2468	Singleton	1	0	0	0	0	0	1	AB193905.1.1466_Bacteria;Candidate_division_OD1;uncultured_bacterium	88.48	217	1e-59
denovo2469	Singleton	1	0	1	0	0	0	0	JN194132.1.1320_Bacteria;Proteobacteria;Gammaproteobacteria;Enterobacteriales;Enterobacteriaceae;Pantoea;bacterium_MPB_JP_b	96.84	253	9e-122
denovo247	Singleton	1	1	0	0	0	0	0	JN175342.1.1527_Bacteria;Proteobacteria;Gammaproteobacteria;Enterobacteriales;Enterobacteriaceae;Tatumella;Tatumella_punctata	92.89	253	7e-98
denovo2470	Singleton	1	0	0	0	0	0	1	GU584306.1.1398_Bacteria;Proteobacteria;Gammaproteobacteria;Thiotrichales;Piscirickettsiaceae;uncultured;uncultured_bacterium	97.4	192	1e-92
denovo2472	Singleton	1	0	0	0	0	0	1	EF509857.1.1417_Bacteria;Proteobacteria;Gammaproteobacteria;Enterobacteriales;Enterobacteriaceae;Klebsiella;uncultured_bacterium	97.23	253	4e-124
denovo2473	Singleton	1	0	1	0	0	0	0	GQ072634.1.1298_Bacteria;Cyanobacteria;Chloroplast;uncultured_eukaryote	96.05	253	5e-117
denovo2474	Singleton	1	0	1	0	0	0	0	JN175342.1.1527_Bacteria;Proteobacteria;Gammaproteobacteria;Enterobacteriales;Enterobacteriaceae;Tatumella;Tatumella_punctata	93.68	253	1e-102
denovo2475	Singleton	1	0	0	1	0	0	0	EU287316.1.1495_Bacteria;Proteobacteria;Gammaproteobacteria;Alteromonadales;Shewanellaceae;Shewanella;uncultured_bacterium	92.89	253	7e-98
denovo2476	Singleton	1	0	1	0	0	0	0	JF690979.1.1419_Bacteria;Proteobacteria;Gammaproteobacteria;Enterobacteriales;Enterobacteriaceae;Enterobacter;Enterobacter_ludwigii	96.44	253	2e-119
denovo2477	Singleton	1	0	0	0	0	1	0	JN175342.1.1527_Bacteria;Proteobacteria;Gammaproteobacteria;Enterobacteriales;Enterobacteriaceae;Tatumella;Tatumella_punctata	96.44	253	2e-119
denovo2478	Singleton	1	0	0	0	0	1	0	JN530262.1.1510_Bacteria;Lentisphaerae;Lentisphaeria;WCHB1-41;uncultured_organism	93.25	252	1e-99
denovo248	Singleton	1	0	0	0	0	0	1	JN194132.1.1320_Bacteria;Proteobacteria;Gammaproteobacteria;Enterobacteriales;Enterobacteriaceae;Pantoea;bacterium_MPB_JP_b	96.44	253	2e-119
denovo2483	Singleton	1	0	0	0	1	0	0	JN175342.1.1527_Bacteria;Proteobacteria;Gammaproteobacteria;Enterobacteriales;Enterobacteriaceae;Tatumella;Tatumella_punctata	96.84	253	9e-122
denovo2485	Singleton	1	0	0	0	1	0	0	JN175342.1.1527_Bacteria;Proteobacteria;Gammaproteobacteria;Enterobacteriales;Enterobacteriaceae;Tatumella;Tatumella_punctata	93.28	253	3e-100
denovo2486	Singleton	1	0	0	0	1	0	0	JN175342.1.1527_Bacteria;Proteobacteria;Gammaproteobacteria;Enterobacteriales;Enterobacteriaceae;Tatumella;Tatumella_punctata	94.69	245	4e-105
denovo2487	Singleton	1	0	0	0	0	1	0	GQ357029.1.1481_Bacteria;Bacteroidetes;BD2-2;uncultured_bacterium	93.68	253	1e-102
denovo2489	Singleton	1	0	0	0	1	0	0	CP001087.2549011.2550557_Bacteria;Proteobacteria;Deltaproteobacteria;Desulfobacterales;Desulfobacteraceae;Desulfobacterium;Desulfobacterium_autotrophicum_HRM2	91.43	245	5e-86
denovo249	Singleton	1	0	0	1	0	0	0	JN175342.1.1527_Bacteria;Proteobacteria;Gammaproteobacteria;Enterobacteriales;Enterobacteriaceae;Tatumella;Tatumella_punctata	96.4	250	1e-117
denovo2490	Singleton	1	0	1	0	0	0	0	EU491798.1.1466_Bacteria;Proteobacteria;Gammaproteobacteria;Oceanospirillales;Alcanivoracaceae;Kangiella;uncultured_bacterium	94.47	253	2e-107
denovo2492	Singleton	1	1	0	0	0	0	0	JN990099.1.1503_Bacteria;Proteobacteria;Gammaproteobacteria;Enterobacteriales;Enterobacteriaceae;Enterobacter;uncultured_bacterium	95.26	253	3e-112
denovo2493	Singleton	1	0	0	0	0	0	1	JN175342.1.1527_Bacteria;Proteobacteria;Gammaproteobacteria;Enterobacteriales;Enterobacteriaceae;Tatumella;Tatumella_punctata	97.2	250	2e-122
denovo2494	Singleton	1	0	0	0	0	1	0	GQ921469.1.1495_Bacteria;Proteobacteria;Gammaproteobacteria;Pseudomonadales;Moraxellaceae;Acinetobacter;uncultured_bacterium	95.98	249	1e-114
denovo2495	Singleton	1	1	0	0	0	0	0	HQ916532.1.1405_Bacteria;Proteobacteria;Gammaproteobacteria;Order_Incertae_Sedis;Family_Incertae_Sedis;Thiohalophilus;uncultured_bacterium	94.47	253	2e-107
denovo2496	Singleton	1	0	0	0	0	1	0	JN194132.1.1320_Bacteria;Proteobacteria;Gammaproteobacteria;Enterobacteriales;Enterobacteriaceae;Pantoea;bacterium_MPB_JP_b	96.84	253	9e-122
denovo2497	Singleton	1	0	1	0	0	0	0	HM556474.1.1373_Bacteria;Proteobacteria;Gammaproteobacteria;Enterobacteriales;Enterobacteriaceae;Tatumella;uncultured_bacterium	95.26	253	3e-112
denovo2498	Singleton	1	0	0	0	1	0	0	JN175342.1.1527_Bacteria;Proteobacteria;Gammaproteobacteria;Enterobacteriales;Enterobacteriaceae;Tatumella;Tatumella_punctata	94.86	253	8e-110
denovo25	Singleton	1	0	0	1	0	0	0	JN990099.1.1503_Bacteria;Proteobacteria;Gammaproteobacteria;Enterobacteriales;Enterobacteriaceae;Enterobacter;uncultured_bacterium	96.05	253	5e-117
denovo250	Singleton	1	0	0	0	0	1	0	FJ264662.1.1511_Bacteria;Proteobacteria;Gammaproteobacteria;Alteromonadales;Alteromonadaceae;Haliea;uncultured_bacterium	96.05	253	5e-117
denovo2500	Singleton	1	0	0	0	1	0	0	GQ898783.1.1496_Bacteria;Bacteroidetes;Bacteroidia;Bacteroidales;Prevotellaceae;Paraprevotella;uncultured_bacterium	100	252	3e-140
denovo2501	Singleton	1	1	0	0	0	0	0	JN175342.1.1527_Bacteria;Proteobacteria;Gammaproteobacteria;Enterobacteriales;Enterobacteriaceae;Tatumella;Tatumella_punctata	96.44	253	2e-119
[truncated: 1,519 more rows]
